# Supplementary material for: Tissue-Specific Transcriptomic Analysis Reveals the Response Mechanism of Cold Stress in Poa crymophila, a Native Grass in Qinghai-Tibet Plateau
Source: Preprints.org preprint supplement (doi:10.20944/preprints202311.0336.v1), 2023-11-06
Supplement: Supplementary file 1 [file Table S1 Summary of Illumina sequencing data and assembled results.xlsx]

## Sheet: Sheet1
Table S1 Summary of Illumina sequencing data and assembled results
Samples	Clean Reads	Base Number	Mapped Reads	Mapped Ratio	GC Content（%）	≥Q30%
L0-1	20932343	6268721704	11888163	0.5679	0.5618	0.94
L0-2	22940228	6869783834	14317900	0.6241	0.5617	0.9325
L0-3	24603879	7367021896	14825983	0.6026	0.5566	0.9571
L3-1	20724916	6205230430	17748322	0.6271	0.5499	0.9443
L3-2	29214439	8746713464	13651726	0.6193	0.5401	0.9531
L3-3	22316282	6683899750	18544667	0.7046	0.5523	0.9521
L6-1	28302132	8473067012	14042487	0.6776	0.5422	0.956
L6-2	22043486	6601576898	18519161	0.6339	0.5451	0.9476
L6-3	26318369	7877025842	14441482	0.6471	0.5468	0.9536
R0-1	28373730	8457260374	18971842	0.684	0.5482	0.9545
R0-2	21055590	6303796258	15205938	0.6928	0.5504	0.9526
R0-3	29677511	8853307146	15285329	0.692	0.5454	0.9563
R3-1	21414514	6410973048	18960643	0.6682	0.5477	0.9495
R3-2	22276761	6665706078	13131962	0.6237	0.55	0.9478
R3-3	22700732	6790599576	20643045	0.6956	0.5535	0.9505
R6-1	27736603	8281238120	13951838	0.6515	0.5564	0.9543
R6-2	21947548	6553945902	13706539	0.6153	0.5547	0.9558
R6-3	22088428	6605755084	15706026	0.6919	0.5605	0.9551
S0-1	22225421	6643993566	15358299	0.691	0.5679	0.9546
S0-2	21560358	6457803136	13228621	0.6136	0.5525	0.9269
S0-3	22400710	6675973604	15163454	0.6769	0.5649	0.9461
S3-1	20345110	6091584728	13392415	0.6583	0.55	0.951
S3-2	26682816	7984878964	17423395	0.653	0.5492	0.9571
S3-3	20032154	5985880918	12891964	0.6436	0.5518	0.9393
S6-1	26496663	7896982138	18557768	0.7004	0.5514	0.9561
S6-2	24652891	7368860612	15316730	0.6213	0.5558	0.9545
S6-3	27327382	8162668398	19004116	0.6954	0.5502	0.9545
Mean	23940407	7158675870	15699252	0.6545	0.5525	0.9501
