# Supplementary material for: Tissue-Specific Transcriptomic Analysis Reveals the Response Mechanism of Cold Stress in Poa crymophila, a Native Grass in Qinghai-Tibet Plateau
Source: Preprints.org preprint supplement (doi:10.20944/preprints202311.0336.v1), 2023-11-06
Supplement: Supplementary file 3 [file Table S10 Differently expressed genes related to hormone signaling of roots, stems and leaves under cold stress.xlsx]

## Sheet: Roots
Table S10 Differently expressed genes related to hormone signaling of roots, stems and leaves under cold stress.
Hormone	Gene classification	ID	Gene name	R0_vs_R3_DESeq2_FDR	R0_vs_R3_DESeq2_log2FC	R0_vs_R3_regulated	R0_vs_R6_DESeq2_FDR	R0_vs_R6_DESeq2_log2FC	R0_vs_R6_regulated	Pfam_annotation	Swissprot_annotation	nr_annotation	GO_second_level_annotation	KEGG_pathway_annotation
Abscisic acid (ABA)	PYL(PYR1-like protein)	Unigene_312616	PYL5	0.00964345	-1.54911	down	0.839396	-0.378475	normal	Polyketide cyclase / dehydrase and lipid transport;; Pathogenesis-related protein Bet v 1 family	Abscisic acid receptor PYL5 OS=Arabidopsis thaliana OX=3702 GN=PYL5 PE=1 SV=1	abscisic acid receptor PYL4-like [Aegilops tauschii subsp. tauschii]	--	MAPK signaling pathway - plant (ko04016);; Plant hormone signal transduction (ko04075)
		Unigene_056541	PYL9	0.000350641	-2.71087	down	0.183859	-1.50064	normal	Polyketide cyclase / dehydrase and lipid transport;; Pathogenesis-related protein Bet v 1 family	Abscisic acid receptor PYL9 OS=Oryza sativa subsp. japonica OX=39947 GN=PYL9 PE=1 SV=1	abscisic acid receptor PYL2-like [Aegilops tauschii subsp. tauschii]	biological process: response to stimulus (GO:0050896);; molecular function: molecular function regulator (GO:0098772);; biological process: biological regulation (GO:0065007);; molecular function: binding (GO:0005488);; cellular component: cell (GO:0005623);; cellular component: cell part (GO:0044464);; cellular component: organelle (GO:0043226);; biological process: cellular process (GO:0009987)…	MAPK signaling pathway - plant (ko04016);; Plant hormone signal transduction (ko04075)
		Unigene_059980	PYL9	0.00358239	-2.84034	down	0.265236	-1.35229	normal	Polyketide cyclase / dehydrase and lipid transport;; Pathogenesis-related protein Bet v 1 family;; Polyketide cyclase / dehydrase and lipid transport	Abscisic acid receptor PYL9 OS=Oryza sativa subsp. japonica OX=39947 GN=PYL9 PE=1 SV=1	uncharacterized protein C2845_PM11G01770 [Panicum miliaceum]	biological process: response to stimulus (GO:0050896);; molecular function: molecular function regulator (GO:0098772);; biological process: biological regulation (GO:0065007);; molecular function: binding (GO:0005488);; cellular component: cell (GO:0005623);; cellular component: cell part (GO:0044464);; cellular component: organelle (GO:0043226);; biological process: cellular process (GO:0009987)…	MAPK signaling pathway - plant (ko04016);; Plant hormone signal transduction (ko04075)
	SNF1-Related Protein Kinase 2 (SnRK2)	Unigene_176072	SAPK2	0.00835036	-1.1037	down	0.720894	-0.730955	normal	Protein kinase domain;; Protein tyrosine and serine/threonine kinase	Serine/threonine-protein kinase SAPK2 OS=Oryza sativa subsp. indica OX=39946 GN=SAPK2 PE=2 SV=2	serine/threonine-protein kinase SAPK2 [Aegilops tauschii subsp. tauschii]	biological process: response to stimulus (GO:0050896);; molecular function: catalytic activity (GO:0003824);; biological process: metabolic process (GO:0008152);; biological process: cellular process (GO:0009987);; molecular function: binding (GO:0005488);; cellular component: cell (GO:0005623);; cellular component: cell part (GO:0044464);; cellular component: organelle (GO:0043226);; biological …	MAPK signaling pathway - plant (ko04016);; Plant hormone signal transduction (ko04075)
	Protein Phosphatase 2C (PP2C)	Unigene_519100	Os04g0452000	0.0296671	3.33193	normal	0.000215687	5.3063	up	Protein phosphatase 2C;; Stage II sporulation protein E (SpoIIE)	Probable protein phosphatase 2C 41 OS=Oryza sativa subsp. japonica OX=39947 GN=Os04g0452000 PE=2 SV=2	putative protein phosphatase 2C 41 [Hordeum vulgare]	molecular function: catalytic activity (GO:0003824);; cellular component: cell (GO:0005623);; cellular component: membrane (GO:0016020);; cellular component: cell part (GO:0044464)	--
		Unigene_516504	Os04g0609600	0.0211649	2.72961	normal	0.00157678	4.17231	up	Protein phosphatase 2C	Probable protein phosphatase 2C 44 OS=Oryza sativa subsp. japonica OX=39947 GN=Os04g0609600 PE=2 SV=1	probable protein phosphatase 2C 44 [Brachypodium distachyon]	molecular function: catalytic activity (GO:0003824)	--
		Unigene_601295	Os06g0717800	0.0456356	2.736	normal	0.00672645	3.48727	up	Protein phosphatase 2C	Probable protein phosphatase 2C 60 OS=Oryza sativa subsp. japonica OX=39947 GN=Os06g0717800 PE=2 SV=1	hypothetical protein CFC21_038700 [Triticum aestivum]	molecular function: catalytic activity (GO:0003824)	--
		Unigene_527830	Os07g0566200	--	--	--	0.00013257	5.62276	up	Protein phosphatase 2C	Probable protein phosphatase 2C 64 OS=Oryza sativa subsp. japonica OX=39947 GN=Os07g0566200 PE=2 SV=2	probable protein phosphatase 2C 64 [Aegilops tauschii subsp. tauschii]	molecular function: catalytic activity (GO:0003824);; biological process: metabolic process (GO:0008152);; biological process: cellular process (GO:0009987);; cellular component: cell (GO:0005623);; cellular component: membrane (GO:0016020);; cellular component: cell part (GO:0044464)	--
		Unigene_318085	PP2C50	0.0130133	-1.61783	normal	0.00933445	-2.20459	down	Protein phosphatase 2C	Protein phosphatase 2C 50 OS=Oryza sativa subsp. japonica OX=39947 GN=PP2C50 PE=1 SV=1	putative protein phosphatase 2C 50 [Hordeum vulgare]	molecular function: catalytic activity (GO:0003824);; biological process: metabolic process (GO:0008152);; biological process: cellular process (GO:0009987)	MAPK signaling pathway - plant (ko04016);; Plant hormone signal transduction (ko04075)
		Unigene_198956	XB15	0.0158423	3.03927	normal	0.000520252	4.80315	up	Protein phosphatase 2C	Protein phosphatase 2C 35 OS=Oryza sativa subsp. japonica OX=39947 GN=XB15 PE=1 SV=1	unnamed protein product [Triticum turgidum subsp. durum]	biological process: metabolic process (GO:0008152);; biological process: single-organism process (GO:0044699);; molecular function: catalytic activity (GO:0003824);; cellular component: cell (GO:0005623);; cellular component: cell part (GO:0044464);; biological process: cellular process (GO:0009987)	--
		Unigene_528394	XB15	0.026149	3.27679	normal	0.000317292	5.07481	up	Protein phosphatase 2C	Protein phosphatase 2C 35 OS=Oryza sativa subsp. japonica OX=39947 GN=XB15 PE=1 SV=1	hypothetical protein CFC21_080525 [Triticum aestivum]	molecular function: catalytic activity (GO:0003824);; cellular component: cell (GO:0005623);; cellular component: membrane (GO:0016020);; cellular component: cell part (GO:0044464);; biological process: multicellular organismal process (GO:0032501);; biological process: developmental process (GO:0032502);; biological process: single-organism process (GO:0044699)	--
Ethylene （ETH）	Ethylene-insensitive 3(EIN3)	Unigene_075650	EBF1	0.00698247	-1.30322	down	0.40084	-1.23657	normal	Leucine Rich repeats (2 copies);; Leucine Rich repeat	EIN3-binding F-box protein 1 OS=Arabidopsis thaliana OX=3702 GN=EBF1 PE=1 SV=1	EIN3-binding F-box protein 1-like [Aegilops tauschii subsp. tauschii]	cellular component: cell (GO:0005623);; cellular component: macromolecular complex (GO:0032991);; cellular component: cell part (GO:0044464);; molecular function: binding (GO:0005488);; cellular component: organelle (GO:0043226);; biological process: metabolic process (GO:0008152);; biological process: cellular process (GO:0009987);; biological process: response to stimulus (GO:0050896);; biologi…	MAPK signaling pathway - plant (ko04016);; Plant hormone signal transduction (ko04075)
		Unigene_325364	EBF1	0.00357205	-1.47892	down	0.521896	-1.21792	normal	Leucine Rich repeat;; Leucine Rich repeats (2 copies);; Leucine Rich Repeat	EIN3-binding F-box protein 1 OS=Arabidopsis thaliana OX=3702 GN=EBF1 PE=1 SV=1	EIN3-binding F-box protein 1-like [Aegilops tauschii subsp. tauschii]	cellular component: cell (GO:0005623);; cellular component: macromolecular complex (GO:0032991);; cellular component: cell part (GO:0044464);; molecular function: binding (GO:0005488);; cellular component: organelle (GO:0043226);; biological process: metabolic process (GO:0008152);; biological process: cellular process (GO:0009987);; biological process: response to stimulus (GO:0050896);; biologi…	MAPK signaling pathway - plant (ko04016);; Plant hormone signal transduction (ko04075)
	Ethylene-insensitive	Unigene_506928	EIL2	0.0213475	-2.22958	normal	0.00842436	-1.96955	down	Ethylene insensitive 3	Protein ETHYLENE-INSENSITIVE 3-like 2 OS=Oryza sativa subsp. japonica OX=39947 GN=EIL2 PE=2 SV=2	hypothetical protein CFC21_021680 [Triticum aestivum]	cellular component: cell (GO:0005623);; cellular component: organelle (GO:0043226);; cellular component: cell part (GO:0044464)	MAPK signaling pathway - plant (ko04016);; Plant hormone signal transduction (ko04075)
		Unigene_023283	EIL1A	0.00732213	3.19998	up	0.0772279	2.31766	normal	Ethylene insensitive 3	Protein ETHYLENE-INSENSITIVE 3-like 1a OS=Oryza sativa subsp. japonica OX=39947 GN=EIL1A PE=1 SV=1	hypothetical protein CFC21_057728 [Triticum aestivum]	biological process: cellular process (GO:0009987);; biological process: signaling (GO:0023052);; biological process: single-organism process (GO:0044699);; biological process: response to stimulus (GO:0050896);; biological process: biological regulation (GO:0065007);; molecular function: binding (GO:0005488);; molecular function: nucleic acid binding transcription factor activity (GO:0001071);; c…	MAPK signaling pathway - plant (ko04016);; Plant hormone signal transduction (ko04075)
		Unigene_199296	EIN2	0.00881402	3.2466	up	0.0269055	2.41674	normal	Natural resistance-associated macrophage protein	Protein ETHYLENE-INSENSITIVE 2 OS=Oryza sativa subsp. japonica OX=39947 GN=EIN2 PE=2 SV=1	protein ETHYLENE-INSENSITIVE 2 [Brachypodium distachyon]	biological process: cellular process (GO:0009987);; biological process: signaling (GO:0023052);; biological process: single-organism process (GO:0044699);; biological process: response to stimulus (GO:0050896);; biological process: biological regulation (GO:0065007);; biological process: developmental process (GO:0032502);; biological process: multi-organism process (GO:0051704);; biological proc…	MAPK signaling pathway - plant (ko04016);; Plant hormone signal transduction (ko04075)
	Ethylene response factor(ERF)	Unigene_518350	ERF2	0.0783133	2.20148	normal	0.000836551	4.40048	up	AP2 domain	Ethylene-responsive transcription factor 2 OS=Nicotiana sylvestris OX=4096 GN=ERF2 PE=2 SV=1	ethylene-responsive factor [Thinopyrum intermedium]	biological process: cellular process (GO:0009987);; biological process: signaling (GO:0023052);; biological process: single-organism process (GO:0044699);; biological process: response to stimulus (GO:0050896);; biological process: biological regulation (GO:0065007);; biological process: immune system process (GO:0002376);; molecular function: nucleic acid binding transcription factor activity (G…	--
		Unigene_064917	ERF4	0.0429444	3.01829	normal	0.000245309	5.17606	up	AP2 domain	Ethylene-responsive transcription factor 4 OS=Arabidopsis thaliana OX=3702 GN=ERF4 PE=1 SV=1	ethylene-responsive factor-like transcription factor ERFL2b [Hordeum vulgare]	molecular function: nucleic acid binding transcription factor activity (GO:0001071);; biological process: biological regulation (GO:0065007)	--
		Unigene_175470	ERF4	0.412034	-1.3978	normal	0.00782819	-3.26063	down	AP2 domain	Ethylene-responsive transcription factor 4 OS=Arabidopsis thaliana OX=3702 GN=ERF4 PE=1 SV=1	ethylene-responsive transcription factor 3 [Agropyron mongolicum]	molecular function: nucleic acid binding transcription factor activity (GO:0001071);; biological process: biological regulation (GO:0065007)	--
		Unigene_597634	ERF4	0.149051	2.45559	normal	0.00195483	4.26006	up	--	Ethylene-responsive transcription factor 4 OS=Arabidopsis thaliana OX=3702 GN=ERF4 PE=1 SV=1	ethylene-responsive transcription factor 3 [Agropyron mongolicum]	--	--
		Unigene_002440	ERF109	0.0815197	2.82221	normal	2.53241e-05	6.14837	up	AP2 domain	Ethylene-responsive transcription factor ERF109 OS=Arabidopsis thaliana OX=3702 GN=ERF109 PE=1 SV=1	root abundant factor [Hordeum vulgare]	molecular function: nucleic acid binding transcription factor activity (GO:0001071);; biological process: biological regulation (GO:0065007)	--
		Unigene_186026	ERF008	0.0082916	-2.57201	down	0.702503	-0.800924	normal	AP2 domain	Ethylene-responsive transcription factor ERF008 OS=Arabidopsis thaliana OX=3702 GN=ERF008 PE=2 SV=1	--	biological process: response to stimulus (GO:0050896);; molecular function: nucleic acid binding transcription factor activity (GO:0001071);; biological process: biological regulation (GO:0065007)	--
		Unigene_318242	ERF013	0.00423725	1.9363	up	0.126227	1.85723	normal	AP2 domain	Ethylene-responsive transcription factor ERF013 OS=Arabidopsis thaliana OX=3702 GN=ERF013 PE=2 SV=1	ethylene-responsive transcription factor ERF014-like [Aegilops tauschii subsp. tauschii]	molecular function: binding (GO:0005488);; biological process: response to stimulus (GO:0050896);; biological process: immune system process (GO:0002376);; biological process: biological regulation (GO:0065007);; molecular function: nucleic acid binding transcription factor activity (GO:0001071);; cellular component: cell (GO:0005623);; cellular component: cell part (GO:0044464);; cellular compon…	--
		Unigene_599671	ERF013	0.00602337	3.98597	up	3.81089e-05	5.81082	up	AP2 domain	Ethylene-responsive transcription factor ERF013 OS=Arabidopsis thaliana OX=3702 GN=ERF013 PE=2 SV=1	ethylene-responsive transcription factor ERF014-like [Aegilops tauschii subsp. tauschii]	molecular function: binding (GO:0005488);; biological process: response to stimulus (GO:0050896);; biological process: immune system process (GO:0002376);; biological process: biological regulation (GO:0065007);; molecular function: nucleic acid binding transcription factor activity (GO:0001071);; cellular component: cell (GO:0005623);; cellular component: cell part (GO:0044464);; cellular compon…	--
		Unigene_515126	ERF020	0.01328	3.86212	normal	7.65784e-05	5.7459	up	AP2 domain	Ethylene-responsive transcription factor ERF020 OS=Arabidopsis thaliana OX=3702 GN=ERF020 PE=2 SV=1	hypothetical protein D1007_13819 [Hordeum vulgare]	biological process: response to stimulus (GO:0050896);; molecular function: nucleic acid binding transcription factor activity (GO:0001071);; biological process: biological regulation (GO:0065007);; cellular component: cell (GO:0005623);; cellular component: cell part (GO:0044464);; cellular component: organelle (GO:0043226);; biological process: cellular process (GO:0009987)	MAPK signaling pathway - plant (ko04016);; Plant hormone signal transduction (ko04075)
		Unigene_040928	ERF025	0.228974	2.07102	normal	0.00084327	5.0951	up	AP2 domain	Ethylene-responsive transcription factor ERF025 OS=Arabidopsis thaliana OX=3702 GN=ERF025 PE=2 SV=1	ethylene-responsive transcription factor ERF027-like [Aegilops tauschii subsp. tauschii]	molecular function: binding (GO:0005488);; molecular function: nucleic acid binding transcription factor activity (GO:0001071);; biological process: biological regulation (GO:0065007);; biological process: metabolic process (GO:0008152);; biological process: cellular process (GO:0009987);; biological process: single-organism process (GO:0044699);; biological process: response to stimulus (GO:0050…	MAPK signaling pathway - plant (ko04016);; Plant hormone signal transduction (ko04075)
		Unigene_318026	ERF025	1.72791e-05	-1.65438	down	0.525838	-1.18376	normal	AP2 domain	Ethylene-responsive transcription factor ERF025 OS=Arabidopsis thaliana OX=3702 GN=ERF025 PE=2 SV=1	ethylene-responsive transcription factor ERF027-like [Aegilops tauschii subsp. tauschii]	molecular function: binding (GO:0005488);; molecular function: nucleic acid binding transcription factor activity (GO:0001071);; biological process: biological regulation (GO:0065007);; biological process: metabolic process (GO:0008152);; biological process: cellular process (GO:0009987);; biological process: single-organism process (GO:0044699);; biological process: response to stimulus (GO:0050…	--
		Unigene_592685	ERF025	0.0785647	2.92623	normal	0.00141163	4.49805	up	AP2 domain	Ethylene-responsive transcription factor ERF025 OS=Arabidopsis thaliana OX=3702 GN=ERF025 PE=2 SV=1	hypothetical protein CFC21_024786 [Triticum aestivum]	molecular function: nucleic acid binding transcription factor activity (GO:0001071);; biological process: biological regulation (GO:0065007)	MAPK signaling pathway - plant (ko04016);; Plant hormone signal transduction (ko04075)
		Unigene_072378	ERF060	0.000155031	-1.47296	down	0.90165	0.21551	normal	AP2 domain	Ethylene-responsive transcription factor ERF060 OS=Arabidopsis thaliana OX=3702 GN=ERF060 PE=1 SV=1	DBF2 protein [Aegilops biuncialis]	molecular function: nucleic acid binding transcription factor activity (GO:0001071);; biological process: biological regulation (GO:0065007);; biological process: response to stimulus (GO:0050896)	--
		Unigene_173246	ERF109	0.22151	1.57009	normal	0.00103013	4.61552	up	--	Ethylene-responsive transcription factor ERF109 OS=Arabidopsis thaliana OX=3702 GN=ERF109 PE=1 SV=1	ethylene-responsive transcription factor ERF109 [Brachypodium distachyon]	molecular function: nucleic acid binding transcription factor activity (GO:0001071);; biological process: biological regulation (GO:0065007);; biological process: response to stimulus (GO:0050896);; biological process: multi-organism process (GO:0051704);; biological process: developmental process (GO:0032502);; biological process: cellular process (GO:0009987);; biological process: single-organi…	MAPK signaling pathway - plant (ko04016);; Plant hormone signal transduction (ko04075)
		Unigene_311057	ERF109	0.121364	2.40398	normal	0.00153039	4.78526	up	--	Ethylene-responsive transcription factor ERF109 OS=Arabidopsis thaliana OX=3702 GN=ERF109 PE=1 SV=1	hypothetical protein CFC21_071910 [Triticum aestivum]	--	--
		Unigene_172484	ERF110	0.000307222	-2.91145	down	0.479047	-1.40824	normal	--	Ethylene-responsive transcription factor ERF110 OS=Arabidopsis thaliana OX=3702 GN=ERF110 PE=2 SV=2	ethylene-responsive transcription factor ABR1-like [Panicum miliaceum]	biological process: response to stimulus (GO:0050896);; molecular function: nucleic acid binding transcription factor activity (GO:0001071);; biological process: biological regulation (GO:0065007);; biological process: multi-organism process (GO:0051704)	Spliceosome (ko03040)
		Unigene_303347	ERF110	0.00362509	-2.99913	down	0.523549	-1.21376	normal	--	Ethylene-responsive transcription factor ERF110 OS=Arabidopsis thaliana OX=3702 GN=ERF110 PE=2 SV=2	F-box domain containing protein [Hordeum vulgare]	biological process: response to stimulus (GO:0050896);; molecular function: nucleic acid binding transcription factor activity (GO:0001071);; biological process: biological regulation (GO:0065007);; biological process: multi-organism process (GO:0051704)	Spliceosome (ko03040)
		Unigene_591623	ERF117	0.238862	1.78755	normal	0.00507739	3.92288	up	AP2 domain	Ethylene-responsive transcription factor ERF117 OS=Arabidopsis thaliana OX=3702 GN=ERF117 PE=2 SV=1	dehydration-responsive element-binding protein 2D [Brachypodium distachyon]	molecular function: nucleic acid binding transcription factor activity (GO:0001071);; biological process: biological regulation (GO:0065007)	Plant-pathogen interaction (ko04626)
	Ethylene receptor (ETR)	Unigene_600915	ETR3	0.0143889	3.65416	normal	0.00347393	3.93641	up	Response regulator receiver domain;; His Kinase A (phospho-acceptor) domain;; Histidine kinase-, DNA gyrase B-, and HSP90-like ATPase	Ethylene receptor 3 OS=Oryza sativa subsp. japonica OX=39947 GN=ETR3 PE=2 SV=1	hypothetical protein CFC21_090264 [Triticum aestivum]	molecular function: catalytic activity (GO:0003824);; molecular function: signal transducer activity (GO:0004871);; molecular function: molecular transducer activity (GO:0060089);; biological process: metabolic process (GO:0008152);; biological process: cellular process (GO:0009987);; biological process: signaling (GO:0023052);; biological process: single-organism process (GO:0044699);; biologica…	MAPK signaling pathway - plant (ko04016);; Plant hormone signal transduction (ko04075)
Auxin (IAA)	Auxin response factor (ARF)	Unigene_020565	ARF21	0.0328533	2.38987	normal	0.000613505	4.51759	up	Auxin response factor;; B3 DNA binding domain;; AUX/IAA family	Auxin response factor 21 OS=Oryza sativa subsp. japonica OX=39947 GN=ARF21 PE=2 SV=2	hypothetical protein CFC21_108933 [Triticum aestivum]	molecular function: binding (GO:0005488);; molecular function: nucleic acid binding transcription factor activity (GO:0001071);; biological process: biological regulation (GO:0065007);; cellular component: cell (GO:0005623);; cellular component: cell part (GO:0044464);; cellular component: organelle (GO:0043226);; biological process: cellular process (GO:0009987);; biological process: signaling (…	Plant hormone signal transduction (ko04075)
		Unigene_074050	ARF23	0.156561	2.24836	normal	0.00384485	4.06691	up	Auxin response factor;; B3 DNA binding domain;; AUX/IAA family	Auxin response factor 23 OS=Oryza sativa subsp. japonica OX=39947 GN=ARF23 PE=1 SV=2	auxin response factor 23 isoform X1 [Brachypodium distachyon]	biological process: reproduction (GO:0000003);; biological process: response to stimulus (GO:0050896);; biological process: reproductive process (GO:0022414);; biological process: developmental process (GO:0032502);; molecular function: binding (GO:0005488);; molecular function: nucleic acid binding transcription factor activity (GO:0001071);; biological process: biological regulation (GO:0065007…	Plant hormone signal transduction (ko04075)
		Unigene_179927	ARF6	0.00407898	-2.21762	down	0.267743	-1.63614	normal	AUX/IAA family	Auxin response factor 6 OS=Oryza sativa subsp. indica OX=39946 GN=ARF6 PE=3 SV=1	hypothetical protein BRADI_3g04920v3 [Brachypodium distachyon]	--	Plant hormone signal transduction (ko04075)
		Unigene_199787	ARF4	0.0360245	3.08449	normal	0.000358885	4.95926	up	Auxin response factor;; B3 DNA binding domain;; AUX/IAA family	Auxin response factor 4 OS=Oryza sativa subsp. japonica OX=39947 GN=ARF4 PE=2 SV=1	predicted protein [Hordeum vulgare subsp. vulgare]	biological process: reproduction (GO:0000003);; biological process: response to stimulus (GO:0050896);; biological process: reproductive process (GO:0022414);; biological process: developmental process (GO:0032502);; molecular function: binding (GO:0005488);; molecular function: nucleic acid binding transcription factor activity (GO:0001071);; biological process: biological regulation (GO:0065007…	Plant hormone signal transduction (ko04075)
		Unigene_521230	ARF19	0.103113	2.41353	normal	0.00287683	4.25535	up	AUX/IAA family	Auxin response factor 19 OS=Oryza sativa subsp. japonica OX=39947 GN=ARF19 PE=2 SV=2	auxin response factor 19 [Brachypodium distachyon]	--	Plant hormone signal transduction (ko04075)
		Unigene_528827	ARF9	0.0870209	2.84814	normal	0.000196738	5.63181	up	Auxin response factor;; B3 DNA binding domain;; AUX/IAA family	Auxin response factor 9 OS=Oryza sativa subsp. japonica OX=39947 GN=ARF9 PE=2 SV=1	auxin response factor 9-like [Hordeum vulgare]	molecular function: binding (GO:0005488);; cellular component: cell (GO:0005623);; cellular component: organelle (GO:0043226);; cellular component: cell part (GO:0044464);; biological process: biological regulation (GO:0065007);; biological process: response to stimulus (GO:0050896)	Plant hormone signal transduction (ko04075)
		Unigene_528878	ARF16	0.0935481	2.46924	normal	0.00107421	4.62732	up	AUX/IAA family	Auxin response factor 16 OS=Oryza sativa subsp. indica OX=39946 GN=ARF16 PE=2 SV=1	auxin response factor 16 isoform X1 [Brachypodium distachyon]	molecular function: binding (GO:0005488);; molecular function: nucleic acid binding transcription factor activity (GO:0001071);; biological process: biological regulation (GO:0065007);; cellular component: cell (GO:0005623);; cellular component: cell part (GO:0044464);; cellular component: organelle (GO:0043226);; biological process: multicellular organismal process (GO:0032501);; biological proc…	Plant hormone signal transduction (ko04075)
		Unigene_179927	ARF6	0.00407898	-2.21762	down	0.267743	-1.63614	normal	AUX/IAA family	Auxin response factor 6 OS=Oryza sativa subsp. indica OX=39946 GN=ARF6 PE=3 SV=1	hypothetical protein BRADI_3g04920v3 [Brachypodium distachyon]	--	Plant hormone signal transduction (ko04075)
		Unigene_523038	ARF6	0.000664365	-1.55901	down	0.643976	-0.649436	normal	Auxin response factor;; B3 DNA binding domain	Auxin response factor 6 OS=Oryza sativa subsp. indica OX=39946 GN=ARF6 PE=3 SV=1	hypothetical protein CFC21_082789 [Triticum aestivum]	molecular function: binding (GO:0005488);; cellular component: cell (GO:0005623);; cellular component: organelle (GO:0043226);; cellular component: cell part (GO:0044464);; biological process: biological regulation (GO:0065007);; biological process: response to stimulus (GO:0050896)	Plant hormone signal transduction (ko04075)
		Unigene_022540	ARF19	0.00673902	-1.16873	down	0.990595	-0.0185069	normal	Auxin response factor;; B3 DNA binding domain	Auxin response factor 19 OS=Oryza sativa subsp. japonica OX=39947 GN=ARF19 PE=2 SV=2	auxin response factor 19 [Brachypodium distachyon]	molecular function: binding (GO:0005488);; cellular component: cell (GO:0005623);; cellular component: organelle (GO:0043226);; cellular component: cell part (GO:0044464);; biological process: biological regulation (GO:0065007);; biological process: response to stimulus (GO:0050896)	Plant hormone signal transduction (ko04075)
		Unigene_020565	ARF21	0.0328533	2.38987	normal	0.000613505	4.51759	up	Auxin response factor;; B3 DNA binding domain;; AUX/IAA family	Auxin response factor 21 OS=Oryza sativa subsp. japonica OX=39947 GN=ARF21 PE=2 SV=2	hypothetical protein CFC21_108933 [Triticum aestivum]	molecular function: binding (GO:0005488);; molecular function: nucleic acid binding transcription factor activity (GO:0001071);; biological process: biological regulation (GO:0065007);; cellular component: cell (GO:0005623);; cellular component: cell part (GO:0044464);; cellular component: organelle (GO:0043226);; biological process: cellular process (GO:0009987);; biological process: signaling (…	Plant hormone signal transduction (ko04075)
	Auxin(IAA)	Unigene_071434	IAA6	1.3868e-06	-2.07594	down	0.955412	-0.101045	normal	AUX/IAA family	Auxin-responsive protein IAA6 OS=Oryza sativa subsp. japonica OX=39947 GN=IAA6 PE=2 SV=1	auxin-responsive protein IAA6-like isoform X1 [Aegilops tauschii subsp. tauschii]	molecular function: nucleic acid binding transcription factor activity (GO:0001071);; biological process: biological regulation (GO:0065007);; biological process: response to stimulus (GO:0050896)	Plant hormone signal transduction (ko04075)
		Unigene_312890	IAA6	9.18877e-09	-1.81239	down	0.920114	-0.158333	normal	AUX/IAA family	Auxin-responsive protein IAA6 OS=Oryza sativa subsp. japonica OX=39947 GN=IAA6 PE=2 SV=1	auxin-responsive protein IAA6-like isoform X1 [Aegilops tauschii subsp. tauschii]	molecular function: nucleic acid binding transcription factor activity (GO:0001071);; biological process: biological regulation (GO:0065007);; biological process: response to stimulus (GO:0050896)	Plant hormone signal transduction (ko04075)
		Unigene_173795	IAA9	0.00217645	-2.31079	down	0.25401	-1.79326	normal	AUX/IAA family	Auxin-responsive protein IAA9 OS=Oryza sativa subsp. japonica OX=39947 GN=IAA9 PE=2 SV=1	Proliferating cell nuclear antigen [Hordeum vulgare]	molecular function: nucleic acid binding transcription factor activity (GO:0001071);; biological process: biological regulation (GO:0065007);; biological process: response to stimulus (GO:0050896)	Plant hormone signal transduction (ko04075)
		Unigene_023823	IAA18	0.00774839	-1.70173	down	0.734659	-0.694821	normal	AUX/IAA family	Auxin-responsive protein IAA18 OS=Oryza sativa subsp. japonica OX=39947 GN=IAA18 PE=2 SV=1	Auxin-responsive protein IAA18 [Dichanthelium oligosanthes]	biological process: response to stimulus (GO:0050896)	Plant hormone signal transduction (ko04075)
		Unigene_310775	IAA19	0.00751415	-1.5652	down	0.454841	-1.24295	normal	AUX/IAA family	Auxin-responsive protein IAA19 OS=Oryza sativa subsp. japonica OX=39947 GN=IAA19 PE=2 SV=1	unnamed protein product [Digitaria exilis]	cellular component: cell (GO:0005623);; cellular component: cell part (GO:0044464);; cellular component: organelle (GO:0043226);; biological process: response to stimulus (GO:0050896);; biological process: biological regulation (GO:0065007)	Plant hormone signal transduction (ko04075)
		Unigene_305692	IAA24	0.00583364	-1.3641	down	0.634476	-0.789218	normal	AUX/IAA family	Auxin-responsive protein IAA24 OS=Oryza sativa subsp. japonica OX=39947 GN=IAA24 PE=2 SV=1	hypothetical protein EJB05_15463, partial [Eragrostis curvula]	biological process: response to stimulus (GO:0050896)	Plant hormone signal transduction (ko04075)
	Auxin transporter-like protein	Unigene_015424	Os01g0856500	0.0252304	2.57381	normal	0.000273797	5.06967	up	Transmembrane amino acid transporter protein	Auxin transporter-like protein 1 OS=Oryza sativa subsp. japonica OX=39947 GN=Os01g0856500 PE=2 SV=2	auxin transporter-like protein 1 [Brachypodium distachyon]	biological process: single-organism process (GO:0044699);; biological process: localization (GO:0051179);; molecular function: transporter activity (GO:0005215);; cellular component: cell (GO:0005623);; cellular component: membrane (GO:0016020);; cellular component: cell part (GO:0044464);; biological process: biological regulation (GO:0065007);; biological process: multicellular organismal proce…	Plant hormone signal transduction (ko04075)
	Auxin-repressed 12.5 kDa protein	Unigene_170788	——	--	--	--	7.6826e-07	5.93347	up	Dormancy/auxin associated protein	Auxin-repressed 12.5 kDa protein OS=Fragaria ananassa OX=3747 PE=2 SV=1	unnamed protein product [Triticum turgidum subsp. durum]	--	--
		Unigene_180435	——	--	--	--	1.45973e-11	10.3582	up	Dormancy/auxin associated protein	Auxin-repressed 12.5 kDa protein OS=Fragaria ananassa OX=3747 PE=2 SV=1	dormancy-associated protein 1 [Brachypodium distachyon]	--	--
	Gretchen Hagen 3 (GH3)	Unigene_074692	GH3.12	0.0480722	2.1919	normal	0.00495232	3.82334	up	GH3 auxin-responsive promoter	Probable indole-3-acetic acid-amido synthetase GH3.12 OS=Oryza sativa subsp. japonica OX=39947 GN=GH3.12 PE=2 SV=1	unnamed protein product [Triticum turgidum subsp. durum]	cellular component: cell (GO:0005623);; cellular component: cell part (GO:0044464);; biological process: response to stimulus (GO:0050896);; cellular component: organelle (GO:0043226)	Plant hormone signal transduction (ko04075)
Gibberellin (GA)	Gibberellin 2-beta-dioxygenase (GA2OX)	Unigene_518654	GA2OX6	0.0516184	3.10729	normal	0.00085079	4.95325	up	non-haem dioxygenase in morphine synthesis N-terminal;; 2OG-Fe(II) oxygenase superfamily	Gibberellin 2-beta-dioxygenase 6 OS=Oryza sativa subsp. japonica OX=39947 GN=GA2OX6 PE=1 SV=1	gibberellin 2-beta-dioxygenase 8-like [Aegilops tauschii subsp. tauschii]	molecular function: catalytic activity (GO:0003824);; biological process: metabolic process (GO:0008152);; biological process: single-organism process (GO:0044699)	Diterpenoid biosynthesis (ko00904)
	Gibberellin receptor (GID)	Unigene_601553	GID1	0.0763521	2.86802	normal	0.0062808	3.8899	up	alpha/beta hydrolase fold;; Carboxylesterase family	Gibberellin receptor GID1 OS=Oryza sativa subsp. japonica OX=39947 GN=GID1 PE=1 SV=1	gibberellin-insensitive dwarf 1 [Lolium arundinaceum]	biological process: reproduction (GO:0000003);; biological process: response to stimulus (GO:0050896);; biological process: reproductive process (GO:0022414);; biological process: developmental process (GO:0032502);; molecular function: catalytic activity (GO:0003824);; molecular function: binding (GO:0005488);; cellular component: cell (GO:0005623);; cellular component: cell part (GO:0044464);; …	Plant hormone signal transduction (ko04075)
	DELLA	Unigene_003068	GAI	--	--	--	6.71033e-05	5.1902	up	GRAS domain family	DELLA protein GAI OS=Arabidopsis thaliana OX=3702 GN=GAI PE=1 SV=1	hypothetical protein CFC21_047356 [Triticum aestivum]	--	Plant hormone signal transduction (ko04075)
		Unigene_605746	RHT1	0.227667	2.02606	normal	0.00107693	4.67451	up	GRAS domain family;; Transcriptional regulator DELLA protein N terminal	DELLA protein RHT-1 OS=Triticum aestivum OX=4565 GN=RHT1 PE=1 SV=1	DELLA protein, partial [Psathyrostachys huashanica]	biological process: reproduction (GO:0000003);; biological process: cellular process (GO:0009987);; biological process: single-organism process (GO:0044699);; molecular function: binding (GO:0005488);; biological process: response to stimulus (GO:0050896);; molecular function: nucleic acid binding transcription factor activity (GO:0001071);; biological process: biological regulation (GO:0065007);…	Plant hormone signal transduction (ko04075)
Brassinosteroid (BR)	Brassinosteroid LRR receptor kinase BRI1/ BRL1	Unigene_530014	BRI1	0.0164868	2.73852	normal	0.00184966	3.69001	up	Leucine rich repeat;; Protein kinase domain;; Protein tyrosine and serine/threonine kinase;; Leucine Rich repeats (2 copies);; Leucine Rich Repeat;; Leucine Rich repeat	Brassinosteroid LRR receptor kinase BRI1 OS=Oryza sativa subsp. japonica OX=39947 GN=BRI1 PE=1 SV=1	hypothetical protein CFC21_041712 [Triticum aestivum]	biological process: reproduction (GO:0000003);; biological process: cellular process (GO:0009987);; biological process: cellular component organization or biogenesis (GO:0071840);; biological process: reproductive process (GO:0022414);; biological process: developmental process (GO:0032502);; molecular function: catalytic activity (GO:0003824);; biological process: metabolic process (GO:0008152);…	Plant hormone signal transduction (ko04075)
Jasmonic acid (JA)	Gretchen Hagen 3 (GH3)	Unigene_526120	GH3.5	0.00431908	3.9584	up	0.000124323	5.67558	up	GH3 auxin-responsive promoter;; GH3 auxin-responsive promoter	Jasmonoyl--L-amino acid synthetase GH3.5 OS=Oryza sativa subsp. japonica OX=39947 GN=GH3.5 PE=1 SV=1	unnamed protein product [Triticum turgidum subsp. durum]	biological process: response to stimulus (GO:0050896)	Plant hormone signal transduction (ko04075)

## Sheet: Stems
Hormone	Gene classification	ID	Gene name	S0_vs_S3_DESeq2_FDR	S0_vs_S3_DESeq2_log2FC	S0_vs_S3_regulated	S0_vs_S6_DESeq2_FDR	S0_vs_S6_DESeq2_log2FC	S0_vs_S6_regulated	Pfam_annotation	Swissprot_annotation	nr_annotation	GO_second_level_annotation	KEGG_pathway_annotation
Abscisic acid (ABA)	SNF1-Related Protein Kinase 2 (SnRK2)	Unigene_176072	SAPK2	--	--	--	1.47829e-07	9.23889	up	Protein kinase domain;; Protein tyrosine and serine/threonine kinase	Serine/threonine-protein kinase SAPK2 OS=Oryza sativa subsp. indica OX=39946 GN=SAPK2 PE=2 SV=2	serine/threonine-protein kinase SAPK2 [Aegilops tauschii subsp. tauschii]	biological process: response to stimulus (GO:0050896);; molecular function: catalytic activity (GO:0003824);; biological process: metabolic process (GO:0008152);; biological process: cellular process (GO:0009987);; molecular function: binding (GO:0005488);; cellular component: cell (GO:0005623);; cellular component: cell part (GO:0044464);; cellular component: organelle (GO:0043226);; biological …	MAPK signaling pathway - plant (ko04016);; Plant hormone signal transduction (ko04075)
		Unigene_314324	SAPK5	0.000472844	4.53968	up	0.00508836	3.02952	up	Protein kinase domain;; Protein tyrosine and serine/threonine kinase	Serine/threonine-protein kinase SAPK5 OS=Oryza sativa subsp. japonica OX=39947 GN=SAPK5 PE=2 SV=1	hypothetical protein CFC21_032944 [Triticum aestivum]	molecular function: catalytic activity (GO:0003824);; biological process: metabolic process (GO:0008152);; biological process: cellular process (GO:0009987);; molecular function: binding (GO:0005488);; cellular component: cell (GO:0005623);; cellular component: cell part (GO:0044464);; cellular component: organelle (GO:0043226);; biological process: signaling (GO:0023052);; biological process: si…	MAPK signaling pathway - plant (ko04016);; Plant hormone signal transduction (ko04075)
		Unigene_199725	SAPK8	0.000377645	4.64397	up	0.00186974	3.93133	up	Protein kinase domain;; Protein tyrosine and serine/threonine kinase	Serine/threonine-protein kinase SAPK8 OS=Oryza sativa subsp. japonica OX=39947 GN=SAPK8 PE=1 SV=1	predicted protein, partial [Hordeum vulgare subsp. vulgare]	biological process: response to stimulus (GO:0050896);; molecular function: catalytic activity (GO:0003824);; biological process: metabolic process (GO:0008152);; biological process: cellular process (GO:0009987);; molecular function: binding (GO:0005488);; cellular component: cell (GO:0005623);; cellular component: cell part (GO:0044464);; cellular component: organelle (GO:0043226);; biological …	MAPK signaling pathway - plant (ko04016);; Plant hormone signal transduction (ko04075)
	Protein Phosphatase 2C (PP2C)	Unigene_021757	Os03g0137200	--	--	--	0.000280585	5.7477	up	Protein phosphatase 2C;; Protein of unknown function (DUF1645)	Probable protein phosphatase 2C 28 OS=Oryza sativa subsp. japonica OX=39947 GN=Os03g0137200 PE=2 SV=1	predicted protein, partial [Hordeum vulgare subsp. vulgare]	molecular function: catalytic activity (GO:0003824)	--
		Unigene_075981	At2g20050/At2g20040	0.00104267	3.72824	up	0.0210002	2.95006	normal	Protein phosphatase 2C;; Cyclic nucleotide-binding domain;; Protein kinase domain	Protein phosphatase 2C and cyclic nucleotide-binding/kinase domain-containing protein OS=Arabidopsis thaliana OX=3702 GN=At2g20050/At2g20040 PE=2 SV=2	hypothetical protein CFC21_088190 [Triticum aestivum]	molecular function: catalytic activity (GO:0003824);; biological process: metabolic process (GO:0008152);; biological process: cellular process (GO:0009987);; molecular function: binding (GO:0005488);; cellular component: cell (GO:0005623);; cellular component: membrane (GO:0016020);; cellular component: cell part (GO:0044464)	MAPK signaling pathway - plant (ko04016);; Plant hormone signal transduction (ko04075)
		Unigene_317600	Os01g0552300	7.1192e-05	4.82571	up	0.00121342	4.01327	up	Protein phosphatase 2C;; Protein phosphatase 2C	Probable protein phosphatase 2C 5 OS=Oryza sativa subsp. japonica OX=39947 GN=Os01g0552300 PE=2 SV=1	probable protein phosphatase 2C 5 isoform X4 [Brachypodium distachyon]	molecular function: catalytic activity (GO:0003824);; cellular component: cell (GO:0005623);; cellular component: cell part (GO:0044464);; cellular component: organelle (GO:0043226);; cellular component: membrane-enclosed lumen (GO:0031974);; cellular component: organelle part (GO:0044422);; biological process: metabolic process (GO:0008152);; biological process: cellular process (GO:0009987);; b…	--
		Unigene_071749	Os02g0149800	--	--	--	1.18093e-07	7.83044	up	Protein phosphatase 2C	Probable protein phosphatase 2C 10 OS=Oryza sativa subsp. japonica OX=39947 GN=Os02g0149800 PE=2 SV=1	protein phosphatase 2C [Dasypyrum villosum]	molecular function: catalytic activity (GO:0003824);; biological process: metabolic process (GO:0008152);; biological process: cellular process (GO:0009987);; cellular component: extracellular region (GO:0005576);; cellular component: cell (GO:0005623);; cellular component: membrane (GO:0016020);; cellular component: cell part (GO:0044464);; biological process: response to stimulus (GO:0050896);;…	MAPK signaling pathway - plant (ko04016);; Plant hormone signal transduction (ko04075)
		Unigene_314629	Os02g0180000	0.00184684	3.39884	up	0.0237093	2.49824	normal	Protein phosphatase 2C	Probable protein phosphatase 2C 11 OS=Oryza sativa subsp. japonica OX=39947 GN=Os02g0180000 PE=2 SV=1	putative protein phosphatase 2C 11 [Triticum urartu]	biological process: response to stimulus (GO:0050896);; molecular function: catalytic activity (GO:0003824);; cellular component: cell (GO:0005623);; cellular component: membrane (GO:0016020);; cellular component: cell part (GO:0044464)	--
		Unigene_319253	Os03g0301700	0.000697419	4.54087	up	0.00334104	3.24833	up	Protein phosphatase 2C;; Stage II sporulation protein E (SpoIIE)	Probable protein phosphatase 2C 33 OS=Oryza sativa subsp. japonica OX=39947 GN=Os03g0301700 PE=2 SV=1	hypothetical protein CFC21_021588 [Triticum aestivum]	molecular function: catalytic activity (GO:0003824)	--
		Unigene_518180	Os03g0832400	5.28218e-07	7.52756	up	--	--	--	Protein kinase domain;; Protein phosphatase 2C;; Protein tyrosine and serine/threonine kinase	Probable protein phosphatase 2C 36 OS=Oryza sativa subsp. japonica OX=39947 GN=Os03g0832400 PE=2 SV=1	hypothetical protein CFC21_023410 [Triticum aestivum]	molecular function: catalytic activity (GO:0003824);; biological process: metabolic process (GO:0008152);; biological process: cellular process (GO:0009987);; molecular function: binding (GO:0005488)	MAPK signaling pathway - plant (ko04016);; Plant hormone signal transduction (ko04075)
		Unigene_074320	Os04g0403701	4.05333e-07	6.75359	up	6.73722e-07	6.34874	up	Protein phosphatase 2C	Probable protein phosphatase 2C 39 OS=Oryza sativa subsp. japonica OX=39947 GN=Os04g0403701 PE=2 SV=2	putative protein phosphatase 2C 39 [Hordeum vulgare]	molecular function: catalytic activity (GO:0003824)	--
		Unigene_067137	Os04g0449400	0.0142724	3.1135	normal	0.00532327	2.35975	up	Protein phosphatase 2C	Probable protein phosphatase 2C 40 OS=Oryza sativa subsp. japonica OX=39947 GN=Os04g0449400 PE=3 SV=3	probable protein phosphatase 2C 40 isoform X2 [Aegilops tauschii subsp. tauschii]	molecular function: catalytic activity (GO:0003824);; cellular component: cell (GO:0005623);; cellular component: cell part (GO:0044464)	--
		Unigene_069978	Os04g0659500	--	--	--	8.44502e-07	7.57173	up	Protein phosphatase 2C	Probable protein phosphatase 2C 45 OS=Oryza sativa subsp. japonica OX=39947 GN=Os04g0659500 PE=2 SV=2	probable protein phosphatase 2C 45 isoform X1 [Aegilops tauschii subsp. tauschii]	molecular function: catalytic activity (GO:0003824);; biological process: metabolic process (GO:0008152);; biological process: cellular process (GO:0009987);; cellular component: extracellular region (GO:0005576);; cellular component: cell (GO:0005623);; cellular component: membrane (GO:0016020);; cellular component: cell part (GO:0044464);; biological process: response to stimulus (GO:0050896);;…	MAPK signaling pathway - plant (ko04016);; Plant hormone signal transduction (ko04075)
		Unigene_195997	Os05g0587100	2.23491e-05	4.98587	up	3.03207e-05	4.00632	up	Protein phosphatase 2C	Probable protein phosphatase 2C 52 OS=Oryza sativa subsp. japonica OX=39947 GN=Os05g0587100 PE=2 SV=1	putative protein phosphatase 2C 52 [Hordeum vulgare]	molecular function: catalytic activity (GO:0003824)	--
		Unigene_321068	Os06g0651600	--	--	--	1.34715e-09	10.4647	up	Protein phosphatase 2C;; Stage II sporulation protein E (SpoIIE)	Probable protein phosphatase 2C 58 OS=Oryza sativa subsp. japonica OX=39947 GN=Os06g0651600 PE=2 SV=1	probable protein phosphatase 2C 58 [Aegilops tauschii subsp. tauschii]	biological process: response to stimulus (GO:0050896);; molecular function: catalytic activity (GO:0003824);; cellular component: cell (GO:0005623);; cellular component: membrane (GO:0016020);; cellular component: cell part (GO:0044464)	--
		Unigene_319411	Os06g0717800	--	--	--	3.34442e-08	9.72635	up	Protein phosphatase 2C	Probable protein phosphatase 2C 60 OS=Oryza sativa subsp. japonica OX=39947 GN=Os06g0717800 PE=2 SV=1	putative protein phosphatase 2C 60 [Hordeum vulgare]	molecular function: catalytic activity (GO:0003824);; cellular component: cell (GO:0005623);; cellular component: membrane (GO:0016020);; cellular component: cell part (GO:0044464)	--
		Unigene_191838	Os09g0325700	--	--	--	0.000907479	4.61822	up	Protein phosphatase 2C	Probable protein phosphatase 2C 68 OS=Oryza sativa subsp. japonica OX=39947 GN=Os09g0325700 PE=2 SV=2	hypothetical protein CFC21_071345 [Triticum aestivum]	molecular function: catalytic activity (GO:0003824)	MAPK signaling pathway - plant (ko04016);; Plant hormone signal transduction (ko04075)
		Unigene_602968	Os09g0558000	--	--	--	4.12638e-07	7.84948	up	Protein phosphatase 2C;; Protein phosphatase 2C;; Stage II sporulation protein E (SpoIIE)	Probable protein phosphatase 2C 70 OS=Oryza sativa subsp. japonica OX=39947 GN=Os09g0558000 PE=2 SV=2	probable protein phosphatase 2C 70 isoform X2 [Brachypodium distachyon]	biological process: response to stimulus (GO:0050896);; molecular function: catalytic activity (GO:0003824);; cellular component: cell (GO:0005623);; cellular component: membrane (GO:0016020);; cellular component: cell part (GO:0044464)	--
		Unigene_033911	PP2C06	0.000110168	5.11275	up	0.00406873	3.91685	up	Protein phosphatase 2C	Probable protein phosphatase 2C 6 OS=Oryza sativa subsp. japonica OX=39947 GN=PP2C06 PE=1 SV=1	hypothetical protein CFC21_041357 [Triticum aestivum]	molecular function: catalytic activity (GO:0003824);; biological process: metabolic process (GO:0008152);; biological process: cellular process (GO:0009987);; cellular component: cell (GO:0005623);; cellular component: cell part (GO:0044464);; cellular component: organelle (GO:0043226)	MAPK signaling pathway - plant (ko04016);; Plant hormone signal transduction (ko04075)
		Unigene_324879	PP2C06	--	--	--	2.83947e-10	9.78652	up	Protein phosphatase 2C	Probable protein phosphatase 2C 6 OS=Oryza sativa subsp. japonica OX=39947 GN=PP2C06 PE=1 SV=1	protein phosphatase 2C [Hordeum vulgare]	molecular function: catalytic activity (GO:0003824);; biological process: metabolic process (GO:0008152);; biological process: cellular process (GO:0009987);; cellular component: cell (GO:0005623);; cellular component: cell part (GO:0044464);; cellular component: organelle (GO:0043226)	MAPK signaling pathway - plant (ko04016);; Plant hormone signal transduction (ko04075)
		Unigene_199062	PP2C27	0.000536108	3.97812	up	0.0141455	2.46192	normal	Protein phosphatase 2C	Probable protein phosphatase 2C 27 OS=Arabidopsis thaliana OX=3702 GN=PP2C27 PE=2 SV=1	probable protein phosphatase 2C 47 isoform X1 [Brachypodium distachyon]	biological process: response to stimulus (GO:0050896);; molecular function: catalytic activity (GO:0003824);; cellular component: cell (GO:0005623);; cellular component: cell part (GO:0044464);; cellular component: organelle (GO:0043226);; biological process: biological regulation (GO:0065007);; biological process: cellular process (GO:0009987)	--
		Unigene_312867	PP2C30	--	--	--	5.89114e-05	6.91403	up	Protein phosphatase 2C	Probable protein phosphatase 2C 30 OS=Oryza sativa subsp. japonica OX=39947 GN=PP2C30 PE=1 SV=1	probable protein phosphatase 2C 30 [Brachypodium distachyon]	biological process: response to stimulus (GO:0050896);; molecular function: catalytic activity (GO:0003824);; cellular component: cell (GO:0005623);; cellular component: cell part (GO:0044464);; cellular component: organelle (GO:0043226);; biological process: cellular process (GO:0009987);; biological process: signaling (GO:0023052);; biological process: single-organism process (GO:0044699);; bio…	MAPK signaling pathway - plant (ko04016);; Plant hormone signal transduction (ko04075)
		Unigene_073489	XB15	--	--	--	4.64023e-06	8.46057	up	Protein phosphatase 2C	Protein phosphatase 2C 35 OS=Oryza sativa subsp. japonica OX=39947 GN=XB15 PE=1 SV=1	protein phosphatase 2C 35 [Panicum hallii]	molecular function: catalytic activity (GO:0003824);; cellular component: cell (GO:0005623);; cellular component: membrane (GO:0016020);; cellular component: cell part (GO:0044464);; biological process: multicellular organismal process (GO:0032501);; biological process: developmental process (GO:0032502);; biological process: single-organism process (GO:0044699)	--
		Unigene_198956	XB15	0.000295062	-3.73255	down	0.00373118	-2.66536	down	Protein phosphatase 2C	Protein phosphatase 2C 35 OS=Oryza sativa subsp. japonica OX=39947 GN=XB15 PE=1 SV=1	unnamed protein product [Triticum turgidum subsp. durum]	biological process: metabolic process (GO:0008152);; biological process: single-organism process (GO:0044699);; molecular function: catalytic activity (GO:0003824);; cellular component: cell (GO:0005623);; cellular component: cell part (GO:0044464);; biological process: cellular process (GO:0009987)	--
		Unigene_528394	XB15	3.50334e-05	-4.44383	down	0.000132944	-3.48599	down	Protein phosphatase 2C	Protein phosphatase 2C 35 OS=Oryza sativa subsp. japonica OX=39947 GN=XB15 PE=1 SV=1	hypothetical protein CFC21_080525 [Triticum aestivum]	molecular function: catalytic activity (GO:0003824);; cellular component: cell (GO:0005623);; cellular component: membrane (GO:0016020);; cellular component: cell part (GO:0044464);; biological process: multicellular organismal process (GO:0032501);; biological process: developmental process (GO:0032502);; biological process: single-organism process (GO:0044699)	--
Ethylene （ETH）	Ethylene-insensitive 3(EIN3)	Unigene_325364	EBF1	1.30554e-07	-6.64425	down	5.04402e-07	-6.05057	down	Leucine Rich repeat;; Leucine Rich repeats (2 copies);; Leucine Rich Repeat	EIN3-binding F-box protein 1 OS=Arabidopsis thaliana OX=3702 GN=EBF1 PE=1 SV=1	EIN3-binding F-box protein 1-like [Aegilops tauschii subsp. tauschii]	cellular component: cell (GO:0005623);; cellular component: macromolecular complex (GO:0032991);; cellular component: cell part (GO:0044464);; molecular function: binding (GO:0005488);; cellular component: organelle (GO:0043226);; biological process: metabolic process (GO:0008152);; biological process: cellular process (GO:0009987);; biological process: response to stimulus (GO:0050896);; biologi…	MAPK signaling pathway - plant (ko04016);; Plant hormone signal transduction (ko04075)
		Unigene_029462	EBF2	--	--	--	3.07041e-06	-5.55929	down	Leucine Rich repeat	EIN3-binding F-box protein 2 OS=Arabidopsis thaliana OX=3702 GN=EBF2 PE=1 SV=1	hypothetical protein CFC21_087984 [Triticum aestivum]	cellular component: cell (GO:0005623);; cellular component: macromolecular complex (GO:0032991);; cellular component: cell part (GO:0044464);; cellular component: organelle (GO:0043226);; biological process: metabolic process (GO:0008152);; biological process: cellular process (GO:0009987);; biological process: response to stimulus (GO:0050896);; biological process: biological regulation (GO:0065…	MAPK signaling pathway - plant (ko04016);; Plant hormone signal transduction (ko04075)
	Ethylene-insensitive	Unigene_506928	EIL2	0.0213475	-2.22958	normal	0.00842436	-1.96955	down	Ethylene insensitive 3	Protein ETHYLENE-INSENSITIVE 3-like 2 OS=Oryza sativa subsp. japonica OX=39947 GN=EIL2 PE=2 SV=2	hypothetical protein CFC21_021680 [Triticum aestivum]	cellular component: cell (GO:0005623);; cellular component: organelle (GO:0043226);; cellular component: cell part (GO:0044464)	MAPK signaling pathway - plant (ko04016);; Plant hormone signal transduction (ko04075)
		Unigene_199296	EIN2	0.00881402	3.2466	up	0.0269055	2.41674	normal	Natural resistance-associated macrophage protein	Protein ETHYLENE-INSENSITIVE 2 OS=Oryza sativa subsp. japonica OX=39947 GN=EIN2 PE=2 SV=1	protein ETHYLENE-INSENSITIVE 2 [Brachypodium distachyon]	biological process: cellular process (GO:0009987);; biological process: signaling (GO:0023052);; biological process: single-organism process (GO:0044699);; biological process: response to stimulus (GO:0050896);; biological process: biological regulation (GO:0065007);; biological process: developmental process (GO:0032502);; biological process: multi-organism process (GO:0051704);; biological proc…	MAPK signaling pathway - plant (ko04016);; Plant hormone signal transduction (ko04075)
	ethylene response sensor (ERS)	Unigene_074263	ERS1	3.64956e-11	9.52239	up	2.5928e-08	8.43279	up	Histidine kinase-, DNA gyrase B-, and HSP90-like ATPase;; GAF domain;; His Kinase A (phospho-acceptor) domain	Probable ethylene response sensor 1 OS=Oryza sativa subsp. indica OX=39946 GN=ERS1 PE=2 SV=1	ethylene receptor, partial [Avena fatua]	molecular function: catalytic activity (GO:0003824);; molecular function: signal transducer activity (GO:0004871);; molecular function: molecular transducer activity (GO:0060089);; biological process: metabolic process (GO:0008152);; biological process: cellular process (GO:0009987);; biological process: signaling (GO:0023052);; biological process: single-organism process (GO:0044699);; biologica…	MAPK signaling pathway - plant (ko04016);; Plant hormone signal transduction (ko04075)
		Unigene_198433	ERS2	--	--	--	0.00277948	4.6565	up	Histidine kinase-, DNA gyrase B-, and HSP90-like ATPase;; GAF domain;; His Kinase A (phospho-acceptor) domain	Probable ethylene response sensor 2 OS=Oryza sativa subsp. japonica OX=39947 GN=ERS2 PE=2 SV=1	ethylene receptor, partial [Avena fatua]	molecular function: catalytic activity (GO:0003824);; molecular function: signal transducer activity (GO:0004871);; molecular function: molecular transducer activity (GO:0060089);; biological process: metabolic process (GO:0008152);; biological process: cellular process (GO:0009987);; biological process: signaling (GO:0023052);; biological process: single-organism process (GO:0044699);; biologica…	MAPK signaling pathway - plant (ko04016);; Plant hormone signal transduction (ko04075)
		Unigene_325173	ERS2	--	--	--	4.89478e-08	9.65153	up	Histidine kinase-, DNA gyrase B-, and HSP90-like ATPase;; GAF domain;; His Kinase A (phospho-acceptor) domain	Probable ethylene response sensor 2 OS=Oryza sativa subsp. japonica OX=39947 GN=ERS2 PE=2 SV=1	ethylene receptor, partial [Avena fatua]	molecular function: catalytic activity (GO:0003824);; molecular function: signal transducer activity (GO:0004871);; molecular function: molecular transducer activity (GO:0060089);; biological process: metabolic process (GO:0008152);; biological process: cellular process (GO:0009987);; biological process: signaling (GO:0023052);; biological process: single-organism process (GO:0044699);; biologica…	MAPK signaling pathway - plant (ko04016);; Plant hormone signal transduction (ko04075)
	Ethylene receptor (ETR)	Unigene_005232	ETR2	0.00123683	3.95324	up	0.00239961	3.16865	up	Response regulator receiver domain;; GAF domain	Ethylene receptor 2 OS=Oryza sativa subsp. japonica OX=39947 GN=ETR2 PE=1 SV=1	ethylene receptor, partial [Avena fatua]	biological process: cellular process (GO:0009987);; biological process: signaling (GO:0023052);; biological process: single-organism process (GO:0044699);; biological process: response to stimulus (GO:0050896);; biological process: biological regulation (GO:0065007);; molecular function: catalytic activity (GO:0003824);; biological process: metabolic process (GO:0008152);; molecular function: bin…	MAPK signaling pathway - plant (ko04016);; Plant hormone signal transduction (ko04075)
	Ethylene response factor(ERF)	Unigene_518350	ERF2	6.03697e-06	-5.04974	down	7.75136e-05	-3.87811	down	AP2 domain	Ethylene-responsive transcription factor 2 OS=Nicotiana sylvestris OX=4096 GN=ERF2 PE=2 SV=1	ethylene-responsive factor [Thinopyrum intermedium]	biological process: cellular process (GO:0009987);; biological process: signaling (GO:0023052);; biological process: single-organism process (GO:0044699);; biological process: response to stimulus (GO:0050896);; biological process: biological regulation (GO:0065007);; biological process: immune system process (GO:0002376);; molecular function: nucleic acid binding transcription factor activity (G…	--
		Unigene_603633	ERF2	0.00702457	-4.41135	down	0.849986	-0.387941	normal	AP2 domain	Ethylene-responsive transcription factor 2 OS=Nicotiana sylvestris OX=4096 GN=ERF2 PE=2 SV=1	pathogen-inducible transcription factor ERF3 [Triticum aestivum]	biological process: cellular process (GO:0009987);; biological process: signaling (GO:0023052);; biological process: single-organism process (GO:0044699);; biological process: response to stimulus (GO:0050896);; biological process: biological regulation (GO:0065007);; biological process: immune system process (GO:0002376);; molecular function: nucleic acid binding transcription factor activity (G…	--
		Unigene_514995	ERF3	3.6433e-05	-5.4469	down	0.00722895	-4.20528	down	AP2 domain	Ethylene-responsive transcription factor 3 OS=Nicotiana tabacum OX=4097 GN=ERF3 PE=2 SV=1	ethylene-responsive transcription factor 3-like [Aegilops tauschii subsp. tauschii]	molecular function: nucleic acid binding transcription factor activity (GO:0001071);; biological process: biological regulation (GO:0065007)	--
		Unigene_064917	ERF4	0.000315783	-3.9302	down	0.0133391	-2.87444	normal	AP2 domain	Ethylene-responsive transcription factor 4 OS=Arabidopsis thaliana OX=3702 GN=ERF4 PE=1 SV=1	ethylene-responsive factor-like transcription factor ERFL2b [Hordeum vulgare]	molecular function: nucleic acid binding transcription factor activity (GO:0001071);; biological process: biological regulation (GO:0065007)	--
		Unigene_597634	ERF4	0.00529487	-3.46884	down	0.138671	-2.62304	normal	--	Ethylene-responsive transcription factor 4 OS=Arabidopsis thaliana OX=3702 GN=ERF4 PE=1 SV=1	ethylene-responsive transcription factor 3 [Agropyron mongolicum]	--	MAPK signaling pathway - plant (ko04016);; Plant hormone signal transduction (ko04075)
		Unigene_322958	ERF4	0.0034256	3.95841	up	0.0417143	2.40403	normal	AP2 domain	Ethylene-responsive transcription factor 4 OS=Nicotiana sylvestris OX=4096 GN=ERF4 PE=2 SV=1	--	molecular function: nucleic acid binding transcription factor activity (GO:0001071);; biological process: biological regulation (GO:0065007)	--
		Unigene_593418	ERF4	0.000310589	-4.8985	down	0.175271	-1.83654	normal	AP2 domain	Ethylene-responsive transcription factor 4 OS=Nicotiana tabacum OX=4097 GN=ERF4 PE=1 SV=1	ethylene-responsive transcription factor 4 [Setaria italica]	molecular function: nucleic acid binding transcription factor activity (GO:0001071);; biological process: biological regulation (GO:0065007)	--
		Unigene_598818	ERF9	0.00390535	-2.9785	down	0.829496	-0.313587	normal	AP2 domain	Ethylene-responsive transcription factor 9 OS=Arabidopsis thaliana OX=3702 GN=ERF9 PE=1 SV=1	ethylene-responsive transcription factor 4-like [Panicum miliaceum]	molecular function: nucleic acid binding transcription factor activity (GO:0001071);; biological process: biological regulation (GO:0065007)	MAPK signaling pathway - plant (ko04016);; Plant hormone signal transduction (ko04075)
		Unigene_599671	ERF013	0.00683034	-3.85478	down	0.715355	0.762779	normal	AP2 domain	Ethylene-responsive transcription factor ERF013 OS=Arabidopsis thaliana OX=3702 GN=ERF013 PE=2 SV=1	ethylene-responsive transcription factor ERF014-like [Aegilops tauschii subsp. tauschii]	molecular function: binding (GO:0005488);; biological process: response to stimulus (GO:0050896);; biological process: immune system process (GO:0002376);; biological process: biological regulation (GO:0065007);; molecular function: nucleic acid binding transcription factor activity (GO:0001071);; cellular component: cell (GO:0005623);; cellular component: cell part (GO:0044464);; cellular compon…	--
		Unigene_515126	ERF020	6.68246e-06	-6.89993	down	1.27109e-07	-8.20722	down	AP2 domain	Ethylene-responsive transcription factor ERF020 OS=Arabidopsis thaliana OX=3702 GN=ERF020 PE=2 SV=1	hypothetical protein D1007_13819 [Hordeum vulgare]	biological process: response to stimulus (GO:0050896);; molecular function: nucleic acid binding transcription factor activity (GO:0001071);; biological process: biological regulation (GO:0065007);; cellular component: cell (GO:0005623);; cellular component: cell part (GO:0044464);; cellular component: organelle (GO:0043226);; biological process: cellular process (GO:0009987)	Plant hormone signal transduction (ko04075)
		Unigene_040928	ERF025	8.38945e-10	-7.73748	down	0.0059768	-3.64933	down	AP2 domain	Ethylene-responsive transcription factor ERF025 OS=Arabidopsis thaliana OX=3702 GN=ERF025 PE=2 SV=1	ethylene-responsive transcription factor ERF027-like [Aegilops tauschii subsp. tauschii]	molecular function: binding (GO:0005488);; molecular function: nucleic acid binding transcription factor activity (GO:0001071);; biological process: biological regulation (GO:0065007);; biological process: metabolic process (GO:0008152);; biological process: cellular process (GO:0009987);; biological process: single-organism process (GO:0044699);; biological process: response to stimulus (GO:0050…	--
		Unigene_592685	ERF025	6.9085e-07	-5.94002	down	0.0819055	-2.07316	normal	AP2 domain	Ethylene-responsive transcription factor ERF025 OS=Arabidopsis thaliana OX=3702 GN=ERF025 PE=2 SV=1	hypothetical protein CFC21_024786 [Triticum aestivum]	molecular function: nucleic acid binding transcription factor activity (GO:0001071);; biological process: biological regulation (GO:0065007)	Plant hormone signal transduction (ko04075)
		Unigene_185468	ERF053	--	--	--	6.47239e-05	4.77315	up	AP2 domain	Ethylene-responsive transcription factor ERF053 OS=Arabidopsis thaliana OX=3702 GN=ERF053 PE=1 SV=1	--	molecular function: nucleic acid binding transcription factor activity (GO:0001071);; biological process: biological regulation (GO:0065007)	Plant hormone signal transduction (ko04075)
		Unigene_501422	ERF073	0.00832258	-3.34313	down	0.199443	-1.86882	normal	AP2 domain	Ethylene-responsive transcription factor ERF073 OS=Arabidopsis thaliana OX=3702 GN=ERF073 PE=1 SV=1	hypothetical protein CFC21_050838 [Triticum aestivum]	--	--
		Unigene_002440	ERF109	1.21907e-06	-5.76046	down	0.00400234	-3.73344	down	AP2 domain	Ethylene-responsive transcription factor ERF109 OS=Arabidopsis thaliana OX=3702 GN=ERF109 PE=1 SV=1	root abundant factor [Hordeum vulgare]	molecular function: nucleic acid binding transcription factor activity (GO:0001071);; biological process: biological regulation (GO:0065007)	Plant hormone signal transduction (ko04075)
		Unigene_173246	ERF109	0.00019272	-5.17222	down	7.02628e-05	-4.08704	down	--	Ethylene-responsive transcription factor ERF109 OS=Arabidopsis thaliana OX=3702 GN=ERF109 PE=1 SV=1	ethylene-responsive transcription factor ERF109 [Brachypodium distachyon]	molecular function: nucleic acid binding transcription factor activity (GO:0001071);; biological process: biological regulation (GO:0065007);; biological process: response to stimulus (GO:0050896);; biological process: multi-organism process (GO:0051704);; biological process: developmental process (GO:0032502);; biological process: cellular process (GO:0009987);; biological process: single-organi…	--
		Unigene_593227	ERF110	7.72223e-08	-7.03508	down	0.228386	-2.14478	normal	AP2 domain	Ethylene-responsive transcription factor ERF110 OS=Arabidopsis thaliana OX=3702 GN=ERF110 PE=2 SV=2	ethylene-responsive transcription factor ERF109-like [Aegilops tauschii subsp. tauschii]	molecular function: nucleic acid binding transcription factor activity (GO:0001071);; biological process: biological regulation (GO:0065007)	--
Auxin （IAA）	Auxin response factor (ARF)	Unigene_053395	ARF2	--	--	--	0.000218179	3.88078	up	--	Auxin response factor 2 OS=Arabidopsis thaliana OX=3702 GN=ARF2 PE=1 SV=2	unnamed protein product [Triticum turgidum subsp. durum]	--	Plant hormone signal transduction (ko04075)
		Unigene_075404	ARF7	0.0001529	5.003	up	0.0018642	4.06623	up	Auxin response factor;; B3 DNA binding domain;; AUX/IAA family	Auxin response factor 7 OS=Oryza sativa subsp. japonica OX=39947 GN=ARF7 PE=2 SV=1	auxin response factor 7 [Brachypodium distachyon]	molecular function: binding (GO:0005488);; cellular component: cell (GO:0005623);; cellular component: organelle (GO:0043226);; cellular component: cell part (GO:0044464);; biological process: biological regulation (GO:0065007);; biological process: response to stimulus (GO:0050896)	Plant hormone signal transduction (ko04075)
		Unigene_317228	ARF12	--	--	--	0.000168465	3.65416	up	AUX/IAA family	Auxin response factor 12 OS=Oryza sativa subsp. indica OX=39946 GN=ARF12 PE=3 SV=1	unnamed protein product [Triticum turgidum subsp. durum]	biological process: reproduction (GO:0000003);; biological process: reproductive process (GO:0022414);; biological process: developmental process (GO:0032502);; molecular function: binding (GO:0005488);; molecular function: nucleic acid binding transcription factor activity (GO:0001071);; biological process: biological regulation (GO:0065007);; cellular component: cell (GO:0005623);; cellular com…	Plant hormone signal transduction (ko04075)
		Unigene_072922	ARF14	--	--	--	0.00595256	3.89673	up	Auxin response factor;; B3 DNA binding domain	Auxin response factor 14 OS=Oryza sativa subsp. japonica OX=39947 GN=ARF14 PE=2 SV=2	hypothetical protein CFC21_003433 [Triticum aestivum]	biological process: reproduction (GO:0000003);; biological process: cellular process (GO:0009987);; biological process: developmental process (GO:0032502);; biological process: single-organism process (GO:0044699);; biological process: reproductive process (GO:0022414);; molecular function: binding (GO:0005488);; molecular function: nucleic acid binding transcription factor activity (GO:0001071);…	Plant hormone signal transduction (ko04075)
		Unigene_529146	ARF14	5.17273e-08	7.4973	up	7.08816e-06	5.99583	up	Auxin response factor;; B3 DNA binding domain	Auxin response factor 14 OS=Oryza sativa subsp. japonica OX=39947 GN=ARF14 PE=2 SV=2	predicted protein [Hordeum vulgare subsp. vulgare]	biological process: reproduction (GO:0000003);; biological process: cellular process (GO:0009987);; biological process: developmental process (GO:0032502);; biological process: single-organism process (GO:0044699);; biological process: reproductive process (GO:0022414);; molecular function: binding (GO:0005488);; molecular function: nucleic acid binding transcription factor activity (GO:0001071);…	Plant hormone signal transduction (ko04075)
		Unigene_029103	ARF15	0.000124944	5.27956	up	0.00150649	4.45786	up	Auxin response factor;; B3 DNA binding domain	Auxin response factor 15 OS=Oryza sativa subsp. japonica OX=39947 GN=ARF15 PE=2 SV=1	ARF protein [Phyllostachys edulis]	biological process: reproduction (GO:0000003);; biological process: cellular process (GO:0009987);; biological process: developmental process (GO:0032502);; biological process: single-organism process (GO:0044699);; biological process: reproductive process (GO:0022414);; molecular function: binding (GO:0005488);; molecular function: nucleic acid binding transcription factor activity (GO:0001071);…	Plant hormone signal transduction (ko04075)
		Unigene_043914	ARF18	0.0011773	4.04372	up	0.00261915	3.5222	up	Auxin response factor;; B3 DNA binding domain	Auxin response factor 18 OS=Oryza sativa subsp. japonica OX=39947 GN=ARF18 PE=2 SV=1	auxin response factor 22-like [Aegilops tauschii subsp. tauschii]	molecular function: binding (GO:0005488);; cellular component: cell (GO:0005623);; cellular component: organelle (GO:0043226);; cellular component: cell part (GO:0044464);; biological process: biological regulation (GO:0065007);; biological process: response to stimulus (GO:0050896)	Plant hormone signal transduction (ko04075)
		Unigene_051338	ARF18	3.42797e-06	5.50565	up	0.000943275	4.04539	up	Auxin response factor;; B3 DNA binding domain	Auxin response factor 18 OS=Oryza sativa subsp. japonica OX=39947 GN=ARF18 PE=2 SV=1	hypothetical protein CFC21_110844 [Triticum aestivum]	molecular function: binding (GO:0005488);; cellular component: cell (GO:0005623);; cellular component: organelle (GO:0043226);; cellular component: cell part (GO:0044464);; biological process: biological regulation (GO:0065007);; biological process: response to stimulus (GO:0050896)	Plant hormone signal transduction (ko04075)
		Unigene_075633	ARF18	4.98921e-05	4.77156	up	0.00215654	4.12988	up	Auxin response factor;; B3 DNA binding domain	Auxin response factor 18 OS=Oryza sativa subsp. japonica OX=39947 GN=ARF18 PE=2 SV=1	hypothetical protein CFC21_110844 [Triticum aestivum]	molecular function: binding (GO:0005488);; cellular component: cell (GO:0005623);; cellular component: organelle (GO:0043226);; cellular component: cell part (GO:0044464);; biological process: biological regulation (GO:0065007);; biological process: response to stimulus (GO:0050896)	Plant hormone signal transduction (ko04075)
		Unigene_073826	ARF21	1.8506e-05	6.19206	up	--	--	--	AUX/IAA family;; Sugar (and other) transporter;; Major Facilitator Superfamily;; Sugar-tranasporters, 12 TM	Auxin response factor 21 OS=Oryza sativa subsp. japonica OX=39947 GN=ARF21 PE=2 SV=2	unnamed protein product [Triticum turgidum subsp. durum]	molecular function: binding (GO:0005488);; molecular function: nucleic acid binding transcription factor activity (GO:0001071);; biological process: biological regulation (GO:0065007);; cellular component: cell (GO:0005623);; cellular component: cell part (GO:0044464);; cellular component: organelle (GO:0043226);; biological process: cellular process (GO:0009987);; biological process: signaling (…	Plant hormone signal transduction (ko04075)
		Unigene_325881	ARF21	6.28382e-07	7.65723	up	8.90177e-05	6.30962	up	Auxin response factor;; B3 DNA binding domain;; AUX/IAA family	Auxin response factor 21 OS=Oryza sativa subsp. japonica OX=39947 GN=ARF21 PE=2 SV=2	hypothetical protein CFC21_097548 [Triticum aestivum]	molecular function: binding (GO:0005488);; molecular function: nucleic acid binding transcription factor activity (GO:0001071);; biological process: biological regulation (GO:0065007);; cellular component: cell (GO:0005623);; cellular component: cell part (GO:0044464);; cellular component: organelle (GO:0043226);; biological process: cellular process (GO:0009987);; biological process: signaling (…	Plant hormone signal transduction (ko04075)
		Unigene_323896	ARF23	0.000192223	5.39316	up	0.00210338	4.56546	up	Auxin response factor;; B3 DNA binding domain;; AUX/IAA family	Auxin response factor 23 OS=Oryza sativa subsp. indica OX=39946 GN=ARF23 PE=2 SV=1	auxin response factor 23 isoform X1 [Brachypodium distachyon]	biological process: reproduction (GO:0000003);; biological process: response to stimulus (GO:0050896);; biological process: reproductive process (GO:0022414);; biological process: developmental process (GO:0032502);; molecular function: binding (GO:0005488);; molecular function: nucleic acid binding transcription factor activity (GO:0001071);; biological process: biological regulation (GO:0065007…	Plant hormone signal transduction (ko04075)
	Auxin (IAA)	Unigene_172620	IAA3	--	--	--	0.000200696	5.87551	up	AUX/IAA family	Auxin-responsive protein IAA3 OS=Oryza sativa subsp. japonica OX=39947 GN=IAA3 PE=2 SV=1	auxin-responsive protein IAA3 [Hordeum vulgare]	molecular function: nucleic acid binding transcription factor activity (GO:0001071);; biological process: biological regulation (GO:0065007);; biological process: response to stimulus (GO:0050896)	Plant hormone signal transduction (ko04075)
		Unigene_042910	IAA6	0.175492	-1.9476	normal	1.60386e-05	-4.22454	down	AUX/IAA family	Auxin-responsive protein IAA6 OS=Oryza sativa subsp. japonica OX=39947 GN=IAA6 PE=2 SV=1	auxin-responsive protein IAA6-like isoform X1 [Aegilops tauschii subsp. tauschii]	molecular function: nucleic acid binding transcription factor activity (GO:0001071);; biological process: biological regulation (GO:0065007);; biological process: response to stimulus (GO:0050896)	Plant hormone signal transduction (ko04075)
		Unigene_595988	IAA14	5.81894e-05	5.00183	up	0.00140208	3.80248	up	AUX/IAA family	Auxin-responsive protein IAA14 OS=Oryza sativa subsp. japonica OX=39947 GN=IAA14 PE=2 SV=1	Auxin-responsive protein IAA14 [Triticum urartu]	biological process: response to stimulus (GO:0050896)	Plant hormone signal transduction (ko04075)
		Unigene_051750	IAA15	0.00105621	4.5044	up	0.00371869	3.78655	up	Myb/SANT-like DNA-binding domain;; AUX/IAA family	Auxin-responsive protein IAA15 OS=Oryza sativa subsp. japonica OX=39947 GN=IAA15 PE=2 SV=1	hypothetical protein CFC21_069205 [Triticum aestivum]	--	Plant hormone signal transduction (ko04075)
		Unigene_313100	IAA17	6.16009e-06	6.59165	up	0.000557053	5.33473	up	AUX/IAA family	Auxin-responsive protein IAA17 OS=Oryza sativa subsp. japonica OX=39947 GN=IAA17 PE=2 SV=1	auxin-responsive protein IAA17 [Brachypodium distachyon]	molecular function: nucleic acid binding transcription factor activity (GO:0001071);; biological process: biological regulation (GO:0065007);; biological process: response to stimulus (GO:0050896)	Plant hormone signal transduction (ko04075)
		Unigene_518704	IAA19	0.00623287	-2.99659	down	0.0442616	-2.14223	normal	No apical meristem (NAM) protein	Auxin-responsive protein IAA19 OS=Oryza sativa subsp. japonica OX=39947 GN=IAA19 PE=2 SV=1	uncharacterized protein LOC100830721 [Brachypodium distachyon]	molecular function: binding (GO:0005488);; biological process: biological regulation (GO:0065007)	Glycine, serine and threonine metabolism (ko00260);; Monobactam biosynthesis (ko00261);; Cysteine and methionine metabolism (ko00270);; Lysine biosynthesis (ko00300);; 2-Oxocarboxylic acid metabolism (ko01210);; Biosynthesis of amino acids (ko01230)
		Unigene_042172	IAA23	0.000553526	4.63069	up	0.00212358	3.93202	up	AUX/IAA family	Auxin-responsive protein IAA23 OS=Oryza sativa subsp. japonica OX=39947 GN=IAA23 PE=2 SV=1	hypothetical protein CFC21_098310 [Triticum aestivum]	molecular function: nucleic acid binding transcription factor activity (GO:0001071);; biological process: biological regulation (GO:0065007);; molecular function: binding (GO:0005488);; cellular component: cell (GO:0005623);; cellular component: cell part (GO:0044464);; cellular component: organelle (GO:0043226);; biological process: cellular process (GO:0009987);; biological process: signaling (…	Plant hormone signal transduction (ko04075)
		Unigene_305692	IAA24	3.95486e-05	5.22436	up	0.000551063	3.98515	up	AUX/IAA family	Auxin-responsive protein IAA24 OS=Oryza sativa subsp. japonica OX=39947 GN=IAA24 PE=2 SV=1	hypothetical protein EJB05_15463, partial [Eragrostis curvula]	biological process: response to stimulus (GO:0050896)	Plant hormone signal transduction (ko04075)
		Unigene_312572	IAA31	--	--	--	1.26154e-07	8.1234	up	AUX/IAA family	Auxin-responsive protein IAA31 OS=Oryza sativa subsp. japonica OX=39947 GN=IAA31 PE=2 SV=1	predicted protein [Hordeum vulgare subsp. vulgare]	--	Plant hormone signal transduction (ko04075)
	Auxin transporter-like protein	Unigene_075046	Os01g0856500	4.8827e-05	5.56227	up	0.000593304	4.64269	up	Transmembrane amino acid transporter protein	Auxin transporter-like protein 1 OS=Oryza sativa subsp. japonica OX=39947 GN=Os01g0856500 PE=2 SV=2	auxin transporter-like protein 1 [Brachypodium distachyon]	biological process: single-organism process (GO:0044699);; biological process: localization (GO:0051179);; molecular function: transporter activity (GO:0005215);; cellular component: cell (GO:0005623);; cellular component: membrane (GO:0016020);; cellular component: cell part (GO:0044464);; biological process: biological regulation (GO:0065007);; biological process: multicellular organismal proce…	Plant hormone signal transduction (ko04075)
	Auxin-responsive protein SAUR	Unigene_505762	SAUR39	0.00469217	-4.21613	down	0.000785541	-5.02056	down	Auxin responsive protein	Auxin-responsive protein SAUR36 OS=Oryza sativa subsp. japonica OX=39947 GN=SAUR39 PE=2 SV=1	hypothetical protein CFC21_073027 [Triticum aestivum]	cellular component: cell (GO:0005623);; cellular component: cell part (GO:0044464);; biological process: response to stimulus (GO:0050896);; biological process: biological regulation (GO:0065007)	Plant hormone signal transduction (ko04075)
		Unigene_509769	SAUR71	7.23815e-07	-8.6989	down	9.72942e-05	-4.9255	down	Auxin responsive protein	Auxin-responsive protein SAUR71 OS=Arabidopsis thaliana OX=3702 GN=SAUR71 PE=2 SV=1	auxin-responsive protein SAUR71-like [Aegilops tauschii subsp. tauschii]	biological process: response to stimulus (GO:0050896)	Plant hormone signal transduction (ko04075)
	Auxin-repressed 12.5 kDa protein	Unigene_180435	——	0.539337	0.924539	normal	0.00381345	-3.88522	down	Dormancy/auxin associated protein	Auxin-repressed 12.5 kDa protein OS=Fragaria ananassa OX=3747 PE=2 SV=1	dormancy-associated protein 1 [Brachypodium distachyon]	--	--
Gibberellin (GA)	Gibberellin-regulated protein	Unigene_584769	GASA5	--	--	--	0.00355862	3.89686	up	Gibberellin regulated protein	Gibberellin-regulated protein 5 OS=Arabidopsis thaliana OX=3702 GN=GASA5 PE=2 SV=1	hypothetical protein BRADI_1g43851v3 [Brachypodium distachyon]	biological process: response to stimulus (GO:0050896);; cellular component: cell junction (GO:0030054);; cellular component: symplast (GO:0055044)	Glycosylphosphatidylinositol (GPI)-anchor biosynthesis (ko00563)
	Gibberellin 2-beta-dioxygenase (GA2OX)	Unigene_518654	GA2OX6	3.34852e-12	-9.02615	down	0.00257188	-4.10691	down	non-haem dioxygenase in morphine synthesis N-terminal;; 2OG-Fe(II) oxygenase superfamily	Gibberellin 2-beta-dioxygenase 6 OS=Oryza sativa subsp. japonica OX=39947 GN=GA2OX6 PE=1 SV=1	gibberellin 2-beta-dioxygenase 8-like [Aegilops tauschii subsp. tauschii]	molecular function: catalytic activity (GO:0003824);; biological process: metabolic process (GO:0008152);; biological process: single-organism process (GO:0044699)	Diterpenoid biosynthesis (ko00904)
	Gibberellin receptor (GID)	Unigene_073212	GID1	--	--	--	0.000106478	6.18141	up	alpha/beta hydrolase fold;; Carboxylesterase family	Gibberellin receptor GID1 OS=Oryza sativa subsp. japonica OX=39947 GN=GID1 PE=1 SV=1	gibberellin-insensitive dwarf 1 [Lolium arundinaceum]	biological process: reproduction (GO:0000003);; biological process: response to stimulus (GO:0050896);; biological process: reproductive process (GO:0022414);; biological process: developmental process (GO:0032502);; molecular function: catalytic activity (GO:0003824);; molecular function: binding (GO:0005488);; cellular component: cell (GO:0005623);; cellular component: cell part (GO:0044464);; …	Plant hormone signal transduction (ko04075)
	DELLA	Unigene_321259	SLN1	0.00988109	4.23945	up	0.0411087	3.18288	normal	GRAS domain family	DELLA protein SLN1 OS=Hordeum vulgare OX=4513 GN=SLN1 PE=1 SV=1	DELLA [Lolium perenne]	biological process: reproduction (GO:0000003);; biological process: cellular process (GO:0009987);; biological process: single-organism process (GO:0044699);; molecular function: binding (GO:0005488);; biological process: response to stimulus (GO:0050896);; molecular function: nucleic acid binding transcription factor activity (GO:0001071);; biological process: biological regulation (GO:0065007);…	Plant hormone signal transduction (ko04075)
Brassinosteroid (BR)	Brassinosteroid-responsive RING protein 1	Unigene_509607	BRH1	1.53802e-06	-5.67082	down	0.112259	-2.60964	normal	RING-like zinc finger	Brassinosteroid-responsive RING protein 1 OS=Arabidopsis thaliana OX=3702 GN=BRH1 PE=2 SV=1	E3 ubiquitin-protein ligase RHA1B-like [Aegilops tauschii subsp. tauschii]	--	--
		Unigene_509609	BRH1	2.34105e-05	-5.5491	down	7.65694e-05	-4.43313	down	Ring finger domain;; Zinc finger, C3HC4 type (RING finger)	Brassinosteroid-responsive RING protein 1 OS=Arabidopsis thaliana OX=3702 GN=BRH1 PE=2 SV=1	E3 ubiquitin-protein ligase RHA1B [Brachypodium distachyon]	--	--
	Brassinosteroid LRR receptor kinase BRI1/ BRL1	Unigene_075747	BRI1	--	--	--	1.97114e-07	8.19902	up	Leucine rich repeat;; Protein kinase domain;; Protein tyrosine and serine/threonine kinase;; Leucine Rich repeats (2 copies);; Leucine Rich Repeat;; Leucine Rich repeat	Brassinosteroid LRR receptor kinase BRI1 OS=Oryza sativa subsp. japonica OX=39947 GN=BRI1 PE=1 SV=1	hypothetical protein CFC21_041712 [Triticum aestivum]	biological process: reproduction (GO:0000003);; biological process: cellular process (GO:0009987);; biological process: cellular component organization or biogenesis (GO:0071840);; biological process: reproductive process (GO:0022414);; biological process: developmental process (GO:0032502);; molecular function: catalytic activity (GO:0003824);; biological process: metabolic process (GO:0008152);…	Plant hormone signal transduction (ko04075)
Jasmonic acid (JA)	Gretchen Hagen 3 (GH3)	Unigene_195954	GH3.5	--	--	--	4.47401e-08	9.5865	up	GH3 auxin-responsive promoter	Jasmonoyl--L-amino acid synthetase GH3.5 OS=Oryza sativa subsp. japonica OX=39947 GN=GH3.5 PE=1 SV=1	unnamed protein product [Triticum turgidum subsp. durum]	biological process: response to stimulus (GO:0050896)	Plant hormone signal transduction (ko04075)

## Sheet: Leaves
Hormone	Gene classification	ID	Gene name	L0_vs_L3_DESeq2_FDR	L0_vs_L3_DESeq2_log2FC	L0_vs_L3_regulated	L0_vs_L2_DESeq2_FDR	L0_vs_L6_DESeq2_log2FC	L0_vs_L6_regulated	Pfam_annotation	Swissprot_annotation	nr_annotation	GO_second_level_annotation	KEGG_pathway_annotation
Abscisic acid (ABA)	PYL(PYR1-like protein)	Unigene_067640	PYL4	0.000184749	-3.12724	down	0.00621989	-2.52127	down	Polyketide cyclase / dehydrase and lipid transport;; Polyketide cyclase / dehydrase and lipid transport;; Pathogenesis-related protein Bet v 1 family	Abscisic acid receptor PYL4 OS=Arabidopsis thaliana OX=3702 GN=PYL4 PE=1 SV=1	PYL4-like abscisic acid receptor [Lolium arundinaceum]	biological process: response to stimulus (GO:0050896);; molecular function: molecular function regulator (GO:0098772);; biological process: biological regulation (GO:0065007);; molecular function: binding (GO:0005488);; cellular component: cell (GO:0005623);; cellular component: cell part (GO:0044464);; cellular component: organelle (GO:0043226);; biological process: cellular process (GO:0009987)…	MAPK signaling pathway - plant (ko04016);; Plant hormone signal transduction (ko04075)
		Unigene_194243	PYL4	1.77e-09	-3.1287	down	0.00116432	-2.49025	down	Polyketide cyclase / dehydrase and lipid transport	Abscisic acid receptor PYL4 OS=Arabidopsis thaliana OX=3702 GN=PYL4 PE=1 SV=1	unnamed protein product [Triticum turgidum subsp. durum]	biological process: response to stimulus (GO:0050896);; molecular function: molecular function regulator (GO:0098772);; biological process: biological regulation (GO:0065007);; molecular function: binding (GO:0005488);; cellular component: cell (GO:0005623);; cellular component: cell part (GO:0044464);; cellular component: organelle (GO:0043226);; biological process: cellular process (GO:0009987)…	MAPK signaling pathway - plant (ko04016);; Plant hormone signal transduction (ko04075)
		Unigene_308729	PYL4	0.0214766	-2.02644	normal	0.00273837	-1.97164	down	Polyketide cyclase / dehydrase and lipid transport;; Pathogenesis-related protein Bet v 1 family	Abscisic acid receptor PYL4 OS=Arabidopsis thaliana OX=3702 GN=PYL4 PE=1 SV=1	unnamed protein product [Triticum turgidum subsp. durum]	biological process: response to stimulus (GO:0050896);; molecular function: molecular function regulator (GO:0098772);; biological process: biological regulation (GO:0065007);; molecular function: binding (GO:0005488);; cellular component: cell (GO:0005623);; cellular component: cell part (GO:0044464);; cellular component: organelle (GO:0043226);; biological process: cellular process (GO:0009987)…	MAPK signaling pathway - plant (ko04016);; Plant hormone signal transduction (ko04075)
		Unigene_602518	PYL4	0.0155159	-1.94216	normal	0.000342739	-1.94996	down	Polyketide cyclase / dehydrase and lipid transport	Abscisic acid receptor PYL4 OS=Arabidopsis thaliana OX=3702 GN=PYL4 PE=1 SV=1	abscisic acid receptor PYL4-like [Panicum hallii]	biological process: response to stimulus (GO:0050896);; molecular function: molecular function regulator (GO:0098772);; biological process: biological regulation (GO:0065007);; molecular function: binding (GO:0005488);; cellular component: cell (GO:0005623);; cellular component: cell part (GO:0044464);; cellular component: organelle (GO:0043226);; biological process: cellular process (GO:0009987)…	MAPK signaling pathway - plant (ko04016);; Plant hormone signal transduction (ko04075)
		Unigene_602785	PYL5	0.0186178	-1.74153	normal	0.000100922	-1.67734	down	Polyketide cyclase / dehydrase and lipid transport	Abscisic acid receptor PYL5 OS=Oryza sativa subsp. japonica OX=39947 GN=PYL5 PE=1 SV=1	PYL5 [Festuca elata]	biological process: response to stimulus (GO:0050896);; molecular function: molecular function regulator (GO:0098772);; biological process: biological regulation (GO:0065007);; molecular function: binding (GO:0005488);; cellular component: cell (GO:0005623);; cellular component: cell part (GO:0044464);; cellular component: organelle (GO:0043226);; biological process: cellular process (GO:0009987)…	MAPK signaling pathway - plant (ko04016);; Plant hormone signal transduction (ko04075)
	SNF1-Related Protein Kinase 2 (SnRK2)	Unigene_012078	SAPK2	0.0922556	1.18667	normal	5.57e-16	2.51626	up	Protein kinase domain;; Protein tyrosine and serine/threonine kinase	Serine/threonine-protein kinase SAPK2 OS=Oryza sativa subsp. indica OX=39946 GN=SAPK2 PE=2 SV=2	serine/threonine-protein kinase SAPK2 [Aegilops tauschii subsp. tauschii]	biological process: response to stimulus (GO:0050896);; molecular function: catalytic activity (GO:0003824);; biological process: metabolic process (GO:0008152);; biological process: cellular process (GO:0009987);; molecular function: binding (GO:0005488);; cellular component: cell (GO:0005623);; cellular component: cell part (GO:0044464);; cellular component: organelle (GO:0043226);; biological …	MAPK signaling pathway - plant (ko04016);; Plant hormone signal transduction (ko04075)
		Unigene_176072	SAPK2	0.305934	0.925643	normal	5.8e-06	2.04717	up	Protein kinase domain;; Protein tyrosine and serine/threonine kinase	Serine/threonine-protein kinase SAPK2 OS=Oryza sativa subsp. indica OX=39946 GN=SAPK2 PE=2 SV=2	serine/threonine-protein kinase SAPK2 [Aegilops tauschii subsp. tauschii]	biological process: response to stimulus (GO:0050896);; molecular function: catalytic activity (GO:0003824);; biological process: metabolic process (GO:0008152);; biological process: cellular process (GO:0009987);; molecular function: binding (GO:0005488);; cellular component: cell (GO:0005623);; cellular component: cell part (GO:0044464);; cellular component: organelle (GO:0043226);; biological …	MAPK signaling pathway - plant (ko04016);; Plant hormone signal transduction (ko04075)
		Unigene_319275	SAPK2	0.0714917	1.59055	normal	3.16e-06	2.6208	up	Protein kinase domain;; Protein tyrosine and serine/threonine kinase;; Protein kinase domain	Serine/threonine-protein kinase SAPK2 OS=Oryza sativa subsp. indica OX=39946 GN=SAPK2 PE=2 SV=2	unnamed protein product [Triticum turgidum subsp. durum]	biological process: response to stimulus (GO:0050896);; molecular function: catalytic activity (GO:0003824);; biological process: metabolic process (GO:0008152);; biological process: cellular process (GO:0009987);; molecular function: binding (GO:0005488);; cellular component: cell (GO:0005623);; cellular component: cell part (GO:0044464);; cellular component: organelle (GO:0043226);; biological …	MAPK signaling pathway - plant (ko04016);; Plant hormone signal transduction (ko04075)
		Unigene_599826	SAPK4	0.0287673	1.3819	normal	0.00262995	1.52233	up	Protein kinase domain;; Protein tyrosine and serine/threonine kinase	Serine/threonine-protein kinase SAPK4 OS=Oryza sativa subsp. japonica OX=39947 GN=SAPK4 PE=2 SV=2	hypothetical protein BRADI_2g56267v3 [Brachypodium distachyon]	molecular function: catalytic activity (GO:0003824);; biological process: metabolic process (GO:0008152);; biological process: cellular process (GO:0009987);; molecular function: binding (GO:0005488);; cellular component: cell (GO:0005623);; cellular component: cell part (GO:0044464);; cellular component: organelle (GO:0043226);; biological process: signaling (GO:0023052);; biological process: si…	MAPK signaling pathway - plant (ko04016);; Plant hormone signal transduction (ko04075)
		Unigene_174460	SAPK4	0.01885	1.75961	normal	1.43e-10	3.26097	up	Protein kinase domain;; Protein tyrosine and serine/threonine kinase	Serine/threonine-protein kinase SAPK4 OS=Oryza sativa subsp. japonica OX=39947 GN=SAPK4 PE=2 SV=2	SnRK2.4 [Thinopyrum elongatum]	molecular function: catalytic activity (GO:0003824);; biological process: metabolic process (GO:0008152);; biological process: cellular process (GO:0009987);; molecular function: binding (GO:0005488);; cellular component: cell (GO:0005623);; cellular component: cell part (GO:0044464);; cellular component: organelle (GO:0043226);; biological process: signaling (GO:0023052);; biological process: si…	MAPK signaling pathway - plant (ko04016);; Plant hormone signal transduction (ko04075)
		Unigene_072042	SAPK5	0.895298	0.161205	normal	0.00816985	1.64435	up	Protein kinase domain;; Protein tyrosine and serine/threonine kinase	Serine/threonine-protein kinase SAPK5 OS=Oryza sativa subsp. japonica OX=39947 GN=SAPK5 PE=2 SV=1	hypothetical protein CFC21_032944 [Triticum aestivum]	molecular function: catalytic activity (GO:0003824);; biological process: metabolic process (GO:0008152);; biological process: cellular process (GO:0009987);; molecular function: binding (GO:0005488);; cellular component: cell (GO:0005623);; cellular component: cell part (GO:0044464);; cellular component: organelle (GO:0043226);; biological process: signaling (GO:0023052);; biological process: si…	MAPK signaling pathway - plant (ko04016);; Plant hormone signal transduction (ko04075)
		Unigene_314324	SAPK5	0.041006	1.59901	normal	1.41e-09	2.67626	up	Protein kinase domain;; Protein tyrosine and serine/threonine kinase	Serine/threonine-protein kinase SAPK5 OS=Oryza sativa subsp. japonica OX=39947 GN=SAPK5 PE=2 SV=1	hypothetical protein CFC21_032944 [Triticum aestivum]	molecular function: catalytic activity (GO:0003824);; biological process: metabolic process (GO:0008152);; biological process: cellular process (GO:0009987);; molecular function: binding (GO:0005488);; cellular component: cell (GO:0005623);; cellular component: cell part (GO:0044464);; cellular component: organelle (GO:0043226);; biological process: signaling (GO:0023052);; biological process: si…	MAPK signaling pathway - plant (ko04016);; Plant hormone signal transduction (ko04075)
		Unigene_443853	SAPK6	0.208454	1.54717	normal	3.13e-06	3.53714	up	--	Serine/threonine-protein kinase SAPK6 OS=Oryza sativa subsp. japonica OX=39947 GN=SAPK6 PE=1 SV=1	hypothetical protein SETIT_1G190000v2 [Setaria italica]	molecular function: catalytic activity (GO:0003824);; biological process: metabolic process (GO:0008152);; biological process: cellular process (GO:0009987);; cellular component: cell (GO:0005623);; cellular component: cell part (GO:0044464);; cellular component: organelle (GO:0043226);; biological process: signaling (GO:0023052);; biological process: single-organism process (GO:0044699);; biolog…	MAPK signaling pathway - plant (ko04016);; Plant hormone signal transduction (ko04075)
		Unigene_050790	SAPK6	0.104158	1.327	normal	1.68e-07	2.68967	up	Protein kinase domain;; Protein tyrosine and serine/threonine kinase	Serine/threonine-protein kinase SAPK6 OS=Oryza sativa subsp. japonica OX=39947 GN=SAPK6 PE=1 SV=1	hypothetical protein SETIT_1G190000v2 [Setaria italica]	molecular function: catalytic activity (GO:0003824);; biological process: metabolic process (GO:0008152);; biological process: cellular process (GO:0009987);; molecular function: binding (GO:0005488);; cellular component: cell (GO:0005623);; cellular component: cell part (GO:0044464);; cellular component: organelle (GO:0043226);; biological process: signaling (GO:0023052);; biological process: si…	MAPK signaling pathway - plant (ko04016);; Plant hormone signal transduction (ko04075)
		Unigene_068120	SAPK6	0.430011	0.703191	normal	1.21e-05	2.19876	up	Protein kinase domain;; Protein tyrosine and serine/threonine kinase	Serine/threonine-protein kinase SAPK6 OS=Oryza sativa subsp. japonica OX=39947 GN=SAPK6 PE=1 SV=1	hypothetical protein SETIT_1G190000v2 [Setaria italica]	molecular function: catalytic activity (GO:0003824);; biological process: metabolic process (GO:0008152);; biological process: cellular process (GO:0009987);; molecular function: binding (GO:0005488);; cellular component: cell (GO:0005623);; cellular component: cell part (GO:0044464);; cellular component: organelle (GO:0043226);; biological process: signaling (GO:0023052);; biological process: si…	MAPK signaling pathway - plant (ko04016);; Plant hormone signal transduction (ko04075)
		Unigene_519787	SAPK7	0.228301	1.01578	normal	0.00038656	2.05451	up	Protein kinase domain	Serine/threonine-protein kinase SAPK7 OS=Oryza sativa subsp. japonica OX=39947 GN=SAPK7 PE=2 SV=2	SnRK2.7 [Thinopyrum elongatum]	molecular function: catalytic activity (GO:0003824);; biological process: metabolic process (GO:0008152);; biological process: cellular process (GO:0009987);; molecular function: binding (GO:0005488);; cellular component: cell (GO:0005623);; cellular component: cell part (GO:0044464);; cellular component: organelle (GO:0043226);; biological process: response to stimulus (GO:0050896);; biological …	MAPK signaling pathway - plant (ko04016);; Plant hormone signal transduction (ko04075)
		Unigene_597685	SAPK8	0.202202	-0.951047	normal	1.83e-08	-2.63299	down	Protein kinase domain;; Protein tyrosine and serine/threonine kinase	Serine/threonine-protein kinase SAPK8 OS=Oryza sativa subsp. japonica OX=39947 GN=SAPK8 PE=1 SV=1	predicted protein, partial [Hordeum vulgare subsp. vulgare]	biological process: response to stimulus (GO:0050896);; molecular function: catalytic activity (GO:0003824);; biological process: metabolic process (GO:0008152);; biological process: cellular process (GO:0009987);; molecular function: binding (GO:0005488);; cellular component: cell (GO:0005623);; cellular component: cell part (GO:0044464);; cellular component: organelle (GO:0043226);; biological …	MAPK signaling pathway - plant (ko04016);; Plant hormone signal transduction (ko04075)
	Protein Phosphatase 2C(PP2C)	Unigene_174330	Os01g0846300	5.58e-06	3.20087	up	2.2e-11	3.50705	up	Protein phosphatase 2C;; Protein phosphatase 2C	Probable protein phosphatase 2C 9 OS=Oryza sativa subsp. japonica OX=39947 GN=Os01g0846300 PE=2 SV=1	unnamed protein product [Triticum turgidum subsp. durum]	molecular function: catalytic activity (GO:0003824)	MAPK signaling pathway - plant (ko04016);; Plant hormone signal transduction (ko04075)
		Unigene_305609	Os01g0846300	2.21e-07	4.15503	up	8.18e-07	4.21388	up	Protein phosphatase 2C;; Protein phosphatase 2C	Probable protein phosphatase 2C 9 OS=Oryza sativa subsp. japonica OX=39947 GN=Os01g0846300 PE=2 SV=1	hypothetical protein CFC21_042896 [Triticum aestivum]	molecular function: catalytic activity (GO:0003824)	MAPK signaling pathway - plant (ko04016);; Plant hormone signal transduction (ko04075)
		Unigene_526576	Os01g0846300	3.9e-05	2.24144	up	8.98e-07	1.99716	up	Protein phosphatase 2C	Probable protein phosphatase 2C 9 OS=Oryza sativa subsp. japonica OX=39947 GN=Os01g0846300 PE=2 SV=1	probable protein phosphatase 2C 9 [Aegilops tauschii subsp. tauschii]	molecular function: catalytic activity (GO:0003824)	MAPK signaling pathway - plant (ko04016);; Plant hormone signal transduction (ko04075)
		Unigene_517598	Os02g0224100	2.66e-05	-2.82697	down	8.67e-06	-3.02092	down	Protein phosphatase 2C	Probable protein phosphatase 2C 12 OS=Oryza sativa subsp. japonica OX=39947 GN=Os02g0224100 PE=2 SV=1	unnamed protein product [Triticum turgidum subsp. durum]	molecular function: catalytic activity (GO:0003824)	--
		Unigene_325816	Os02g0799000	0.0486272	1.34075	normal	1.09e-12	3.0401	up	Protein phosphatase 2C	Probable protein phosphatase 2C 27 OS=Oryza sativa subsp. japonica OX=39947 GN=Os02g0799000 PE=2 SV=1	unnamed protein product [Triticum turgidum subsp. durum]	molecular function: catalytic activity (GO:0003824)	--
		Unigene_038335	Os04g0167900	0.0142279	2.6318	normal	0.00079737	2.97122	up	Protein phosphatase 2C	Probable protein phosphatase 2C 37 OS=Oryza sativa subsp. japonica OX=39947 GN=Os04g0167900 PE=3 SV=2	hypothetical protein E2562_004475 [Oryza meyeriana var. granulata]	biological process: response to stimulus (GO:0050896);; molecular function: catalytic activity (GO:0003824)	MAPK signaling pathway - plant (ko04016);; Plant hormone signal transduction (ko04075)
		Unigene_069038	Os04g0321800	1.16e-08	3.70402	up	6.36e-31	5.09014	up	Protein phosphatase 2C	Probable protein phosphatase 2C 38 OS=Oryza sativa subsp. japonica OX=39947 GN=Os04g0321800 PE=2 SV=2	putative protein phosphatase 2C 38 [Hordeum vulgare]	molecular function: catalytic activity (GO:0003824);; biological process: metabolic process (GO:0008152);; biological process: cellular process (GO:0009987);; cellular component: cell (GO:0005623);; cellular component: cell part (GO:0044464);; cellular component: organelle (GO:0043226);; cellular component: membrane (GO:0016020)	--
		Unigene_603964	Os04g0321800	3.3e-07	2.76055	up	1.16e-24	3.73806	up	Protein phosphatase 2C	Probable protein phosphatase 2C 38 OS=Oryza sativa subsp. japonica OX=39947 GN=Os04g0321800 PE=2 SV=2	predicted protein, partial [Hordeum vulgare subsp. vulgare]	molecular function: catalytic activity (GO:0003824);; biological process: metabolic process (GO:0008152);; biological process: cellular process (GO:0009987);; cellular component: cell (GO:0005623);; cellular component: cell part (GO:0044464);; cellular component: organelle (GO:0043226);; cellular component: membrane (GO:0016020)	--
		Unigene_065591	Os04g0403701	0.000359546	1.86802	up	0.000852153	1.63065	up	Protein phosphatase 2C	Probable protein phosphatase 2C 39 OS=Oryza sativa subsp. japonica OX=39947 GN=Os04g0403701 PE=2 SV=2	putative protein phosphatase 2C 39 [Hordeum vulgare]	molecular function: catalytic activity (GO:0003824)	--
		Unigene_068054	Os05g0587100	0.00411797	1.77893	up	9.85e-11	2.89306	up	Protein phosphatase 2C	Probable protein phosphatase 2C 52 OS=Oryza sativa subsp. japonica OX=39947 GN=Os05g0587100 PE=2 SV=1	putative protein phosphatase 2C 52 [Hordeum vulgare]	molecular function: catalytic activity (GO:0003824)	--
		Unigene_195997	Os05g0587100	0.000106532	2.12284	up	5.51e-20	3.14588	up	Protein phosphatase 2C	Probable protein phosphatase 2C 52 OS=Oryza sativa subsp. japonica OX=39947 GN=Os05g0587100 PE=2 SV=1	putative protein phosphatase 2C 52 [Hordeum vulgare]	molecular function: catalytic activity (GO:0003824)	--
		Unigene_176434	Os06g0698300	0.000121328	3.83335	up	2.47e-09	5.42718	up	Protein phosphatase 2C	Probable protein phosphatase 2C 59 OS=Oryza sativa subsp. japonica OX=39947 GN=Os06g0698300 PE=2 SV=1	probable protein phosphatase 2C 59 [Aegilops tauschii subsp. tauschii]	molecular function: catalytic activity (GO:0003824);; biological process: metabolic process (GO:0008152);; biological process: cellular process (GO:0009987);; cellular component: extracellular region (GO:0005576);; cellular component: cell (GO:0005623);; cellular component: membrane (GO:0016020);; cellular component: cell part (GO:0044464);; biological process: response to stimulus (GO:0050896);;…	--
		Unigene_192368	Os06g0698300	3.61e-18	6.57365	up	1.23e-33	7.76829	up	Protein phosphatase 2C	Probable protein phosphatase 2C 59 OS=Oryza sativa subsp. japonica OX=39947 GN=Os06g0698300 PE=2 SV=1	hypothetical protein CFC21_104391 [Triticum aestivum]	molecular function: catalytic activity (GO:0003824);; biological process: metabolic process (GO:0008152);; biological process: cellular process (GO:0009987);; cellular component: extracellular region (GO:0005576);; cellular component: cell (GO:0005623);; cellular component: membrane (GO:0016020);; cellular component: cell part (GO:0044464);; biological process: response to stimulus (GO:0050896);;…	--
		Unigene_074107	Os06g0717800	0.0287234	-1.54539	normal	0.00397499	-2.91609	down	Protein phosphatase 2C	Probable protein phosphatase 2C 60 OS=Oryza sativa subsp. japonica OX=39947 GN=Os06g0717800 PE=2 SV=1	putative protein phosphatase 2C 60 [Hordeum vulgare]	molecular function: catalytic activity (GO:0003824);; cellular component: cell (GO:0005623);; cellular component: membrane (GO:0016020);; cellular component: cell part (GO:0044464)	--
		Unigene_527830	Os07g0566200	0.0121765	2.21033	normal	0.00737168	-3.57826	down	Protein phosphatase 2C	Probable protein phosphatase 2C 64 OS=Oryza sativa subsp. japonica OX=39947 GN=Os07g0566200 PE=2 SV=2	probable protein phosphatase 2C 64 [Aegilops tauschii subsp. tauschii]	molecular function: catalytic activity (GO:0003824);; biological process: metabolic process (GO:0008152);; biological process: cellular process (GO:0009987);; cellular component: cell (GO:0005623);; cellular component: membrane (GO:0016020);; cellular component: cell part (GO:0044464)	--
		Unigene_317351	Os08g0500300	0.000176946	-2.21282	down	2.39e-10	-3.37705	down	Protein phosphatase 2C	Probable protein phosphatase 2C 66 OS=Oryza sativa subsp. japonica OX=39947 GN=Os08g0500300 PE=2 SV=1	unnamed protein product [Triticum turgidum subsp. durum]	molecular function: catalytic activity (GO:0003824)	--
		Unigene_191838	Os09g0325700	1.05e-07	4.94234	up	2.1e-11	5.51416	up	Protein phosphatase 2C	Probable protein phosphatase 2C 68 OS=Oryza sativa subsp. japonica OX=39947 GN=Os09g0325700 PE=2 SV=2	hypothetical protein CFC21_071345 [Triticum aestivum]	molecular function: catalytic activity (GO:0003824)	MAPK signaling pathway - plant (ko04016);; Plant hormone signal transduction (ko04075)
		Unigene_325546	Os09g0325700	7.98e-12	4.99917	up	1.85e-14	5.78938	up	Protein phosphatase 2C	Probable protein phosphatase 2C 68 OS=Oryza sativa subsp. japonica OX=39947 GN=Os09g0325700 PE=2 SV=2	hypothetical protein CFC21_071345 [Triticum aestivum]	molecular function: catalytic activity (GO:0003824)	MAPK signaling pathway - plant (ko04016);; Plant hormone signal transduction (ko04075)
		Unigene_589296	Os09g0325700	2.31e-05	3.83902	up	0.000416213	3.17521	up	Protein phosphatase 2C	Probable protein phosphatase 2C 68 OS=Oryza sativa subsp. japonica OX=39947 GN=Os09g0325700 PE=2 SV=2	predicted protein, partial [Hordeum vulgare subsp. vulgare]	molecular function: catalytic activity (GO:0003824)	MAPK signaling pathway - plant (ko04016);; Plant hormone signal transduction (ko04075)
		Unigene_070844	Os09g0558000	0.00342549	2.74226	up	0.000318938	3.75913	up	Protein phosphatase 2C;; Protein phosphatase 2C;; Stage II sporulation protein E (SpoIIE)	Probable protein phosphatase 2C 70 OS=Oryza sativa subsp. japonica OX=39947 GN=Os09g0558000 PE=2 SV=2	probable protein phosphatase 2C 70 isoform X1 [Brachypodium distachyon]	biological process: response to stimulus (GO:0050896);; molecular function: catalytic activity (GO:0003824);; cellular component: cell (GO:0005623);; cellular component: membrane (GO:0016020);; cellular component: cell part (GO:0044464)	--
		Unigene_026541	Os09g0558000	0.0087993	1.88308	up	4.48e-11	3.19815	up	Protein phosphatase 2C;; Protein phosphatase 2C	Probable protein phosphatase 2C 70 OS=Oryza sativa subsp. japonica OX=39947 GN=Os09g0558000 PE=2 SV=2	probable protein phosphatase 2C 70 isoform X1 [Brachypodium distachyon]	biological process: response to stimulus (GO:0050896);; molecular function: catalytic activity (GO:0003824);; cellular component: cell (GO:0005623);; cellular component: membrane (GO:0016020);; cellular component: cell part (GO:0044464)	--
		Unigene_033911	PP2C06	0.0147463	1.68878	normal	6.96e-08	2.42267	up	Protein phosphatase 2C	Probable protein phosphatase 2C 6 OS=Oryza sativa subsp. japonica OX=39947 GN=PP2C06 PE=1 SV=1	hypothetical protein CFC21_041357 [Triticum aestivum]	molecular function: catalytic activity (GO:0003824);; biological process: metabolic process (GO:0008152);; biological process: cellular process (GO:0009987);; cellular component: cell (GO:0005623);; cellular component: cell part (GO:0044464);; cellular component: organelle (GO:0043226)	MAPK signaling pathway - plant (ko04016);; Plant hormone signal transduction (ko04075)
		Unigene_324879	PP2C06	0.0116594	1.54825	normal	1.83e-05	2.01977	up	Protein phosphatase 2C	Probable protein phosphatase 2C 6 OS=Oryza sativa subsp. japonica OX=39947 GN=PP2C06 PE=1 SV=1	protein phosphatase 2C [Hordeum vulgare]	molecular function: catalytic activity (GO:0003824);; biological process: metabolic process (GO:0008152);; biological process: cellular process (GO:0009987);; cellular component: cell (GO:0005623);; cellular component: cell part (GO:0044464);; cellular component: organelle (GO:0043226)	MAPK signaling pathway - plant (ko04016);; Plant hormone signal transduction (ko04075)
		Unigene_193757	PP2C30	1.13e-06	4.00792	up	3.09e-14	4.51452	up	--	Probable protein phosphatase 2C 30 OS=Oryza sativa subsp. japonica OX=39947 GN=PP2C30 PE=1 SV=1	probable protein phosphatase 2C 30 [Brachypodium distachyon]	biological process: response to stimulus (GO:0050896);; cellular component: cell (GO:0005623);; cellular component: cell part (GO:0044464);; cellular component: organelle (GO:0043226);; biological process: cellular process (GO:0009987);; biological process: signaling (GO:0023052);; biological process: single-organism process (GO:0044699);; biological process: biological regulation (GO:0065007);; …	MAPK signaling pathway - plant (ko04016);; Plant hormone signal transduction (ko04075)
		Unigene_312867	PP2C30	4.05e-06	3.6722	up	1.5e-07	4.06513	up	Protein phosphatase 2C	Probable protein phosphatase 2C 30 OS=Oryza sativa subsp. japonica OX=39947 GN=PP2C30 PE=1 SV=1	probable protein phosphatase 2C 30 [Brachypodium distachyon]	biological process: response to stimulus (GO:0050896);; molecular function: catalytic activity (GO:0003824);; cellular component: cell (GO:0005623);; cellular component: cell part (GO:0044464);; cellular component: organelle (GO:0043226);; biological process: cellular process (GO:0009987);; biological process: signaling (GO:0023052);; biological process: single-organism process (GO:0044699);; bio…	MAPK signaling pathway - plant (ko04016);; Plant hormone signal transduction (ko04075)
		Unigene_323773	XB15	0.0327282	1.57326	normal	0.000220712	2.07796	up	Protein phosphatase 2C	Protein phosphatase 2C 35 OS=Oryza sativa subsp. japonica OX=39947 GN=XB15 PE=1 SV=1	protein phosphatase 2C 35-like [Aegilops tauschii subsp. tauschii]	molecular function: catalytic activity (GO:0003824);; cellular component: cell (GO:0005623);; cellular component: membrane (GO:0016020);; cellular component: cell part (GO:0044464);; biological process: multicellular organismal process (GO:0032501);; biological process: developmental process (GO:0032502);; biological process: single-organism process (GO:0044699)	--
Ethylene (ETH)	Ethylene-insensitive 3(EIN3)	Unigene_029464	EBF1	0.991543	0.0123018	normal	0.000470618	-2.53972	down	Leucine Rich repeat;; Leucine Rich repeats (2 copies)	EIN3-binding F-box protein 1 OS=Arabidopsis thaliana OX=3702 GN=EBF1 PE=1 SV=1	predicted protein [Hordeum vulgare subsp. vulgare]	cellular component: cell (GO:0005623);; cellular component: macromolecular complex (GO:0032991);; cellular component: cell part (GO:0044464);; molecular function: binding (GO:0005488);; cellular component: organelle (GO:0043226);; biological process: metabolic process (GO:0008152);; biological process: cellular process (GO:0009987);; biological process: response to stimulus (GO:0050896);; biologi…	MAPK signaling pathway - plant (ko04016);; Plant hormone signal transduction (ko04075)
		Unigene_511567	EBF2	0.964232	-0.0773475	normal	1.22e-05	-7.50312	down	--	EIN3-binding F-box protein 2 OS=Arabidopsis thaliana OX=3702 GN=EBF2 PE=1 SV=1	EIN3-binding F-box protein 1 [Zea mays]	cellular component: cell (GO:0005623);; cellular component: macromolecular complex (GO:0032991);; cellular component: cell part (GO:0044464);; cellular component: organelle (GO:0043226);; biological process: metabolic process (GO:0008152);; biological process: cellular process (GO:0009987);; biological process: response to stimulus (GO:0050896);; biological process: biological regulation (GO:0065…	MAPK signaling pathway - plant (ko04016);; Plant hormone signal transduction (ko04075)
		Unigene_570694	EBF2	0.502426	0.713795	normal	2.12e-05	-7.22507	down	--	EIN3-binding F-box protein 2 OS=Arabidopsis thaliana OX=3702 GN=EBF2 PE=1 SV=1	unnamed protein product [Triticum turgidum subsp. durum]	cellular component: cell (GO:0005623);; cellular component: macromolecular complex (GO:0032991);; cellular component: cell part (GO:0044464);; cellular component: organelle (GO:0043226);; biological process: metabolic process (GO:0008152);; biological process: cellular process (GO:0009987);; biological process: response to stimulus (GO:0050896);; biological process: biological regulation (GO:0065…	MAPK signaling pathway - plant (ko04016);; Plant hormone signal transduction (ko04075)
	Ethylene response factor(ERF)	Unigene_037808	ERF1A	0.00412524	-2.89877	down	0.0030981	-3.84939	down	AP2 domain	Ethylene-responsive transcription factor 1A OS=Arabidopsis thaliana OX=3702 GN=ERF1A PE=1 SV=2	ethylene-responsive transcription factor 1-like [Hordeum vulgare]	biological process: cellular process (GO:0009987);; biological process: signaling (GO:0023052);; biological process: single-organism process (GO:0044699);; biological process: response to stimulus (GO:0050896);; biological process: biological regulation (GO:0065007);; biological process: immune system process (GO:0002376);; molecular function: nucleic acid binding transcription factor activity (G…	--
		Unigene_511567	EBF2	0.964232	-0.0773475	normal	1.22e-05	-7.50312	down	--	EIN3-binding F-box protein 2 OS=Arabidopsis thaliana OX=3702 GN=EBF2 PE=1 SV=1	EIN3-binding F-box protein 1 [Zea mays]	cellular component: cell (GO:0005623);; cellular component: macromolecular complex (GO:0032991);; cellular component: cell part (GO:0044464);; cellular component: organelle (GO:0043226);; biological process: metabolic process (GO:0008152);; biological process: cellular process (GO:0009987);; biological process: response to stimulus (GO:0050896);; biological process: biological regulation (GO:0065…	MAPK signaling pathway - plant (ko04016);; Plant hormone signal transduction (ko04075)
		Unigene_570694	EBF2	0.502426	0.713795	normal	2.12e-05	-7.22507	down	--	EIN3-binding F-box protein 2 OS=Arabidopsis thaliana OX=3702 GN=EBF2 PE=1 SV=1	unnamed protein product [Triticum turgidum subsp. durum]	cellular component: cell (GO:0005623);; cellular component: macromolecular complex (GO:0032991);; cellular component: cell part (GO:0044464);; cellular component: organelle (GO:0043226);; biological process: metabolic process (GO:0008152);; biological process: cellular process (GO:0009987);; biological process: response to stimulus (GO:0050896);; biological process: biological regulation (GO:0065…	MAPK signaling pathway - plant (ko04016);; Plant hormone signal transduction (ko04075)
		Unigene_595796	ERF008	0.578398	-0.636464	normal	0.000150382	-4.62994	down	AP2 domain	Ethylene-responsive transcription factor ERF008 OS=Arabidopsis thaliana OX=3702 GN=ERF008 PE=2 SV=1	--	biological process: response to stimulus (GO:0050896);; molecular function: nucleic acid binding transcription factor activity (GO:0001071);; biological process: biological regulation (GO:0065007)	--
		Unigene_185468	ERF053	0.00444736	2.64159	up	0.115887	1.36471	normal	AP2 domain	Ethylene-responsive transcription factor ERF053 OS=Arabidopsis thaliana OX=3702 GN=ERF053 PE=1 SV=1	--	molecular function: nucleic acid binding transcription factor activity (GO:0001071);; biological process: biological regulation (GO:0065007)	--
		Unigene_172484	ERF110	4.68e-05	5.44134	up	1.09e-05	7.30222	up	--	Ethylene-responsive transcription factor ERF110 OS=Arabidopsis thaliana OX=3702 GN=ERF110 PE=2 SV=2	ethylene-responsive transcription factor ABR1-like [Panicum miliaceum]	biological process: response to stimulus (GO:0050896);; molecular function: nucleic acid binding transcription factor activity (GO:0001071);; biological process: biological regulation (GO:0065007);; biological process: multi-organism process (GO:0051704)	Spliceosome (ko03040)
		Unigene_303347	ERF110	3.37e-11	7.47843	up	1.06e-08	8.72542	up	--	Ethylene-responsive transcription factor ERF110 OS=Arabidopsis thaliana OX=3702 GN=ERF110 PE=2 SV=2	F-box domain containing protein [Hordeum vulgare]	biological process: response to stimulus (GO:0050896);; molecular function: nucleic acid binding transcription factor activity (GO:0001071);; biological process: biological regulation (GO:0065007);; biological process: multi-organism process (GO:0051704)	Spliceosome (ko03040)
		Unigene_321682	ERF110	--	--	--	0.00049616	2.86184	up	AP2 domain	Ethylene-responsive transcription factor ERF110 OS=Arabidopsis thaliana OX=3702 GN=ERF110 PE=2 SV=2	F-box domain containing protein [Hordeum vulgare]	biological process: response to stimulus (GO:0050896);; molecular function: nucleic acid binding transcription factor activity (GO:0001071);; biological process: biological regulation (GO:0065007);; biological process: multi-organism process (GO:0051704)	Spliceosome (ko03040)
		Unigene_074722	ERF117	0.0904583	1.22536	normal	3.44e-08	2.4058	up	AP2 domain	Ethylene-responsive transcription factor ERF117 OS=Arabidopsis thaliana OX=3702 GN=ERF117 PE=2 SV=1	pathogenesis-related genes transcriptional activator PTI6-like [Aegilops tauschii subsp. tauschii]	molecular function: nucleic acid binding transcription factor activity (GO:0001071);; biological process: biological regulation (GO:0065007);; biological process: multicellular organismal process (GO:0032501);; biological process: developmental process (GO:0032502);; biological process: single-organism process (GO:0044699)	--
		Unigene_591623	ERF117	0.213875	-1.27803	normal	2.76e-09	-4.89619	down	AP2 domain	Ethylene-responsive transcription factor ERF117 OS=Arabidopsis thaliana OX=3702 GN=ERF117 PE=2 SV=1	dehydration-responsive element-binding protein 2D [Brachypodium distachyon]	molecular function: nucleic acid binding transcription factor activity (GO:0001071);; biological process: biological regulation (GO:0065007)	Plant-pathogen interaction (ko04626)
		Unigene_197153	ERF12	0.00585798	2.59964	up	0.0321297	1.62651	normal	Starch binding domain;; AP2 domain	Ethylene-responsive transcription factor 12 OS=Arabidopsis thaliana OX=3702 GN=ERF12 PE=1 SV=1	uncharacterized protein LOC109770157 [Aegilops tauschii subsp. tauschii]	molecular function: nucleic acid binding transcription factor activity (GO:0001071);; biological process: biological regulation (GO:0065007);; molecular function: binding (GO:0005488)	--
		Unigene_518350	ERF2	0.00537285	-2.66426	down	3.22e-09	-5.68535	down	AP2 domain	Ethylene-responsive transcription factor 2 OS=Nicotiana sylvestris OX=4096 GN=ERF2 PE=2 SV=1	ethylene-responsive factor [Thinopyrum intermedium]	biological process: cellular process (GO:0009987);; biological process: signaling (GO:0023052);; biological process: single-organism process (GO:0044699);; biological process: response to stimulus (GO:0050896);; biological process: biological regulation (GO:0065007);; biological process: immune system process (GO:0002376);; molecular function: nucleic acid binding transcription factor activity (G…	MAPK signaling pathway - plant (ko04016);; Plant hormone signal transduction (ko04075)
		Unigene_603633	ERF2	0.14567	-1.66221	normal	0.000134294	-5.37244	down	AP2 domain	Ethylene-responsive transcription factor 2 OS=Nicotiana sylvestris OX=4096 GN=ERF2 PE=2 SV=1	pathogen-inducible transcription factor ERF3 [Triticum aestivum]	biological process: cellular process (GO:0009987);; biological process: signaling (GO:0023052);; biological process: single-organism process (GO:0044699);; biological process: response to stimulus (GO:0050896);; biological process: biological regulation (GO:0065007);; biological process: immune system process (GO:0002376);; molecular function: nucleic acid binding transcription factor activity (G…	MAPK signaling pathway - plant (ko04016);; Plant hormone signal transduction (ko04075)
		Unigene_177108	ERF3	0.00726197	-3.26873	down	0.00516286	-3.73945	down	AP2 domain	Ethylene-responsive transcription factor 3 OS=Nicotiana tabacum OX=4097 GN=ERF3 PE=2 SV=1	unnamed protein product [Triticum turgidum subsp. durum]	molecular function: nucleic acid binding transcription factor activity (GO:0001071);; biological process: biological regulation (GO:0065007)	MAPK signaling pathway - plant (ko04016);; Plant hormone signal transduction (ko04075)
		Unigene_513354	ERF3	0.642552	-0.582019	normal	2.81e-05	-5.92264	down	AP2 domain	Ethylene-responsive transcription factor 3 OS=Nicotiana tabacum OX=4097 GN=ERF3 PE=2 SV=1	hypothetical protein CFC21_082704 [Triticum aestivum]	biological process: cellular process (GO:0009987);; biological process: signaling (GO:0023052);; biological process: single-organism process (GO:0044699);; biological process: response to stimulus (GO:0050896);; biological process: biological regulation (GO:0065007);; molecular function: binding (GO:0005488);; molecular function: nucleic acid binding transcription factor activity (GO:0001071);; c…	--
		Unigene_514995	ERF3	0.432738	-1.07325	normal	7.06e-07	-8.30395	down	AP2 domain	Ethylene-responsive transcription factor 3 OS=Nicotiana tabacum OX=4097 GN=ERF3 PE=2 SV=1	ethylene-responsive transcription factor 3-like [Aegilops tauschii subsp. tauschii]	molecular function: nucleic acid binding transcription factor activity (GO:0001071);; biological process: biological regulation (GO:0065007)	--
		Unigene_522674	ERF3	0.595122	-0.80438	normal	0.000299802	-4.6286	down	--	Ethylene-responsive transcription factor 3 OS=Nicotiana tabacum OX=4097 GN=ERF3 PE=2 SV=1	hypothetical protein CFC21_083127 [Triticum aestivum]	--	--
		Unigene_064917	ERF4	0.296001	-1.11381	normal	2.83e-11	-6.80909	down	AP2 domain	Ethylene-responsive transcription factor 4 OS=Arabidopsis thaliana OX=3702 GN=ERF4 PE=1 SV=1	ethylene-responsive factor-like transcription factor ERFL2b [Hordeum vulgare]	molecular function: nucleic acid binding transcription factor activity (GO:0001071);; biological process: biological regulation (GO:0065007)	Plant-pathogen interaction (ko04626)
		Unigene_175470	ERF4	0.0685889	-3.04428	normal	8.15e-07	-6.4312	down	AP2 domain	Ethylene-responsive transcription factor 4 OS=Arabidopsis thaliana OX=3702 GN=ERF4 PE=1 SV=1	ethylene-responsive transcription factor 3 [Agropyron mongolicum]	molecular function: nucleic acid binding transcription factor activity (GO:0001071);; biological process: biological regulation (GO:0065007)	Plant-pathogen interaction (ko04626)
		Unigene_194799	ERF4	0.389015	-1.09653	normal	0.00571545	-2.57907	down	AP2 domain	Ethylene-responsive transcription factor 4 OS=Arabidopsis thaliana OX=3702 GN=ERF4 PE=1 SV=1	ethylene-responsive transcription factor 8-like [Aegilops tauschii subsp. tauschii]	molecular function: nucleic acid binding transcription factor activity (GO:0001071);; biological process: biological regulation (GO:0065007)	--
		Unigene_318479	ERF4	0.00459965	-3.18413	down	9.8e-06	-5.00654	down	AP2 domain	Ethylene-responsive transcription factor 4 OS=Nicotiana sylvestris OX=4096 GN=ERF4 PE=2 SV=1	ethylene-responsive transcription factor 4 [Setaria italica]	molecular function: nucleic acid binding transcription factor activity (GO:0001071);; biological process: biological regulation (GO:0065007)	--
		Unigene_593418	ERF4	0.124315	-1.47775	normal	5.62e-07	-5.57304	down	AP2 domain	Ethylene-responsive transcription factor 4 OS=Nicotiana tabacum OX=4097 GN=ERF4 PE=1 SV=1	ethylene-responsive transcription factor 4 [Setaria italica]	molecular function: nucleic acid binding transcription factor activity (GO:0001071);; biological process: biological regulation (GO:0065007)	MAPK signaling pathway - plant (ko04016);; Plant hormone signal transduction (ko04075)
		Unigene_597634	ERF4	0.594527	-0.78951	normal	1.23e-06	-7.28308	down	--	Ethylene-responsive transcription factor 4 OS=Arabidopsis thaliana OX=3702 GN=ERF4 PE=1 SV=1	ethylene-responsive transcription factor 3 [Agropyron mongolicum]	--	MAPK signaling pathway - plant (ko04016);; Plant hormone signal transduction (ko04075)
		Unigene_185357	ERF5	0.00196229	-3.5142	down	8.85e-05	-5.16226	down	AP2 domain	Ethylene-responsive transcription factor 5 OS=Nicotiana tabacum OX=4097 GN=ERF5 PE=2 SV=1	--	biological process: cellular process (GO:0009987);; biological process: signaling (GO:0023052);; biological process: single-organism process (GO:0044699);; biological process: response to stimulus (GO:0050896);; biological process: biological regulation (GO:0065007);; molecular function: binding (GO:0005488);; molecular function: nucleic acid binding transcription factor activity (GO:0001071);; c…	--
		Unigene_591056	ERF5	0.0209323	-2.85183	normal	4.36e-05	-4.68683	down	AP2 domain	Ethylene-responsive transcription factor 5 OS=Nicotiana tabacum OX=4097 GN=ERF5 PE=2 SV=1	ethylene-responsive transcription factor 5-like [Aegilops tauschii subsp. tauschii]	biological process: cellular process (GO:0009987);; biological process: signaling (GO:0023052);; biological process: single-organism process (GO:0044699);; biological process: response to stimulus (GO:0050896);; biological process: biological regulation (GO:0065007);; molecular function: binding (GO:0005488);; molecular function: nucleic acid binding transcription factor activity (GO:0001071);; c…	MAPK signaling pathway - plant (ko04016);; Plant hormone signal transduction (ko04075)
		Unigene_518442	ERF6	0.00444713	-2.79998	down	6.53e-06	-5.54111	down	AP2 domain	Ethylene-responsive transcription factor 6 OS=Arabidopsis thaliana OX=3702 GN=ERF6 PE=1 SV=2	ethylene-responsive transcription factor 5-like [Aegilops tauschii subsp. tauschii]	biological process: cellular process (GO:0009987);; biological process: signaling (GO:0023052);; biological process: single-organism process (GO:0044699);; biological process: response to stimulus (GO:0050896);; biological process: biological regulation (GO:0065007);; molecular function: binding (GO:0005488);; molecular function: nucleic acid binding transcription factor activity (GO:0001071);; c…	--
		Unigene_187444	ERF7	0.281769	-1.29432	normal	9.07e-05	-3.64626	down	AP2 domain	Ethylene-responsive transcription factor 7 OS=Arabidopsis thaliana OX=3702 GN=ERF7 PE=1 SV=1	ethylene-responsive transcription factor 4 [Setaria italica]	molecular function: nucleic acid binding transcription factor activity (GO:0001071);; biological process: biological regulation (GO:0065007)	--
		Unigene_598818	ERF9	0.784555	0.352729	normal	0.000183183	-3.76795	down	AP2 domain	Ethylene-responsive transcription factor 9 OS=Arabidopsis thaliana OX=3702 GN=ERF9 PE=1 SV=1	ethylene-responsive transcription factor 4-like [Panicum miliaceum]	molecular function: nucleic acid binding transcription factor activity (GO:0001071);; biological process: biological regulation (GO:0065007)	--
	Ethylene response sensor (ERS)	Unigene_004310	ERS1	0.236494	0.91605	normal	0.00512303	1.38904	up	Cullin family;; Histidine kinase-, DNA gyrase B-, and HSP90-like ATPase;; GAF domain;; His Kinase A (phospho-acceptor) domain	Probable ethylene response sensor 1 OS=Oryza sativa subsp. indica OX=39946 GN=ERS1 PE=2 SV=1	ethylene receptor, partial [Avena fatua]	molecular function: catalytic activity (GO:0003824);; molecular function: signal transducer activity (GO:0004871);; molecular function: molecular transducer activity (GO:0060089);; biological process: metabolic process (GO:0008152);; biological process: cellular process (GO:0009987);; biological process: signaling (GO:0023052);; biological process: single-organism process (GO:0044699);; biologica…	MAPK signaling pathway - plant (ko04016);; Plant hormone signal transduction (ko04075)
Auxin (IAA)	Auxin response factor (ARF)	Unigene_326107	ARF6	0.154125	1.10292	normal	6.73e-06	2.06641	up	--	Auxin response factor 6 OS=Arabidopsis thaliana OX=3702 GN=ARF6 PE=1 SV=2	unnamed protein product [Triticum turgidum subsp. durum]	--	Plant hormone signal transduction (ko04075)
		Unigene_193747	ARF7	0.134433	1.38463	normal	0.00408107	1.57512	up	AUX/IAA family;; Auxin response factor	Auxin response factor 7 OS=Oryza sativa subsp. japonica OX=39947 GN=ARF7 PE=2 SV=1	auxin response factor 7 [Brachypodium distachyon]	molecular function: binding (GO:0005488);; cellular component: cell (GO:0005623);; cellular component: organelle (GO:0043226);; cellular component: cell part (GO:0044464);; biological process: biological regulation (GO:0065007);; biological process: response to stimulus (GO:0050896)	Plant hormone signal transduction (ko04075)
		Unigene_193962	ARF14	0.000335089	3.73933	up	1.02e-05	4.6814	up	B3 DNA binding domain	Auxin response factor 14 OS=Oryza sativa subsp. japonica OX=39947 GN=ARF14 PE=2 SV=2	hypothetical protein CFC21_013121 [Triticum aestivum]	biological process: reproduction (GO:0000003);; biological process: cellular process (GO:0009987);; biological process: developmental process (GO:0032502);; biological process: single-organism process (GO:0044699);; biological process: reproductive process (GO:0022414);; molecular function: binding (GO:0005488);; molecular function: nucleic acid binding transcription factor activity (GO:0001071);…	Plant hormone signal transduction (ko04075)
		Unigene_029103	ARF15	1.07e-08	3.5171	up	1.14e-09	3.85029	up	Auxin response factor;; B3 DNA binding domain	Auxin response factor 15 OS=Oryza sativa subsp. japonica OX=39947 GN=ARF15 PE=2 SV=1	ARF protein [Phyllostachys edulis]	biological process: reproduction (GO:0000003);; biological process: cellular process (GO:0009987);; biological process: developmental process (GO:0032502);; biological process: single-organism process (GO:0044699);; biological process: reproductive process (GO:0022414);; molecular function: binding (GO:0005488);; molecular function: nucleic acid binding transcription factor activity (GO:0001071);…	Plant hormone signal transduction (ko04075)
		Unigene_075329	ARF17	1.098e-05	-3.13168	down	0.00983366	-1.38792	down	Auxin response factor;; B3 DNA binding domain;; AUX/IAA family	Auxin response factor 17 OS=Oryza sativa subsp. japonica OX=39947 GN=ARF17 PE=2 SV=1	auxin response factor 17 isoform X1 [Brachypodium distachyon]	molecular function: binding (GO:0005488);; cellular component: cell (GO:0005623);; cellular component: organelle (GO:0043226);; cellular component: cell part (GO:0044464);; biological process: biological regulation (GO:0065007);; biological process: response to stimulus (GO:0050896)	Plant hormone signal transduction (ko04075)
		Unigene_020565	ARF21	0.982388	0.0318656	normal	9.17e-06	-3.43488	down	Auxin response factor;; B3 DNA binding domain;; AUX/IAA family	Auxin response factor 21 OS=Oryza sativa subsp. japonica OX=39947 GN=ARF21 PE=2 SV=2	hypothetical protein CFC21_108933 [Triticum aestivum]	molecular function: binding (GO:0005488);; molecular function: nucleic acid binding transcription factor activity (GO:0001071);; biological process: biological regulation (GO:0065007);; cellular component: cell (GO:0005623);; cellular component: cell part (GO:0044464);; cellular component: organelle (GO:0043226);; biological process: cellular process (GO:0009987);; biological process: signaling (…	Plant hormone signal transduction (ko04075)
		Unigene_075779	ARF21	0.25523	-0.951242	normal	0.00333373	-1.23406	down	Auxin response factor;; B3 DNA binding domain	Auxin response factor 21 OS=Oryza sativa subsp. japonica OX=39947 GN=ARF21 PE=2 SV=2	hypothetical protein CFC21_097548 [Triticum aestivum]	molecular function: binding (GO:0005488);; molecular function: nucleic acid binding transcription factor activity (GO:0001071);; biological process: biological regulation (GO:0065007);; cellular component: cell (GO:0005623);; cellular component: cell part (GO:0044464);; cellular component: organelle (GO:0043226);; biological process: cellular process (GO:0009987);; biological process: signaling (…	Plant hormone signal transduction (ko04075)
		Unigene_526890	ARF23	0.808731	-0.231588	normal	0.00470206	-1.50195	down	Auxin response factor;; B3 DNA binding domain;; AUX/IAA family	Auxin response factor 23 OS=Oryza sativa subsp. indica OX=39946 GN=ARF23 PE=2 SV=1	auxin response factor 23 isoform X1 [Brachypodium distachyon]	biological process: reproduction (GO:0000003);; biological process: response to stimulus (GO:0050896);; biological process: reproductive process (GO:0022414);; biological process: developmental process (GO:0032502);; molecular function: binding (GO:0005488);; molecular function: nucleic acid binding transcription factor activity (GO:0001071);; biological process: biological regulation (GO:0065007…	Plant hormone signal transduction (ko04075)
		Unigene_522566	ARF24	0.890338	0.193639	normal	0.00229666	-4.34796	down	Auxin response factor;; B3 DNA binding domain;; AUX/IAA family	Auxin response factor 24 OS=Oryza sativa subsp. japonica OX=39947 GN=ARF24 PE=2 SV=1	auxin response factor 24 [Brachypodium distachyon]	biological process: reproduction (GO:0000003);; biological process: response to stimulus (GO:0050896);; biological process: reproductive process (GO:0022414);; biological process: developmental process (GO:0032502);; molecular function: binding (GO:0005488);; molecular function: nucleic acid binding transcription factor activity (GO:0001071);; biological process: biological regulation (GO:0065007…	Plant hormone signal transduction (ko04075)
		Unigene_530281	ARF25	0.846824	0.215929	normal	0.00096124	-2.30325	down	Auxin response factor;; B3 DNA binding domain;; AUX/IAA family	Auxin response factor 25 OS=Oryza sativa subsp. japonica OX=39947 GN=ARF25 PE=2 SV=1	unnamed protein product [Triticum turgidum subsp. durum]	molecular function: binding (GO:0005488);; cellular component: cell (GO:0005623);; cellular component: organelle (GO:0043226);; cellular component: cell part (GO:0044464);; biological process: biological regulation (GO:0065007);; biological process: response to stimulus (GO:0050896)	Plant hormone signal transduction (ko04075)
	Auxin (IAA)	Unigene_195010	IAA2	0.0023164	-2.01147	down	0.00393584	-1.3879	down	AUX/IAA family	Auxin-responsive protein IAA2 OS=Oryza sativa subsp. japonica OX=39947 GN=IAA2 PE=2 SV=1	hypothetical protein CFC21_069583 [Triticum aestivum]	biological process: response to stimulus (GO:0050896)	Plant hormone signal transduction (ko04075)
		Unigene_518971	IAA2	0.348304	-0.901136	normal	4.25e-09	-6.5115	down	AUX/IAA family	Auxin-responsive protein IAA2 OS=Oryza sativa subsp. japonica OX=39947 GN=IAA2 PE=2 SV=1	hypothetical protein CFC21_069583 [Triticum aestivum]	biological process: response to stimulus (GO:0050896)	Plant hormone signal transduction (ko04075)
		Unigene_043438	IAA3	0.0587152	-2.24631	normal	1.69e-10	-7.77544	down	AUX/IAA family;; AUX/IAA family	Auxin-responsive protein IAA3 OS=Oryza sativa subsp. japonica OX=39947 GN=IAA3 PE=2 SV=1	auxin-responsive protein IAA17 [Brachypodium distachyon]	molecular function: nucleic acid binding transcription factor activity (GO:0001071);; biological process: biological regulation (GO:0065007);; biological process: response to stimulus (GO:0050896)	Plant hormone signal transduction (ko04075)
		Unigene_172620	IAA3	1.22e-05	-3.74486	down	9.83e-06	-2.4618	down	AUX/IAA family	Auxin-responsive protein IAA3 OS=Oryza sativa subsp. japonica OX=39947 GN=IAA3 PE=2 SV=1	auxin-responsive protein IAA3 [Hordeum vulgare]	molecular function: nucleic acid binding transcription factor activity (GO:0001071);; biological process: biological regulation (GO:0065007);; biological process: response to stimulus (GO:0050896)	Plant hormone signal transduction (ko04075)
		Unigene_181041	IAA3	8.3e-07	-4.21234	down	5.72e-07	-4.07527	down	AUX/IAA family	Auxin-responsive protein IAA3 OS=Oryza sativa subsp. japonica OX=39947 GN=IAA3 PE=2 SV=1	auxin-responsive protein IAA3 [Hordeum vulgare]	molecular function: nucleic acid binding transcription factor activity (GO:0001071);; biological process: biological regulation (GO:0065007);; biological process: response to stimulus (GO:0050896)	Plant hormone signal transduction (ko04075)
		Unigene_514517	IAA5	0.958783	0.081909	normal	6.92e-07	-4.64729	down	AUX/IAA family	Auxin-responsive protein IAA5 OS=Oryza sativa subsp. japonica OX=39947 GN=IAA5 PE=2 SV=1	unnamed protein product [Triticum turgidum subsp. durum]	--	Plant hormone signal transduction (ko04075)
		Unigene_600635	IAA10	0.926065	-0.129012	normal	0.00179285	-4.00385	down	AUX/IAA family	Auxin-responsive protein IAA10 OS=Oryza sativa subsp. indica OX=39946 GN=IAA10 PE=2 SV=2	predicted protein [Hordeum vulgare subsp. vulgare]	biological process: multicellular organismal process (GO:0032501);; biological process: developmental process (GO:0032502);; biological process: single-organism process (GO:0044699);; molecular function: nucleic acid binding transcription factor activity (GO:0001071);; biological process: biological regulation (GO:0065007);; cellular component: cell (GO:0005623);; cellular component: cell part (G…	Plant hormone signal transduction (ko04075)
		Unigene_004469	IAA13	0.0181464	-1.71748	normal	0.000795702	-2.34855	down	AUX/IAA family	Auxin-responsive protein IAA13 OS=Oryza sativa subsp. indica OX=39946 GN=IAA13 PE=2 SV=1	hypothetical protein CFC21_073479 [Triticum aestivum]	biological process: response to stimulus (GO:0050896);; molecular function: nucleic acid binding transcription factor activity (GO:0001071);; biological process: biological regulation (GO:0065007);; molecular function: binding (GO:0005488);; cellular component: cell (GO:0005623);; cellular component: cell part (GO:0044464);; cellular component: organelle (GO:0043226);; biological process: cellula…	Plant hormone signal transduction (ko04075)
		Unigene_171556	IAA13	0.0053881	-2.41747	down	0.0100323	-2.30298	normal	AUX/IAA family	Auxin-responsive protein IAA13 OS=Oryza sativa subsp. indica OX=39946 GN=IAA13 PE=2 SV=1	hypothetical protein CFC21_073479 [Triticum aestivum]	biological process: response to stimulus (GO:0050896);; molecular function: nucleic acid binding transcription factor activity (GO:0001071);; biological process: biological regulation (GO:0065007);; molecular function: binding (GO:0005488);; cellular component: cell (GO:0005623);; cellular component: cell part (GO:0044464);; cellular component: organelle (GO:0043226);; biological process: cellula…	Plant hormone signal transduction (ko04075)
		Unigene_595988	IAA14	0.0209283	2.03166	normal	0.000125458	2.28068	up	AUX/IAA family	Auxin-responsive protein IAA14 OS=Oryza sativa subsp. japonica OX=39947 GN=IAA14 PE=2 SV=1	Auxin-responsive protein IAA14 [Triticum urartu]	biological process: response to stimulus (GO:0050896)	Plant hormone signal transduction (ko04075)
		Unigene_037723	IAA15	0.000913879	-2.28163	down	3.22e-08	-4.18214	down	--	Auxin-responsive protein IAA15 OS=Oryza sativa subsp. japonica OX=39947 GN=IAA15 PE=2 SV=1	Auxin-responsive protein IAA1 [Triticum urartu]	molecular function: nucleic acid binding transcription factor activity (GO:0001071);; biological process: biological regulation (GO:0065007);; molecular function: binding (GO:0005488);; cellular component: cell (GO:0005623);; cellular component: cell part (GO:0044464);; cellular component: organelle (GO:0043226);; biological process: cellular process (GO:0009987);; biological process: signaling (…	Plant hormone signal transduction (ko04075)
		Unigene_072896	IAA17	3.27e-05	-3.2548	down	0.00176185	-2.61367	down	AUX/IAA family	Auxin-responsive protein IAA17 OS=Oryza sativa subsp. japonica OX=39947 GN=IAA17 PE=2 SV=1	auxin-responsive protein IAA17 [Brachypodium distachyon]	molecular function: nucleic acid binding transcription factor activity (GO:0001071);; biological process: biological regulation (GO:0065007);; biological process: response to stimulus (GO:0050896)	Plant hormone signal transduction (ko04075)
		Unigene_513769	IAA17	0.071749	-1.95006	normal	9.27e-10	-7.13853	down	AUX/IAA family	Auxin-responsive protein IAA17 OS=Oryza sativa subsp. japonica OX=39947 GN=IAA17 PE=2 SV=1	hypothetical protein E2562_038089 [Oryza meyeriana var. granulata]	molecular function: nucleic acid binding transcription factor activity (GO:0001071);; biological process: biological regulation (GO:0065007);; biological process: response to stimulus (GO:0050896)	Plant hormone signal transduction (ko04075)
		Unigene_601173	IAA17	0.00746061	-1.85551	down	0.00083991	-1.7156	down	AUX/IAA family	Auxin-responsive protein IAA17 OS=Oryza sativa subsp. japonica OX=39947 GN=IAA17 PE=2 SV=1	auxin-responsive protein IAA17 [Brachypodium distachyon]	molecular function: nucleic acid binding transcription factor activity (GO:0001071);; biological process: biological regulation (GO:0065007);; biological process: response to stimulus (GO:0050896)	Plant hormone signal transduction (ko04075)
		Unigene_518704	IAA19	0.66482	-0.544432	normal	0.00198224	-3.30161	down	No apical meristem (NAM) protein	Auxin-responsive protein IAA19 OS=Oryza sativa subsp. japonica OX=39947 GN=IAA19 PE=2 SV=1	uncharacterized protein LOC100830721 [Brachypodium distachyon]	molecular function: binding (GO:0005488);; biological process: biological regulation (GO:0065007)	Glycine, serine and threonine metabolism (ko00260);; Monobactam biosynthesis (ko00261);; Cysteine and methionine metabolism (ko00270);; Lysine biosynthesis (ko00300);; 2-Oxocarboxylic acid metabolism (ko01210);; Biosynthesis of amino acids (ko01230)
		Unigene_020583	IAA21	0.00760792	-2.25578	down	2.95e-06	-5.40286	down	AUX/IAA family;; AUX/IAA family	Auxin-responsive protein IAA21 OS=Oryza sativa subsp. japonica OX=39947 GN=IAA21 PE=2 SV=1	hypothetical protein CFC21_098378 [Triticum aestivum]	molecular function: nucleic acid binding transcription factor activity (GO:0001071);; biological process: biological regulation (GO:0065007);; biological process: response to stimulus (GO:0050896)	Plant hormone signal transduction (ko04075)
		Unigene_599970	IAA21	0.0489934	-1.54167	normal	4.59e-09	-2.62997	down	AUX/IAA family	Auxin-responsive protein IAA21 OS=Oryza sativa subsp. japonica OX=39947 GN=IAA21 PE=2 SV=1	hypothetical protein CFC21_098378 [Triticum aestivum]	molecular function: nucleic acid binding transcription factor activity (GO:0001071);; biological process: biological regulation (GO:0065007);; biological process: response to stimulus (GO:0050896)	Plant hormone signal transduction (ko04075)
		Unigene_595487	IAA24	0.982162	-0.0371009	normal	0.000165986	-5.26945	down	AUX/IAA family	Auxin-responsive protein IAA24 OS=Oryza sativa subsp. japonica OX=39947 GN=IAA24 PE=2 SV=1	--	biological process: response to stimulus (GO:0050896)	Plant hormone signal transduction (ko04075)
		Unigene_186469	IAA30	0.585363	-0.708988	normal	0.00216617	-3.65926	down	AUX/IAA family	Auxin-responsive protein IAA30 OS=Oryza sativa subsp. japonica OX=39947 GN=IAA30 PE=2 SV=1	hypothetical protein CFC21_064325 [Triticum aestivum]	biological process: response to stimulus (GO:0050896);; molecular function: nucleic acid binding transcription factor activity (GO:0001071);; biological process: biological regulation (GO:0065007);; molecular function: binding (GO:0005488);; cellular component: cell (GO:0005623);; cellular component: cell part (GO:0044464);; cellular component: organelle (GO:0043226);; biological process: cellula…	Plant hormone signal transduction (ko04075)
		Unigene_603001	IAA30	0.912983	-0.156432	normal	9.03e-07	-5.76955	down	AUX/IAA family	Auxin-responsive protein IAA30 OS=Oryza sativa subsp. japonica OX=39947 GN=IAA30 PE=2 SV=1	unnamed protein product [Triticum turgidum subsp. durum]	biological process: response to stimulus (GO:0050896);; molecular function: nucleic acid binding transcription factor activity (GO:0001071);; biological process: biological regulation (GO:0065007);; molecular function: binding (GO:0005488);; cellular component: cell (GO:0005623);; cellular component: cell part (GO:0044464);; cellular component: organelle (GO:0043226);; biological process: cellula…	Plant hormone signal transduction (ko04075)
		Unigene_312572	IAA31	2.09283e-06	2.27604	up	0.000117036	2.23387	up	AUX/IAA family	Auxin-responsive protein IAA31 OS=Oryza sativa subsp. japonica OX=39947 GN=IAA31 PE=2 SV=1	predicted protein [Hordeum vulgare subsp. vulgare]	--	Plant hormone signal transduction (ko04075)
	Auxin transporter-like protein	Unigene_015424	Os01g0856500	0.818677	-0.316432	normal	2.83e-05	-4.12354	down	Transmembrane amino acid transporter protein	Auxin transporter-like protein 1 OS=Oryza sativa subsp. japonica OX=39947 GN=Os01g0856500 PE=2 SV=2	auxin transporter-like protein 1 [Brachypodium distachyon]	biological process: single-organism process (GO:0044699);; biological process: localization (GO:0051179);; molecular function: transporter activity (GO:0005215);; cellular component: cell (GO:0005623);; cellular component: membrane (GO:0016020);; cellular component: cell part (GO:0044464);; biological process: biological regulation (GO:0065007);; biological process: multicellular organismal proce…	Plant hormone signal transduction (ko04075)
		Unigene_015425	Os01g0856500	0.775181	-0.314515	normal	0.00781821	-1.57506	down	Transmembrane amino acid transporter protein	Auxin transporter-like protein 1 OS=Oryza sativa subsp. japonica OX=39947 GN=Os01g0856500 PE=2 SV=2	auxin transporter-like protein 1 [Brachypodium distachyon]	biological process: single-organism process (GO:0044699);; biological process: localization (GO:0051179);; molecular function: transporter activity (GO:0005215);; cellular component: cell (GO:0005623);; cellular component: membrane (GO:0016020);; cellular component: cell part (GO:0044464);; biological process: biological regulation (GO:0065007);; biological process: multicellular organismal proce…	Plant hormone signal transduction (ko04075)
	Auxin-responsive protein SAUR	Unigene_051416	SAUR71	3.89e-11	-6.76663	down	8.5e-06	-4.84031	down	Auxin responsive protein	Auxin-responsive protein SAUR71 OS=Arabidopsis thaliana OX=3702 GN=SAUR71 PE=2 SV=1	hypothetical protein CFC21_056107 [Triticum aestivum]	biological process: response to stimulus (GO:0050896)	Plant hormone signal transduction (ko04075)
		Unigene_166010	SAUR71	6.78e-13	-7.89272	down	2.63e-05	-5.27228	down	Auxin responsive protein	Auxin-responsive protein SAUR71 OS=Arabidopsis thaliana OX=3702 GN=SAUR71 PE=2 SV=1	auxin-responsive protein SAUR71-like [Aegilops tauschii subsp. tauschii]	biological process: response to stimulus (GO:0050896)	Plant hormone signal transduction (ko04075)
		Unigene_170451	SAUR39	4.16e-08	-5.44681	down	0.0387316	-2.88071	normal	Auxin responsive protein	Auxin-responsive protein SAUR36 OS=Oryza sativa subsp. japonica OX=39947 GN=SAUR39 PE=2 SV=1	auxin-responsive protein SAUR36-like [Hordeum vulgare]	cellular component: cell (GO:0005623);; cellular component: cell part (GO:0044464);; biological process: response to stimulus (GO:0050896);; biological process: biological regulation (GO:0065007)	Plant hormone signal transduction (ko04075)
		Unigene_299130	SAUR39	1.36e-08	-5.02706	down	0.375915	-0.936369	normal	Auxin responsive protein	Auxin-responsive protein SAUR36 OS=Oryza sativa subsp. japonica OX=39947 GN=SAUR39 PE=2 SV=1	auxin-responsive protein SAUR36-like [Hordeum vulgare]	cellular component: cell (GO:0005623);; cellular component: cell part (GO:0044464);; biological process: response to stimulus (GO:0050896);; biological process: biological regulation (GO:0065007)	Plant hormone signal transduction (ko04075)
		Unigene_505762	SAUR39	8.45e-10	-5.31295	down	6.14e-09	-8.89468	down	Auxin responsive protein	Auxin-responsive protein SAUR36 OS=Oryza sativa subsp. japonica OX=39947 GN=SAUR39 PE=2 SV=1	hypothetical protein CFC21_073027 [Triticum aestivum]	cellular component: cell (GO:0005623);; cellular component: cell part (GO:0044464);; biological process: response to stimulus (GO:0050896);; biological process: biological regulation (GO:0065007)	Plant hormone signal transduction (ko04075)
	Auxin-repressed 12.5 kDa protein	Unigene_170788	——	3.81e-12	-4.57522	down	0.0884526	-2.07025	normal	Dormancy/auxin associated protein	Auxin-repressed 12.5 kDa protein OS=Fragaria ananassa OX=3747 PE=2 SV=1	unnamed protein product [Triticum turgidum subsp. durum]	--	--
		Unigene_180435	——	3.86e-05	-3.23824	down	1.15e-10	-5.99527	down	Dormancy/auxin associated protein	Auxin-repressed 12.5 kDa protein OS=Fragaria ananassa OX=3747 PE=2 SV=1	dormancy-associated protein 1 [Brachypodium distachyon]	--	--
		Unigene_436055	——	0.000107771	-2.93312	down	7.4e-16	-8.60885	down	Dormancy/auxin associated protein	Auxin-repressed 12.5 kDa protein OS=Fragaria ananassa OX=3747 PE=2 SV=1	dormancy-associated protein 1 [Brachypodium distachyon]	--	--
		Unigene_586345	——	3.62e-05	-3.4882	down	0.00233306	-2.80071	down	Dormancy/auxin associated protein	Auxin-repressed 12.5 kDa protein OS=Fragaria ananassa OX=3747 PE=2 SV=1	predicted protein [Hordeum vulgare subsp. vulgare]	--	--
	Gretchen Hagen 3 (GH3)	Unigene_520253	GH3.7	0.0244412	-2.75895	normal	0.00316117	-3.62407	down	GH3 auxin-responsive promoter	Probable indole-3-acetic acid-amido synthetase GH3.7 OS=Oryza sativa subsp. japonica OX=39947 GN=GH3.7 PE=2 SV=2	hypothetical protein CFC21_061177 [Triticum aestivum]	molecular function: catalytic activity (GO:0003824);; cellular component: cell (GO:0005623);; cellular component: cell part (GO:0044464);; cellular component: organelle (GO:0043226);; biological process: response to stimulus (GO:0050896);; biological process: biological regulation (GO:0065007)	Plant hormone signal transduction (ko04075)
		Unigene_048431	GH3.12	0.045225	-2.31141	normal	0.00204857	-3.32485	down	GH3 auxin-responsive promoter	Probable indole-3-acetic acid-amido synthetase GH3.12 OS=Oryza sativa subsp. japonica OX=39947 GN=GH3.12 PE=2 SV=1	unnamed protein product [Triticum turgidum subsp. durum]	cellular component: cell (GO:0005623);; cellular component: cell part (GO:0044464);; biological process: response to stimulus (GO:0050896);; cellular component: organelle (GO:0043226)	Plant hormone signal transduction (ko04075)
		Unigene_074692	GH3.12	3.06e-11	-4.29891	down	1.71e-06	-4.95279	down	GH3 auxin-responsive promoter	Probable indole-3-acetic acid-amido synthetase GH3.12 OS=Oryza sativa subsp. japonica OX=39947 GN=GH3.12 PE=2 SV=1	unnamed protein product [Triticum turgidum subsp. durum]	cellular component: cell (GO:0005623);; cellular component: cell part (GO:0044464);; biological process: response to stimulus (GO:0050896);; cellular component: organelle (GO:0043226)	Plant hormone signal transduction (ko04075)
		Unigene_323729	GH3.12	0.0253559	-2.20551	normal	3.36e-06	-2.40272	down	GH3 auxin-responsive promoter	Probable indole-3-acetic acid-amido synthetase GH3.12 OS=Oryza sativa subsp. japonica OX=39947 GN=GH3.12 PE=2 SV=1	unnamed protein product [Triticum turgidum subsp. durum]	cellular component: cell (GO:0005623);; cellular component: cell part (GO:0044464);; biological process: response to stimulus (GO:0050896);; cellular component: organelle (GO:0043226)	Plant hormone signal transduction (ko04075)
		Unigene_604321	GH3.12	0.00185086	-2.95688	down	2.93e-11	-8.02434	down	GH3 auxin-responsive promoter	Probable indole-3-acetic acid-amido synthetase GH3.12 OS=Oryza sativa subsp. japonica OX=39947 GN=GH3.12 PE=2 SV=1	unnamed protein product [Triticum turgidum subsp. durum]	cellular component: cell (GO:0005623);; cellular component: cell part (GO:0044464);; biological process: response to stimulus (GO:0050896);; cellular component: organelle (GO:0043226)	Plant hormone signal transduction (ko04075)
Gibberellin (GA)	Gibberellin 2-beta-dioxygenase(GA2OX)	Unigene_075482	GA2OX3	0.474888	0.846988	normal	0.00838236	1.95608	up	2OG-Fe(II) oxygenase superfamily	Gibberellin 2-beta-dioxygenase 3 OS=Oryza sativa subsp. japonica OX=39947 GN=GA2OX3 PE=1 SV=1	GA2-oxidase 5 [Poa pratensis]	molecular function: catalytic activity (GO:0003824);; biological process: metabolic process (GO:0008152);; biological process: single-organism process (GO:0044699)	Diterpenoid biosynthesis (ko00904)
		Unigene_597997	GA2OX3	0.0017599	3.30103	up	--	--	--	2OG-Fe(II) oxygenase superfamily;; non-haem dioxygenase in morphine synthesis N-terminal	Gibberellin 2-beta-dioxygenase 3 OS=Oryza sativa subsp. japonica OX=39947 GN=GA2OX3 PE=1 SV=1	gibberellin 2-oxidase, partial [Lolium temulentum]	biological process: metabolic process (GO:0008152);; biological process: cellular process (GO:0009987);; biological process: single-organism process (GO:0044699);; biological process: response to stimulus (GO:0050896);; biological process: biological regulation (GO:0065007);; molecular function: catalytic activity (GO:0003824)	Diterpenoid biosynthesis (ko00904)
	Gibberellin receptor(GID)	Unigene_323547	GID1	0.00131356	2.01858	up	2.92e-09	3.05707	up	alpha/beta hydrolase fold;; Carboxylesterase family	Gibberellin receptor GID1 OS=Oryza sativa subsp. japonica OX=39947 GN=GID1 PE=1 SV=1	gibberellin-insensitive dwarf 1 [Lolium arundinaceum]	biological process: reproduction (GO:0000003);; biological process: response to stimulus (GO:0050896);; biological process: reproductive process (GO:0022414);; biological process: developmental process (GO:0032502);; molecular function: catalytic activity (GO:0003824);; molecular function: binding (GO:0005488);; cellular component: cell (GO:0005623);; cellular component: cell part (GO:0044464);; …	Plant hormone signal transduction (ko04075)
		Unigene_073212	GID1	0.0480651	1.26259	normal	3.96e-08	2.14992	up	alpha/beta hydrolase fold;; Carboxylesterase family	Gibberellin receptor GID1 OS=Oryza sativa subsp. japonica OX=39947 GN=GID1 PE=1 SV=1	gibberellin-insensitive dwarf 1 [Lolium arundinaceum]	biological process: reproduction (GO:0000003);; biological process: response to stimulus (GO:0050896);; biological process: reproductive process (GO:0022414);; biological process: developmental process (GO:0032502);; molecular function: catalytic activity (GO:0003824);; molecular function: binding (GO:0005488);; cellular component: cell (GO:0005623);; cellular component: cell part (GO:0044464);; …	Plant hormone signal transduction (ko04075)
	DELLA	Unigene_605746	RHT1	0.000933951	-2.12921	down	0.000922563	-3.9485	down	GRAS domain family;; Transcriptional regulator DELLA protein N terminal	DELLA protein RHT-1 OS=Triticum aestivum OX=4565 GN=RHT1 PE=1 SV=1	DELLA protein, partial [Psathyrostachys huashanica]	biological process: reproduction (GO:0000003);; biological process: cellular process (GO:0009987);; biological process: single-organism process (GO:0044699);; molecular function: binding (GO:0005488);; biological process: response to stimulus (GO:0050896);; molecular function: nucleic acid binding transcription factor activity (GO:0001071);; biological process: biological regulation (GO:0065007);…	Plant hormone signal transduction (ko04075)
Brassinosteroid (BR)	Brassinosteroid-responsive RING protein 1	Unigene_024667	BRH1	7.97606e-05	-3.37634	down	9.43e-05	-2.82216	down	Ring finger domain;; RING-H2 zinc finger domain;; RING-like zinc finger;; Anaphase-promoting complex subunit 11 RING-H2 finger;; Zinc finger, C3HC4 type (RING finger)	Brassinosteroid-responsive RING protein 1 OS=Arabidopsis thaliana OX=3702 GN=BRH1 PE=2 SV=1	unnamed protein product [Triticum turgidum subsp. durum]	--	--
	Brassinosteroid LRR receptor kinaseBRI1/ BRL1	Unigene_325606	BRL1	4.59944e-05	3.97484	up	0.00375941	2.06154	up	Leucine rich repeat;; Protein kinase domain;; Protein tyrosine and serine/threonine kinase;; Leucine Rich repeats (2 copies);; Leucine Rich Repeat;; Leucine rich repeat N-terminal domain;; Leucine Rich repeat	Brassinosteroid LRR receptor kinase BRL1 OS=Oryza sativa subsp. japonica OX=39947 GN=BRL1 PE=2 SV=1	brassinosteroid LRR receptor kinase BRL1 [Brachypodium distachyon]	molecular function: catalytic activity (GO:0003824);; biological process: metabolic process (GO:0008152);; biological process: cellular process (GO:0009987);; molecular function: binding (GO:0005488);; cellular component: cell (GO:0005623);; cellular component: membrane (GO:0016020);; cellular component: cell part (GO:0044464)	Plant hormone signal transduction (ko04075)
		Unigene_075747	BRI1	7.88644e-05	0.311455	normal	0.00865891	1.29407	up	Leucine rich repeat;; Protein kinase domain;; Protein tyrosine and serine/threonine kinase;; Leucine Rich repeats (2 copies);; Leucine Rich Repeat;; Leucine Rich repeat	Brassinosteroid LRR receptor kinase BRI1 OS=Oryza sativa subsp. japonica OX=39947 GN=BRI1 PE=1 SV=1	hypothetical protein CFC21_041712 [Triticum aestivum]	biological process: reproduction (GO:0000003);; biological process: cellular process (GO:0009987);; biological process: cellular component organization or biogenesis (GO:0071840);; biological process: reproductive process (GO:0022414);; biological process: developmental process (GO:0032502);; molecular function: catalytic activity (GO:0003824);; biological process: metabolic process (GO:0008152);…	Plant hormone signal transduction (ko04075)
Jasmonic acid (JA)	Gretchen Hagen 3 (GH3)	Unigene_323561	GH3.5	1.6704e-06	-3.05023	down	6.89e-05	-3.68889	down	GH3 auxin-responsive promoter	Jasmonoyl--L-amino acid synthetase GH3.5 OS=Oryza sativa subsp. japonica OX=39947 GN=GH3.5 PE=1 SV=1	hypothetical protein TRIUR3_31351 [Triticum urartu]	biological process: response to stimulus (GO:0050896)	Plant hormone signal transduction (ko04075)
		Unigene_526120	GH3.5	4.19698e-05	-3.91444	down	2.39e-09	-7.66175	down	GH3 auxin-responsive promoter;; GH3 auxin-responsive promoter	Jasmonoyl--L-amino acid synthetase GH3.5 OS=Oryza sativa subsp. japonica OX=39947 GN=GH3.5 PE=1 SV=1	unnamed protein product [Triticum turgidum subsp. durum]	biological process: response to stimulus (GO:0050896)	Plant hormone signal transduction (ko04075)
		Unigene_033617	GH3.5	8.02744e-05	-4.29615	down	2.27e-05	-4.90746	down	GH3 auxin-responsive promoter	Jasmonoyl--L-amino acid synthetase GH3.5 OS=Oryza sativa subsp. japonica OX=39947 GN=GH3.5 PE=1 SV=1	hypothetical protein TRIUR3_31351 [Triticum urartu]	biological process: response to stimulus (GO:0050896)	Plant hormone signal transduction (ko04075)

## Sheet: CO-induced
Hormone	Gene classification	ID	Gene name	R0_vs_R3_DESeq2_FDR	R0_vs_R3_DESeq2_log2FC	R0_vs_R3_regulated	R0_vs_R6_DESeq2_FDR	R0_vs_R6_DESeq2_log2FC	R0_vs_R6_regulated	S0_vs_S3_DESeq2_FDR	S0_vs_S3_DESeq2_log2FC	S0_vs_S3_regulated	S0_vs_S6_DESeq2_FDR	S0_vs_S6_DESeq2_log2FC	S0_vs_S6_regulated	L0_vs_L3_DESeq2_FDR	L0_vs_L3_DESeq2_log2FC	L0_vs_L3_regulated	L0_vs_L2_DESeq2_FDR	L0_vs_L6_DESeq2_log2FC	L0_vs_L6_DESeq2_(FDR_0.01_FC_2)_regulated	Pfam_annotation	Swissprot_annotation	TrEMBL_annotation	nr_annotation	GO_second_level_annotation	KEGG_pathway_annotation
Abscisic acid (ABA)	Abscisic acid (ABA)	Unigene_049978	ASR5	0.00971911	3.16611	up	0.172964	-1.0557	normal	0.177147	-1.90637	normal	0.00238199	-3.09985	down	1.53397e-05	-2.57336	down	6.23323e-05	-2.92265	down	ABA/WDS induced protein	Abscisic stress-ripening protein 5 OS=Oryza sativa subsp. indica OX=39946 GN=ASR5 PE=2 SV=1	Abcissic acid stress ripening OS=Hordeum vulgare OX=4513 GN=ASR1 PE=2 SV=1	abcissic acid stress ripening [Hordeum vulgare]	--	Plant hormone signal transduction (ko04075)
	Protein Phosphatase 2C (PP2C)	Unigene_600534	Os03g0292100	0.00396714	4.11503	up	0.349066	1.52047	normal	2.93266e-05	-5.39736	down	0.000950503	-2.69669	down	0.000476769	-4.66631	down	0.653213	-0.577045	normal	Protein phosphatase 2C;; Protein phosphatase 2C;; Stage II sporulation protein E (SpoIIE)	Probable protein phosphatase 2C 32 OS=Oryza sativa subsp. japonica OX=39947 GN=Os03g0292100 PE=2 SV=1	Protein-serine/threonine phosphatase OS=Triticum turgidum subsp. durum OX=4567 GN=TRITD_4Bv1G119780 PE=3 SV=1	unnamed protein product [Triticum turgidum subsp. durum]	molecular function: catalytic activity (GO:0003824)	Plant hormone signal transduction (ko04075)
		Unigene_325454	PP2C27	0.0547992	-1.70316	normal	0.000342438	-1.54157	down	0.000553768	3.92062	up	0.0147623	2.63139	normal	9.00651e-06	1.94781	up	0.103145	1.16297	normal	Protein phosphatase 2C	Probable protein phosphatase 2C 27 OS=Arabidopsis thaliana OX=3702 GN=PP2C27 PE=2 SV=1	Protein-serine/threonine phosphatase OS=Triticum urartu OX=4572 GN=TRIUR3_09117 PE=3 SV=1	putative protein phosphatase 2C 27 [Triticum urartu]	biological process: response to stimulus (GO:0050896);; molecular function: catalytic activity (GO:0003824);; cellular component: cell (GO:0005623);; cellular component: cell part (GO:0044464);; cellular component: organelle (GO:0043226);; biological process: biological regulation (GO:0065007);; biological process: cellular process (GO:0009987)	--
	serine/threonine-protein kinase (Ser/Thr-protein kinase)	Unigene_055925	CCR3	0.000828704	4.49733	up	0.106939	1.98101	normal	2.66671e-09	-5.84114	down	0.000370371	-4.02294	down	0.000435945	-4.69369	down	0.498048	-0.990662	normal	Protein kinase domain;; Protein tyrosine and serine/threonine kinase	Putative serine/threonine-protein kinase-like protein CCR3 OS=Arabidopsis thaliana OX=3702 GN=CCR3 PE=2 SV=1	Protein kinase domain-containing protein OS=Aegilops tauschii subsp. strangulata OX=200361 PE=4 SV=1	putative serine/threonine-protein kinase-like protein CCR3 [Aegilops tauschii subsp. tauschii]	molecular function: catalytic activity (GO:0003824);; biological process: metabolic process (GO:0008152);; biological process: cellular process (GO:0009987);; molecular function: binding (GO:0005488)	Plant-pathogen interaction (ko04626)
		Unigene_511495	CCR3	0.000670061	4.55572	up	0.0419729	2.74688	normal	0.000695959	-3.60956	down	0.11104	-2.06383	normal	1.36132e-05	-3.08947	down	0.830298	0.288765	normal	Protein kinase domain;; Protein tyrosine and serine/threonine kinase	Putative serine/threonine-protein kinase-like protein CCR3 OS=Arabidopsis thaliana OX=3702 GN=CCR3 PE=2 SV=1	Protein kinase domain-containing protein OS=Aegilops tauschii subsp. strangulata OX=200361 PE=4 SV=1	hypothetical protein CFC21_027231 [Triticum aestivum]	molecular function: catalytic activity (GO:0003824);; biological process: metabolic process (GO:0008152);; biological process: cellular process (GO:0009987);; molecular function: binding (GO:0005488)	--
		Unigene_003187	B120	0.00824035	3.49815	up	0.28737	1.13026	normal	6.31354e-05	-4.03888	down	0.000208513	-3.64521	down	0.000363945	-2.87354	down	0.31301	-0.893812	normal	Protein tyrosine and serine/threonine kinase;; Protein kinase domain;; D-mannose binding lectin;; S-locus glycoprotein domain;; PAN-like domain;; Domain of unknown function (DUF3403)	G-type lectin S-receptor-like serine/threonine-protein kinase B120 OS=Arabidopsis thaliana OX=3702 GN=B120 PE=2 SV=1	Receptor-like serine/threonine-protein kinase OS=Aegilops tauschii subsp. strangulata OX=200361 PE=3 SV=1	G-type lectin S-receptor-like serine/threonine-protein kinase B120 [Aegilops tauschii subsp. tauschii]	molecular function: catalytic activity (GO:0003824);; biological process: metabolic process (GO:0008152);; biological process: cellular process (GO:0009987);; biological process: reproduction (GO:0000003);; biological process: reproductive process (GO:0022414);; biological process: multicellular organismal process (GO:0032501);; biological process: single-organism process (GO:0044699);; biologica…	Plant hormone signal transduction (ko04075)
		Unigene_183090	RIPK	0.00148934	4.1186	up	0.0448133	2.37209	normal	0.00868076	-2.95513	down	0.150798	-2.11937	normal	2.16899e-05	-5.32599	down	0.913035	-0.179289	normal	Protein tyrosine and serine/threonine kinase;; Protein kinase domain;; Protein tyrosine and serine/threonine kinase;; Protein kinase domain	Serine/threonine-protein kinase RIPK OS=Arabidopsis thaliana OX=3702 GN=RIPK PE=1 SV=1	Protein kinase domain-containing protein OS=Triticum urartu OX=4572 PE=4 SV=1	hypothetical protein CFC21_111107 [Triticum aestivum]	molecular function: catalytic activity (GO:0003824);; biological process: metabolic process (GO:0008152);; biological process: cellular process (GO:0009987);; molecular function: binding (GO:0005488)	Plant hormone signal transduction (ko04075)
		Unigene_530453	At1g56140	0.00149232	4.13906	up	0.0999615	1.68018	normal	0.00303938	-3.00404	down	5.73805e-06	-3.16198	down	0.226265	-1.52136	normal	0.00647115	-2.4128	down	Protein kinase domain;; Protein tyrosine and serine/threonine kinase;; Malectin domain;; Leucine rich repeat;; Leucine Rich repeats (2 copies)	Probable LRR receptor-like serine/threonine-protein kinase At1g56140 OS=Arabidopsis thaliana OX=3702 GN=At1g56140 PE=2 SV=2	Protein kinase domain-containing protein OS=Triticum turgidum subsp. durum OX=4567 GN=TRITD_2Bv1G206930 PE=4 SV=1	unnamed protein product [Triticum turgidum subsp. durum]	molecular function: catalytic activity (GO:0003824);; biological process: metabolic process (GO:0008152);; biological process: cellular process (GO:0009987);; molecular function: binding (GO:0005488)	Plant hormone signal transduction (ko04075)
		Unigene_530560	At1g67720	0.0016596	4.12566	up	0.0379481	2.38039	normal	0.0428853	-2.25499	normal	0.00535327	-2.70124	down	0.00658462	-2.59293	down	0.929559	-0.122992	normal	Malectin-like domain;; Protein tyrosine and serine/threonine kinase;; Protein kinase domain;; Leucine Rich repeats (2 copies);; Leucine rich repeat;; ABC-2 type transporter;; ABC transporter;; ABC-2 type transporter	Probable LRR receptor-like serine/threonine-protein kinase At1g67720 OS=Arabidopsis thaliana OX=3702 GN=At1g67720 PE=1 SV=1	Protein kinase domain-containing protein OS=Triticum aestivum OX=4565 PE=4 SV=1	hypothetical protein BRADI_2g62670v3 [Brachypodium distachyon]	molecular function: catalytic activity (GO:0003824);; biological process: metabolic process (GO:0008152);; biological process: cellular process (GO:0009987);; molecular function: binding (GO:0005488);; cellular component: membrane (GO:0016020)	MAPK signaling pathway - plant (ko04016);; Plant-pathogen interaction (ko04626)
		Unigene_529962	At1g06840	0.000305047	5.32579	up	0.132462	2.30886	normal	0.00882957	-3.02868	down	0.00213872	-2.93058	down	1.58986e-06	-6.3805	down	0.146254	-1.52144	normal	Leucine rich repeat;; Leucine Rich repeats (2 copies);; Leucine rich repeat N-terminal domain;; Leucine Rich Repeat	Probable LRR receptor-like serine/threonine-protein kinase At1g06840 OS=Arabidopsis thaliana OX=3702 GN=At1g06840 PE=1 SV=2	Protein kinase domain-containing protein OS=Triticum turgidum subsp. durum OX=4567 GN=TRITD_7Bv1G011340 PE=3 SV=1	unnamed protein product [Triticum turgidum subsp. durum]	molecular function: binding (GO:0005488);; cellular component: cell (GO:0005623);; cellular component: membrane (GO:0016020);; cellular component: cell part (GO:0044464)	--
		Unigene_176383	At2g19130	0.00883179	2.688	up	0.110485	1.77502	normal	0.00594566	-3.03179	down	2.68719e-05	-3.3439	down	2.29876e-09	-3.50131	down	0.0335055	-1.75977	normal	Protein kinase domain;; Protein tyrosine and serine/threonine kinase;; D-mannose binding lectin;; PAN-like domain;; S-locus glycoprotein domain	G-type lectin S-receptor-like serine/threonine-protein kinase At2g19130 OS=Arabidopsis thaliana OX=3702 GN=At2g19130 PE=2 SV=1	Receptor-like serine/threonine-protein kinase OS=Triticum urartu OX=4572 PE=3 SV=1	unnamed protein product [Triticum turgidum subsp. durum]	molecular function: catalytic activity (GO:0003824);; biological process: metabolic process (GO:0008152);; biological process: cellular process (GO:0009987);; molecular function: binding (GO:0005488);; biological process: reproduction (GO:0000003);; biological process: reproductive process (GO:0022414);; biological process: multicellular organismal process (GO:0032501);; biological process: singl…	Spliceosome (ko03040);; Protein processing in endoplasmic reticulum (ko04141);; Endocytosis (ko04144)
		Unigene_529503	WNK8	0.000111092	5.49901	up	0.0799796	2.34874	normal	0.769894	-0.375853	normal	0.00512557	-1.83802	down	1.49571e-05	-3.12836	down	0.304373	-0.889036	normal	Protein kinase domain;; Protein tyrosine and serine/threonine kinase	Probable serine/threonine-protein kinase WNK8 OS=Oryza sativa subsp. japonica OX=39947 GN=WNK8 PE=2 SV=1	Non-specific serine/threonine protein kinase OS=Triticum aestivum OX=4565 GN=FLR PE=2 SV=1	mitogen-activated protein kinase [Triticum aestivum]	biological process: reproduction (GO:0000003);; biological process: reproductive process (GO:0022414);; biological process: developmental process (GO:0032502);; molecular function: catalytic activity (GO:0003824);; biological process: metabolic process (GO:0008152);; biological process: cellular process (GO:0009987);; molecular function: binding (GO:0005488);; cellular component: cell (GO:0005623…	--
		Unigene_528652	ALE2	0.00160784	4.38069	up	0.166541	2.22405	normal	0.00262866	-3.48908	down	0.07086	-2.69688	normal	0.009407	-2.68803	down	0.707878	-0.577598	normal	Protein kinase domain;; Protein tyrosine and serine/threonine kinase	Receptor-like serine/threonine-protein kinase ALE2 OS=Arabidopsis thaliana OX=3702 GN=ALE2 PE=1 SV=1	Predicted protein OS=Hordeum vulgare subsp. vulgare OX=112509 PE=2 SV=1	predicted protein [Hordeum vulgare subsp. vulgare]	biological process: reproduction (GO:0000003);; biological process: reproductive process (GO:0022414);; biological process: developmental process (GO:0032502);; molecular function: catalytic activity (GO:0003824);; biological process: metabolic process (GO:0008152);; biological process: cellular process (GO:0009987);; molecular function: signal transducer activity (GO:0004871);; molecular functio…	Plant-pathogen interaction (ko04626)
		Unigene_176072	SAPK2	0.720894	-0.730955	normal	0.00835036	-1.1037	down	--	--	--	1.47829e-07	9.23889	up	5.79852e-06	2.04717	up	0.305934	0.925643	normal	Protein kinase domain;; Protein tyrosine and serine/threonine kinase	Serine/threonine-protein kinase SAPK2 OS=Oryza sativa subsp. indica OX=39946 GN=SAPK2 PE=2 SV=2	Protein kinase domain-containing protein OS=Aegilops tauschii subsp. strangulata OX=200361 PE=3 SV=1	serine/threonine-protein kinase SAPK2 [Aegilops tauschii subsp. tauschii]	biological process: response to stimulus (GO:0050896);; molecular function: catalytic activity (GO:0003824);; biological process: metabolic process (GO:0008152);; biological process: cellular process (GO:0009987);; molecular function: binding (GO:0005488);; cellular component: cell (GO:0005623);; cellular component: cell part (GO:0044464);; cellular component: organelle (GO:0043226);; biological …	MAPK signaling pathway - plant (ko04016);; Plant hormone signal transduction (ko04075)
	CytochromeP450(CYP450)	Unigene_004795	At4g17280	0.000107065	5.51295	up	0.0604645	2.91114	normal	0.00118112	-3.85878	down	0.156324	-2.51666	normal	1.13479e-05	-5.99253	down	0.822561	-0.365076	normal	Protein of unknown function (DUF568);; Eukaryotic cytochrome b561	Cytochrome b561 and DOMON domain-containing protein At4g17280 OS=Arabidopsis thaliana OX=3702 GN=At4g17280 PE=2 SV=1	Uncharacterized protein OS=Hordeum vulgare subsp. vulgare OX=112509 PE=4 SV=1	predicted protein [Hordeum vulgare subsp. vulgare]	--	--
		Unigene_512430	CYP72A14	0.00161343	4.5013	up	0.0442685	2.93855	normal	0.120875	-2.30141	normal	0.00740841	-3.88533	down	2.47729e-06	-6.32999	down	0.0103228	-2.14353	normal	Cytochrome P450	Cytochrome P450 72A14 OS=Arabidopsis thaliana OX=3702 GN=CYP72A14 PE=2 SV=1	Uncharacterized protein OS=Triticum turgidum subsp. durum OX=4567 GN=TRITD_1Av1G000490 PE=3 SV=1	unnamed protein product [Triticum turgidum subsp. durum]	molecular function: binding (GO:0005488);; molecular function: catalytic activity (GO:0003824);; biological process: metabolic process (GO:0008152);; biological process: single-organism process (GO:0044699)	--
		Unigene_012879	CYP94A2	0.00693343	2.94926	up	0.379748	0.834006	normal	0.00883396	-2.95717	down	0.0089606	-2.81298	down	0.000149228	-2.65594	down	0.0785098	-1.43233	normal	Cytochrome P450	Cytochrome P450 94A2 OS=Vicia sativa OX=3908 GN=CYP94A2 PE=2 SV=1	Uncharacterized protein OS=Triticum turgidum subsp. durum OX=4567 GN=TRITD_1Bv1G141930 PE=3 SV=1	unnamed protein product [Triticum turgidum subsp. durum]	molecular function: binding (GO:0005488);; molecular function: catalytic activity (GO:0003824);; biological process: metabolic process (GO:0008152);; biological process: single-organism process (GO:0044699)	Cutin, suberine and wax biosynthesis (ko00073)
		Unigene_598721	CYP709B2	5.11743e-06	6.05419	up	0.00983812	3.40836	up	4.78824e-05	-4.75248	down	0.0722917	-2.62794	normal	0.00978255	-4.04928	down	0.675922	0.626844	normal	Cytochrome P450	Cytochrome P450 709B2 OS=Arabidopsis thaliana OX=3702 GN=CYP709B2 PE=2 SV=1	Uncharacterized protein OS=Aegilops tauschii subsp. strangulata OX=200361 PE=3 SV=1	cytochrome P450 709B1-like [Aegilops tauschii subsp. tauschii]	biological process: response to stimulus (GO:0050896);; molecular function: catalytic activity (GO:0003824);; biological process: metabolic process (GO:0008152);; biological process: single-organism process (GO:0044699);; molecular function: binding (GO:0005488)	Plant hormone signal transduction (ko04075)
Ethylene （ETH）	Ethylene response factor(ERF)	Unigene_008513	RAP2-12	0.000445704	4.99963	up	0.332678	1.23551	normal	0.00237079	-3.3075	down	0.00272687	-3.28005	down	0.000224285	-3.14941	down	2.91928e-05	-2.57918	down	AP2 domain	Ethylene-responsive transcription factor RAP2-12 OS=Arabidopsis thaliana OX=3702 GN=RAP2-12 PE=1 SV=1	AP2/ERF domain-containing protein OS=Hordeum vulgare subsp. vulgare OX=112509 PE=4 SV=1	Ethylene-responsive transcription factor RAP2-3 [Hordeum vulgare]	molecular function: nucleic acid binding transcription factor activity (GO:0001071);; biological process: biological regulation (GO:0065007)	Plant hormone signal transduction (ko04075)
		Unigene_518350	ERF2	0.000836551	4.40048	up	0.0783133	2.20148	normal	6.03697e-06	-5.04974	down	7.75136e-05	-3.87811	down	3.22023e-09	-5.68535	down	0.00537285	-2.66426	down	AP2 domain	Ethylene-responsive transcription factor 2 OS=Nicotiana sylvestris OX=4096 GN=ERF2 PE=2 SV=1	Ethylene-responsive factor OS=Thinopyrum intermedium OX=85679 GN=ERF1 PE=2 SV=1	ethylene-responsive factor [Thinopyrum intermedium]	biological process: cellular process (GO:0009987);; biological process: signaling (GO:0023052);; biological process: single-organism process (GO:0044699);; biological process: response to stimulus (GO:0050896);; biological process: biological regulation (GO:0065007);; biological process: immune system process (GO:0002376);; molecular function: nucleic acid binding transcription factor activity (G…	Plant hormone signal transduction (ko04075)
		Unigene_064917	ERF4	0.000245309	5.17606	up	0.0429444	3.01829	normal	0.000315783	-3.9302	down	0.0133391	-2.87444	normal	2.83053e-11	-6.80909	down	0.296001	-1.11381	normal	AP2 domain	Ethylene-responsive transcription factor 4 OS=Arabidopsis thaliana OX=3702 GN=ERF4 PE=1 SV=1	Predicted protein OS=Hordeum vulgare subsp. vulgare OX=112509 PE=2 SV=1	ethylene-responsive factor-like transcription factor ERFL2b [Hordeum vulgare]	molecular function: nucleic acid binding transcription factor activity (GO:0001071);; biological process: biological regulation (GO:0065007)	--
		Unigene_597634	ERF4	0.00195483	4.26006	up	0.149051	2.45559	normal	0.00529487	-3.46884	down	0.138671	-2.62304	normal	1.23059e-06	-7.28308	down	0.594527	-0.78951	normal	--	Ethylene-responsive transcription factor 4 OS=Arabidopsis thaliana OX=3702 GN=ERF4 PE=1 SV=1	Ethylene-responsive transcription factor 3 OS=Agropyron mongolicum OX=37717 GN=AmERF3 PE=2 SV=1	ethylene-responsive transcription factor 3 [Agropyron mongolicum]	--	--
		Unigene_197025	EREBP1	2.05635e-07	7.93022	up	--	--	--	0.00150278	-4.20123	down	0.154173	-2.3452	normal	0.00024608	-4.26784	down	0.925747	0.146937	normal	AP2 domain	Ethylene-responsive transcription factor 1 OS=Oryza sativa subsp. japonica OX=39947 GN=EREBP1 PE=1 SV=1	AP2/ERF domain-containing protein OS=Hordeum vulgare subsp. vulgare OX=112509 PE=4 SV=1	Ethylene-responsive transcription factor RAP2-3 [Hordeum vulgare]	molecular function: nucleic acid binding transcription factor activity (GO:0001071);; biological process: biological regulation (GO:0065007)	--
Auxin(IAA)	Auxin(IAA)	Unigene_518704	IAA19	0.00299369	4.13356	up	0.0642982	2.14384	normal	0.00623287	-2.99659	down	0.0442616	-2.14223	normal	0.00198224	-3.30161	down	0.66482	-0.544432	normal	No apical meristem (NAM) protein	Auxin-responsive protein IAA19 OS=Oryza sativa subsp. japonica OX=39947 GN=IAA19 PE=2 SV=1	Uncharacterized protein OS=Aegilops tauschii subsp. strangulata OX=200361 PE=4 SV=1	uncharacterized protein LOC100830721 [Brachypodium distachyon]	molecular function: binding (GO:0005488);; biological process: biological regulation (GO:0065007)	Glycine, serine and threonine metabolism (ko00260);; Monobactam biosynthesis (ko00261);; Cysteine and methionine metabolism (ko00270);; Lysine biosynthesis (ko00300);; 2-Oxocarboxylic acid metabolism (ko01210);; Biosynthesis of amino acids (ko01230)
		Unigene_180435	——	1.45973e-11	10.3582	up	--	--	--	0.539337	0.924539	normal	0.00381345	-3.88522	down	1.14849e-10	-5.99527	down	3.85643e-05	-3.23824	down	Dormancy/auxin associated protein	Auxin-repressed 12.5 kDa protein OS=Fragaria ananassa OX=3747 PE=2 SV=1	Uncharacterized protein OS=Brachypodium distachyon OX=15368 GN=100841606 PE=3 SV=1	dormancy-associated protein 1 [Brachypodium distachyon]	--	--
Gibberellin	Gibberellin	Unigene_197103	CIGR2	0.494577	-1.19289	normal	0.00015691	-1.15007	down	--	--	--	1.07877e-07	6.95485	up	1.01009e-05	1.86575	up	0.172734	0.993706	normal	GRAS domain family	Chitin-inducible gibberellin-responsive protein 2 OS=Oryza sativa subsp. japonica OX=39947 GN=CIGR2 PE=2 SV=1	GRAS domain-containing protein OS=Brachypodium distachyon OX=15368 GN=100831355 PE=3 SV=1	scarecrow-like protein 21 [Brachypodium distachyon]	molecular function: binding (GO:0005488);; molecular function: nucleic acid binding transcription factor activity (GO:0001071);; biological process: biological regulation (GO:0065007);; cellular component: cell (GO:0005623);; cellular component: cell part (GO:0044464);; cellular component: organelle (GO:0043226);; biological process: cellular process (GO:0009987);; biological process: signaling (…	Plant hormone signal transduction (ko04075)
		Unigene_602170	CIGR2	0.000364966	5.28729	up	0.0462024	3.21327	normal	0.00177789	-4.36644	down	0.495799	-1.50974	normal	0.000151341	-5.87155	down	0.520341	0.931659	normal	GRAS domain family	Chitin-inducible gibberellin-responsive protein 2 OS=Oryza sativa subsp. japonica OX=39947 GN=CIGR2 PE=2 SV=1	GRAS domain-containing protein OS=Triticum turgidum subsp. durum OX=4567 GN=TRITD_2Bv1G076890 PE=3 SV=1	unnamed protein product [Triticum turgidum subsp. durum]	molecular function: binding (GO:0005488);; molecular function: nucleic acid binding transcription factor activity (GO:0001071);; biological process: biological regulation (GO:0065007);; cellular component: cell (GO:0005623);; cellular component: cell part (GO:0044464);; cellular component: organelle (GO:0043226)	Plant hormone signal transduction (ko04075)
		Unigene_529541	CIGR2	6.16738e-05	5.94412	up	0.139658	2.43751	normal	5.30422e-06	-5.10658	down	0.0498743	-3.39502	normal	0.00478096	-4.90488	down	0.817892	-0.419286	normal	GRAS domain family	Chitin-inducible gibberellin-responsive protein 2 OS=Oryza sativa subsp. japonica OX=39947 GN=CIGR2 PE=2 SV=1	GRAS domain-containing protein OS=Triticum turgidum subsp. durum OX=4567 GN=TRITD_2Bv1G076890 PE=3 SV=1	unnamed protein product [Triticum turgidum subsp. durum]	molecular function: binding (GO:0005488);; molecular function: nucleic acid binding transcription factor activity (GO:0001071);; biological process: biological regulation (GO:0065007);; cellular component: cell (GO:0005623);; cellular component: cell part (GO:0044464);; cellular component: organelle (GO:0043226)	Plant hormone signal transduction (ko04075)
