# Supplementary material for: Tissue-Specific Transcriptomic Analysis Reveals the Response Mechanism of Cold Stress in Poa crymophila, a Native Grass in Qinghai-Tibet Plateau
Source: Preprints.org preprint supplement (doi:10.20944/preprints202311.0336.v1), 2023-11-06
Supplement: Supplementary file 5 [file Table S11 Differently expressed genes related to the circadian clocks and photosynthesis of roots, stems and leaves under cold stress.xlsx]

## Sheet: Roots
Table S11 Differently expressed genes related to the circadian clocks and photosynthesis of roots, stems and leaves under cold stress.
Gene classification	Fuction categories	ID	Gene name	R0_vs_R3_DESeq2_FDR	R0_vs_R3_DESeq2_log2FC	R0_vs_R3_regulated	R0_vs_R6_DESeq2_FDR	R0_vs_R6_DESeq2_log2FC	R0_vs_R6_regulated	Pfam_annotation	Swissprot_annotation	nr_annotation	GO_second_level_annotation	KEGG_pathway_annotation
Circadian clocks	pseudo-response regulator (PRR)	Unigene_523659	PRR37	5.96829e-05	2.92941	up	--	--	--	CCT motif;; Response regulator receiver domain	Two-component response regulator-like PRR37 OS=Oryza sativa subsp. indica OX=39946 GN=PRR37 PE=2 SV=2	pseudo-response regulator [Triticum monococcum subsp. aegilopoides]	biological process: cellular process (GO:0009987);; biological process: signaling (GO:0023052);; biological process: single-organism process (GO:0044699);; biological process: response to stimulus (GO:0050896);; biological process: biological regulation (GO:0065007);; molecular function: binding (GO:0005488);; cellular component: cell (GO:0005623);; cellular component: cell part (GO:0044464);; ce…	Circadian rhythm - plant (ko04712)
	Protein LHY	Unigene_522697	LHY	0.0245522	3.65846	normal	0.00633731	5.70427	up	Myb-like DNA-binding domain	Protein LHY OS=Arabidopsis thaliana OX=3702 GN=LHY PE=1 SV=2	LHY [Avena sativa]	biological process: reproduction (GO:0000003);; molecular function: binding (GO:0005488);; biological process: response to stimulus (GO:0050896);; biological process: reproductive process (GO:0022414);; biological process: developmental process (GO:0032502);; molecular function: nucleic acid binding transcription factor activity (GO:0001071);; biological process: biological regulation (GO:0065007…	Circadian rhythm - plant (ko04712)
		Unigene_604770	LHY	0.00701641	3.39615	up	0.0104557	3.33034	normal	Myb-like DNA-binding domain	Protein LHY OS=Arabidopsis thaliana OX=3702 GN=LHY PE=1 SV=2	LHY [Avena sativa]	biological process: reproduction (GO:0000003);; molecular function: binding (GO:0005488);; biological process: response to stimulus (GO:0050896);; biological process: reproductive process (GO:0022414);; biological process: developmental process (GO:0032502);; molecular function: nucleic acid binding transcription factor activity (GO:0001071);; biological process: biological regulation (GO:0065007…	Circadian rhythm - plant (ko04712)
	Phytochrome A	Unigene_197967	PHYA3	0.00119236	3.38808	up	0.000137448	4.98399	up	Phytochrome region;; PAS fold;; PAS fold;; GAF domain;; Histidine kinase-, DNA gyrase B-, and HSP90-like ATPase;; PAS domain;; His Kinase A (phospho-acceptor) domain;; PAS fold;; PAS domain	Phytochrome A type 3 OS=Avena sativa OX=4498 GN=PHYA3 PE=1 SV=3	phytochrome [Avena sativa]	molecular function: catalytic activity (GO:0003824);; molecular function: signal transducer activity (GO:0004871);; molecular function: molecular transducer activity (GO:0060089);; biological process: metabolic process (GO:0008152);; biological process: cellular process (GO:0009987);; biological process: signaling (GO:0023052);; biological process: single-organism process (GO:0044699);; biologica…	Circadian rhythm - plant (ko04712)
		Unigene_313862	EID1	0.00390802	-2.43098	down	0.165	-1.8057	normal	--	Phytochrome A-associated F-box protein OS=Arabidopsis thaliana OX=3702 GN=EID1 PE=1 SV=2	phytochrome A-associated F-box protein [Aegilops tauschii subsp. tauschii]	biological process: reproduction (GO:0000003);; biological process: reproductive process (GO:0022414);; biological process: developmental process (GO:0032502);; molecular function: catalytic activity (GO:0003824);; biological process: metabolic process (GO:0008152);; biological process: cellular process (GO:0009987);; cellular component: cell (GO:0005623);; cellular component: cell part (GO:00444…	--
	Transcription factor HY5	Unigene_179960	HY5	1.00179e-05	-2.30291	down	0.597721	-1.1478	normal	bZIP transcription factor;; Basic region leucine zipper	Transcription factor HY5 OS=Solanum lycopersicum OX=4081 GN=HY5 PE=2 SV=1	unnamed protein product [Triticum aestivum]	molecular function: nucleic acid binding transcription factor activity (GO:0001071);; biological process: biological regulation (GO:0065007)	Circadian rhythm - plant (ko04712)
		Unigene_314013	HY5	3.75871e-07	-4.33569	down	0.0858466	-2.26565	normal	--	Transcription factor HY5 OS=Solanum lycopersicum OX=4081 GN=HY5 PE=2 SV=1	hypothetical protein GIB67_001124 [Kingdonia uniflora]	molecular function: binding (GO:0005488);; molecular function: nucleic acid binding transcription factor activity (GO:0001071);; biological process: biological regulation (GO:0065007);; cellular component: cell (GO:0005623);; cellular component: cell part (GO:0044464);; cellular component: organelle (GO:0043226)	Circadian rhythm - plant (ko04712)
photosynthesis	Electron transport chain	Unigene_066593	FDX6	0.000555932	-2.21648	down	0.621562	-1.1292	normal	2Fe-2S iron-sulfur cluster binding domain	Ferredoxin-6, chloroplastic OS=Zea mays OX=4577 GN=FDX6 PE=2 SV=1	ferredoxin-6, chloroplastic [Brachypodium distachyon]	molecular function: electron carrier activity (GO:0009055);; molecular function: binding (GO:0005488)	Photosynthesis (ko00195)
		Unigene_183317	FDX3	0.157431	2.43738	normal	0.00021918	5.43698	up	2Fe-2S iron-sulfur cluster binding domain	Ferredoxin-3, chloroplastic OS=Zea mays OX=4577 GN=FDX3 PE=1 SV=1	ferredoxin-3, chloroplastic [Brachypodium distachyon]	molecular function: electron carrier activity (GO:0009055);; molecular function: binding (GO:0005488)	Photosynthesis (ko00195)
	light reaction	Unigene_578930	psbM	0.00205602	-2.40201	down	0.129515	-1.68988	normal	--	Photosystem II reaction center protein M OS=Aethionema cordifolium OX=434059 GN=psbM PE=3 SV=1	photosystem II M protein [Oryza sativa Indica Group]	cellular component: cell (GO:0005623);; cellular component: membrane (GO:0016020);; cellular component: macromolecular complex (GO:0032991);; cellular component: membrane part (GO:0044425);; cellular component: cell part (GO:0044464);; biological process: metabolic process (GO:0008152);; biological process: cellular process (GO:0009987)	Photosynthesis (ko00195)
	Photosystem II	Unigene_605469	psbC	0.243046	1.98196	normal	0.00931289	3.68063	up	Photosystem II protein;; DnaJ domain;; Domain of unknown function (DUF1977);; Photosynthetic reaction centre protein;; Photosystem II 4 kDa reaction centre component;; YCF9;; Photosystem II reaction centre I protein (PSII 4.8 kDa protein)	Photosystem II CP43 reaction center protein OS=Agrostis stolonifera OX=63632 GN=psbC PE=3 SV=1	photosystem II CP43 chlorophyll apoprotein, partial [Triticum timopheevii]	cellular component: cell (GO:0005623);; cellular component: membrane (GO:0016020);; cellular component: macromolecular complex (GO:0032991);; cellular component: membrane part (GO:0044425);; cellular component: cell part (GO:0044464);; biological process: metabolic process (GO:0008152);; biological process: cellular process (GO:0009987);; biological process: single-organism process (GO:0044699);;…	Photosynthesis (ko00195)
	Delta-aminolevulinic acid dehydratase (ALAD)	Unigene_598680	HEMB	0.0495503	2.10147	normal	0.00209892	3.85515	up	Delta-aminolevulinic acid dehydratase;; Delta-aminolevulinic acid dehydratase	Delta-aminolevulinic acid dehydratase, chloroplastic OS=Oryza sativa subsp. japonica OX=39947 GN=HEMB PE=2 SV=1	delta-aminolevulinic acid dehydratase, chloroplastic [Aegilops tauschii subsp. tauschii]	molecular function: catalytic activity (GO:0003824);; molecular function: binding (GO:0005488);; cellular component: cell (GO:0005623);; cellular component: cell part (GO:0044464);; biological process: metabolic process (GO:0008152);; biological process: cellular process (GO:0009987);; biological process: single-organism process (GO:0044699);; cellular component: organelle (GO:0043226);; cellular…	Porphyrin and chlorophyll metabolism (ko00860)
	Porphobilinogen deaminase (PBGD)	Unigene_602544	HEMC	--	--	--	0.00522555	3.62404	up	Porphobilinogen deaminase, dipyromethane cofactor binding domain;; Porphobilinogen deaminase, C-terminal domain	Porphobilinogen deaminase, chloroplastic OS=Oryza sativa subsp. japonica OX=39947 GN=HEMC PE=2 SV=1	porphobilinogen deaminase, chloroplastic [Brachypodium distachyon]	molecular function: catalytic activity (GO:0003824);; cellular component: extracellular region (GO:0005576);; cellular component: cell (GO:0005623);; cellular component: cell part (GO:0044464);; biological process: metabolic process (GO:0008152);; biological process: cellular process (GO:0009987);; biological process: single-organism process (GO:0044699);; biological process: response to stimulus…	Porphyrin and chlorophyll metabolism (ko00860)

## Sheet: Stems
Gene classification	Fuction categories	ID	Gene name	S0_vs_S3_DESeq2_FDR	S0_vs_S3_DESeq2_log2FC	S0_vs_S3_regulated	S0_vs_S6_DESeq2_FDR	S0_vs_S6_DESeq2_log2FC	S0_vs_S6_regulated	Pfam_annotation	Swissprot_annotation	nr_annotation	GO_second_level_annotation	KEGG_pathway_annotation
Circadian clocks	pseudo-response regulator (PRR)	Unigene_073840	APRR5	--	--	--	4.73938e-09	10.2458	up	Response regulator receiver domain;; CCT motif	Two-component response regulator-like APRR5 OS=Arabidopsis thaliana OX=3702 GN=APRR5 PE=1 SV=2	two-component response regulator [Avena sativa]	biological process: cellular process (GO:0009987);; biological process: signaling (GO:0023052);; biological process: single-organism process (GO:0044699);; biological process: response to stimulus (GO:0050896);; biological process: biological regulation (GO:0065007);; molecular function: binding (GO:0005488)	Circadian rhythm - plant (ko04712)
		Unigene_058221	PRR1	1.75787e-05	5.22632	up	0.000360318	4.5388	up	Response regulator receiver domain	Two-component response regulator-like PRR1 OS=Oryza sativa subsp. japonica OX=39947 GN=PRR1 PE=1 SV=2	timing of cab expression 1 [Triticum aestivum]	biological process: cellular process (GO:0009987);; biological process: signaling (GO:0023052);; biological process: single-organism process (GO:0044699);; biological process: response to stimulus (GO:0050896);; biological process: biological regulation (GO:0065007);; molecular function: binding (GO:0005488);; molecular function: nucleic acid binding transcription factor activity (GO:0001071);; c…	Circadian rhythm - plant (ko04712)
		Unigene_198044	PRR1	0.00199998	3.02484	up	0.00608911	2.30724	up	CCT motif;; Response regulator receiver domain	Two-component response regulator-like PRR1 OS=Oryza sativa subsp. japonica OX=39947 GN=PRR1 PE=1 SV=2	hypothetical protein CFC21_092848 [Triticum aestivum]	biological process: cellular process (GO:0009987);; biological process: signaling (GO:0023052);; biological process: single-organism process (GO:0044699);; biological process: response to stimulus (GO:0050896);; biological process: biological regulation (GO:0065007);; molecular function: binding (GO:0005488);; molecular function: nucleic acid binding transcription factor activity (GO:0001071);; c…	Circadian rhythm - plant (ko04712)
		Unigene_071040	PRR37	0.001365	4.23195	up	0.0188992	2.98555	normal	Response regulator receiver domain;; CCT motif	Two-component response regulator-like PRR37 OS=Oryza sativa subsp. indica OX=39946 GN=PRR37 PE=2 SV=2	unnamed protein product [Triticum turgidum subsp. durum]	biological process: cellular process (GO:0009987);; biological process: signaling (GO:0023052);; biological process: single-organism process (GO:0044699);; biological process: response to stimulus (GO:0050896);; biological process: biological regulation (GO:0065007);; molecular function: binding (GO:0005488);; cellular component: cell (GO:0005623);; cellular component: cell part (GO:0044464);; ce…	Circadian rhythm - plant (ko04712)
		Unigene_523659	PRR37	0.0119674	-2.56277	normal	0.000345917	-2.98842	down	CCT motif;; Response regulator receiver domain	Two-component response regulator-like PRR37 OS=Oryza sativa subsp. indica OX=39946 GN=PRR37 PE=2 SV=2	pseudo-response regulator [Triticum monococcum subsp. aegilopoides]	biological process: cellular process (GO:0009987);; biological process: signaling (GO:0023052);; biological process: single-organism process (GO:0044699);; biological process: response to stimulus (GO:0050896);; biological process: biological regulation (GO:0065007);; molecular function: binding (GO:0005488);; cellular component: cell (GO:0005623);; cellular component: cell part (GO:0044464);; ce…	Circadian rhythm - plant (ko04712)
		Unigene_076157	PRR73	0.00934135	3.73967	up	0.0374174	3.28089	normal	Ras family;; Ras of Complex, Roc, domain of DAPkinase;; Response regulator receiver domain;; ADP-ribosylation factor family;; Glutathione S-transferase, N-terminal domain;; Glutathione S-transferase, N-terminal domain;; Glutaredoxin;; Glutathione S-transferase, N-terminal domain	Two-component response regulator-like PRR73 OS=Oryza sativa subsp. indica OX=39946 GN=PRR73 PE=2 SV=2	two-component response regulator-like PRR73 [Brachypodium distachyon]	biological process: cellular process (GO:0009987);; biological process: signaling (GO:0023052);; biological process: single-organism process (GO:0044699);; biological process: response to stimulus (GO:0050896);; biological process: biological regulation (GO:0065007);; molecular function: binding (GO:0005488);; molecular function: catalytic activity (GO:0003824);; cellular component: cell (GO:0005…	Circadian rhythm - plant (ko04712)
		Unigene_042662	PRR95	7.1074e-08	4.94683	up	0.00042407	3.2008	up	Response regulator receiver domain;; CCT motif	Two-component response regulator-like PRR95 OS=Oryza sativa subsp. japonica OX=39947 GN=PRR95 PE=2 SV=1	two-component response regulator-like PRR95 [Aegilops tauschii subsp. tauschii]	biological process: cellular process (GO:0009987);; biological process: signaling (GO:0023052);; biological process: single-organism process (GO:0044699);; biological process: response to stimulus (GO:0050896);; biological process: biological regulation (GO:0065007);; molecular function: binding (GO:0005488)	Circadian rhythm - plant (ko04712)
		Unigene_199339	PRR95	0.000589147	3.48831	up	0.0047225	2.21532	up	Response regulator receiver domain;; CCT motif	Two-component response regulator-like PRR95 OS=Oryza sativa subsp. japonica OX=39947 GN=PRR95 PE=2 SV=1	two-component response regulator [Avena sativa]	biological process: cellular process (GO:0009987);; biological process: signaling (GO:0023052);; biological process: single-organism process (GO:0044699);; biological process: response to stimulus (GO:0050896);; biological process: biological regulation (GO:0065007);; molecular function: binding (GO:0005488)	Circadian rhythm - plant (ko04712)
		Unigene_596795	PRR95	0.0059838	3.33669	up	0.010105	2.60274	normal	Response regulator receiver domain;; CCT motif	Two-component response regulator-like PRR95 OS=Oryza sativa subsp. japonica OX=39947 GN=PRR95 PE=2 SV=1	two-component response regulator-like PRR95 isoform X1 [Brachypodium distachyon]	biological process: cellular process (GO:0009987);; biological process: signaling (GO:0023052);; biological process: single-organism process (GO:0044699);; biological process: response to stimulus (GO:0050896);; biological process: biological regulation (GO:0065007);; molecular function: binding (GO:0005488)	Circadian rhythm - plant (ko04712)
	Protein LHY	Unigene_197017	LHY	3.46937e-05	6.27672	up	2.9521e-05	5.01269	up	Myb-like DNA-binding domain	Protein LHY OS=Arabidopsis thaliana OX=3702 GN=LHY PE=1 SV=2	LHY [Avena sativa]	biological process: reproduction (GO:0000003);; molecular function: binding (GO:0005488);; biological process: response to stimulus (GO:0050896);; biological process: reproductive process (GO:0022414);; biological process: developmental process (GO:0032502);; molecular function: nucleic acid binding transcription factor activity (GO:0001071);; biological process: biological regulation (GO:0065007…	Circadian rhythm - plant (ko04712)
	Transcription factor HY5	Unigene_054434	HY5	6.87227e-05	4.09319	up	0.0788259	1.74692	normal	bZIP transcription factor;; Basic region leucine zipper	Transcription factor HY5 OS=Solanum lycopersicum OX=4081 GN=HY5 PE=2 SV=1	predicted protein, partial [Hordeum vulgare subsp. vulgare]	molecular function: binding (GO:0005488);; biological process: response to stimulus (GO:0050896);; molecular function: nucleic acid binding transcription factor activity (GO:0001071);; biological process: biological regulation (GO:0065007);; cellular component: cell (GO:0005623);; cellular component: cell part (GO:0044464);; cellular component: organelle (GO:0043226);; biological process: cellula…	Circadian rhythm - plant (ko04712)
		Unigene_191636	HY5	0.000146856	3.97088	up	0.0205899	2.39274	normal	bZIP transcription factor;; Basic region leucine zipper	Transcription factor HY5 OS=Solanum lycopersicum OX=4081 GN=HY5 PE=2 SV=1	transcription factor HY5-like [Aegilops tauschii subsp. tauschii]	molecular function: binding (GO:0005488);; biological process: response to stimulus (GO:0050896);; molecular function: nucleic acid binding transcription factor activity (GO:0001071);; biological process: biological regulation (GO:0065007);; cellular component: cell (GO:0005623);; cellular component: cell part (GO:0044464);; cellular component: organelle (GO:0043226);; biological process: cellula…	Circadian rhythm - plant (ko04712)
	Protein GIGANTEA	Unigene_005233	GI	6.71894e-14	11.8118	up	5.87613e-09	10.1452	up	--	Protein GIGANTEA OS=Oryza sativa subsp. japonica OX=39947 GN=GI PE=2 SV=2	gigantea [Avena sativa]	biological process: reproduction (GO:0000003);; biological process: response to stimulus (GO:0050896);; biological process: reproductive process (GO:0022414);; biological process: developmental process (GO:0032502);; cellular component: cell (GO:0005623);; cellular component: cell part (GO:0044464);; cellular component: organelle (GO:0043226);; cellular component: membrane-enclosed lumen (GO:0031…	Circadian rhythm - plant (ko04712)
		Unigene_076126	GI	3.53285e-06	4.72929	up	0.000161888	3.95221	up	Response regulator receiver domain;; GAF domain	Protein GIGANTEA OS=Oryza sativa subsp. japonica OX=39947 GN=GI PE=2 SV=2	gigantea [Avena sativa]	biological process: reproduction (GO:0000003);; biological process: cellular process (GO:0009987);; biological process: signaling (GO:0023052);; biological process: single-organism process (GO:0044699);; biological process: response to stimulus (GO:0050896);; biological process: biological regulation (GO:0065007);; biological process: reproductive process (GO:0022414);; biological process: develo…	Circadian rhythm - plant (ko04712)
		Unigene_606126	GI	4.19173e-05	3.74055	up	4.62563e-07	3.43612	up	--	Protein GIGANTEA OS=Oryza sativa subsp. japonica OX=39947 GN=GI PE=2 SV=2	gigantea [Avena sativa]	biological process: reproduction (GO:0000003);; biological process: response to stimulus (GO:0050896);; biological process: reproductive process (GO:0022414);; biological process: developmental process (GO:0032502);; cellular component: cell (GO:0005623);; cellular component: cell part (GO:0044464);; cellular component: organelle (GO:0043226);; cellular component: membrane-enclosed lumen (GO:0031…	Circadian rhythm - plant (ko04712)
photosynthesis	Electron transport chain	Unigene_595026	FDC1	0.0028341	4.16541	up	0.00406447	4.47466	up	2Fe-2S iron-sulfur cluster binding domain;; Glyoxalase/Bleomycin resistance protein/Dioxygenase superfamily;; Glyoxalase-like domain;; Glyoxalase/Bleomycin resistance protein/Dioxygenase superfamily	Ferredoxin C 1, chloroplastic OS=Arabidopsis thaliana OX=3702 GN=FDC1 PE=1 SV=1	--	molecular function: catalytic activity (GO:0003824);; molecular function: binding (GO:0005488);; cellular component: cell (GO:0005623);; cellular component: cell part (GO:0044464);; biological process: metabolic process (GO:0008152);; biological process: cellular process (GO:0009987);; molecular function: electron carrier activity (GO:0009055);; biological process: response to stimulus (GO:005089…	Photosynthesis (ko00195)
		Unigene_070415	FDC1	1.64e-05	6.24049	up	0.0044816	4.87719	up	2Fe-2S iron-sulfur cluster binding domain;; Glyoxalase/Bleomycin resistance protein/Dioxygenase superfamily;; Glyoxalase-like domain;; Glyoxalase/Bleomycin resistance protein/Dioxygenase superfamily	Ferredoxin C 1, chloroplastic OS=Arabidopsis thaliana OX=3702 GN=FDC1 PE=1 SV=1	hypothetical protein CFC21_060113 [Triticum aestivum]	molecular function: catalytic activity (GO:0003824);; molecular function: binding (GO:0005488);; cellular component: cell (GO:0005623);; cellular component: cell part (GO:0044464);; biological process: metabolic process (GO:0008152);; biological process: cellular process (GO:0009987);; molecular function: electron carrier activity (GO:0009055);; biological process: response to stimulus (GO:005089…	Photosynthesis (ko00195)
		Unigene_177833	FDC2	--	--	--	9.48e-07	8.8218	up	2Fe-2S iron-sulfur cluster binding domain	Ferredoxin C 2, chloroplastic OS=Arabidopsis thaliana OX=3702 GN=FDC2 PE=2 SV=1	ferredoxin, chloroplastic [Brachypodium distachyon]	molecular function: electron carrier activity (GO:0009055);; molecular function: binding (GO:0005488)	Photosynthesis (ko00195)
		Unigene_183317	FDX3	0.00848964	-3.14684	down	0.425407	-1.48293	normal	2Fe-2S iron-sulfur cluster binding domain	Ferredoxin-3, chloroplastic OS=Zea mays OX=4577 GN=FDX3 PE=1 SV=1	ferredoxin-3, chloroplastic [Brachypodium distachyon]	molecular function: electron carrier activity (GO:0009055);; molecular function: binding (GO:0005488)	Photosynthesis (ko00195)
		Unigene_319102	Os03g0784700	--	--	--	0.000475104	4.41311	up	Oxidoreductase NAD-binding domain	Ferredoxin--NADP reductase, root isozyme, chloroplastic OS=Oryza sativa subsp. japonica OX=39947 GN=Os03g0784700 PE=1 SV=1	hypothetical protein CFC21_079849 [Triticum aestivum]	cellular component: cell (GO:0005623);; cellular component: cell part (GO:0044464);; cellular component: organelle (GO:0043226);; cellular component: organelle part (GO:0044422);; cellular component: membrane (GO:0016020);; molecular function: catalytic activity (GO:0003824);; biological process: metabolic process (GO:0008152);; biological process: single-organism process (GO:0044699);; cellular …	Photosynthesis (ko00195)
		Unigene_508133	OsI_21320	--	--	--	4.95982e-07	9.01516	up	--	Ferredoxin--NADP reductase, leaf isozyme 1, chloroplastic OS=Oryza sativa subsp. indica OX=39946 GN=OsI_21320 PE=3 SV=1	unnamed protein product [Triticum turgidum subsp. durum]	cellular component: cell (GO:0005623);; cellular component: cell part (GO:0044464);; cellular component: organelle (GO:0043226);; cellular component: organelle part (GO:0044422);; cellular component: membrane (GO:0016020);; cellular component: macromolecular complex (GO:0032991);; cellular component: membrane part (GO:0044425)	Photosynthesis (ko00195)
	Oxygen-evolving enhancer protein	Unigene_297824	OsI_025465	6.66e-08	8.25176	up	6.14e-07	7.05236	up	Oxygen evolving enhancer protein 3 (PsbQ)	Oxygen-evolving enhancer protein 3, chloroplastic OS=Oryza sativa subsp. indica OX=39946 GN=OsI_025465 PE=1 SV=2	putative oxygen-evolving complex precursor [Hordeum vulgare]	molecular function: binding (GO:0005488);; cellular component: extracellular region (GO:0005576);; cellular component: cell (GO:0005623);; cellular component: cell part (GO:0044464);; cellular component: organelle (GO:0043226);; cellular component: membrane (GO:0016020);; cellular component: macromolecular complex (GO:0032991);; cellular component: membrane part (GO:0044425);; cellular component:…	Photosynthesis (ko00195)
		Unigene_015938	OsI_025465	--	--	--	4.33e-09	10.5851	up	Oxygen evolving enhancer protein 3 (PsbQ)	Oxygen-evolving enhancer protein 3, chloroplastic OS=Oryza sativa subsp. indica OX=39946 GN=OsI_025465 PE=1 SV=2	putative oxygen-evolving complex precursor [Hordeum vulgare]	molecular function: binding (GO:0005488);; cellular component: extracellular region (GO:0005576);; cellular component: cell (GO:0005623);; cellular component: cell part (GO:0044464);; cellular component: organelle (GO:0043226);; cellular component: membrane (GO:0016020);; cellular component: macromolecular complex (GO:0032991);; cellular component: membrane part (GO:0044425);; cellular component:…	Photosynthesis (ko00195)
		Unigene_063203	PSBQ1	0.0211113	-2.94257	normal	0.00752229	-3.28046	down	Ribosomal L28 family;; Oxygen evolving enhancer protein 3 (PsbQ)	Oxygen-evolving enhancer protein 3-1, chloroplastic OS=Zea mays OX=4577 GN=PSBQ1 PE=2 SV=1	putative oxygen-evolving complex precursor [Hordeum vulgare]	molecular function: structural molecule activity (GO:0005198);; molecular function: binding (GO:0005488);; cellular component: extracellular region (GO:0005576);; cellular component: cell (GO:0005623);; cellular component: cell part (GO:0044464);; cellular component: organelle (GO:0043226);; cellular component: membrane (GO:0016020);; cellular component: macromolecular complex (GO:0032991);; cell…	Photosynthesis (ko00195)
		Unigene_068508	PSBP	4.63e-10	8.76345	up	1.15e-09	7.86059	up	PsbP	Oxygen-evolving enhancer protein 2, chloroplastic OS=Triticum aestivum OX=4565 GN=PSBP PE=2 SV=1	hypothetical protein CFC21_016893 [Triticum aestivum]	molecular function: binding (GO:0005488);; cellular component: cell (GO:0005623);; cellular component: cell part (GO:0044464);; cellular component: organelle (GO:0043226);; cellular component: membrane (GO:0016020);; cellular component: macromolecular complex (GO:0032991);; cellular component: membrane part (GO:0044425);; cellular component: organelle part (GO:0044422);; biological process: metab…	Photosynthesis (ko00195)

## Sheet: Leaves
Gene classification	Fuction categories	ID	Gene name	L0_vs_L3_DESeq2_FDR	L0_vs_L3_DESeq2_log2FC	L0_vs_L3_regulated	L0_vs_L2_DESeq2_FDR	L0_vs_L6_DESeq2_log2FC	L0_vs_L6_regulated	Pfam_annotation	Swissprot_annotation	nr_annotation	GO_second_level_annotation	KEGG_pathway_annotation
Circadian clocks	pseudo-response regulator(PRR)	Unigene_198044	PRR1	0.00265549	1.86399	up	0.00842126	1.64141	up	CCT motif;; Response regulator receiver domain	Two-component response regulator-like PRR1 OS=Oryza sativa subsp. japonica OX=39947 GN=PRR1 PE=1 SV=2	hypothetical protein CFC21_092848 [Triticum aestivum]	biological process: cellular process (GO:0009987);; biological process: signaling (GO:0023052);; biological process: single-organism process (GO:0044699);; biological process: response to stimulus (GO:0050896);; biological process: biological regulation (GO:0065007);; molecular function: binding (GO:0005488);; molecular function: nucleic acid binding transcription factor activity (GO:0001071);; c…	Circadian rhythm - plant (ko04712)
		Unigene_071040	PRR37	0.716958	0.361152	normal	0.00452643	1.29597	up	Response regulator receiver domain;; CCT motif	Two-component response regulator-like PRR37 OS=Oryza sativa subsp. indica OX=39946 GN=PRR37 PE=2 SV=2	unnamed protein product [Triticum turgidum subsp. durum]	biological process: cellular process (GO:0009987);; biological process: signaling (GO:0023052);; biological process: single-organism process (GO:0044699);; biological process: response to stimulus (GO:0050896);; biological process: biological regulation (GO:0065007);; molecular function: binding (GO:0005488);; cellular component: cell (GO:0005623);; cellular component: cell part (GO:0044464);; ce…	Circadian rhythm - plant (ko04712)
		Unigene_523659	PRR37	0.388947	-0.688464	normal	4.4658e-05	-2.14041	down	CCT motif;; Response regulator receiver domain	Two-component response regulator-like PRR37 OS=Oryza sativa subsp. indica OX=39946 GN=PRR37 PE=2 SV=2	pseudo-response regulator [Triticum monococcum subsp. aegilopoides]	biological process: cellular process (GO:0009987);; biological process: signaling (GO:0023052);; biological process: single-organism process (GO:0044699);; biological process: response to stimulus (GO:0050896);; biological process: biological regulation (GO:0065007);; molecular function: binding (GO:0005488);; cellular component: cell (GO:0005623);; cellular component: cell part (GO:0044464);; ce…	Circadian rhythm - plant (ko04712)
		Unigene_324807	PRR73	0.0850296	1.5178	normal	1.53121e-09	2.55933	up	CCT motif;; Response regulator receiver domain;; Elongation complex protein 6;; Elongator subunit Iki1;; Protein tyrosine and serine/threonine kinase;; Protein kinase domain	Two-component response regulator-like PRR73 OS=Oryza sativa subsp. indica OX=39946 GN=PRR73 PE=2 SV=2	two-component response regulator-like PRR73 [Brachypodium distachyon]	biological process: cellular process (GO:0009987);; biological process: signaling (GO:0023052);; biological process: single-organism process (GO:0044699);; biological process: response to stimulus (GO:0050896);; biological process: biological regulation (GO:0065007);; biological process: metabolic process (GO:0008152);; molecular function: binding (GO:0005488);; molecular function: catalytic acti…	Circadian rhythm - plant (ko04712)
		Unigene_593836	PRR73	0.00342203	2.26875	up	0.000173844	2.64256	up	Response regulator receiver domain	Two-component response regulator-like PRR73 OS=Oryza sativa subsp. indica OX=39946 GN=PRR73 PE=2 SV=2	hypothetical protein CFC21_062031 [Triticum aestivum]	biological process: cellular process (GO:0009987);; biological process: signaling (GO:0023052);; biological process: single-organism process (GO:0044699);; biological process: response to stimulus (GO:0050896);; biological process: biological regulation (GO:0065007);; molecular function: binding (GO:0005488);; cellular component: cell (GO:0005623);; cellular component: cell part (GO:0044464);; ce…	Circadian rhythm - plant (ko04712)
		Unigene_042662	PRR95	3.70139e-27	6.2637	up	5.59859e-40	6.45505	up	Response regulator receiver domain;; CCT motif	Two-component response regulator-like PRR95 OS=Oryza sativa subsp. japonica OX=39947 GN=PRR95 PE=2 SV=1	two-component response regulator-like PRR95 [Aegilops tauschii subsp. tauschii]	biological process: cellular process (GO:0009987);; biological process: signaling (GO:0023052);; biological process: single-organism process (GO:0044699);; biological process: response to stimulus (GO:0050896);; biological process: biological regulation (GO:0065007);; molecular function: binding (GO:0005488)	Circadian rhythm - plant (ko04712)
		Unigene_198683	PRR95	9.71659e-17	6.61177	up	1.33783e-22	7.67413	up	Response regulator receiver domain;; CCT motif	Two-component response regulator-like PRR95 OS=Oryza sativa subsp. japonica OX=39947 GN=PRR95 PE=2 SV=1	two-component response regulator-like PRR95 isoform X1 [Brachypodium distachyon]	biological process: cellular process (GO:0009987);; biological process: signaling (GO:0023052);; biological process: single-organism process (GO:0044699);; biological process: response to stimulus (GO:0050896);; biological process: biological regulation (GO:0065007);; molecular function: binding (GO:0005488)	Circadian rhythm - plant (ko04712)
		Unigene_199339	PRR95	1.29692e-09	3.57577	up	1.02409e-11	3.07228	up	Response regulator receiver domain;; CCT motif	Two-component response regulator-like PRR95 OS=Oryza sativa subsp. japonica OX=39947 GN=PRR95 PE=2 SV=1	two-component response regulator [Avena sativa]	biological process: cellular process (GO:0009987);; biological process: signaling (GO:0023052);; biological process: single-organism process (GO:0044699);; biological process: response to stimulus (GO:0050896);; biological process: biological regulation (GO:0065007);; molecular function: binding (GO:0005488)	Circadian rhythm - plant (ko04712)
		Unigene_322803	PRR95	3.20893e-28	6.52769	up	4.71302e-54	7.71952	up	Response regulator receiver domain;; CCT motif	Two-component response regulator-like PRR95 OS=Oryza sativa subsp. japonica OX=39947 GN=PRR95 PE=2 SV=1	--	biological process: cellular process (GO:0009987);; biological process: signaling (GO:0023052);; biological process: single-organism process (GO:0044699);; biological process: response to stimulus (GO:0050896);; biological process: biological regulation (GO:0065007);; molecular function: binding (GO:0005488)	Circadian rhythm - plant (ko04712)
		Unigene_596795	PRR95	7.0035e-12	5.13643	up	0.0637429	2.9603	normal	Response regulator receiver domain;; CCT motif	Two-component response regulator-like PRR95 OS=Oryza sativa subsp. japonica OX=39947 GN=PRR95 PE=2 SV=1	two-component response regulator-like PRR95 isoform X1 [Brachypodium distachyon]	biological process: cellular process (GO:0009987);; biological process: signaling (GO:0023052);; biological process: single-organism process (GO:0044699);; biological process: response to stimulus (GO:0050896);; biological process: biological regulation (GO:0065007);; molecular function: binding (GO:0005488)	Circadian rhythm - plant (ko04712)
		Unigene_073840	APRR5	5.91372e-10	3.65274	up	4.31839e-25	4.65381	up	Response regulator receiver domain;; CCT motif	Two-component response regulator-like APRR5 OS=Arabidopsis thaliana OX=3702 GN=APRR5 PE=1 SV=2	two-component response regulator [Avena sativa]	biological process: cellular process (GO:0009987);; biological process: signaling (GO:0023052);; biological process: single-organism process (GO:0044699);; biological process: response to stimulus (GO:0050896);; biological process: biological regulation (GO:0065007);; molecular function: binding (GO:0005488)	Circadian rhythm - plant (ko04712)
	Protein LHY	Unigene_075123	LHY	0.00876619	-1.73465	down	0.145617	-0.788636	normal	Myb-like DNA-binding domain	Protein LHY OS=Arabidopsis thaliana OX=3702 GN=LHY PE=1 SV=2	LHY [Avena sativa]	biological process: reproduction (GO:0000003);; molecular function: binding (GO:0005488);; biological process: response to stimulus (GO:0050896);; biological process: reproductive process (GO:0022414);; biological process: developmental process (GO:0032502);; molecular function: nucleic acid binding transcription factor activity (GO:0001071);; biological process: biological regulation (GO:0065007…	Circadian rhythm - plant (ko04712)
		Unigene_604770	LHY	0.882905	0.208436	normal	0.00657346	-2.79228	down	Myb-like DNA-binding domain	Protein LHY OS=Arabidopsis thaliana OX=3702 GN=LHY PE=1 SV=2	LHY [Avena sativa]	biological process: reproduction (GO:0000003);; molecular function: binding (GO:0005488);; biological process: response to stimulus (GO:0050896);; biological process: reproductive process (GO:0022414);; biological process: developmental process (GO:0032502);; molecular function: nucleic acid binding transcription factor activity (GO:0001071);; biological process: biological regulation (GO:0065007…	Circadian rhythm - plant (ko04712)
	Transcription factor HY5	Unigene_054434	HY5	0.000171171	3.1998	up	7.1487e-10	4.44386	up	bZIP transcription factor;; Basic region leucine zipper	Transcription factor HY5 OS=Solanum lycopersicum OX=4081 GN=HY5 PE=2 SV=1	predicted protein, partial [Hordeum vulgare subsp. vulgare]	molecular function: binding (GO:0005488);; biological process: response to stimulus (GO:0050896);; molecular function: nucleic acid binding transcription factor activity (GO:0001071);; biological process: biological regulation (GO:0065007);; cellular component: cell (GO:0005623);; cellular component: cell part (GO:0044464);; cellular component: organelle (GO:0043226);; biological process: cellula…	Circadian rhythm - plant (ko04712)
		Unigene_179347	HY5	--	--	--	1.89997e-09	7.81473	up	bZIP transcription factor;; Basic region leucine zipper	Transcription factor HY5 OS=Solanum lycopersicum OX=4081 GN=HY5 PE=2 SV=1	unnamed protein product [Triticum turgidum subsp. durum]	molecular function: binding (GO:0005488);; biological process: response to stimulus (GO:0050896);; molecular function: nucleic acid binding transcription factor activity (GO:0001071);; biological process: biological regulation (GO:0065007);; cellular component: cell (GO:0005623);; cellular component: cell part (GO:0044464);; cellular component: organelle (GO:0043226);; biological process: cellula…	Circadian rhythm - plant (ko04712)
		Unigene_191636	HY5	0.000691325	2.67397	up	2.17738e-07	3.27005	up	bZIP transcription factor;; Basic region leucine zipper	Transcription factor HY5 OS=Solanum lycopersicum OX=4081 GN=HY5 PE=2 SV=1	transcription factor HY5-like [Aegilops tauschii subsp. tauschii]	molecular function: binding (GO:0005488);; biological process: response to stimulus (GO:0050896);; molecular function: nucleic acid binding transcription factor activity (GO:0001071);; biological process: biological regulation (GO:0065007);; cellular component: cell (GO:0005623);; cellular component: cell part (GO:0044464);; cellular component: organelle (GO:0043226);; biological process: cellula…	Circadian rhythm - plant (ko04712)
		Unigene_314013	HY5	1.41302e-05	3.19487	up	1.40247e-15	4.96072	up	--	Transcription factor HY5 OS=Solanum lycopersicum OX=4081 GN=HY5 PE=2 SV=1	hypothetical protein GIB67_001124 [Kingdonia uniflora]	molecular function: binding (GO:0005488);; molecular function: nucleic acid binding transcription factor activity (GO:0001071);; biological process: biological regulation (GO:0065007);; cellular component: cell (GO:0005623);; cellular component: cell part (GO:0044464);; cellular component: organelle (GO:0043226)	Circadian rhythm - plant (ko04712)
		Unigene_511124	HY5	--	--	--	4.90481e-10	7.18841	up	bZIP transcription factor;; Basic region leucine zipper;; bZIP Maf transcription factor	Transcription factor HY5 OS=Arabidopsis thaliana OX=3702 GN=HY5 PE=1 SV=1	unnamed protein product [Triticum turgidum subsp. durum]	molecular function: binding (GO:0005488);; biological process: response to stimulus (GO:0050896);; molecular function: nucleic acid binding transcription factor activity (GO:0001071);; biological process: biological regulation (GO:0065007);; cellular component: cell (GO:0005623);; cellular component: cell part (GO:0044464);; cellular component: organelle (GO:0043226);; biological process: cellula…	Circadian rhythm - plant (ko04712)
		Unigene_599506	HY5	9.89162e-06	5.79778	up	--	--	--	bZIP transcription factor;; Basic region leucine zipper;; bZIP Maf transcription factor	Transcription factor HY5 OS=Arabidopsis thaliana OX=3702 GN=HY5 PE=1 SV=1	unnamed protein product [Triticum turgidum subsp. durum]	molecular function: binding (GO:0005488);; biological process: response to stimulus (GO:0050896);; molecular function: nucleic acid binding transcription factor activity (GO:0001071);; biological process: biological regulation (GO:0065007);; cellular component: cell (GO:0005623);; cellular component: cell part (GO:0044464);; cellular component: organelle (GO:0043226);; biological process: cellula…	Circadian rhythm - plant (ko04712)
	Protein GIGANTEA	Unigene_005233	GI	5.76335e-25	7.9156	up	4.98432e-18	8.86477	up	--	Protein GIGANTEA OS=Oryza sativa subsp. japonica OX=39947 GN=GI PE=2 SV=2	gigantea [Avena sativa]	biological process: reproduction (GO:0000003);; biological process: response to stimulus (GO:0050896);; biological process: reproductive process (GO:0022414);; biological process: developmental process (GO:0032502);; cellular component: cell (GO:0005623);; cellular component: cell part (GO:0044464);; cellular component: organelle (GO:0043226);; cellular component: membrane-enclosed lumen (GO:0031…	Circadian rhythm - plant (ko04712)
		Unigene_076126	GI	4.96006e-15	4.03144	up	4.76234e-37	4.98496	up	Response regulator receiver domain;; GAF domain	Protein GIGANTEA OS=Oryza sativa subsp. japonica OX=39947 GN=GI PE=2 SV=2	gigantea [Avena sativa]	biological process: reproduction (GO:0000003);; biological process: cellular process (GO:0009987);; biological process: signaling (GO:0023052);; biological process: single-organism process (GO:0044699);; biological process: response to stimulus (GO:0050896);; biological process: biological regulation (GO:0065007);; biological process: reproductive process (GO:0022414);; biological process: develo…	Circadian rhythm - plant (ko04712)
		Unigene_606126	GI	4.33154e-25	5.96643	up	3.32588e-23	6.59346	up	--	Protein GIGANTEA OS=Oryza sativa subsp. japonica OX=39947 GN=GI PE=2 SV=2	gigantea [Avena sativa]	biological process: reproduction (GO:0000003);; biological process: response to stimulus (GO:0050896);; biological process: reproductive process (GO:0022414);; biological process: developmental process (GO:0032502);; cellular component: cell (GO:0005623);; cellular component: cell part (GO:0044464);; cellular component: organelle (GO:0043226);; cellular component: membrane-enclosed lumen (GO:0031…	Circadian rhythm - plant (ko04712)
photosynthesis	Electron transport chain	Unigene_177833	FDC2	0.0038661	-2.31279	down	1.92569e-06	-3.28459	down	2Fe-2S iron-sulfur cluster binding domain	Ferredoxin C 2, chloroplastic OS=Arabidopsis thaliana OX=3702 GN=FDC2 PE=2 SV=1	ferredoxin, chloroplastic [Brachypodium distachyon]	molecular function: electron carrier activity (GO:0009055);; molecular function: binding (GO:0005488)	Photosynthesis (ko00195)
		Unigene_598875	FDC2	0.0021976	-2.84153	down	1.87418e-15	-7.97394	down	2Fe-2S iron-sulfur cluster binding domain	Ferredoxin C 2, chloroplastic OS=Arabidopsis thaliana OX=3702 GN=FDC2 PE=2 SV=1	ferredoxin, chloroplastic [Brachypodium distachyon]	molecular function: electron carrier activity (GO:0009055);; molecular function: binding (GO:0005488)	Photosynthesis (ko00195)
		Unigene_183317	FDX3	0.0024212	-2.82639	down	7.5962e-12	-6.23369	down	2Fe-2S iron-sulfur cluster binding domain	Ferredoxin-3, chloroplastic OS=Zea mays OX=4577 GN=FDX3 PE=1 SV=1	ferredoxin-3, chloroplastic [Brachypodium distachyon]	molecular function: electron carrier activity (GO:0009055);; molecular function: binding (GO:0005488)	Photosynthesis (ko00195)
		Unigene_314189	FDX6	5.52125e-05	4.14141	up	6.2621e-08	4.98543	up	2Fe-2S iron-sulfur cluster binding domain	Ferredoxin-6, chloroplastic OS=Zea mays OX=4577 GN=FDX6 PE=2 SV=1	ferredoxin-6, chloroplastic [Brachypodium distachyon]	molecular function: electron carrier activity (GO:0009055);; molecular function: binding (GO:0005488)	Photosynthesis (ko00195)
		Unigene_188442	Os07g0147900	1.4007e-07	-3.51108	down	3.18408e-05	-3.84081	down	Oxidoreductase NAD-binding domain	Ferredoxin--NADP reductase, embryo isozyme, chloroplastic OS=Oryza sativa subsp. japonica OX=39947 GN=Os07g0147900 PE=1 SV=1	hypothetical protein CFC21_016873 [Triticum aestivum]	molecular function: catalytic activity (GO:0003824);; biological process: metabolic process (GO:0008152);; biological process: single-organism process (GO:0044699)	Photosynthesis (ko00195)
		Unigene_188442	Os07g0147900	1.4e-07	-3.51108	down	3.18e-05	-3.84081	down	Oxidoreductase NAD-binding domain	Ferredoxin--NADP reductase, embryo isozyme, chloroplastic OS=Oryza sativa subsp. japonica OX=39947 GN=Os07g0147900 PE=1 SV=1	hypothetical protein CFC21_016873 [Triticum aestivum]	molecular function: catalytic activity (GO:0003824);; biological process: metabolic process (GO:0008152);; biological process: single-organism process (GO:0044699)	Photosynthesis (ko00195)
		Unigene_059321	OsI_21320	0.369053	1.00665	normal	0.0017812	-4.91871	down	--	Ferredoxin--NADP reductase, leaf isozyme 1, chloroplastic OS=Oryza sativa subsp. indica OX=39946 GN=OsI_21320 PE=3 SV=1	unnamed protein product [Triticum turgidum subsp. durum]	cellular component: cell (GO:0005623);; cellular component: cell part (GO:0044464);; cellular component: organelle (GO:0043226);; cellular component: organelle part (GO:0044422);; cellular component: membrane (GO:0016020);; cellular component: macromolecular complex (GO:0032991);; cellular component: membrane part (GO:0044425)	Photosynthesis (ko00195)
		Unigene_527440	OsI_21320	0.443274	-0.715863	normal	0.000954983	-3.19558	down	Oxidoreductase NAD-binding domain;; Oxidoreductase FAD-binding domain	Ferredoxin--NADP reductase, leaf isozyme 1, chloroplastic OS=Oryza sativa subsp. indica OX=39946 GN=OsI_21320 PE=3 SV=1	hypothetical protein CFC21_106482 [Triticum aestivum]	cellular component: cell (GO:0005623);; cellular component: cell part (GO:0044464);; cellular component: organelle (GO:0043226);; cellular component: organelle part (GO:0044422);; cellular component: membrane (GO:0016020);; molecular function: catalytic activity (GO:0003824);; biological process: metabolic process (GO:0008152);; biological process: single-organism process (GO:0044699);; cellular …	Photosynthesis (ko00195)
	Photosystem II	Unigene_068266	PSBS1	0.0253559	1.83358	normal	2.29486e-06	2.49147	up	--	Photosystem II 22 kDa protein 1, chloroplastic OS=Oryza sativa subsp. indica OX=39946 GN=PSBS1 PE=1 SV=1	photosystem II 22 kDa protein, chloroplastic [Aegilops tauschii subsp. tauschii]	cellular component: cell (GO:0005623);; cellular component: cell part (GO:0044464);; biological process: localization (GO:0051179);; cellular component: organelle (GO:0043226);; cellular component: organelle part (GO:0044422);; cellular component: membrane (GO:0016020)	Photosynthesis (ko00195)
		Unigene_599003	PSB27-1	0.00145823	-2.87002	down	6.13711e-18	-4.71585	down	Photosystem II Pbs27	Photosystem II repair protein PSB27-H1, chloroplastic OS=Arabidopsis thaliana OX=3702 GN=PSB27-1 PE=1 SV=1	photosystem II repair protein PSB27-H1, chloroplastic [Brachypodium distachyon]	biological process: metabolic process (GO:0008152);; biological process: cellular process (GO:0009987);; biological process: cellular component organization or biogenesis (GO:0071840)	Photosynthesis (ko00195)
		Unigene_184284	PSB28	0.00101172	2.15051	up	0.0044759	2.67945	up	Psb28 protein	Photosystem II reaction center PSB28 protein, chloroplastic OS=Oryza sativa subsp. japonica OX=39947 GN=PSB28 PE=2 SV=2	--	cellular component: cell (GO:0005623);; cellular component: membrane (GO:0016020);; cellular component: macromolecular complex (GO:0032991);; cellular component: membrane part (GO:0044425);; cellular component: cell part (GO:0044464);; biological process: metabolic process (GO:0008152);; biological process: cellular process (GO:0009987)	Photosynthesis (ko00195)
		Unigene_530130	PSB28	8.02086e-05	2.48179	up	2.36105e-13	4.06841	up	Psb28 protein	Photosystem II reaction center PSB28 protein, chloroplastic OS=Oryza sativa subsp. japonica OX=39947 GN=PSB28 PE=2 SV=2	hypothetical protein CFC21_036900 [Triticum aestivum]	cellular component: cell (GO:0005623);; cellular component: membrane (GO:0016020);; cellular component: macromolecular complex (GO:0032991);; cellular component: membrane part (GO:0044425);; cellular component: cell part (GO:0044464);; biological process: metabolic process (GO:0008152);; biological process: cellular process (GO:0009987)	Photosynthesis (ko00195)
		Unigene_597675	PSB28	2.78578e-05	2.96101	up	0.545777	0.56382	normal	Psb28 protein;; Multicopper oxidase	Photosystem II reaction center PSB28 protein, chloroplastic OS=Oryza sativa subsp. japonica OX=39947 GN=PSB28 PE=2 SV=2	hypothetical protein CFC21_036900 [Triticum aestivum]	cellular component: cell (GO:0005623);; cellular component: membrane (GO:0016020);; cellular component: macromolecular complex (GO:0032991);; cellular component: membrane part (GO:0044425);; cellular component: cell part (GO:0044464);; biological process: metabolic process (GO:0008152);; biological process: cellular process (GO:0009987)	Photosynthesis (ko00195)
		Unigene_076186	psbA	0.0174886	-1.73911	normal	0.00274183	-1.77613	down	--	Photosystem II protein D1 OS=Vicia faba OX=3906 GN=psbA PE=3 SV=2	uncharacterized protein LOC100844587 [Brachypodium distachyon]	--	Photosynthesis (ko00195)
		Unigene_199782	psbB	0.000135608	-2.42674	down	5.37041e-06	-2.62476	down	Photosystem II protein;; Bacterial RNA polymerase, alpha chain C terminal domain;; RNA polymerase Rpb3/RpoA insert domain;; RNA polymerase Rpb3/Rpb11 dimerisation domain;; WRKY DNA -binding domain;; Cytochrome b/b6/petB;; Cytochrome b(N-terminal)/b6/petB;; Clp protease;; Cytochrome b(C-terminal)/b6/petD;; Ribosomal protein S11;; Ribosomal protein S8;; Ribosomal protein L14p/L23e;; Ribosomal prote…	Photosystem II CP47 reaction center protein OS=Agrostis stolonifera OX=63632 GN=psbB PE=3 SV=1	photosystem II CP47 chlorophyll apoprotein [Poa palustris]	molecular function: binding (GO:0005488);; molecular function: nucleic acid binding transcription factor activity (GO:0001071);; biological process: biological regulation (GO:0065007);; molecular function: structural molecule activity (GO:0005198);; molecular function: catalytic activity (GO:0003824);; biological process: metabolic process (GO:0008152);; biological process: cellular process (GO:0…	Photosynthesis (ko00195)
		Unigene_070551	psbC	3.92924e-07	3.38243	up	4.20435e-07	3.18303	up	Photosystem II protein;; Photosynthetic reaction centre protein;; S4 domain;; Ribosomal protein S4/S9 N-terminal domain;; YCF9	Photosystem II CP43 reaction center protein OS=Agrostis stolonifera OX=63632 GN=psbC PE=3 SV=1	photosystem II CP43 chlorophyll apoprotein, partial [Triticum timopheevii]	molecular function: binding (GO:0005488);; cellular component: cell (GO:0005623);; cellular component: membrane (GO:0016020);; cellular component: macromolecular complex (GO:0032991);; cellular component: membrane part (GO:0044425);; cellular component: cell part (GO:0044464);; biological process: metabolic process (GO:0008152);; biological process: cellular process (GO:0009987);; biological proc…	Photosynthesis (ko00195)
		Unigene_528695	psbD	--	--	--	3.98458e-07	8.6835	up	Photosynthetic reaction centre protein	Photosystem II D2 protein OS=Agrostis stolonifera OX=63632 GN=psbD PE=3 SV=1	photosystem II protein D2 [Oryza sativa Indica Group]	cellular component: cell (GO:0005623);; cellular component: cell part (GO:0044464);; cellular component: organelle (GO:0043226);; cellular component: organelle part (GO:0044422);; cellular component: membrane (GO:0016020);; biological process: metabolic process (GO:0008152);; biological process: cellular process (GO:0009987);; biological process: single-organism process (GO:0044699);; molecular f…	Photosynthesis (ko00195)
		Unigene_075342	PSBR	0.000233183	-2.98066	down	0.0147783	-1.6572	normal	--	Photosystem II 10 kDa polypeptide, chloroplastic OS=Hordeum vulgare OX=4513 GN=PSBR PE=3 SV=1	hypothetical protein CFC21_023328 [Triticum aestivum]	--	Photosynthesis (ko00195)
		Unigene_512552	PSBR	6.17266e-33	-9.81601	down	4.48069e-19	-11.8603	down	Photosystem II 10 kDa polypeptide PsbR	Photosystem II 10 kDa polypeptide, chloroplastic OS=Hordeum vulgare OX=4513 GN=PSBR PE=3 SV=1	photosystem II 10 kDa polypeptide, chloroplastic-like [Aegilops tauschii subsp. tauschii]	cellular component: cell (GO:0005623);; cellular component: membrane (GO:0016020);; cellular component: macromolecular complex (GO:0032991);; cellular component: membrane part (GO:0044425);; cellular component: cell part (GO:0044464);; biological process: metabolic process (GO:0008152);; biological process: cellular process (GO:0009987)	Photosynthesis (ko00195)
		Unigene_196330	PSBS1	0.00525681	2.58678	up	1.40292e-07	3.87561	up	--	Photosystem II 22 kDa protein 1, chloroplastic OS=Oryza sativa subsp. indica OX=39946 GN=PSBS1 PE=1 SV=1	photosystem II 22 kDa protein, chloroplastic [Aegilops tauschii subsp. tauschii]	cellular component: cell (GO:0005623);; cellular component: cell part (GO:0044464);; biological process: localization (GO:0051179);; cellular component: organelle (GO:0043226);; cellular component: organelle part (GO:0044422);; cellular component: membrane (GO:0016020)	Photosynthesis (ko00195)
		Unigene_597086	PSBS1	0.0154757	1.92704	normal	3.83609e-08	2.42819	up	Chlorophyll A-B binding protein	Photosystem II 22 kDa protein 1, chloroplastic OS=Oryza sativa subsp. indica OX=39946 GN=PSBS1 PE=1 SV=1	photosystem II 22 kDa protein, chloroplastic [Aegilops tauschii subsp. tauschii]	cellular component: cell (GO:0005623);; cellular component: cell part (GO:0044464);; biological process: localization (GO:0051179);; cellular component: organelle (GO:0043226);; cellular component: organelle part (GO:0044422);; cellular component: membrane (GO:0016020)	Photosynthesis (ko00195)
		Unigene_165777	PSBW	0.00838602	1.95122	up	4.54167e-06	2.9571	up	Photosystem II reaction centre W protein (PsbW)	Photosystem II reaction center W protein, chloroplastic OS=Oryza sativa subsp. japonica OX=39947 GN=PSBW PE=2 SV=1	unnamed protein product [Triticum turgidum subsp. durum]	cellular component: cell (GO:0005623);; cellular component: organelle (GO:0043226);; cellular component: cell part (GO:0044464);; cellular component: membrane (GO:0016020);; cellular component: macromolecular complex (GO:0032991);; cellular component: membrane part (GO:0044425);; biological process: metabolic process (GO:0008152);; biological process: cellular process (GO:0009987)	Photosynthesis (ko00195)
		Unigene_589988	PSBW	0.59328	0.560533	normal	0.000210849	2.51148	up	Photosystem II reaction centre W protein (PsbW)	Photosystem II reaction center W protein, chloroplastic OS=Oryza sativa subsp. japonica OX=39947 GN=PSBW PE=2 SV=1	unnamed protein product [Triticum turgidum subsp. durum]	cellular component: cell (GO:0005623);; cellular component: organelle (GO:0043226);; cellular component: cell part (GO:0044464);; cellular component: membrane (GO:0016020);; cellular component: macromolecular complex (GO:0032991);; cellular component: membrane part (GO:0044425);; biological process: metabolic process (GO:0008152);; biological process: cellular process (GO:0009987)	Photosynthesis (ko00195)
		Unigene_185251	PSBY	0.00596478	-1.86574	down	2.85834e-13	-3.63767	down	Photosystem II protein Y (PsbY)	Photosystem II core complex proteins psbY, chloroplastic OS=Spinacia oleracea OX=3562 GN=PSBY PE=1 SV=2	--	cellular component: cell (GO:0005623);; cellular component: membrane (GO:0016020);; cellular component: macromolecular complex (GO:0032991);; cellular component: membrane part (GO:0044425);; cellular component: cell part (GO:0044464);; biological process: metabolic process (GO:0008152);; biological process: cellular process (GO:0009987);; molecular function: binding (GO:0005488)	Photosynthesis (ko00195)
	photosystem I	Unigene_174094	psaA	0.000166727	-2.37994	down	1.36165e-09	-2.68272	down	Photosystem I psaA/psaB protein;; Tetratricopeptide repeat;; Tetratricopeptide repeat;; Tetratricopeptide repeat;; Tetratricopeptide repeat;; TPR repeat;; Tetratricopeptide repeat	Photosystem I P700 chlorophyll a apoprotein A1 OS=Triticum aestivum OX=4565 GN=psaA PE=3 SV=1	photosystem I P700 apoprotein A1 [Elymus nutans]	molecular function: binding (GO:0005488);; cellular component: cell (GO:0005623);; cellular component: membrane (GO:0016020);; cellular component: macromolecular complex (GO:0032991);; cellular component: membrane part (GO:0044425);; cellular component: cell part (GO:0044464);; biological process: metabolic process (GO:0008152);; biological process: cellular process (GO:0009987)	Photosynthesis (ko00195)
		Unigene_529787	psaA	1.77345e-06	-2.83446	down	6.31785e-12	-4.08278	down	Photosystem I psaA/psaB protein;; Photosystem I psaA/psaB protein;; Ribosomal protein S14p/S29e	Photosystem I P700 chlorophyll a apoprotein A1 OS=Triticum aestivum OX=4565 GN=psaA PE=3 SV=1	'photosystem I P700 apoprotein A1 [Vicia sativa]	molecular function: structural molecule activity (GO:0005198);; cellular component: cell (GO:0005623);; cellular component: macromolecular complex (GO:0032991);; cellular component: organelle (GO:0043226);; cellular component: cell part (GO:0044464);; biological process: metabolic process (GO:0008152);; biological process: cellular process (GO:0009987);; cellular component: membrane (GO:0016020);…	Photosynthesis (ko00195)
		Unigene_323212	psaB	3.7564e-09	-4.36189	down	7.44599e-08	-4.12743	down	Photosystem I psaA/psaB protein;; Photosystem I psaA/psaB protein	Photosystem I P700 chlorophyll a apoprotein A2 OS=Agrostis stolonifera OX=63632 GN=psaB PE=3 SV=1	photosystem I P700 chlorophyll a apoprotein A2 [Avenella flexuosa]	molecular function: binding (GO:0005488);; cellular component: cell (GO:0005623);; cellular component: cell part (GO:0044464);; cellular component: organelle (GO:0043226);; cellular component: membrane (GO:0016020);; cellular component: macromolecular complex (GO:0032991);; cellular component: membrane part (GO:0044425);; cellular component: organelle part (GO:0044422);; biological process: metab…	Photosynthesis (ko00195)
		Unigene_515822	psaD	0.0246135	-1.80834	normal	2.50986e-10	-4.97879	down	PsaD	Photosystem I reaction center subunit II, chloroplastic OS=Hordeum vulgare OX=4513 GN=psaD PE=1 SV=1	hypothetical protein CFC21_068363 [Triticum aestivum]	cellular component: cell (GO:0005623);; cellular component: cell part (GO:0044464);; cellular component: organelle (GO:0043226);; cellular component: membrane (GO:0016020);; cellular component: macromolecular complex (GO:0032991);; cellular component: membrane part (GO:0044425);; cellular component: organelle part (GO:0044422);; biological process: metabolic process (GO:0008152);; biological proc…	Photosynthesis (ko00195)
		Unigene_505778	PSAE	9.51565e-16	-4.09814	down	6.40191e-14	-5.46986	down	Photosystem I reaction centre subunit IV / PsaE	Photosystem I reaction center subunit IV, chloroplastic OS=Hordeum vulgare OX=4513 GN=PSAE PE=1 SV=2	photosystem I reaction center subunit IV, chloroplastic [Brachypodium distachyon]	cellular component: cell (GO:0005623);; cellular component: membrane (GO:0016020);; cellular component: macromolecular complex (GO:0032991);; cellular component: membrane part (GO:0044425);; cellular component: cell part (GO:0044464);; biological process: metabolic process (GO:0008152);; biological process: cellular process (GO:0009987)	Photosynthesis (ko00195)
		Unigene_445873	PSAF	0.011665	-2.20806	normal	1.98417e-07	-2.98978	down	Photosystem I reaction centre subunit III	Photosystem I reaction center subunit III, chloroplastic OS=Hordeum vulgare OX=4513 GN=PSAF PE=1 SV=2	photosystem I reaction center subunit III, chloroplastic [Brachypodium distachyon]	cellular component: cell (GO:0005623);; cellular component: cell part (GO:0044464);; cellular component: organelle (GO:0043226);; cellular component: membrane (GO:0016020);; cellular component: macromolecular complex (GO:0032991);; cellular component: membrane part (GO:0044425);; cellular component: organelle part (GO:0044422);; biological process: metabolic process (GO:0008152);; biological proc…	Photosynthesis (ko00195)
		Unigene_172477	PSAG	0.0116829	-2.49293	normal	2.82372e-12	-3.91352	down	Photosystem I psaG / psaK	Photosystem I reaction center subunit V, chloroplastic OS=Hordeum vulgare OX=4513 GN=PSAG PE=1 SV=1	photosystem 1 subunit 5 [Brachypodium sylvaticum]	cellular component: cell (GO:0005623);; cellular component: cell part (GO:0044464);; biological process: metabolic process (GO:0008152);; biological process: cellular process (GO:0009987);; biological process: single-organism process (GO:0044699);; cellular component: organelle (GO:0043226);; cellular component: membrane (GO:0016020);; cellular component: macromolecular complex (GO:0032991);; cel…	Photosynthesis (ko00195)
		Unigene_509632	PSAG	0.000157087	-3.35196	down	9.85424e-13	-8.47275	down	Photosystem I psaG / psaK	Photosystem I reaction center subunit V, chloroplastic OS=Hordeum vulgare OX=4513 GN=PSAG PE=1 SV=1	RecName: Full=Photosystem I reaction center subunit V, chloroplastic; AltName: Full=PSI-G; AltName: Full=Photosystem I 9 kDa protein; Flags: Precursor [Hordeum vulgare]	cellular component: cell (GO:0005623);; cellular component: cell part (GO:0044464);; biological process: metabolic process (GO:0008152);; biological process: cellular process (GO:0009987);; biological process: single-organism process (GO:0044699);; cellular component: organelle (GO:0043226);; cellular component: membrane (GO:0016020);; cellular component: macromolecular complex (GO:0032991);; cel…	Photosynthesis (ko00195)
		Unigene_515137	PSAH	0.00225931	-2.97401	down	7.05147e-07	-6.45001	down	Photosystem I reaction centre subunit VI	Photosystem I reaction center subunit VI, chloroplastic OS=Hordeum vulgare OX=4513 GN=PSAH PE=1 SV=1	RecName: Full=Photosystem I reaction center subunit VI, chloroplastic; Short=PSI-H; AltName: Full=Light-harvesting complex I 11 kDa protein; Flags: Precursor [Hordeum vulgare]	cellular component: cell (GO:0005623);; cellular component: cell part (GO:0044464);; cellular component: organelle (GO:0043226);; cellular component: membrane (GO:0016020);; cellular component: macromolecular complex (GO:0032991);; cellular component: membrane part (GO:0044425);; cellular component: organelle part (GO:0044422);; biological process: metabolic process (GO:0008152);; biological proc…	Photosynthesis (ko00195)
		Unigene_507926	PSAK	8.04159e-07	-3.33488	down	2.15893e-12	-5.64923	down	Photosystem I psaG / psaK	Photosystem I reaction center subunit psaK, chloroplastic OS=Hordeum vulgare OX=4513 GN=PSAK PE=1 SV=1	Photosystem I reaction center subunit psaK, chloroplastic [Triticum urartu]	cellular component: cell (GO:0005623);; cellular component: membrane (GO:0016020);; cellular component: macromolecular complex (GO:0032991);; cellular component: membrane part (GO:0044425);; cellular component: cell part (GO:0044464);; biological process: metabolic process (GO:0008152);; biological process: cellular process (GO:0009987)	Photosynthesis (ko00195)
		Unigene_601215	PSAL	0.0260603	-1.95768	normal	5.69463e-12	-2.96438	down	Photosystem I reaction centre subunit XI	Photosystem I reaction center subunit XI, chloroplastic OS=Hordeum vulgare OX=4513 GN=PSAL PE=1 SV=1	hypothetical protein CFC21_033754 [Triticum aestivum]	cellular component: cell (GO:0005623);; cellular component: membrane (GO:0016020);; cellular component: macromolecular complex (GO:0032991);; cellular component: membrane part (GO:0044425);; cellular component: cell part (GO:0044464);; biological process: metabolic process (GO:0008152);; biological process: cellular process (GO:0009987)	Photosynthesis (ko00195)
		Unigene_180154	PSAN	4.30536e-06	-3.75708	down	7.83653e-10	-8.07597	down	Photosystem I reaction centre subunit N (PSAN or PSI-N)	Photosystem I reaction center subunit N, chloroplastic OS=Hordeum vulgare OX=4513 GN=PSAN PE=2 SV=1	unnamed protein product [Triticum turgidum subsp. durum]	cellular component: cell (GO:0005623);; cellular component: membrane (GO:0016020);; cellular component: macromolecular complex (GO:0032991);; cellular component: membrane part (GO:0044425);; cellular component: cell part (GO:0044464);; biological process: metabolic process (GO:0008152);; biological process: cellular process (GO:0009987)	Photosynthesis (ko00195)
		Unigene_597197	PSAN	0.00435056	-3.00084	down	6.01135e-16	-5.45112	down	Photosystem I reaction centre subunit N (PSAN or PSI-N)	Photosystem I reaction center subunit N, chloroplastic OS=Hordeum vulgare OX=4513 GN=PSAN PE=2 SV=1	unnamed protein product [Triticum turgidum subsp. durum]	cellular component: cell (GO:0005623);; cellular component: membrane (GO:0016020);; cellular component: macromolecular complex (GO:0032991);; cellular component: membrane part (GO:0044425);; cellular component: cell part (GO:0044464);; biological process: metabolic process (GO:0008152);; biological process: cellular process (GO:0009987)	Photosynthesis (ko00195)
		Unigene_003531	PSAN	5.14792e-05	-2.46024	down	6.22321e-17	-5.23864	down	Photosystem I reaction centre subunit N (PSAN or PSI-N)	Photosystem I reaction center subunit N, chloroplastic OS=Hordeum vulgare OX=4513 GN=PSAN PE=2 SV=1	unnamed protein product [Triticum turgidum subsp. durum]	cellular component: cell (GO:0005623);; cellular component: membrane (GO:0016020);; cellular component: macromolecular complex (GO:0032991);; cellular component: membrane part (GO:0044425);; cellular component: cell part (GO:0044464);; biological process: metabolic process (GO:0008152);; biological process: cellular process (GO:0009987)	Photosynthesis (ko00195)
		Unigene_187769	PSAO	0.0193045	-2.7613	normal	5.45379e-09	-6.47543	down	Cytochrome P450	Photosystem I subunit O OS=Arabidopsis thaliana OX=3702 GN=PSAO PE=1 SV=1	salt stress-responsive protein [Triticum aestivum]	molecular function: binding (GO:0005488);; molecular function: catalytic activity (GO:0003824);; biological process: metabolic process (GO:0008152);; biological process: single-organism process (GO:0044699)	Photosynthesis (ko00195)
		Unigene_596590	PSAO	0.000272442	-3.60816	down	3.76252e-11	-7.36159	down	--	Photosystem I subunit O OS=Arabidopsis thaliana OX=3702 GN=PSAO PE=1 SV=1	photosystem I subunit O [Aegilops tauschii subsp. tauschii]	--	Photosynthesis (ko00195)
	Oxidative phosphorylation	Unigene_526540	atpI	0.0242194	-2.2244	normal	1.10164e-07	-7.10118	down	ATP synthase A chain;; ATP synthase subunit C	ATP synthase subunit a, chloroplastic OS=Agrostis stolonifera OX=63632 GN=atpI PE=3 SV=1	ATP synthase CF0 subunit IV [Cynosurus cristatus]	molecular function: catalytic activity (GO:0003824);; molecular function: transporter activity (GO:0005215);; biological process: localization (GO:0051179);; cellular component: cell (GO:0005623);; cellular component: cell part (GO:0044464);; cellular component: organelle (GO:0043226);; cellular component: organelle part (GO:0044422);; cellular component: membrane (GO:0016020);; cellular componen…	Oxidative phosphorylation (ko00190);; Photosynthesis (ko00195)
		Unigene_603622	atpA	0.00154264	3.07387	up	--	--	--	--	ATP synthase subunit alpha, chloroplastic OS=Zea mays OX=4577 GN=atpA PE=1 SV=1	ATP synthase CF1 alpha subunit [Festuca pratensis]	molecular function: binding (GO:0005488);; cellular component: cell (GO:0005623);; cellular component: cell part (GO:0044464);; cellular component: organelle (GO:0043226);; biological process: response to stimulus (GO:0050896);; cellular component: organelle part (GO:0044422);; cellular component: membrane (GO:0016020);; biological process: multi-organism process (GO:0051704)	Oxidative phosphorylation (ko00190);; Photosynthesis (ko00195)
	Oxygen-evolving enhancer protein	Unigene_297824	OsI_025465	0.0361277	-2.36568	normal	1.22152e-10	-4.73797	down	Oxygen evolving enhancer protein 3 (PsbQ)	Oxygen-evolving enhancer protein 3, chloroplastic OS=Oryza sativa subsp. indica OX=39946 GN=OsI_025465 PE=1 SV=2	putative oxygen-evolving complex precursor [Hordeum vulgare]	molecular function: binding (GO:0005488);; cellular component: extracellular region (GO:0005576);; cellular component: cell (GO:0005623);; cellular component: cell part (GO:0044464);; cellular component: organelle (GO:0043226);; cellular component: membrane (GO:0016020);; cellular component: macromolecular complex (GO:0032991);; cellular component: membrane part (GO:0044425);; cellular component:…	Photosynthesis (ko00195)
		Unigene_015938	OsI_025465	1.90107e-08	-5.15255	down	2.7423e-16	-7.07399	down	Oxygen evolving enhancer protein 3 (PsbQ)	Oxygen-evolving enhancer protein 3, chloroplastic OS=Oryza sativa subsp. indica OX=39946 GN=OsI_025465 PE=1 SV=2	putative oxygen-evolving complex precursor [Hordeum vulgare]	molecular function: binding (GO:0005488);; cellular component: extracellular region (GO:0005576);; cellular component: cell (GO:0005623);; cellular component: cell part (GO:0044464);; cellular component: organelle (GO:0043226);; cellular component: membrane (GO:0016020);; cellular component: macromolecular complex (GO:0032991);; cellular component: membrane part (GO:0044425);; cellular component:…	Photosynthesis (ko00195)
		Unigene_063203	PSBQ1	4.80913e-09	-4.37591	down	1.42798e-13	-8.00653	down	Ribosomal L28 family;; Oxygen evolving enhancer protein 3 (PsbQ)	Oxygen-evolving enhancer protein 3-1, chloroplastic OS=Zea mays OX=4577 GN=PSBQ1 PE=2 SV=1	putative oxygen-evolving complex precursor [Hordeum vulgare]	molecular function: structural molecule activity (GO:0005198);; molecular function: binding (GO:0005488);; cellular component: extracellular region (GO:0005576);; cellular component: cell (GO:0005623);; cellular component: cell part (GO:0044464);; cellular component: organelle (GO:0043226);; cellular component: membrane (GO:0016020);; cellular component: macromolecular complex (GO:0032991);; cell…	Photosynthesis (ko00195)
		Unigene_601433	PSBO	0.0293368	-1.98714	normal	4.8456e-18	-4.0612	down	Manganese-stabilising protein / photosystem II polypeptide	Oxygen-evolving enhancer protein 1, chloroplastic OS=Triticum aestivum OX=4565 GN=PSBO PE=2 SV=1	oxygen-evolving enhancer protein 1, chloroplastic [Aegilops tauschii subsp. tauschii]	cellular component: cell (GO:0005623);; cellular component: cell part (GO:0044464);; cellular component: organelle (GO:0043226);; cellular component: organelle part (GO:0044422);; cellular component: membrane (GO:0016020);; cellular component: macromolecular complex (GO:0032991);; cellular component: membrane part (GO:0044425);; biological process: metabolic process (GO:0008152);; biological proc…	Photosynthesis (ko00195)
	Photosynthesis - antenna proteins	Unigene_602917	CAB1	7.12639e-08	-3.92081	down	0.42776	-1.03251	normal	Chlorophyll A-B binding protein	Chlorophyll a-b binding protein 1, chloroplastic OS=Zea mays OX=4577 GN=CAB1 PE=1 SV=1	unnamed protein product [Triticum turgidum subsp. durum]	--	Photosynthesis - antenna proteins (ko00196)
		Unigene_024324	CAB1B	0.00974403	-2.19719	down	0.55902	0.769399	normal	Chlorophyll A-B binding protein	Chlorophyll a-b binding protein 1B, chloroplastic OS=Solanum lycopersicum OX=4081 GN=CAB1B PE=3 SV=1	Chlorophyll a-b binding protein 3C, chloroplastic [Capsicum chinense]	molecular function: binding (GO:0005488);; cellular component: cell (GO:0005623);; cellular component: cell part (GO:0044464);; biological process: metabolic process (GO:0008152);; biological process: cellular process (GO:0009987);; biological process: response to stimulus (GO:0050896);; cellular component: organelle (GO:0043226);; cellular component: organelle part (GO:0044422);; cellular compon…	Photosynthesis - antenna proteins (ko00196)
		Unigene_584854	CAB2R	0.0047602	-1.86544	down	0.307535	-1.11985	normal	--	Chlorophyll a-b binding protein 2, chloroplastic OS=Oryza sativa subsp. japonica OX=39947 GN=CAB2R PE=2 SV=2	hypothetical protein D2E34_23845, partial [Mycobacteroides abscessus]	--	Photosynthesis - antenna proteins (ko00196)
		Unigene_167424	CAB3C	4.18233e-10	-9.41528	down	0.00643052	-3.20275	down	Chlorophyll A-B binding protein	Chlorophyll a-b binding protein 3C, chloroplastic OS=Solanum lycopersicum OX=4081 GN=CAB3C PE=3 SV=1	chloroplast chlorophyll a-b binding protein 3C, partial [Withania somnifera]	cellular component: cell (GO:0005623);; cellular component: cell part (GO:0044464);; cellular component: organelle (GO:0043226);; cellular component: organelle part (GO:0044422);; cellular component: membrane (GO:0016020)	Photosynthesis - antenna proteins (ko00196)
		Unigene_034358	CAB7	5.63174e-10	-4.34315	down	0.0447605	-2.05123	normal	Chlorophyll A-B binding protein	Chlorophyll a-b binding protein 7, chloroplastic OS=Solanum lycopersicum OX=4081 GN=CAB7 PE=3 SV=1	type II LHCI [Lolium temulentum]	--	Photosynthesis - antenna proteins (ko00196)
		Unigene_602536	CAB8	1.20544e-08	-4.14115	down	0.0100141	-1.86212	normal	Chlorophyll A-B binding protein	Chlorophyll a-b binding protein 8, chloroplastic OS=Solanum lycopersicum OX=4081 GN=CAB8 PE=3 SV=1	hypothetical protein CFC21_093147 [Triticum aestivum]	--	Photosynthesis - antenna proteins (ko00196)
		Unigene_187551	CAB8	5.01358e-05	-1.74377	down	0.358983	-0.949959	normal	Chlorophyll A-B binding protein	Chlorophyll a-b binding protein 8, chloroplastic OS=Solanum lycopersicum OX=4081 GN=CAB8 PE=3 SV=1	hypothetical protein CFC21_093147 [Triticum aestivum]	--	Photosynthesis - antenna proteins (ko00196)
		Unigene_181630	CAP10B	0.000167217	-4.20843	down	0.366688	-1.32156	normal	Chlorophyll A-B binding protein	Chlorophyll a-b binding protein CP24 10B, chloroplastic OS=Solanum lycopersicum OX=4081 GN=CAP10B PE=3 SV=1	hypothetical protein [Mycobacteroides abscessus]	--	Photosynthesis - antenna proteins (ko00196)
		Unigene_517055	CAP10B	4.31966e-17	-9.82816	down	5.04662e-12	-5.82099	down	Chlorophyll A-B binding protein	Chlorophyll a-b binding protein CP24 10B, chloroplastic OS=Solanum lycopersicum OX=4081 GN=CAP10B PE=3 SV=1	chlorophyll a-b binding protein CP24 10B, chloroplastic [Aegilops tauschii subsp. tauschii]	--	Photosynthesis - antenna proteins (ko00196)
		Unigene_067495	LHBC	9.25065e-17	-4.50563	down	0.00515552	-2.78211	down	Chlorophyll A-B binding protein	Chlorophyll a-b binding protein of LHCII type III, chloroplastic OS=Hordeum vulgare OX=4513 GN=LHBC PE=2 SV=1	hypothetical protein D2E34_23755, partial [Mycobacteroides abscessus]	biological process: response to stimulus (GO:0050896);; molecular function: structural molecule activity (GO:0005198);; molecular function: binding (GO:0005488);; cellular component: cell (GO:0005623);; cellular component: cell part (GO:0044464);; biological process: metabolic process (GO:0008152);; biological process: cellular process (GO:0009987);; cellular component: organelle (GO:0043226);; c…	Photosynthesis - antenna proteins (ko00196)
		Unigene_185210	LHBC	3.49355e-12	-3.82064	down	0.196874	-1.59716	normal	Chlorophyll A-B binding protein	Chlorophyll a-b binding protein of LHCII type III, chloroplastic OS=Hordeum vulgare OX=4513 GN=LHBC PE=2 SV=1	--	biological process: response to stimulus (GO:0050896);; molecular function: structural molecule activity (GO:0005198);; molecular function: binding (GO:0005488);; cellular component: cell (GO:0005623);; cellular component: cell part (GO:0044464);; biological process: metabolic process (GO:0008152);; biological process: cellular process (GO:0009987);; cellular component: organelle (GO:0043226);; c…	Photosynthesis - antenna proteins (ko00196)
		Unigene_024326	LHBC	1.46277e-11	-7.54816	down	0.00199025	-2.89815	down	Chlorophyll A-B binding protein	Chlorophyll a-b binding protein of LHCII type III, chloroplastic OS=Hordeum vulgare OX=4513 GN=LHBC PE=2 SV=1	hypothetical protein D2E34_23755, partial [Mycobacteroides abscessus]	biological process: response to stimulus (GO:0050896);; molecular function: structural molecule activity (GO:0005198);; molecular function: binding (GO:0005488);; cellular component: cell (GO:0005623);; cellular component: cell part (GO:0044464);; biological process: metabolic process (GO:0008152);; biological process: cellular process (GO:0009987);; cellular component: organelle (GO:0043226);; c…	Photosynthesis - antenna proteins (ko00196)
		Unigene_066527	LHC	0.00248004	-2.20155	down	0.491633	-0.913486	normal	Chlorophyll A-B binding protein	Chlorophyll a-b binding protein 1B-21, chloroplastic OS=Hordeum vulgare OX=4513 GN=LHC Ib-21 PE=1 SV=1	chlorophyll a-b binding protein 1B-21, chloroplastic, partial [Avena sativa]	molecular function: binding (GO:0005488);; cellular component: cell (GO:0005623);; cellular component: cell part (GO:0044464);; biological process: metabolic process (GO:0008152);; biological process: cellular process (GO:0009987);; biological process: response to stimulus (GO:0050896);; cellular component: organelle (GO:0043226);; cellular component: organelle part (GO:0044422);; cellular compon…	Photosynthesis - antenna proteins (ko00196)
		Unigene_523815	LHC Ib-21	1.12742e-14	-9.14119	down	0.000112727	-4.04903	down	Chlorophyll A-B binding protein	Chlorophyll a-b binding protein 1B-21, chloroplastic OS=Hordeum vulgare OX=4513 GN=LHC Ib-21 PE=1 SV=1	chlorophyll a-b binding protein 1B-21, chloroplastic, partial [Avena sativa]	molecular function: binding (GO:0005488);; cellular component: cell (GO:0005623);; cellular component: cell part (GO:0044464);; biological process: metabolic process (GO:0008152);; biological process: cellular process (GO:0009987);; biological process: response to stimulus (GO:0050896);; cellular component: organelle (GO:0043226);; cellular component: organelle part (GO:0044422);; cellular compon…	Photosynthesis - antenna proteins (ko00196)
		Unigene_019041	LHCA4	2.10753e-28	-6.31226	down	2.55742e-09	-4.90931	down	Chlorophyll A-B binding protein	Chlorophyll a-b binding protein 4, chloroplastic OS=Arabidopsis thaliana OX=3702 GN=LHCA4 PE=1 SV=1	chlorophyll a-b binding protein 4, chloroplastic [Brachypodium distachyon]	--	Photosynthesis - antenna proteins (ko00196)
		Unigene_183029	LHCA4	3.75813e-08	-4.19161	down	0.0931435	-1.95462	normal	Chlorophyll A-B binding protein	Chlorophyll a-b binding protein 4, chloroplastic OS=Arabidopsis thaliana OX=3702 GN=LHCA4 PE=1 SV=1	chlorophyll a-b binding protein 1B-20, chloroplastic [Brachypodium distachyon]	--	Photosynthesis - antenna proteins (ko00196)
		Unigene_519650	LHCA4	2.19918e-11	-4.82444	down	0.233909	-1.41319	normal	Chlorophyll A-B binding protein	Chlorophyll a-b binding protein 4, chloroplastic OS=Arabidopsis thaliana OX=3702 GN=LHCA4 PE=1 SV=1	chlorophyll a-b binding protein 1B-20, chloroplastic [Aegilops tauschii subsp. tauschii]	--	Photosynthesis - antenna proteins (ko00196)
		Unigene_179183	LHCA4	1.16193e-21	-6.20254	down	2.68449e-05	-3.78743	down	Chlorophyll A-B binding protein	Chlorophyll a-b binding protein 4, chloroplastic OS=Arabidopsis thaliana OX=3702 GN=LHCA4 PE=1 SV=1	chlorophyll a-b binding protein 1B-20, chloroplastic [Brachypodium distachyon]	--	Photosynthesis - antenna proteins (ko00196)
		Unigene_603752	LHCA4	6.91998e-11	-8.78345	down	1.02455e-05	-4.29623	down	Chlorophyll A-B binding protein	Chlorophyll a-b binding protein 4, chloroplastic OS=Arabidopsis thaliana OX=3702 GN=LHCA4 PE=1 SV=1	chlorophyll a-b binding protein P4, chloroplastic [Setaria italica]	--	Photosynthesis - antenna proteins (ko00196)
		Unigene_067154	LHCA6	5.04686e-11	-3.61431	down	0.0463102	-1.90844	normal	Chlorophyll A-B binding protein	Photosystem I chlorophyll a/b-binding protein 6, chloroplastic OS=Arabidopsis thaliana OX=3702 GN=LHCA6 PE=1 SV=1	photosystem I chlorophyll a/b-binding protein 6, chloroplastic-like [Aegilops tauschii subsp. tauschii]	molecular function: binding (GO:0005488);; cellular component: cell (GO:0005623);; cellular component: cell part (GO:0044464);; biological process: metabolic process (GO:0008152);; biological process: cellular process (GO:0009987);; biological process: response to stimulus (GO:0050896);; cellular component: organelle (GO:0043226);; cellular component: organelle part (GO:0044422);; cellular compon…	Photosynthesis - antenna proteins (ko00196)
		Unigene_522171	LHCA6	4.79887e-14	-8.73998	down	2.43365e-08	-4.05056	down	Chlorophyll A-B binding protein	Photosystem I chlorophyll a/b-binding protein 6, chloroplastic OS=Arabidopsis thaliana OX=3702 GN=LHCA6 PE=1 SV=1	predicted protein [Hordeum vulgare subsp. vulgare]	molecular function: binding (GO:0005488);; cellular component: cell (GO:0005623);; cellular component: cell part (GO:0044464);; biological process: metabolic process (GO:0008152);; biological process: cellular process (GO:0009987);; biological process: response to stimulus (GO:0050896);; cellular component: organelle (GO:0043226);; cellular component: organelle part (GO:0044422);; cellular compon…	Photosynthesis - antenna proteins (ko00196)
		Unigene_600629	LHCA6	3.43648e-09	-3.83532	down	0.0102857	-2.49112	normal	Chlorophyll A-B binding protein;; Chlorophyll A-B binding protein	Photosystem I chlorophyll a/b-binding protein 6, chloroplastic OS=Arabidopsis thaliana OX=3702 GN=LHCA6 PE=1 SV=1	photosystem I chlorophyll a/b-binding protein 6, chloroplastic [Brachypodium distachyon]	molecular function: binding (GO:0005488);; cellular component: cell (GO:0005623);; cellular component: cell part (GO:0044464);; biological process: metabolic process (GO:0008152);; biological process: cellular process (GO:0009987);; biological process: response to stimulus (GO:0050896);; cellular component: organelle (GO:0043226);; cellular component: organelle part (GO:0044422);; cellular compon…	Photosynthesis - antenna proteins (ko00196)
		Unigene_019143	LHCA6	0.0070429	-1.9498	down	0.770051	-0.442122	normal	Chlorophyll A-B binding protein	Photosystem I chlorophyll a/b-binding protein 6, chloroplastic OS=Arabidopsis thaliana OX=3702 GN=LHCA6 PE=1 SV=1	photosystem I chlorophyll a/b-binding protein 6, chloroplastic-like [Aegilops tauschii subsp. tauschii]	molecular function: binding (GO:0005488);; cellular component: cell (GO:0005623);; cellular component: cell part (GO:0044464);; biological process: metabolic process (GO:0008152);; biological process: cellular process (GO:0009987);; biological process: response to stimulus (GO:0050896);; cellular component: organelle (GO:0043226);; cellular component: organelle part (GO:0044422);; cellular compon…	Photosynthesis - antenna proteins (ko00196)
		Unigene_005216	LHCB4.1	1.43407e-05	-4.46834	down	0.176284	-1.75537	normal	Chlorophyll A-B binding protein	Chlorophyll a-b binding protein CP29.1, chloroplastic OS=Arabidopsis thaliana OX=3702 GN=LHCB4.1 PE=1 SV=1	hypothetical protein [Mycobacteroides abscessus]	molecular function: binding (GO:0005488);; cellular component: cell (GO:0005623);; cellular component: cell part (GO:0044464);; biological process: metabolic process (GO:0008152);; biological process: cellular process (GO:0009987);; biological process: response to stimulus (GO:0050896);; cellular component: organelle (GO:0043226);; cellular component: organelle part (GO:0044422);; cellular compon…	Photosynthesis - antenna proteins (ko00196)
		Unigene_516035	LHCB4.1	3.08349e-06	-7.03056	down	2.03913e-05	-4.36651	down	Chlorophyll A-B binding protein	Chlorophyll a-b binding protein CP29.1, chloroplastic OS=Arabidopsis thaliana OX=3702 GN=LHCB4.1 PE=1 SV=1	hypothetical protein [Mycobacteroides abscessus]	molecular function: binding (GO:0005488);; cellular component: cell (GO:0005623);; cellular component: cell part (GO:0044464);; biological process: metabolic process (GO:0008152);; biological process: cellular process (GO:0009987);; biological process: response to stimulus (GO:0050896);; cellular component: organelle (GO:0043226);; cellular component: organelle part (GO:0044422);; cellular compon…	Photosynthesis - antenna proteins (ko00196)
		Unigene_602039	LHCB5	1.0844e-07	-3.56848	down	0.298191	-1.24378	normal	Chlorophyll A-B binding protein	Chlorophyll a-b binding protein CP26, chloroplastic OS=Arabidopsis thaliana OX=3702 GN=LHCB5 PE=1 SV=1	chlorophyll a-b binding protein CP26, chloroplastic [Aegilops tauschii subsp. tauschii]	molecular function: binding (GO:0005488);; cellular component: cell (GO:0005623);; cellular component: cell part (GO:0044464);; biological process: metabolic process (GO:0008152);; biological process: cellular process (GO:0009987);; biological process: response to stimulus (GO:0050896);; cellular component: membrane (GO:0016020);; cellular component: macromolecular complex (GO:0032991);; cellular…	Photosynthesis - antenna proteins (ko00196)
		Unigene_006830	LHCB5	8.77583e-12	-4.31922	down	0.0741522	-1.87327	normal	Chlorophyll A-B binding protein	Chlorophyll a-b binding protein CP26, chloroplastic OS=Arabidopsis thaliana OX=3702 GN=LHCB5 PE=1 SV=1	Chlorophyll a-b binding protein CP26, chloroplastic [Triticum urartu]	molecular function: binding (GO:0005488);; cellular component: cell (GO:0005623);; cellular component: cell part (GO:0044464);; biological process: metabolic process (GO:0008152);; biological process: cellular process (GO:0009987);; biological process: response to stimulus (GO:0050896);; cellular component: membrane (GO:0016020);; cellular component: macromolecular complex (GO:0032991);; cellular…	Photosynthesis - antenna proteins (ko00196)
		Unigene_586166	LHCB7	0.000387727	-1.92537	down	0.747605	-0.306011	normal	Chlorophyll A-B binding protein	Chlorophyll a-b binding protein 7, chloroplastic OS=Arabidopsis thaliana OX=3702 GN=LHCB7 PE=2 SV=1	hypothetical protein CFC21_065545 [Triticum aestivum]	molecular function: binding (GO:0005488);; cellular component: cell (GO:0005623);; cellular component: cell part (GO:0044464);; biological process: metabolic process (GO:0008152);; biological process: cellular process (GO:0009987);; biological process: response to stimulus (GO:0050896);; cellular component: organelle (GO:0043226);; cellular component: organelle part (GO:0044422);; cellular compon…	Photosynthesis - antenna proteins (ko00196)
		Unigene_515416	OsI_012078	7.65088e-14	-6.71611	down	1.4374e-06	-3.79834	down	Chlorophyll A-B binding protein	Chlorophyll a-b binding protein, chloroplastic OS=Oryza sativa subsp. indica OX=39946 GN=OsI_012078 PE=2 SV=1	chlorophyll a-b binding protein, chloroplastic [Brachypodium distachyon]	molecular function: binding (GO:0005488);; cellular component: cell (GO:0005623);; cellular component: cell part (GO:0044464);; biological process: metabolic process (GO:0008152);; biological process: cellular process (GO:0009987);; biological process: response to stimulus (GO:0050896);; cellular component: organelle (GO:0043226);; cellular component: organelle part (GO:0044422);; cellular compon…	Photosynthesis - antenna proteins (ko00196)
		Unigene_604569	OsI_012078	1.11587e-07	-3.08545	down	0.126183	-1.61524	normal	Chlorophyll A-B binding protein;; RNA recognition motif. (a.k.a. RRM, RBD, or RNP domain)	Chlorophyll a-b binding protein, chloroplastic OS=Oryza sativa subsp. indica OX=39946 GN=OsI_012078 PE=2 SV=1	chlorophyll a-b binding protein, chloroplastic [Aegilops tauschii subsp. tauschii]	molecular function: binding (GO:0005488);; cellular component: cell (GO:0005623);; cellular component: cell part (GO:0044464);; biological process: metabolic process (GO:0008152);; biological process: cellular process (GO:0009987);; biological process: response to stimulus (GO:0050896);; cellular component: organelle (GO:0043226);; cellular component: organelle part (GO:0044422);; cellular compon…	Photosynthesis - antenna proteins (ko00196)
		Unigene_191413	WHAB1.6	0.0004066	-2.59937	down	0.282063	-1.11002	normal	Chlorophyll A-B binding protein	Chlorophyll a-b binding protein, chloroplastic OS=Triticum aestivum OX=4565 GN=WHAB1.6 PE=3 SV=1	chlorophyll a-b binding protein of LHCII type 1 [Brachypodium distachyon]	--	Photosynthesis - antenna proteins (ko00196)
		Unigene_524466	WHAB1.6	0.000183146	-2.36391	down	0.282495	-1.04078	normal	Chlorophyll A-B binding protein	Chlorophyll a-b binding protein, chloroplastic OS=Triticum aestivum OX=4565 GN=WHAB1.6 PE=3 SV=1	hypothetical protein [Mycobacteroides abscessus]	--	Photosynthesis - antenna proteins (ko00196)
		Unigene_029934	WHAB1.6	2.93144e-11	-8.22929	down	0.106856	-2.0284	normal	Chlorophyll A-B binding protein	Chlorophyll a-b binding protein, chloroplastic OS=Triticum aestivum OX=4565 GN=WHAB1.6 PE=3 SV=1	unnamed protein product [Triticum turgidum subsp. durum]	--	Photosynthesis - antenna proteins (ko00196)
	Chloroplast	Unigene_582444	ATJ20	0.000335316	-3.10408	down	0.353219	-1.29757	normal	DnaJ domain	Chaperone protein dnaJ 20, chloroplastic OS=Arabidopsis thaliana OX=3702 GN=ATJ20 PE=1 SV=2	unnamed protein product [Triticum aestivum]	cellular component: cell (GO:0005623);; cellular component: cell part (GO:0044464);; cellular component: organelle (GO:0043226);; biological process: biological regulation (GO:0065007);; biological process: cellular process (GO:0009987)	Photosynthesis (ko00195)
		Unigene_036437	PETE	0.00291657	-2.28183	down	3.68729e-07	-4.87526	down	Copper binding proteins, plastocyanin/azurin family;; Cupredoxin-like domain	Plastocyanin, chloroplastic OS=Oryza sativa subsp. indica OX=39946 GN=PETE PE=2 SV=1	plastocyanin, chloroplastic [Oryza sativa Japonica Group]	molecular function: binding (GO:0005488);; molecular function: electron carrier activity (GO:0009055)	Photosynthesis (ko00195)
		Unigene_070938	PPL1	0.0119488	-1.80209	normal	0.0015482	-1.99062	down	PsbP	PsbP-like protein 1, chloroplastic OS=Arabidopsis thaliana OX=3702 GN=PPL1 PE=1 SV=1	hypothetical protein BRADI_1g77047v3 [Brachypodium distachyon]	molecular function: binding (GO:0005488);; cellular component: cell (GO:0005623);; cellular component: cell part (GO:0044464);; cellular component: organelle (GO:0043226);; cellular component: membrane (GO:0016020);; cellular component: macromolecular complex (GO:0032991);; cellular component: membrane part (GO:0044425);; biological process: metabolic process (GO:0008152);; biological process: ce…	Photosynthesis (ko00195)
		Unigene_524552	PQL3	0.000682608	-2.75091	down	3.73944e-07	-6.32131	down	Protein of unknown function (DUF3755);; Oxygen evolving enhancer protein 3 (PsbQ)	PsbQ-like protein 3, chloroplastic OS=Arabidopsis thaliana OX=3702 GN=PQL3 PE=2 SV=1	hypothetical protein TRIUR3_14011 [Triticum urartu]	molecular function: binding (GO:0005488);; cellular component: cell (GO:0005623);; cellular component: membrane (GO:0016020);; cellular component: macromolecular complex (GO:0032991);; cellular component: membrane part (GO:0044425);; cellular component: cell part (GO:0044464);; biological process: metabolic process (GO:0008152);; biological process: cellular process (GO:0009987)	Photosynthesis (ko00195)
	Porphyrin and chlorophyll metabolism	Unigene_029907	DVR	3.37846e-22	2.73168	up	0.00597344	1.48481	up	NAD(P)H-binding;; NAD dependent epimerase/dehydratase family;; NmrA-like family;; KR domain;; Male sterility protein;; CCT motif	Divinyl chlorophyllide a 8-vinyl-reductase, chloroplastic OS=Zea mays OX=4577 GN=DVR PE=1 SV=1	divinyl chlorophyllide a 8-vinyl-reductase, chloroplastic [Hordeum vulgare]	molecular function: catalytic activity (GO:0003824);; molecular function: binding (GO:0005488);; cellular component: cell (GO:0005623);; cellular component: cell part (GO:0044464);; biological process: metabolic process (GO:0008152);; biological process: cellular process (GO:0009987);; cellular component: organelle (GO:0043226);; cellular component: organelle part (GO:0044422);; biological proces…	Porphyrin and chlorophyll metabolism (ko00860)
		Unigene_067454	CLH2	4.76829e-07	2.72469	up	0.0504278	1.5508	normal	Chlorophyllase;; Chlorophyllase enzyme;; Platelet-activating factor acetylhydrolase, isoform II;; Dienelactone hydrolase family;; Chlorophyllase enzyme;; Chlorophyllase	Chlorophyllase-2 OS=Arabidopsis thaliana OX=3702 GN=CLH2 PE=1 SV=1	unnamed protein product [Triticum turgidum subsp. durum]	molecular function: catalytic activity (GO:0003824);; cellular component: cell (GO:0005623);; cellular component: cell part (GO:0044464);; biological process: metabolic process (GO:0008152);; biological process: cellular process (GO:0009987);; cellular component: organelle (GO:0043226);; biological process: single-organism process (GO:0044699)	Porphyrin and chlorophyll metabolism (ko00860)
		Unigene_196004	CLH2	0.00142807	1.59066	up	0.22807	0.950349	normal	Chlorophyllase;; Chlorophyllase enzyme;; Dienelactone hydrolase family;; Platelet-activating factor acetylhydrolase, isoform II	Chlorophyllase-2 OS=Arabidopsis thaliana OX=3702 GN=CLH2 PE=1 SV=1	chlorophyllase-2, chloroplastic [Brachypodium distachyon]	molecular function: catalytic activity (GO:0003824);; cellular component: cell (GO:0005623);; cellular component: cell part (GO:0044464);; biological process: metabolic process (GO:0008152);; biological process: cellular process (GO:0009987);; cellular component: organelle (GO:0043226);; biological process: single-organism process (GO:0044699)	Porphyrin and chlorophyll metabolism (ko00860)
		Unigene_174084	HEMA3	0.00454649	1.36548	up	1.19001e-05	2.42483	up	Glutamyl-tRNAGlu reductase, N-terminal domain	Glutamyl-tRNA reductase 3, chloroplastic OS=Hordeum vulgare OX=4513 GN=HEMA3 PE=2 SV=1	glutamyl-tRNA reductase, chloroplastic [Brachypodium distachyon]	molecular function: catalytic activity (GO:0003824);; cellular component: cell (GO:0005623);; cellular component: cell part (GO:0044464);; biological process: metabolic process (GO:0008152);; biological process: cellular process (GO:0009987);; biological process: single-organism process (GO:0044699);; biological process: response to stimulus (GO:0050896);; cellular component: organelle (GO:004322…	Porphyrin and chlorophyll metabolism (ko00860)
		Unigene_069412	HEMH	3.30435e-07	2.20117	up	0.237628	0.927697	normal	Ferrochelatase	Ferrochelatase-2, chloroplastic OS=Hordeum vulgare OX=4513 GN=HEMH PE=2 SV=1	ferrochelatase [Hordeum vulgare]	molecular function: catalytic activity (GO:0003824);; cellular component: cell (GO:0005623);; cellular component: cell part (GO:0044464);; cellular component: organelle (GO:0043226);; biological process: metabolic process (GO:0008152);; biological process: cellular process (GO:0009987);; biological process: single-organism process (GO:0044699);; biological process: response to stimulus (GO:005089…	Porphyrin and chlorophyll metabolism (ko00860)
		Unigene_319086	HEMH	6.71848e-28	3.18756	up	0.00271636	1.71175	up	Ferrochelatase;; Ferrochelatase	Ferrochelatase-2, chloroplastic OS=Hordeum vulgare OX=4513 GN=HEMH PE=2 SV=1	ferrochelatase [Hordeum vulgare]	molecular function: catalytic activity (GO:0003824);; cellular component: cell (GO:0005623);; cellular component: cell part (GO:0044464);; cellular component: organelle (GO:0043226);; biological process: metabolic process (GO:0008152);; biological process: cellular process (GO:0009987);; biological process: single-organism process (GO:0044699);; biological process: response to stimulus (GO:005089…	Porphyrin and chlorophyll metabolism (ko00860)
		Unigene_066832	HO1	2.13132e-11	2.30892	up	0.145832	0.9971	normal	Heme oxygenase	Heme oxygenase 1, chloroplastic OS=Oryza sativa subsp. japonica OX=39947 GN=HO1 PE=2 SV=1	heme oxygenase 1, chloroplastic-like [Aegilops tauschii subsp. tauschii]	biological process: reproduction (GO:0000003);; biological process: reproductive process (GO:0022414);; biological process: developmental process (GO:0032502);; molecular function: catalytic activity (GO:0003824);; biological process: metabolic process (GO:0008152);; biological process: single-organism process (GO:0044699);; molecular function: binding (GO:0005488);; cellular component: cell (GO:…	Porphyrin and chlorophyll metabolism (ko00860)
		Unigene_192083	HO1	7.87401e-09	2.35885	up	0.115912	1.05904	normal	--	Heme oxygenase 1, chloroplastic OS=Oryza sativa subsp. japonica OX=39947 GN=HO1 PE=2 SV=1	hypothetical protein TRIUR3_24249 [Triticum urartu]	biological process: reproduction (GO:0000003);; biological process: reproductive process (GO:0022414);; biological process: developmental process (GO:0032502);; molecular function: catalytic activity (GO:0003824);; biological process: metabolic process (GO:0008152);; biological process: single-organism process (GO:0044699);; molecular function: binding (GO:0005488);; cellular component: cell (GO:…	Porphyrin and chlorophyll metabolism (ko00860)
		Unigene_071985	MES12	0.00211715	1.5876	up	0.858861	0.198661	normal	Alpha/beta hydrolase family;; alpha/beta hydrolase fold;; Serine aminopeptidase, S33	Putative methylesterase 12, chloroplastic OS=Arabidopsis thaliana OX=3702 GN=MES12 PE=2 SV=1	hypothetical protein CFC21_103342 [Triticum aestivum]	molecular function: catalytic activity (GO:0003824);; cellular component: cell (GO:0005623);; cellular component: membrane (GO:0016020);; cellular component: cell part (GO:0044464)	Porphyrin and chlorophyll metabolism (ko00860)
		Unigene_314524	MTP5	0.00172063	2.04609	up	0.542784	0.624753	normal	Cation efflux family;; Cation efflux family;; Dimerisation domain of Zinc Transporter	Metal tolerance protein 5 OS=Oryza sativa subsp. japonica OX=39947 GN=MTP5 PE=2 SV=1	unnamed protein product [Triticum turgidum subsp. durum]	biological process: localization (GO:0051179);; cellular component: cell (GO:0005623);; cellular component: membrane (GO:0016020);; cellular component: organelle (GO:0043226);; cellular component: organelle part (GO:0044422);; cellular component: cell part (GO:0044464);; molecular function: transporter activity (GO:0005215);; biological process: cellular process (GO:0009987);; biological process:…	Porphyrin and chlorophyll metabolism (ko00860)
		Unigene_074796	NOL	1.53486e-08	2.84882	up	0.0189448	1.66166	normal	short chain dehydrogenase;; short chain dehydrogenase;; Enoyl-(Acyl carrier protein) reductase	Chlorophyll(ide) b reductase NOL, chloroplastic OS=Oryza sativa subsp. japonica OX=39947 GN=NOL PE=1 SV=1	non-yellow coloring 1-like protein [Lolium perenne]	molecular function: catalytic activity (GO:0003824);; cellular component: cell (GO:0005623);; cellular component: cell part (GO:0044464);; biological process: metabolic process (GO:0008152);; biological process: cellular process (GO:0009987);; cellular component: organelle (GO:0043226);; biological process: single-organism process (GO:0044699)	Porphyrin and chlorophyll metabolism (ko00860)
		Unigene_198989	NOL	3.83458e-05	3.09891	up	1.98856e-05	3.2274	up	short chain dehydrogenase;; Enoyl-(Acyl carrier protein) reductase;; KR domain	Chlorophyll(ide) b reductase NOL, chloroplastic OS=Oryza sativa subsp. japonica OX=39947 GN=NOL PE=1 SV=1	non-yellow coloring 1-like protein [Lolium perenne]	molecular function: catalytic activity (GO:0003824);; cellular component: cell (GO:0005623);; cellular component: cell part (GO:0044464);; biological process: metabolic process (GO:0008152);; biological process: cellular process (GO:0009987);; cellular component: organelle (GO:0043226);; biological process: single-organism process (GO:0044699)	Porphyrin and chlorophyll metabolism (ko00860)
		Unigene_603531	NOL	4.83757e-06	2.52938	up	0.0609814	1.44272	normal	short chain dehydrogenase;; Enoyl-(Acyl carrier protein) reductase;; KR domain;; Polysaccharide biosynthesis protein	Chlorophyll(ide) b reductase NOL, chloroplastic OS=Oryza sativa subsp. japonica OX=39947 GN=NOL PE=1 SV=1	non-yellow coloring 1-like protein [Lolium perenne]	molecular function: catalytic activity (GO:0003824);; cellular component: cell (GO:0005623);; cellular component: cell part (GO:0044464);; biological process: metabolic process (GO:0008152);; biological process: cellular process (GO:0009987);; cellular component: organelle (GO:0043226);; biological process: single-organism process (GO:0044699)	Porphyrin and chlorophyll metabolism (ko00860)
		Unigene_038823	NYC1	1.24104e-27	2.36046	up	0.0246764	1.36518	normal	short chain dehydrogenase;; Enoyl-(Acyl carrier protein) reductase;; KR domain	Probable chlorophyll(ide) b reductase NYC1, chloroplastic OS=Oryza sativa subsp. japonica OX=39947 GN=NYC1 PE=1 SV=1	probable chlorophyll(ide) b reductase NYC1, chloroplastic [Aegilops tauschii subsp. tauschii]	molecular function: catalytic activity (GO:0003824);; cellular component: cell (GO:0005623);; cellular component: cell part (GO:0044464);; biological process: metabolic process (GO:0008152);; biological process: cellular process (GO:0009987);; cellular component: organelle (GO:0043226);; biological process: single-organism process (GO:0044699)	Porphyrin and chlorophyll metabolism (ko00860)
		Unigene_176394	NYC1	8.95706e-11	3.29531	up	0.276382	0.873779	normal	--	Probable chlorophyll(ide) b reductase NYC1, chloroplastic OS=Oryza sativa subsp. japonica OX=39947 GN=NYC1 PE=1 SV=1	putative chlorophyll(ide) b reductase NYC1, chloroplastic [Triticum urartu]	molecular function: catalytic activity (GO:0003824);; cellular component: cell (GO:0005623);; cellular component: cell part (GO:0044464);; biological process: metabolic process (GO:0008152);; biological process: cellular process (GO:0009987);; cellular component: organelle (GO:0043226);; biological process: single-organism process (GO:0044699)	Porphyrin and chlorophyll metabolism (ko00860)
		Unigene_073171	NYC1	8.4583e-09	3.16469	up	0.155116	1.15012	normal	short chain dehydrogenase	Probable chlorophyll(ide) b reductase NYC1, chloroplastic OS=Oryza sativa subsp. japonica OX=39947 GN=NYC1 PE=1 SV=1	hypothetical protein CFC21_034778 [Triticum aestivum]	molecular function: catalytic activity (GO:0003824);; cellular component: cell (GO:0005623);; cellular component: cell part (GO:0044464);; biological process: metabolic process (GO:0008152);; biological process: cellular process (GO:0009987);; cellular component: organelle (GO:0043226);; biological process: single-organism process (GO:0044699)	Porphyrin and chlorophyll metabolism (ko00860)
		Unigene_073537	PAO	3.43698e-15	2.47329	up	0.031792	1.23937	normal	Pheophorbide a oxygenase;; Rieske [2Fe-2S] domain;; Vanillate O-demethylase oxygenase C-terminal domain	Pheophorbide a oxygenase, chloroplastic OS=Oryza sativa subsp. japonica OX=39947 GN=PAO PE=2 SV=1	pheophorbide A oxygenase [Lolium perenne]	biological process: reproduction (GO:0000003);; biological process: immune system process (GO:0002376);; biological process: reproductive process (GO:0022414);; biological process: developmental process (GO:0032502);; molecular function: catalytic activity (GO:0003824);; molecular function: binding (GO:0005488);; cellular component: cell (GO:0005623);; cellular component: cell part (GO:0044464);;…	Porphyrin and chlorophyll metabolism (ko00860)
		Unigene_321718	PAO	1.47125e-09	2.60226	up	0.0170769	1.3558	normal	Rieske [2Fe-2S] domain;; Pheophorbide a oxygenase;; Vanillate O-demethylase oxygenase C-terminal domain;; Pheophorbide a oxygenase	Pheophorbide a oxygenase, chloroplastic OS=Oryza sativa subsp. japonica OX=39947 GN=PAO PE=2 SV=1	pheophorbide A oxygenase [Lolium perenne]	biological process: reproduction (GO:0000003);; biological process: immune system process (GO:0002376);; biological process: reproductive process (GO:0022414);; biological process: developmental process (GO:0032502);; molecular function: catalytic activity (GO:0003824);; molecular function: binding (GO:0005488);; cellular component: cell (GO:0005623);; cellular component: cell part (GO:0044464);;…	Porphyrin and chlorophyll metabolism (ko00860)
		Unigene_198201	PTC52	0.0063058	1.85547	up	0.464317	0.720091	normal	Pheophorbide a oxygenase;; Rieske [2Fe-2S] domain;; Vanillate O-demethylase oxygenase C-terminal domain	Protochlorophyllide-dependent translocon component 52, chloroplastic OS=Arabidopsis thaliana OX=3702 GN=PTC52 PE=2 SV=1	hypothetical protein CFC21_068350 [Triticum aestivum]	cellular component: cell (GO:0005623);; cellular component: cell part (GO:0044464);; cellular component: organelle (GO:0043226);; cellular component: organelle part (GO:0044422);; molecular function: catalytic activity (GO:0003824);; biological process: metabolic process (GO:0008152);; biological process: single-organism process (GO:0044699);; molecular function: binding (GO:0005488)	Porphyrin and chlorophyll metabolism (ko00860)
		Unigene_324046	PTC52	0.00737013	1.90491	up	0.634925	0.514816	normal	Rieske [2Fe-2S] domain;; Pheophorbide a oxygenase;; Vanillate O-demethylase oxygenase C-terminal domain	Protochlorophyllide-dependent translocon component 52, chloroplastic OS=Arabidopsis thaliana OX=3702 GN=PTC52 PE=2 SV=1	cell death suppressor protein Lls1, putative, expressed [Oryza sativa Japonica Group]	cellular component: cell (GO:0005623);; cellular component: cell part (GO:0044464);; cellular component: organelle (GO:0043226);; cellular component: organelle part (GO:0044422);; molecular function: catalytic activity (GO:0003824);; biological process: metabolic process (GO:0008152);; biological process: single-organism process (GO:0044699);; molecular function: binding (GO:0005488)	Porphyrin and chlorophyll metabolism (ko00860)
		Unigene_044175	SGR	4.80807e-37	4.98671	up	4.80198e-06	2.61128	up	Staygreen protein	Protein STAY-GREEN, chloroplastic OS=Oryza sativa subsp. indica OX=39946 GN=SGR PE=3 SV=1	STAY-GREEN 1a [Lolium perenne]	cellular component: cell (GO:0005623);; cellular component: cell part (GO:0044464);; cellular component: organelle (GO:0043226);; cellular component: organelle part (GO:0044422);; cellular component: membrane (GO:0016020)	Porphyrin and chlorophyll metabolism (ko00860)
		Unigene_314403	SGR	1.02315e-16	4.76101	up	2.38892e-06	2.92415	up	Staygreen protein	Protein STAY-GREEN, chloroplastic OS=Oryza sativa subsp. japonica OX=39947 GN=SGR PE=1 SV=1	senescence-inducible chloroplast non-yellowing protein 1 [Lolium arundinaceum]	cellular component: cell (GO:0005623);; cellular component: cell part (GO:0044464);; cellular component: organelle (GO:0043226);; cellular component: organelle part (GO:0044422);; cellular component: membrane (GO:0016020)	Porphyrin and chlorophyll metabolism (ko00860)
		Unigene_527335	UPM1	0.00170286	2.67062	up	0.00696524	2.74939	up	Tetrapyrrole (Corrin/Porphyrin) Methylases	S-adenosyl-L-methionine-dependent uroporphyrinogen III methyltransferase, chloroplastic OS=Arabidopsis thaliana OX=3702 GN=UPM1 PE=1 SV=1	uncharacterized protein LOC109770081 [Aegilops tauschii subsp. tauschii]	molecular function: catalytic activity (GO:0003824);; biological process: metabolic process (GO:0008152)	Porphyrin and chlorophyll metabolism (ko00860)

## Sheet: Co-induced
Gene classification	Fuction categories	ID	Gene name	R0_vs_R3_DESeq2_FDR	R0_vs_R3_DESeq2_log2FC	R0_vs_R3_regulated	R0_vs_R6_DESeq2_FDR	R0_vs_R6_DESeq2_log2FC	R0_vs_R6_regulated	S0_vs_S3_DESeq2_FDR	S0_vs_S3_DESeq2_log2FC	S0_vs_S3_regulated	S0_vs_S6_DESeq2_FDR	S0_vs_S6_DESeq2_log2FC	S0_vs_S6_regulated	L0_vs_L3_DESeq2_FDR	L0_vs_L3_DESeq2_log2FC	L0_vs_L3_regulated	L0_vs_L2_DESeq2_FDR	L0_vs_L6_DESeq2_log2FC	L0_vs_L6_regulated	Pfam_annotation	Swissprot_annotation	TrEMBL_annotation	nr_annotation	GO_second_level_annotation	KEGG_pathway_annotation
Circadian clocks	pseudo-response regulator(PRR)	Unigene_523659	PRR37	--	--	--	5.96829e-05	2.92941	up	0.0119674	-2.56277	normal	0.000345917	-2.98842	down	4.4658e-05	-2.14041	down	0.388947	-0.688464	normal	CCT motif;; Response regulator receiver domain	Two-component response regulator-like PRR37 OS=Oryza sativa subsp. indica OX=39946 GN=PRR37 PE=2 SV=2	Pseudo-response regulator OS=Triticum monococcum subsp. aegilopoides OX=52163 GN=Ppd-A1 PE=3 SV=1	pseudo-response regulator [Triticum monococcum subsp. aegilopoides]	biological process: cellular process (GO:0009987);; biological process: signaling (GO:0023052);; biological process: single-organism process (GO:0044699);; biological process: response to stimulus (GO:0050896);; biological process: biological regulation (GO:0065007);; molecular function: binding (GO:0005488);; cellular component: cell (GO:0005623);; cellular component: cell part (GO:0044464);; ce…	Circadian rhythm - plant (ko04712)
	Adagio protein	Unigene_074056	Os11g0547000	0.0096128	-2.74822	down	0.000141076	-4.98584	down	1.67747e-05	5.88864	up	--	--	--	7.67836e-08	5.30007	up	3.34163e-05	4.17663	up	Galactose oxidase, central domain;; Galactose oxidase, central domain;; Kelch motif;; Kelch motif;; Kelch motif;; Kelch motif;; F-box domain	Adagio-like protein 3 OS=Oryza sativa subsp. japonica OX=39947 GN=Os11g0547000 PE=2 SV=2	PAS domain-containing protein OS=Brachypodium distachyon OX=15368 GN=100845844 PE=3 SV=1	adagio-like protein 3 isoform X1 [Brachypodium distachyon]	molecular function: binding (GO:0005488);; cellular component: cell (GO:0005623);; cellular component: cell part (GO:0044464);; cellular component: organelle (GO:0043226);; biological process: biological regulation (GO:0065007);; biological process: rhythmic process (GO:0048511);; biological process: response to stimulus (GO:0050896)	Circadian rhythm - plant (ko04712)
photosynthesis	Electron transport chain	Unigene_183317	FDX3	0.00021918	5.43698	up	0.157431	2.43738	normal	0.00848964	-3.14684	down	0.425407	-1.48293	normal	7.5962e-12	-6.23369	down	0.0024212	-2.82639	down	2Fe-2S iron-sulfur cluster binding domain	Ferredoxin-3, chloroplastic OS=Zea mays OX=4577 GN=FDX3 PE=1 SV=1	Ferredoxin OS=Setaria italica OX=4555 PE=3 SV=1	ferredoxin-3, chloroplastic [Brachypodium distachyon]	molecular function: electron carrier activity (GO:0009055);; molecular function: binding (GO:0005488)	Photosynthesis (ko00195)
