# Supplementary material for: Tissue-Specific Transcriptomic Analysis Reveals the Response Mechanism of Cold Stress in Poa crymophila, a Native Grass in Qinghai-Tibet Plateau
Source: Preprints.org preprint supplement (doi:10.20944/preprints202311.0336.v1), 2023-11-06
Supplement: Supplementary file 7 [file Table S12 The hub genes were selected in the brown module and the salmon module.xlsx]

## Sheet: Sheet1
Table S12 The hub genes were selected in the brown module and the salmon module
Code	Module	ID	Gene name	R0_vs_R3_DESeq2_FDR	R0_vs_R3_DESeq2_log2FC	R0_vs_R3_regulated	R0_vs_R6_DESeq2_FDR	R0_vs_R6_DESeq2_log2FC	R0_vs_R6_regulated	S0_vs_S3_DESeq2_FDR	S0_vs_S3_DESeq2_log2FC	S0_vs_S3_regulated	S0_vs_S6_DESeq2_FDR	S0_vs_S6_DESeq2_log2FC	S0_vs_S6_regulated	L0_vs_L3_DESeq2_FDR	L0_vs_L3_DESeq2_log2FC	L0_vs_L3_regulated	L0_vs_L2_DESeq2_FDR	L0_vs_L6_DESeq2_log2FC	L0_vs_L6_regulated	Pfam_annotation	Swissprot_annotation	TrEMBL_annotation	eggNOG_class_annotation	nr_annotation
1	brown	Unigene_600094	At4g13040	0.000886407	4.21597	up	9.64351e-05	2.02998	up	7.94008e-05	2.17048	up	0.00453152	1.11143	normal	6.95833e-05	4.36346	up	5.48409e-05	5.49535	up	AP2 domain	Ethylene-responsive transcription factor-like protein At4g13040 OS=Arabidopsis thaliana OX=3702 GN=At4g13040 PE=2 SV=2	AP2/ERF domain-containing protein OS=Aegilops tauschii subsp. strangulata OX=200361 PE=4 SV=1	Transcription	ethylene-responsive transcription factor-like protein At4g13040 [Aegilops tauschii subsp. tauschii]
2	brown	Unigene_023873	BLH1	0.554292	-0.845603	normal	0.174966	-0.542164	normal	0.00167875	3.5291	up	0.0567035	2.67931	normal	1.49367e-12	2.20793	up	0.158929	0.927524	normal	Associated with HOX;; Homeobox KN domain;; Homeodomain	BEL1-like homeodomain protein 1 OS=Arabidopsis thaliana OX=3702 GN=BLH1 PE=1 SV=1	Homeobox domain-containing protein OS=Triticum turgidum subsp. durum OX=4567 GN=TRITD_4Av1G147830 PE=3 SV=1	Transcription	hypothetical protein CFC21_052801 [Triticum aestivum]
3	brown	Unigene_019968	ABCC2	0.566633	-0.904001	normal	0.82124	-0.186053	normal	5.35585e-05	4.64999	up	0.000349246	4.18452	up	5.70802e-13	3.23588	up	0.000557599	2.18786	up	ABC transporter transmembrane region;; ABC transporter;; 50S ribosome-binding GTPase	ABC transporter C family member 2 OS=Arabidopsis thaliana OX=3702 GN=ABCC2 PE=1 SV=2	Uncharacterized protein OS=Triticum aestivum OX=4565 GN=CAMPLR22A2D_LOCUS4632 PE=4 SV=1	Secondary metabolites biosynthesis, transport and catabolism	unnamed protein product [Triticum aestivum]
4	brown	Unigene_069200	At3g17800	0.611858	-0.829749	normal	0.146133	-1.16569	normal	0.0169975	2.69649	normal	0.211308	1.62934	normal	4.78074e-21	3.08462	up	9.14065e-05	2.06813	up	Protein of unknown function (DUF760)	UV-B-induced protein At3g17800, chloroplastic OS=Arabidopsis thaliana OX=3702 GN=At3g17800 PE=2 SV=1	Uncharacterized protein OS=Aegilops tauschii subsp. strangulata OX=200361 PE=4 SV=1	Function unknown	UV-B-induced protein [Hordeum vulgare]
5	brown	Unigene_325532	FTSH1	0.795809	-0.390753	normal	0.738929	0.282953	normal	0.00117515	3.21377	up	0.029916	2.03744	normal	6.4986e-47	3.97294	up	5.95919e-10	2.85819	up	Peptidase family M41;; ATPase family associated with various cellular activities (AAA);; AAA+ lid domain;; AAA domain (dynein-related subfamily)	ATP-dependent zinc metalloprotease FTSH 1, chloroplastic OS=Oryza sativa subsp. japonica OX=39947 GN=FTSH1 PE=2 SV=1	AAA domain-containing protein OS=Triticum aestivum OX=4565 PE=3 SV=1	Posttranslational modification, protein turnover, chaperones	hypothetical protein CFC21_100673 [Triticum aestivum]
6	brown	Unigene_075399	ABC1K7	0.243785	-1.34573	normal	0.71527	0.263558	normal	2.22383e-06	5.14214	up	5.93353e-05	4.55363	up	8.88617e-47	3.82973	up	1.55521e-07	2.67326	up	ABC1 family	Protein ACTIVITY OF BC1 COMPLEX KINASE 7, chloroplastic OS=Arabidopsis thaliana OX=3702 GN=ABC1K7 PE=1 SV=1	ABC1 domain-containing protein OS=Triticum turgidum subsp. durum OX=4567 GN=TRITD_5Bv1G103480 PE=4 SV=1	Function unknown	unnamed protein product [Triticum turgidum subsp. durum]
7	salmon	Unigene_530024	CTR1	0.855313	0.298408	normal	0.131184	0.806717	normal	2.97647e-05	4.20745	up	0.536197	0.625137	normal	7.91569e-05	5.24515	up	4.88803e-06	4.65974	up	Protein tyrosine and serine/threonine kinase;; Protein kinase domain;; PB1 domain	Serine/threonine-protein kinase CTR1 OS=Arabidopsis thaliana OX=3702 GN=CTR1 PE=1 SV=1	Predicted protein OS=Hordeum vulgare subsp. vulgare OX=112509 PE=2 SV=1	Signal transduction mechanisms	Serine/threonine-protein kinase CTR1 [Hordeum vulgare]
8	salmon	Unigene_605651	CARB	0.655433	0.66001	normal	0.0382158	0.997928	normal	0.595994	0.696264	normal	0.993611	0.0114171	normal	5.46763e-08	3.32166	up	7.87222e-05	2.24875	up	Carbamoyl-phosphate synthase L chain, ATP binding domain;; Carbamoyl-phosphate synthetase large chain, oligomerisation domain;; MGS-like domain;; D-ala D-ala ligase C-terminus;; ATP-grasp domain;; ATP-grasp domain	Carbamoyl-phosphate synthase large chain, chloroplastic OS=Oryza sativa subsp. japonica OX=39947 GN=CARB PE=2 SV=1	Carbamoyl-phosphate synthase (glutamine-hydrolyzing) OS=Aegilops tauschii subsp. strangulata OX=200361 PE=3 SV=1	Nucleotide transport and metabolism	carbamoyl-phosphate synthase large chain, chloroplastic [Aegilops tauschii subsp. tauschii]
9	salmon	Unigene_595662	GLCAT14A	0.419054	1.06279	normal	0.220968	0.632643	normal	0.654301	0.576268	normal	9.65754e-05	2.04693	up	5.74579e-06	2.40231	up	0.835742	-0.246355	normal	Core-2/I-Branching enzyme	Beta-glucuronosyltransferase GlcAT14A OS=Arabidopsis thaliana OX=3702 GN=GLCAT14A PE=2 SV=1	Uncharacterized protein OS=Triticum aestivum OX=4565 PE=4 SV=1	Carbohydrate transport and metabolism	--
