# Supplementary material for: Tissue-Specific Transcriptomic Analysis Reveals the Response Mechanism of Cold Stress in Poa crymophila, a Native Grass in Qinghai-Tibet Plateau
Source: Preprints.org preprint supplement (doi:10.20944/preprints202311.0336.v1), 2023-11-06
Supplement: Supplementary file 9 [file Table S13 Primers used for qRT-PCR analysis.xlsx]

## Sheet: Sheet1
Table S13 Primers used for qRT-PCR analysis.
Number	Gene id	Forward primer (5'-3')	Reverse primer (5'-3')
1	Unigene_192368	ACCAGACAGATGAGAGACAGA	ACCGAATGCTCGTGAAACT
2	Unigene_074320	TGATGAGCATGAAACCTCTCC	CTAATTGCGGCACCAGATAAAC
3	Unigene_510813	ACGACGACTACAGCAAGTTC	CATGGGTAATCCGTCCTTGT
4	Unigene_318616	GGAGATCGTGTTCAAGGAGATG	GGCAGTCGAGTTCAGAAGAAT
5	Unigene_501903	AGCTACGAGTACCAGGAAGAA	GCCAGTGACTCGCATATTGA
6	Unigene_074258	TGCTTTCGGGTCGAATACATAC	CAGCGACCATGAGGATGATAAG
7	Unigene_173800	TTGGCTCTGAAACCATCTCC	CTGGGAAGTCTGGATCTTCTTC
8	Unigene_005233	GGAAGCCATTGAGGCCATTA	TGACTCCACCACACCATCTA
9	Unigene_512552	GGGAGGATTGGAACTGAAAGAT	TATTGGGCTGTACCCATCAAC
10	Unigene_446153	CAAGGAACTTCACGTCCTACTC	GTTGCGCGACAGAAGAGATA
11	Unigene_593975	GTTTCCTCGCTGCTCGTC	CATCCGCACCCTTGTTGT
12	Unigene_020992	GCAAACCGCTCCCAGAT	CTTGGCGTCCGAGACATT
13	reference gene	TGTTGGATTCTGGTGATGGTGTC	AGGATGGCGTGCGGAAGG
