# Supplementary material for: Tissue-Specific Transcriptomic Analysis Reveals the Response Mechanism of Cold Stress in Poa crymophila, a Native Grass in Qinghai-Tibet Plateau
Source: Preprints.org preprint supplement (doi:10.20944/preprints202311.0336.v1), 2023-11-06
Supplement: Supplementary file 11 [file Table S2 Statistics of assembly results.xlsx]

## Sheet: Sheet1
Table S2 Statistics of assembly results
Length Range	Transcript	Unigene
200-300	332,070 (17.77%)	0(0%)
300-500	293,629 (15.71%)	5,450 (10.11%)
500-1000	440,467 (23.57%)	7,113 (13.20%)
1000-2000	517,074 (27.67%)	12,276 (22.78%)
2000+	285,269 (15.27%)	29,054 (53.91%)
Total Number (bp)	1868509	53893
Total Length (pb)	2070806890	120919618
N50 Length	1681	2941
Mean Length (bp)	1108.27	2243.7
