# Supplementary material for: Tissue-Specific Transcriptomic Analysis Reveals the Response Mechanism of Cold Stress in Poa crymophila, a Native Grass in Qinghai-Tibet Plateau
Source: Preprints.org preprint supplement (doi:10.20944/preprints202311.0336.v1), 2023-11-06
Supplement: Supplementary file 13 [file Table S3 BLAST analysis of transcripts against public databases.xlsx]

## Sheet: Sheet1
Table S3 BLAST analysis of transcripts against public databases
Annotated databases	Annotated Number	Percentage (%)	300<=length<1000	length>=1000
COG Annotation	14647	0.2718	1355	13292
GO Annotation	30563	0.5671	4201	26354
KEGG Annotation	33579	0.6231	4630	28949
KOG Annotation	25555	0.4742	3150	22405
Pfam Annotation	36693	0.6808	4621	32072
Swissprot Annotation	34815	0.646	4997	29818
TrEMBL Annotation	46193	0.8571	8409	37784
eggNOG Annotation	39560	0.734	6503	33057
Nr Annotation	44710	0.8296	8130	36580
All Annotated	46542	0.8636	8532	38002
