# Supplementary material for: Tissue-Specific Transcriptomic Analysis Reveals the Response Mechanism of Cold Stress in Poa crymophila, a Native Grass in Qinghai-Tibet Plateau
Source: Preprints.org preprint supplement (doi:10.20944/preprints202311.0336.v1), 2023-11-06
Supplement: Supplementary file 15 [file Table S4 The top 25 significantly enriched GO terms of DEGs in roots, stems, and leaves under cold stress.xlsx]

## Sheet: Sheet1
Table S4 The top 25 significantly enriched GO terms of DEGs in roots, stems, and leaves under cold stress.
Tissue	3 d								6 d
Roots	category	goterm	Description	Rich_factor	p-value	termnumber	up_regulated	down_regulated	category	goterm	Description	Rich_factor	p-value	termnumber	up_regulated	down_regulated
	GO:0005372	MF	water transmembrane transporter activity	4.88	9.07565e-08	22	21	1	GO:0031226	CC	intrinsic component of plasma membrane	3.04	3.22983e-10	52	37	15
	GO:0015250	MF	water channel activity	4.88	9.07565e-08	22	21	1	GO:0005372	MF	water transmembrane transporter activity	8.44	2.71098e-09	17	14	3
	GO:0071944	CC	cell periphery	1.28	1.56083e-06	415	396	19	GO:0015250	MF	water channel activity	8.44	2.71098e-09	17	14	3
	GO:0050896	BP	response to stimulus	1.2	3.25711e-06	693	650	40	GO:0022857	MF	transmembrane transporter activity	2.01	1.3052e-08	96	52	44
	GO:0022803	MF	passive transmembrane transporter activity	2.84	3.55397e-06	36	34	2	GO:0005887	CC	integral component of plasma membrane	3.4	1.51297e-08	37	26	11
	GO:0015267	MF	channel activity	2.62	2.48617e-05	36	34	2	GO:0044459	CC	obsolete plasma membrane part	2.47	6.23468e-08	55	38	17
	GO:0006833	BP	water transport	3.75	3.50197e-05	23	22	1	GO:0071944	CC	cell periphery	1.46	6.23468e-08	205	121	84
	GO:0005886	CC	plasma membrane	1.27	3.62495e-05	359	346	13	GO:0006833	BP	water transport	6.45	4.1156e-07	18	15	3
	GO:0005911	CC	cell-cell junction	1.51	3.62495e-05	145	137	8	GO:0042044	BP	fluid transport	6.29	4.1156e-07	18	15	3
	GO:0030054	CC	cell junction	1.5	3.62495e-05	146	138	8	GO:0005215	MF	transporter activity	1.87	2.3876e-06	87	43	44
	GO:0009506	CC	plasmodesma	1.51	3.62495e-05	142	134	8	GO:0004601	MF	peroxidase activity	3.32	2.45698e-06	29	25	4
	GO:0055044	CC	symplast	1.51	3.62495e-05	142	134	8	GO:0031224	CC	intrinsic component of membrane	1.9	7.36428e-06	72	44	28
	GO:0042044	BP	fluid transport	3.66	3.90231e-05	23	22	1	GO:0042807	CC	central vacuole	12.6	3.37943e-05	7	5	2
	GO:0005773	CC	vacuole	1.45	4.90749e-05	166	154	12	GO:0005886	CC	plasma membrane	1.4	4.02882e-05	171	92	79
	GO:0006950	BP	response to stress	1.26	5.52413e-05	425	401	24	GO:0015318	MF	inorganic molecular entity transmembrane transporter activity	2.06	4.43332e-05	55	31	24
	GO:1901700	BP	response to oxygen-containing compound	1.34	0.00013136	264	251	13	GO:0030312	CC	external encapsulating structure	1.99	6.50579e-05	53	42	11
	GO:0042221	BP	response to chemical	1.25	0.00013136	409	390	19	GO:0005618	CC	cell wall	1.96	8.04719e-05	54	43	11
	GO:0001101	BP	response to acid chemical	1.41	0.00013136	201	189	12	GO:0055085	BP	transmembrane transport	1.63	9.99777e-05	113	62	51
	GO:0016773	MF	phosphotransferase activity, alcohol group as acceptor	1.5	0.000156936	142	139	3	GO:0022803	MF	passive transmembrane transporter activity	3.54	0.000102383	20	14	6
	GO:0009505	CC	plant-type cell wall	1.87	0.000452991	54	46	8	GO:0050896	BP	response to stimulus	1.38	0.000110901	206	110	96
	GO:0031224	CC	intrinsic component of membrane	1.46	0.000452991	128	122	6	GO:1902074	BP	response to cold	7.96	0.000110901	10	10	0
	GO:0031226	CC	intrinsic component of plasma membrane	1.7	0.000869987	67	65	2	GO:0006811	BP	ion transport	1.85	0.000110901	73	34	39
	GO:0016301	MF	kinase activity	1.43	0.00100255	150	147	3	GO:0009609	BP	response to symbiotic bacterium	17.2	0.000110901	6	6	0
	GO:0000325	CC	plant-type vacuole	1.81	0.00224016	49	40	9	GO:0034220	BP	ion transmembrane transport	1.96	0.000114975	62	34	28
	GO:0016772	MF	transferase activity, transferring phosphorus-containing groups	1.39	0.00229474	157	153	4	GO:0010555	BP	response to mannitol	7.54	0.000128733	10	1	9
Stems	goterm	category	Description	Rich_factor	p-value	termnumber	up_regulated	down_regulated	goterm	category	Description	Rich_factor	p-value	termnumber	up_regulated	down_regulated
	GO:0050896	BP	response to stimulus	2.97	1.29649e-06	999	703	296	GO:0044434	CC	obsolete chloroplast part	1.41	1.64013e-11	400	359	41
	GO:0009507	CC	chloroplast	1.2	2.54186e-06	492	430	62	GO:0044435	CC	obsolete plastid part	1.4	1.64013e-11	406	364	42
	GO:0001101	BP	response to acid chemical	1.28	3.74636e-06	289	176	113	GO:0009507	CC	chloroplast	1.29	1.64013e-11	618	539	79
	GO:0009536	CC	plastid	1.19	4.3345e-06	503	438	65	GO:0009536	CC	plastid	1.29	1.64013e-11	633	551	82
	GO:0080167	BP	response to karrikin	1.82	1.04332e-05	53	39	14	GO:0042651	CC	thylakoid membrane	1.61	1.54737e-05	113	101	12
	GO:0003714	MF	transcription corepressor activity	2.75	1.48459e-05	20	5	15	GO:0009941	CC	chloroplast envelope	1.42	1.72485e-05	190	173	17
	GO:0044434	CC	obsolete chloroplast part	1.23	5.76445e-05	300	273	27	GO:0044436	CC	obsolete thylakoid part	1.56	2.05773e-05	121	110	11
	GO:0008079	MF	translation termination factor activity	3.82	9.37334e-05	10	10	0	GO:0009526	CC	plastid envelope	1.4	2.94211e-05	196	178	18
	GO:0003747	MF	translation release factor activity	1.09	0.00019342	10	10	0	GO:0009534	CC	chloroplast thylakoid	1.52	2.94211e-05	129	114	15
	GO:0010218	BP	response to far red light	2.08	0.000197172	26	25	1	GO:0009532	CC	plastid stroma	1.36	2.96717e-05	225	200	25
	GO:0003700	MF	DNA-binding transcription factor activity	1.25	0.000198752	219	123	96	GO:0034357	CC	photosynthetic membrane	1.58	2.96717e-05	109	98	11
	GO:0044435	CC	obsolete plastid part	1.2	0.000201066	301	274	27	GO:0009535	CC	chloroplast thylakoid membrane	1.6	3.61686e-05	101	90	11
	GO:0010200	BP	response to chitin	1.81	0.000223058	37	5	32	GO:0031976	CC	plastid thylakoid	1.51	3.61686e-05	129	114	15
	GO:0009570	CC	chloroplast stroma	1.28	0.000275409	179	160	19	GO:0009579	CC	thylakoid	1.44	4.73429e-05	154	139	15
	GO:1901700	BP	response to oxygen-containing compound	1.17	0.000408009	366	232	134	GO:0009570	CC	chloroplast stroma	1.35	4.74709e-05	220	196	24
	GO:0070141	BP	response to UV-A	3.52	0.000426271	9	9	0	GO:0031967	CC	organelle envelope	1.3	5.0188e-05	275	251	24
	GO:0071492	BP	cellular response to UV-A	3.52	0.000426271	9	9	0	GO:0031975	CC	envelope	1.3	5.0188e-05	275	251	24
	GO:0016757	MF	transferase activity, transferring glycosyl groups	1.42	0.000545143	85	66	19	GO:0001101	BP	response to acid chemical	1.32	7.32896e-05	345	225	120
	GO:0009532	CC	plastid stroma	1.26	0.000599799	179	160	19	GO:0055035	CC	plastid thylakoid membrane	1.56	9.3123e-05	101	90	11
	GO:0009941	CC	chloroplast envelope	1.29	0.000619491	148	137	11	GO:0004564	MF	beta-fructofuranosidase activity	3.02	0.000560652	23	16	7
	GO:2000022	BP	regulation of jasmonic acid mediated signaling pathway	3.11	0.000697172	22	3	19	GO:1901700	BP	response to oxygen-containing compound	1.23	0.00113717	446	295	151
	GO:0005342	MF	organic acid transmembrane transporter activity	1.7	0.000846033	37	27	10	GO:0009501	CC	amyloplast	2.8	0.00225822	16	15	1
	GO:0046943	MF	carboxylic acid transmembrane transporter activity	1.7	0.000846033	37	27	10	GO:0009628	BP	response to abiotic stimulus	1.19	0.00572634	530	401	129
	GO:1901618	MF	organic hydroxy compound transmembrane transporter activity	3	0.000969651	10	2	8	GO:0042221	BP	response to stimulus	1.15	0.00849144	693	496	197
	GO:0009526	CC	plastid envelope	1.26	0.00137828	152	140	12	GO:0048046	CC	apoplast	1.44	0.00964647	84	69	15
Leaves	goterm	category	Description	Rich_factor	p-value	termnumber	up_regulated	down_regulated	category	goterm	Description	Rich_factor	p-value	termnumber	up_regulated	down_regulated
	GO:0044435	CC	obsolete plastid part	1.39	1.33383e-32	885	272	613	GO:0044435	CC	obsolete plastid part	1.59	6.07714e-16	317	183	134
	GO:0009536	CC	plastid	1.29	1.33383e-32	1285	469	816	GO:0044434	CC	obsolete chloroplast part	1.6	6.07714e-16	311	177	134
	GO:0044434	CC	obsolete chloroplast part	1.4	1.33383e-32	869	264	605	GO:0009536	CC	plastid	1.42	6.3909e-16	479	169	120
	GO:0009507	CC	chloroplast	1.29	7.28141e-32	1346	440	906	GO:0009507	CC	chloroplast	1.42	3.46894e-15	464	254	210
	GO:0009579	CC	thylakoid	1.57	1.36909e-22	365	81	248	GO:0080167	BP	response to karrikin	2.58	3.76526e-09	62	48	14
	GO:0009535	CC	chloroplast thylakoid membrane	1.74	2.52613e-22	240	58	182	GO:0055085	BP	transmembrane transport	1.47	3.76526e-09	292	214	78
	GO:0055035	CC	plastid thylakoid membrane	1.73	2.52613e-22	245	59	186	GO:0009523	CC	photosystem II	3.6	9.19294e-09	31	12	19
	GO:0009526	CC	plastid envelope	1.48	7.47861e-22	453	149	304	GO:0004553	MF	hydrolase activity, hydrolyzing O-glycosyl compounds	1.89	1.30007e-08	116	61	55
	GO:0031976	CC	plastid thylakoid	1.62	8.73112e-22	303	73	230	GO:0022857	MF	transmembrane transporter activity	1.54	1.32584e-08	224	154	70
	GO:0009534	CC	chloroplast thylakoid	1.62	1.28594e-21	300	72	228	GO:0010287	CC	plastoglobule	3.17	1.50404e-08	36	29	7
	GO:0044436	CC	S	1.64	3.69823e-21	278	70	208	GO:0009532	CC	plastid stroma	1.58	1.75622e-08	179	100	79
	GO:0009941	CC	chloroplast envelope	1.47	1.56829e-20	430	139	219	GO:0010114	BP	response to red light	3.51	2.39741e-08	34	28	6
	GO:0034357	CC	photosynthetic membrane	1.67	4.05462e-20	251	61	190	GO:0071486	BP	cellular response to high light intensity	6.67	2.39741e-08	16	13	3
	GO:0042651	CC	thylakoid membrane	1.65	6.97233e-20	254	61	193	GO:0090056	BP	regulation of chlorophyll metabolic process	4.39	2.39741e-08	25	20	5
	GO:0015979	BP	photosynthesis	1.88	1.42722e-17	166	31	135	GO:0009570	CC	chloroplast stroma	1.58	2.43618e-08	176	100	76
	GO:0009532	CC	plastid stroma	1.36	3.71265e-15	492	128	364	GO:0010380	BP	regulation of chlorophyll biosynthetic process	5	3.40721e-08	21	18	3
	GO:0009570	CC	chloroplast stroma	1.36	4.42319e-15	485	128	357	GO:0015979	BP	photosynthesis	2.29	3.48561e-08	67	21	46
	GO:0031967	CC	organelle envelope	1.3	2.84433e-14	603	212	391	GO:0004564	MF	beta-fructofuranosidase activity	4.33	4.68736e-08	24	18	6
	GO:0031975	CC	envelope	1.3	2.84433e-14	603	212	391	GO:1901463	BP	regulation of tetrapyrrole biosynthetic process	4.77	7.68791e-08	21	18	3
	GO:0009522	CC	photosystem I	2.93	2.24318e-12	33	0	33	GO:0071491	BP	cellular response to red light	7	7.68791e-08	14	13	1
	GO:0031969	CC	chloroplast membrane	1.65	3.13543e-09	121	53	68	GO:0016798	MF	hydrolase activity, acting on glycosyl bonds	1.97	1.04402e-07	88	43	45
	GO:0051186	BP	obsolete cofactor metabolic process	1.43	7.48344e-09	269	99	170	GO:1901401	BP	regulation of tetrapyrrole metabolic process	4.03	1.08165e-07	25	20	5
	GO:0042170	CC	plastid membrane	1.61	7.65206e-09	128	57	71	GO:0009628	BP	response to abiotic stimulus	1.32	1.13705e-07	417	233	148
	GO:0009523	CC	photosystem II	2.04	1.52357e-08	56	16	40	GO:0001101	BP	response to acid chemical	1.43	1.34541e-07	266	149	117
	GO:0031984	CC	organelle subcompartment	1.2	7.26794e-07	609	216	393	GO:0070141	BP	response to UV-A	6.67	1.34541e-07	14	13	1
