# Supplementary material for: Tissue-Specific Transcriptomic Analysis Reveals the Response Mechanism of Cold Stress in Poa crymophila, a Native Grass in Qinghai-Tibet Plateau
Source: Preprints.org preprint supplement (doi:10.20944/preprints202311.0336.v1), 2023-11-06
Supplement: Supplementary file 17 [file Table S5 The top 20 significantly enriched KEGG pathway of DEGs in roots, stems, and leaves under cold stress.xlsx]

## Sheet: Sheet1
Table S5 The top 20 significantly enriched KEGG pathway of DEGs in roots, stems, and leaves under cold stress.
Tissue	3 d								6 d
Roots	Pathway id	KEGG pathway	rich_factor	P-value	Corrected_P-value	termnumber	up_regulated	down_regulated	Pathway id	KEGG pathway	rich_factor	P-value	Corrected_P-value	termnumber	up_regulated	down_regulated
	ko00500	Starch and sucrose metabolism	2.16792	4.7332e-05	0.00780978	69	64	5	ko00940	Phenylpropanoid biosynthesis	2.11075	3.32888e-06	0.000432754	43	35	8
	ko00052	Galactose metabolism	4.58993	8.21807e-05	0.0135598	34	30	4	ko00531	Glycosaminoglycan degradation	3.69041	0.000362713	0.0471527	10	9	1
	ko00940	Phenylpropanoid biosynthesis	3.98849	9.2129e-05	0.0152013	68	66	8	ko00340	Histidine metabolism	4.28826	0.00112442	0.146174	7	7	0
	ko04016	MAPK signaling pathway - plant	2.50411	0.000460011	0.0759018	71	69	9	ko00330	Arginine and proline metabolism	2.53743	0.00131907	0.17148	14	10	4
	ko00520	Amino sugar and nucleotide sugar metabolism	2.56694	0.00144893	0.239073	47	47	0	ko00270	Cysteine and methionine metabolism	1.9204	0.0042156	0.548028	20	16	4
	ko00280	Valine, leucine and isoleucine degradation	2.81404	0.00395796	0.653063	23	23		ko04075	Plant hormone signal transduction	2.26248	0.0052017	0.67622	48	17	31
	ko00360	Phenylalanine metabolism	2.90034	0.00505939	0.834799	19	19	0	ko03030	DNA replication	2.31173	0.0060151	0.781963	12	10	2
	ko00100	Steroid biosynthesis	2.2689	0.00592106	0.976975	12	12	0	ko03040	Spliceosome	1.58604	0.00701722	0.912239	32	2	30
	ko04971	Gastric acid secretion	6.01224	0.139657	1	1	1	0	ko00511	Other glycan degradation	1.43721	0.00726615	0.944599	13	10	3
	ko00650	Butanoate metabolism	6.30082	0.201997	1	9	9	0	ko00710	Carbon fixation in photosynthetic organisms	2.09183	0.00753725	0.979843	14	7	7
	ko00625	Chloroalkane and chloroalkene degradation	6.45061	0.259823	1	1	1	0	ko04971	Gastric acid secretion	15.3152	0.0642306	1	1	0	1
	ko04371	Apelin signaling pathway	6.76049	0.313462	1	1	1	0	ko04970	Salivary secretion	15.3152	0.0642306	1	1	0	1
	ko00010	Glycolysis / Gluconeogenesis	6.60488	0.160392	1	2	2	0	ko04972	Pancreatic secretion	15.3152	0.0642306	1	1	0	1
	ko00220	Arginine biosynthesis	1.72531	0.0443057	1	2	2	0	ko04976	Bile secretion	10.2101	0.0947845	1	1	0	1
	ko00250	Alanine, aspartate and glutamate metabolism	1.69191	0.016785	1	2	2	0	ko00626	Naphthalene degradation	7.65761	0.124343	1	1	1	0
	ko00430	Taurine and hypotaurine metabolism	1.65629	0.270266	1	3	3	0	ko00625	Chloroalkane and chloroalkene degradation	7.65761	0.124343	1	1	1	0
	ko00515	Mannose type O-glycan biosynthesis	3.62382	0.161723	1	1	1	0	ko05017	Spinocerebellar ataxia	6.12609	0.152937	1	1	1	0
	ko00260	Glycine, serine and threonine metabolism	3.57334	0.0230701	1	2	2	0	ko04111	Cell cycle - yeast	4.71237	0.0654242	1	2	0	2
	ko00330	Arginine and proline metabolism	3.55175	0.03722	1	2	2	0	ko04113	Meiosis - yeast	3.8288	0.233249	1	1	0	1
	ko00532	Glycosaminoglycan biosynthesis-chondroitin sulfate/dermatan sulfate	3.5149	0.138249	1	1	1	0	ko00603	Glycosphingolipid biosynthesis - globo and isoglobo series	3.8288	0.0421109	1	3	3	0
Stems	Pathway id	KEGG pathway	rich_factor	P-value	Corrected_P-value	termnumber	up_regulated	down_regulated	Pathway id	KEGG pathway	rich_factor	P-value	Corrected_P-value	termnumber	up_regulated	down_regulated
	ko04712	Circadian rhythm - plant	1.82355	0.00013471	0.025595	39	36	3	ko00195	Photosynthesis	1.81511	8.02788e-05	0.0151727	41	36	5
	ko00591	Linoleic acid metabolism	2.27287	0.000830632	0.15782	17	4	13	ko00500	Starch and sucrose metabolism	1.39539	8.11508e-05	0.0153375	118	80	38
	ko00620	Pyruvate metabolism	4.27834	0.0697175	1	2	2	0	ko00052	Galactose metabolism	1.56074	0.000608769	0.115057	52	34	18
	ko04071	Sphingolipid signaling pathway	4.27834	0.220084	1	1	1	0	ko00710	Carbon fixation in photosynthetic organisms	1.55489	0.00147807	0.279355	45	42	3
	ko05203	Viral carcinogenesis	3.11152	0.031218	1	4	4	0	ko00620	Pyruvate metabolism	1.49124	0.00178206	0.336809	52	48	4
	ko00471	D-Glutamine and D-glutamate metabolism	2.85223	0.311241	1	1	1	0	ko00010	Glycolysis / Gluconeogenesis	1.39313	0.00206979	0.39119	71	61	10
	ko04666	Fc gamma R-mediated phagocytosis	2.85223	0.311241	1	1	1	0	ko01502	Vancomycin resistance	3.54168	0.0982442	1	2	1	1
	ko00601	Glycosphingolipid biosynthesis - lacto and neolacto series	2.85223	0.311241	1	1	1	0	ko00550	Peptidoglycan biosynthesis	3.54168	0.0403097	1	3	2	1
	ko04072	Phospholipase D signaling pathway	2.85223	0.311241	1	1	1	0	ko04972	Pancreatic secretion	3.54168	0.262428	1	1	1	0
	ko05034	Alcoholism	2.85223	0.311241	1	1	0	1	ko04071	Sphingolipid signaling pathway	3.54168	0.262428	1	1	1	0
	ko04370	VEGF signaling pathway	2.85223	0.311241	1	1	1	0	ko00473	D-Alanine metabolism	3.54168	0.0982442	1	2	1	1
	ko00550	Peptidoglycan biosynthesis	2.85223	0.148881	1	2	2	0	ko04971	Gastric acid secretion	3.54168	0.262428	1	1	1	0
	ko00250	Alanine, aspartate and glutamate metabolism	2.85223	0.148881	1	2	1	1	ko04970	Salivary secretion	3.54168	0.262428	1	1	1	0
	ko00430	Taurine and hypotaurine metabolism	2.85223	0.311241	1	1	0	1	ko05203	Viral carcinogenesis	2.57577	0.0574365	1	4	4	0
	ko00515	Mannose type O-glycan biosynthesis	2.567	0.102079	1	3	1	2	ko00966	Glucosinolate biosynthesis	2.36112	0.0492838	1	5	2	3
	ko00260	Glycine, serine and threonine metabolism	2.44477	0.192906	1	2	1	1	ko05202	Transcriptional misregulation in cancer	2.36112	0.202959	1	2	1	1
	ko04020	Calcium signaling pathway	2.44477	0.192906	1	2	2	0	ko04612	Antigen processing and presentation	2.36112	0.366568	1	1	1	0
	ko00998	Biosynthesis of various secondary metabolites - part 2	2.44477	0.0291486	1	6	5	1	ko04214	Apoptosis - fly	2.36112	0.122468	1	3	3	0
	ko00473	D-Alanine metabolism	2.13917	0.391749	1	1	1	0	ko05034	Alcoholism	2.36112	0.366568	1	1	0	1
	ko04371	Apelin signaling pathway	2.13917	0.391749	1	1	1	0	ko04666	Fc gamma R-mediated phagocytosis	2.36112	0.366568	1	1	1	0
Leaves	Pathway id	KEGG pathway	rich_factor	P-value	Corrected_P-value	termnumber	up_regulated	down_regulated	Pathway id	KEGG pathway	rich_factor	P-value	Corrected_P-value	termnumber	up_regulated	down_regulated
	ko00195	Photosynthesis	1.96923	1.45166e-14	3.55658e-12	95	15	80	ko00500	Starch and sucrose metabolism	1.88289	8.15181e-12	1.42657e-09	115	64	51
	ko00860	Porphyrin and chlorophyll metabolism	1.6704	5.37388e-07	0.00013166	69	23	46	ko00052	Galactose metabolism	2.4103	1.32811e-10	2.32418e-08	58	22	36
	ko00196	Photosynthesis - antenna proteins	2.02681	2.37006e-06	0.000580664	33	0	33	ko00195	Photosynthesis	2.51315	1.86932e-08	3.27132e-06	41	11	30
	ko01200	Carbon metabolism	1.24081	1.37544e-05	0.00336982	266	102	164	ko00480	Glutathione metabolism	1.89922	6.13199e-07	0.00010731	61	37	24
	ko01230	Biosynthesis of amino acids	1.25653	1.78036e-05	0.00436188	233	70	163	ko04712	Circadian rhythm - plant	2.03651	1.5366e-05	0.00268906	38	26	12
	ko00500	Starch and sucrose metabolism	1.25687	2.22817e-05	0.00545901	227	94	133	ko00330	Arginine and proline metabolism	2.03112	3.47371e-05	0.00607899	35	21	14
	ko00480	Glutathione metabolism	1.33717	6.8213e-05	0.0167122	127	60	67	ko00073	Cutin, suberine and wax biosynthesis	2.07839	4.62416e-05	0.00809228	32	21	11
	ko00330	Arginine and proline metabolism	1.41299	0.000380337	0.0931826	72	36	36	ko02010	ABC transporters	1.70242	0.000223578	0.0391261	46	42	4
	ko04712	Circadian rhythm - plant	1.39551	0.000386099	0.0945943	77	56	21	ko01212	Fatty acid metabolism	1.7788	0.00037201	0.0651017	37	20	17
	ko00052	Galactose metabolism	1.33507	0.000560772	0.137389	95	37	58	ko01230	Biosynthesis of amino acids	1.3555	0.0022107	0.386872	85	42	43
	ko00053	Ascorbate and aldarate metabolism	1.40955	0.000589521	0.144433	68	28	40	ko00061	Fatty acid biosynthesis	1.86422	0.00239752	0.419566	23	18	5
	ko00400	Phenylalanine, tyrosine and tryptophan biosynthesis	1.40495	0.00120788	0.295931	61	11	50	ko00941	Flavonoid biosynthesis	1.55284	0.00406761	0.711831	38	20	18
	ko00460	Cyanoamino acid metabolism	1.36326	0.00183301	0.449087	67	48	19	ko04916	Melanogenesis	9.80742	0.101964	1	1	0	1
	ko00900	Terpenoid backbone biosynthesis	1.40624	0.00237893	0.582837	53	10	43	ko04971	Gastric acid secretion	9.80742	0.0103912	1	2	2	0
	ko00240	Pyrimidine metabolism	1.33449	0.00320114	0.784279	68	28	40	ko04972	Pancreatic secretion	9.80742	0.0103912	1	2	2	0
	ko00010	Glycolysis / Gluconeogenesis	1.2219	0.00346364	0.848591	133	65	68	ko04970	Salivary secretion	9.80742	0.0103912	1	2	2	0
	ko00410	beta-Alanine metabolism	1.38645	0.00402468	0.986046	51	17	34	ko04114	Oocyte meiosis	9.80742	0.101964	1	1	0	1
	ko05161	Hepatitis B	3.31659	0.0908983	1	2	1	1	ko04668	TNF signaling pathway	9.80742	0.101964	1	1	0	1
	ko00473	D-Alanine metabolism	3.31659	0.00825797	1	4	0	4	ko04976	Bile secretion	6.53828	0.0290566	1	2	2	0
	ko05167	Kaposi sarcoma-associated herpesvirus infection	3.31659	0.301514	1	1	1	0	ko04912	GnRH signaling pathway	4.90371	0.193536	1	1	0	1
