# Supplementary material for: Tissue-Specific Transcriptomic Analysis Reveals the Response Mechanism of Cold Stress in Poa crymophila, a Native Grass in Qinghai-Tibet Plateau
Source: Preprints.org preprint supplement (doi:10.20944/preprints202311.0336.v1), 2023-11-06
Supplement: Supplementary file 19 [file Table S6 Differentially expressed genes involved in the TFs of roots, stems and leaves under cold stress.xlsx]

## Sheet: Roots
Table S6 Differentially expressed genes involved in the TFs of roots, stems and leaves under cold stress.
TF familiy	ID	Gene name	R0_vs_R3_DESeq2_FDR	R0_vs_R3_DESeq2_log2FC	R0_vs_R3_regulated	R0_vs_R6_DESeq2_FDR	R0_vs_R6_DESeq2_log2FC	R0_vs_R6_regulated	Pfam_annotation	Swissprot_annotation	nr_annotation	GO_second_level_annotation	KEGG_pathway_annotation
bHLH	Unigene_521396	BHLH30	0.666368	0.485123	normal	0.00538473	4.04601	up	Helix-loop-helix DNA-binding domain	Transcription factor bHLH30 OS=Arabidopsis thaliana OX=3702 GN=BHLH30 PE=1 SV=1	hypothetical protein CFC21_034691 [Triticum aestivum]	molecular function: binding (GO:0005488)	--
	Unigene_596158	BHLH35	0.0315475	3.08515	normal	5.99277e-05	5.66185	up	Helix-loop-helix DNA-binding domain	Transcription factor bHLH35 OS=Arabidopsis thaliana OX=3702 GN=BHLH35 PE=2 SV=1	unnamed protein product [Triticum turgidum subsp. durum]	molecular function: nucleic acid binding transcription factor activity (GO:0001071);; biological process: biological regulation (GO:0065007);; molecular function: binding (GO:0005488)	MAPK signaling pathway - plant (ko04016);; Plant hormone signal transduction (ko04075)
	Unigene_189089	BHLH35	0.36861	1.14622	normal	0.00402725	3.52796	up	Helix-loop-helix DNA-binding domain	Transcription factor bHLH35 OS=Arabidopsis thaliana OX=3702 GN=BHLH35 PE=2 SV=1	unnamed protein product [Triticum turgidum subsp. durum]	molecular function: nucleic acid binding transcription factor activity (GO:0001071);; biological process: biological regulation (GO:0065007);; molecular function: binding (GO:0005488)	MAPK signaling pathway - plant (ko04016);; Plant hormone signal transduction (ko04075)
	Unigene_068664	BHLH41	0.00170305	2.12581	up	0.169796	1.92249	normal	Helix-loop-helix DNA-binding domain	Putative transcription factor bHLH041 OS=Arabidopsis thaliana OX=3702 GN=BHLH41 PE=3 SV=1	unnamed protein product [Triticum turgidum subsp. durum]	molecular function: nucleic acid binding transcription factor activity (GO:0001071);; biological process: biological regulation (GO:0065007);; biological process: response to stimulus (GO:0050896);; molecular function: binding (GO:0005488)	MAPK signaling pathway - plant (ko04016);; Plant hormone signal transduction (ko04075)
	Unigene_055917	BHLH148	0.177398	1.86176	normal	0.00468708	3.7714	up	Helix-loop-helix DNA-binding domain	Transcription factor BHLH148 OS=Oryza sativa subsp. japonica OX=39947 GN=BHLH148 PE=1 SV=1	bHLH92a [Leymus chinensis]	biological process: response to stimulus (GO:0050896);; molecular function: nucleic acid binding transcription factor activity (GO:0001071);; biological process: biological regulation (GO:0065007);; cellular component: cell (GO:0005623);; cellular component: cell part (GO:0044464);; cellular component: organelle (GO:0043226);; molecular function: binding (GO:0005488)	--
	Unigene_519090	BHLH153	0.0882346	2.77692	normal	0.00145424	4.56269	up	--	Transcription factor bHLH153 OS=Arabidopsis thaliana OX=3702 GN=BHLH153 PE=1 SV=1	hypothetical protein CFC21_024282 [Triticum aestivum]	molecular function: binding (GO:0005488);; molecular function: nucleic acid binding transcription factor activity (GO:0001071);; biological process: biological regulation (GO:0065007);; biological process: response to stimulus (GO:0050896);; biological process: metabolic process (GO:0008152);; biological process: cellular process (GO:0009987);; cellular component: cell (GO:0005623);; cellular com…	--
WRKY	Unigene_196848	WRKY24	0.00317069	3.26833	up	8.67078e-05	5.06679	up	WRKY DNA -binding domain	WRKY transcription factor WRKY24 OS=Oryza sativa subsp. indica OX=39946 GN=WRKY24 PE=2 SV=1	WRKY27 transcription factor [Triticum aestivum]	biological process: response to stimulus (GO:0050896);; molecular function: nucleic acid binding transcription factor activity (GO:0001071);; biological process: biological regulation (GO:0065007);; cellular component: cell (GO:0005623);; cellular component: cell part (GO:0044464);; cellular component: organelle (GO:0043226);; molecular function: binding (GO:0005488)	MAPK signaling pathway - plant (ko04016);; Plant-pathogen interaction (ko04626)
	Unigene_322277	WRKY24	0.0157013	1.74071	normal	0.00961898	2.20224	up	WRKY DNA -binding domain	WRKY transcription factor WRKY24 OS=Oryza sativa subsp. indica OX=39946 GN=WRKY24 PE=2 SV=1	--	biological process: response to stimulus (GO:0050896);; molecular function: nucleic acid binding transcription factor activity (GO:0001071);; biological process: biological regulation (GO:0065007);; cellular component: cell (GO:0005623);; cellular component: cell part (GO:0044464);; cellular component: organelle (GO:0043226);; molecular function: binding (GO:0005488)	MAPK signaling pathway - plant (ko04016);; Plant-pathogen interaction (ko04626)
	Unigene_512589	WRKY24	0.0288009	3.45878	normal	8.32064e-05	5.79941	up	WRKY DNA -binding domain	WRKY transcription factor WRKY24 OS=Oryza sativa subsp. indica OX=39946 GN=WRKY24 PE=2 SV=1	WRKY protein, partial [Avena sativa]	molecular function: binding (GO:0005488);; biological process: response to stimulus (GO:0050896);; molecular function: nucleic acid binding transcription factor activity (GO:0001071);; biological process: biological regulation (GO:0065007);; cellular component: cell (GO:0005623);; cellular component: cell part (GO:0044464);; cellular component: organelle (GO:0043226);; biological process: metabol…	MAPK signaling pathway - plant (ko04016);; Plant-pathogen interaction (ko04626)
	Unigene_299532	WRKY30	3.49118e-05	2.67615	up	0.00337066	2.89741	up	WRKY DNA -binding domain	Probable WRKY transcription factor 30 OS=Arabidopsis thaliana OX=3702 GN=WRKY30 PE=1 SV=1	unnamed protein product [Triticum aestivum]	biological process: response to stimulus (GO:0050896);; biological process: immune system process (GO:0002376);; molecular function: binding (GO:0005488);; molecular function: nucleic acid binding transcription factor activity (GO:0001071);; biological process: biological regulation (GO:0065007);; cellular component: cell (GO:0005623);; cellular component: cell part (GO:0044464);; cellular compon…	--
	Unigene_518241	WRKY41	0.059374	2.40816	normal	0.000504311	4.64799	up	WRKY DNA -binding domain;; WRKY DNA -binding domain	Probable WRKY transcription factor 41 OS=Arabidopsis thaliana OX=3702 GN=WRKY41 PE=1 SV=2	drought resistance protein [Agropyron mongolicum]	biological process: response to stimulus (GO:0050896);; biological process: immune system process (GO:0002376);; molecular function: binding (GO:0005488);; molecular function: nucleic acid binding transcription factor activity (GO:0001071);; biological process: biological regulation (GO:0065007);; cellular component: cell (GO:0005623);; cellular component: cell part (GO:0044464);; cellular compon…	--
	Unigene_519180	WRKY46	--	--	--	4.897e-07	7.49917	up	WRKY DNA -binding domain	Probable WRKY transcription factor 46 OS=Arabidopsis thaliana OX=3702 GN=WRKY46 PE=1 SV=1	putative WRKY transcription factor 46 [Hordeum vulgare]	molecular function: nucleic acid binding transcription factor activity (GO:0001071);; biological process: biological regulation (GO:0065007);; molecular function: binding (GO:0005488)	Plant-pathogen interaction (ko04626)
	Unigene_519966	WRKY46	0.0158848	3.48003	normal	0.00014919	5.24828	up	WRKY DNA -binding domain	Probable WRKY transcription factor 46 OS=Arabidopsis thaliana OX=3702 GN=WRKY46 PE=1 SV=1	WRKY transcription factor, partial [Triticum aestivum]	molecular function: nucleic acid binding transcription factor activity (GO:0001071);; biological process: biological regulation (GO:0065007);; molecular function: binding (GO:0005488)	Plant-pathogen interaction (ko04626)
	Unigene_509435	WRKY50	--	--	--	0.00115274	4.75558	up	WRKY DNA -binding domain	Probable WRKY transcription factor 50 OS=Arabidopsis thaliana OX=3702 GN=WRKY50 PE=2 SV=1	WRKY1 [Lolium perenne]	molecular function: nucleic acid binding transcription factor activity (GO:0001071);; biological process: biological regulation (GO:0065007);; molecular function: binding (GO:0005488)	MAPK signaling pathway - plant (ko04016);; Plant-pathogen interaction (ko04626)
	Unigene_315177	WRKY53	9.79308e-07	1.91226	up	0.0242937	2.09059	normal	WRKY DNA -binding domain	Probable WRKY transcription factor 53 OS=Arabidopsis thaliana OX=3702 GN=WRKY53 PE=1 SV=1	WRKY transcription factor WRKY1A [Triticum aestivum]	biological process: response to stimulus (GO:0050896);; biological process: immune system process (GO:0002376);; molecular function: binding (GO:0005488);; molecular function: nucleic acid binding transcription factor activity (GO:0001071);; biological process: biological regulation (GO:0065007);; cellular component: cell (GO:0005623);; cellular component: cell part (GO:0044464);; cellular compon…	Plant-pathogen interaction (ko04626)
	Unigene_596092	WRKY57	0.0861155	2.09728	normal	0.00941523	3.36291	up	WRKY DNA -binding domain	Probable WRKY transcription factor 57 OS=Arabidopsis thaliana OX=3702 GN=WRKY57 PE=2 SV=1	unnamed protein product [Triticum turgidum subsp. durum]	molecular function: binding (GO:0005488);; biological process: response to stimulus (GO:0050896);; molecular function: nucleic acid binding transcription factor activity (GO:0001071);; biological process: biological regulation (GO:0065007)	Spliceosome (ko03040)
	Unigene_512949	WRKY70	--	--	--	6.08012e-06	6.9651	up	WRKY DNA -binding domain	WRKY DNA-binding transcription factor 70 OS=Solanum lycopersicum OX=4081 GN=WRKY70 PE=2 SV=1	WRKY transcription factor 146 [Triticum aestivum]	biological process: response to stimulus (GO:0050896);; biological process: immune system process (GO:0002376);; biological process: biological regulation (GO:0065007);; molecular function: nucleic acid binding transcription factor activity (GO:0001071);; biological process: cellular process (GO:0009987);; biological process: signaling (GO:0023052);; biological process: single-organism process (G…	Plant-pathogen interaction (ko04626)
	Unigene_065706	WRKY71	0.0870039	2.74839	normal	0.000504311	5.18139	up	WRKY DNA -binding domain	WRKY transcription factor WRKY71 OS=Oryza sativa subsp. indica OX=39946 GN=WRKY71 PE=1 SV=1	WRKY4 transcription factor, partial [Stipa purpurea]	molecular function: nucleic acid binding transcription factor activity (GO:0001071);; biological process: biological regulation (GO:0065007);; molecular function: binding (GO:0005488)	Plant-pathogen interaction (ko04626)
bZIP	Unigene_006620	RISBZ3	0.0625699	3.11758	normal	0.00239814	4.40362	up	bZIP transcription factor;; Basic region leucine zipper	bZIP transcription factor RISBZ3 OS=Oryza sativa subsp. japonica OX=39947 GN=RISBZ3 PE=1 SV=1	hypothetical protein CFC21_087707 [Triticum aestivum]	molecular function: nucleic acid binding transcription factor activity (GO:0001071);; biological process: biological regulation (GO:0065007)	--
	Unigene_191055	RISBZ3	0.00905821	-1.19546	down	0.828352	-0.474705	normal	bZIP transcription factor;; Basic region leucine zipper	bZIP transcription factor RISBZ3 OS=Oryza sativa subsp. japonica OX=39947 GN=RISBZ3 PE=1 SV=1	hypothetical protein CFC21_087707 [Triticum aestivum]	molecular function: nucleic acid binding transcription factor activity (GO:0001071);; biological process: biological regulation (GO:0065007)	--
	Unigene_013892	RISBZ4	0.00503944	-2.22272	down	0.701571	-0.802156	normal	bZIP transcription factor;; Basic region leucine zipper;; bZIP Maf transcription factor	bZIP transcription factor RISBZ4 OS=Oryza sativa subsp. japonica OX=39947 GN=RISBZ4 PE=2 SV=2	unnamed protein product [Triticum turgidum subsp. durum]	molecular function: nucleic acid binding transcription factor activity (GO:0001071);; biological process: biological regulation (GO:0065007)	Plant hormone signal transduction (ko04075)
	Unigene_313433	RISBZ5	0.258841	-1.23216	normal	0.00405999	3.82469	up	bZIP transcription factor;; Basic region leucine zipper	bZIP transcription factor RISBZ5 OS=Oryza sativa subsp. japonica OX=39947 GN=RISBZ5 PE=2 SV=1	bZIP transcription factor RISBZ5 isoform X1 [Brachypodium distachyon]	molecular function: nucleic acid binding transcription factor activity (GO:0001071);; biological process: biological regulation (GO:0065007)	MAPK signaling pathway - plant (ko04016);; Plant-pathogen interaction (ko04626)
	Unigene_316449	BZIP44	0.00689677	-1.51908	down	0.964828	0.102177	normal	bZIP transcription factor;; Basic region leucine zipper	--	bZIP transcription factor 44 [Brachypodium distachyon]	molecular function: nucleic acid binding transcription factor activity (GO:0001071);; biological process: biological regulation (GO:0065007)	--
	Unigene_516706	BZIP12	0.325808	1.26423	normal	0.00118827	4.50713	up	bZIP transcription factor;; Basic region leucine zipper	bZIP transcription factor 12 OS=Oryza sativa subsp. japonica OX=39947 GN=BZIP12 PE=2 SV=1	hypothetical protein CFC21_037075 [Triticum aestivum]	molecular function: binding (GO:0005488);; molecular function: nucleic acid binding transcription factor activity (GO:0001071);; biological process: biological regulation (GO:0065007);; cellular component: cell (GO:0005623);; cellular component: cell part (GO:0044464);; cellular component: organelle (GO:0043226)	Plant hormone signal transduction (ko04075)
	Unigene_601308	BZIP1-A	0.165585	1.85814	normal	0.00995154	3.61007	up	G-box binding protein MFMR;; Disordered region downstream of MFMR;; bZIP transcription factor;; Basic region leucine zipper	bZIP transcription factor 1-A OS=Triticum aestivum OX=4565 GN=BZIP1-A PE=2 SV=1	bZIP transcription factor 16-like isoform X1 [Aegilops tauschii subsp. tauschii]	molecular function: nucleic acid binding transcription factor activity (GO:0001071);; biological process: biological regulation (GO:0065007)	--
MYB	Unigene_030659	MYBS2	--	--	--	2.8877e-05	6.31936	up	--	Transcription factor MYBS2 OS=Oryza sativa subsp. indica OX=39946 GN=MYBS2 PE=3 SV=1	predicted protein [Hordeum vulgare subsp. vulgare]	biological process: response to stimulus (GO:0050896);; molecular function: nucleic acid binding transcription factor activity (GO:0001071);; biological process: biological regulation (GO:0065007)	--
	Unigene_038301	MYB2	--	--	--	3.26246e-05	5.5491	up	--	Transcription factor MYB2 OS=Oryza sativa subsp. japonica OX=39947 GN=MYB2 PE=2 SV=1	hypothetical protein CFC21_043444 [Triticum aestivum]	--	--
	Unigene_302567	MYB30	--	--	--	0.000913222	4.51338	up	--	Transcription factor MYB30 OS=Oryza sativa subsp. japonica OX=39947 GN=MYB30 PE=1 SV=1	Myb-related protein Myb4 [Triticum urartu]	--	--
	Unigene_058865	MYBAS1	0.0463388	3.26638	normal	0.00433292	4.40234	up	--	Myb-related protein MYBAS1 OS=Oryza sativa subsp. japonica OX=39947 GN=MYBAS1 PE=2 SV=1	hypothetical protein CFC21_083790 [Triticum aestivum]	--	--
	Unigene_511796	MYBAS2	0.0809572	2.91019	normal	4.66897e-06	7.0314	up	Myb-like DNA-binding domain;; Myb-like DNA-binding domain	Myb-related protein MYBAS2 OS=Oryza sativa subsp. japonica OX=39947 GN=MYBAS2 PE=2 SV=1	unnamed protein product [Triticum turgidum subsp. durum]	molecular function: nucleic acid binding transcription factor activity (GO:0001071);; biological process: biological regulation (GO:0065007);; molecular function: transcription factor activity, protein binding (GO:0000988);; molecular function: binding (GO:0005488);; biological process: response to stimulus (GO:0050896);; cellular component: cell (GO:0005623);; cellular component: cell part (GO:0…	--
BEL1	Unigene_526379	BLH2	--	--	--	0.00138791	4.20636	up	Associated with HOX;; Homeobox KN domain	BEL1-like homeodomain protein 2 OS=Arabidopsis thaliana OX=3702 GN=BLH2 PE=1 SV=3	hypothetical protein CFC21_059399 [Triticum aestivum]	molecular function: binding (GO:0005488);; molecular function: nucleic acid binding transcription factor activity (GO:0001071);; biological process: biological regulation (GO:0065007);; cellular component: cell (GO:0005623);; cellular component: cell part (GO:0044464);; cellular component: organelle (GO:0043226);; cellular component: cell junction (GO:0030054);; cellular component: symplast (GO:0…	--
	Unigene_524323	BLH7	0.0082813	3.24541	up	0.000686437	5.02704	up	Associated with HOX;; Homeobox KN domain;; Homeodomain	BEL1-like homeodomain protein 7 OS=Arabidopsis thaliana OX=3702 GN=BLH7 PE=1 SV=1	unnamed protein product [Triticum turgidum subsp. durum]	molecular function: binding (GO:0005488);; biological process: biological regulation (GO:0065007)	--
AP2/ERF	Unigene_313282	ABR1	0.00249493	-3.3879	down	0.299586	-1.63393	normal	AP2 domain	Ethylene-responsive transcription factor ABR1 OS=Arabidopsis thaliana OX=3702 GN=ABR1 PE=2 SV=1	unnamed protein product [Triticum turgidum subsp. durum]	molecular function: nucleic acid binding transcription factor activity (GO:0001071);; biological process: biological regulation (GO:0065007);; cellular component: cell (GO:0005623);; cellular component: cell part (GO:0044464);; cellular component: organelle (GO:0043226);; biological process: response to stimulus (GO:0050896)	Plant hormone signal transduction (ko04075)
	Unigene_197025	EREBP1	--	--	--	2.05635e-07	7.93022	up	AP2 domain	Ethylene-responsive transcription factor 1 OS=Oryza sativa subsp. japonica OX=39947 GN=EREBP1 PE=1 SV=1	Ethylene-responsive transcription factor RAP2-3 [Hordeum vulgare]	molecular function: nucleic acid binding transcription factor activity (GO:0001071);; biological process: biological regulation (GO:0065007)	--
	Unigene_520025	EREBP1	0.0522847	3.13408	normal	0.00274041	4.51631	up	AP2 domain	Ethylene-responsive transcription factor 1 OS=Oryza sativa subsp. japonica OX=39947 GN=EREBP1 PE=1 SV=1	unnamed protein product [Triticum turgidum subsp. durum]	biological process: response to stimulus (GO:0050896);; molecular function: binding (GO:0005488);; molecular function: nucleic acid binding transcription factor activity (GO:0001071);; biological process: biological regulation (GO:0065007);; cellular component: cell (GO:0005623);; cellular component: cell part (GO:0044464);; cellular component: organelle (GO:0043226);; cellular component: membran…	MAPK signaling pathway - plant (ko04016);; Plant-pathogen interaction (ko04626)
	Unigene_191811	EREBP1	0.189266	2.09599	normal	0.00196129	4.29223	up	AP2 domain	Ethylene-responsive transcription factor 1 OS=Oryza sativa subsp. japonica OX=39947 GN=EREBP1 PE=1 SV=1	unnamed protein product [Triticum turgidum subsp. durum]	biological process: response to stimulus (GO:0050896);; molecular function: binding (GO:0005488);; molecular function: nucleic acid binding transcription factor activity (GO:0001071);; biological process: biological regulation (GO:0065007);; cellular component: cell (GO:0005623);; cellular component: cell part (GO:0044464);; cellular component: organelle (GO:0043226);; cellular component: membran…	--
	Unigene_186026	ERF008	0.0082916	-2.57201	down	0.702503	-0.800924	normal	AP2 domain	Ethylene-responsive transcription factor ERF008 OS=Arabidopsis thaliana OX=3702 GN=ERF008 PE=2 SV=1	--	biological process: response to stimulus (GO:0050896);; molecular function: nucleic acid binding transcription factor activity (GO:0001071);; biological process: biological regulation (GO:0065007)	--
	Unigene_318242	ERF013	0.00423725	1.9363	up	0.126227	1.85723	normal	AP2 domain	Ethylene-responsive transcription factor ERF013 OS=Arabidopsis thaliana OX=3702 GN=ERF013 PE=2 SV=1	ethylene-responsive transcription factor ERF014-like [Aegilops tauschii subsp. tauschii]	molecular function: binding (GO:0005488);; biological process: response to stimulus (GO:0050896);; biological process: immune system process (GO:0002376);; biological process: biological regulation (GO:0065007);; molecular function: nucleic acid binding transcription factor activity (GO:0001071);; cellular component: cell (GO:0005623);; cellular component: cell part (GO:0044464);; cellular compon…	--
	Unigene_599671	ERF013	0.00602337	3.98597	up	3.81089e-05	5.81082	up	AP2 domain	Ethylene-responsive transcription factor ERF013 OS=Arabidopsis thaliana OX=3702 GN=ERF013 PE=2 SV=1	ethylene-responsive transcription factor ERF014-like [Aegilops tauschii subsp. tauschii]	molecular function: binding (GO:0005488);; biological process: response to stimulus (GO:0050896);; biological process: immune system process (GO:0002376);; biological process: biological regulation (GO:0065007);; molecular function: nucleic acid binding transcription factor activity (GO:0001071);; cellular component: cell (GO:0005623);; cellular component: cell part (GO:0044464);; cellular compon…	--
	Unigene_515126	ERF020	0.01328	3.86212	normal	7.65784e-05	5.7459	up	AP2 domain	Ethylene-responsive transcription factor ERF020 OS=Arabidopsis thaliana OX=3702 GN=ERF020 PE=2 SV=1	hypothetical protein D1007_13819 [Hordeum vulgare]	biological process: response to stimulus (GO:0050896);; molecular function: nucleic acid binding transcription factor activity (GO:0001071);; biological process: biological regulation (GO:0065007);; cellular component: cell (GO:0005623);; cellular component: cell part (GO:0044464);; cellular component: organelle (GO:0043226);; biological process: cellular process (GO:0009987)	--
	Unigene_040928	ERF025	0.228974	2.07102	normal	0.00084327	5.0951	up	AP2 domain	Ethylene-responsive transcription factor ERF025 OS=Arabidopsis thaliana OX=3702 GN=ERF025 PE=2 SV=1	ethylene-responsive transcription factor ERF027-like [Aegilops tauschii subsp. tauschii]	molecular function: binding (GO:0005488);; molecular function: nucleic acid binding transcription factor activity (GO:0001071);; biological process: biological regulation (GO:0065007);; biological process: metabolic process (GO:0008152);; biological process: cellular process (GO:0009987);; biological process: single-organism process (GO:0044699);; biological process: response to stimulus (GO:0050…	--
	Unigene_318026	ERF025	1.72791e-05	-1.65438	down	0.525838	-1.18376	normal	AP2 domain	Ethylene-responsive transcription factor ERF025 OS=Arabidopsis thaliana OX=3702 GN=ERF025 PE=2 SV=1	ethylene-responsive transcription factor ERF027-like [Aegilops tauschii subsp. tauschii]	molecular function: binding (GO:0005488);; molecular function: nucleic acid binding transcription factor activity (GO:0001071);; biological process: biological regulation (GO:0065007);; biological process: metabolic process (GO:0008152);; biological process: cellular process (GO:0009987);; biological process: single-organism process (GO:0044699);; biological process: response to stimulus (GO:0050…	--
	Unigene_592685	ERF025	0.0785647	2.92623	normal	0.00141163	4.49805	up	AP2 domain	Ethylene-responsive transcription factor ERF025 OS=Arabidopsis thaliana OX=3702 GN=ERF025 PE=2 SV=1	hypothetical protein CFC21_024786 [Triticum aestivum]	molecular function: nucleic acid binding transcription factor activity (GO:0001071);; biological process: biological regulation (GO:0065007)	--
	Unigene_072378	ERF060	0.000155031	-1.47296	down	0.90165	0.21551	normal	AP2 domain	Ethylene-responsive transcription factor ERF060 OS=Arabidopsis thaliana OX=3702 GN=ERF060 PE=1 SV=1	DBF2 protein [Aegilops biuncialis]	molecular function: nucleic acid binding transcription factor activity (GO:0001071);; biological process: biological regulation (GO:0065007);; biological process: response to stimulus (GO:0050896)	--
	Unigene_002440	ERF109	0.0815197	2.82221	normal	2.53241e-05	6.14837	up	AP2 domain	Ethylene-responsive transcription factor ERF109 OS=Arabidopsis thaliana OX=3702 GN=ERF109 PE=1 SV=1	root abundant factor [Hordeum vulgare]	molecular function: nucleic acid binding transcription factor activity (GO:0001071);; biological process: biological regulation (GO:0065007)	--
	Unigene_311057	ERF109	0.121364	2.40398	normal	0.00153039	4.78526	up	--	Ethylene-responsive transcription factor ERF109 OS=Arabidopsis thaliana OX=3702 GN=ERF109 PE=1 SV=1	hypothetical protein CFC21_071910 [Triticum aestivum]	--	--
	Unigene_172484	ERF110	0.000307222	-2.91145	down	0.479047	-1.40824	normal	--	Ethylene-responsive transcription factor ERF110 OS=Arabidopsis thaliana OX=3702 GN=ERF110 PE=2 SV=2	ethylene-responsive transcription factor ABR1-like [Panicum miliaceum]	biological process: response to stimulus (GO:0050896);; molecular function: nucleic acid binding transcription factor activity (GO:0001071);; biological process: biological regulation (GO:0065007);; biological process: multi-organism process (GO:0051704)	Spliceosome (ko03040)
	Unigene_303347	ERF110	0.00362509	-2.99913	down	0.523549	-1.21376	normal	--	Ethylene-responsive transcription factor ERF110 OS=Arabidopsis thaliana OX=3702 GN=ERF110 PE=2 SV=2	F-box domain containing protein [Hordeum vulgare]	biological process: response to stimulus (GO:0050896);; molecular function: nucleic acid binding transcription factor activity (GO:0001071);; biological process: biological regulation (GO:0065007);; biological process: multi-organism process (GO:0051704)	Spliceosome (ko03040)
	Unigene_591623	ERF117	0.238862	1.78755	normal	0.00507739	3.92288	up	AP2 domain	Ethylene-responsive transcription factor ERF117 OS=Arabidopsis thaliana OX=3702 GN=ERF117 PE=2 SV=1	dehydration-responsive element-binding protein 2D [Brachypodium distachyon]	molecular function: nucleic acid binding transcription factor activity (GO:0001071);; biological process: biological regulation (GO:0065007)	Plant-pathogen interaction (ko04626)
	Unigene_518350	ERF2	0.0783133	2.20148	normal	0.000836551	4.40048	up	AP2 domain	Ethylene-responsive transcription factor 2 OS=Nicotiana sylvestris OX=4096 GN=ERF2 PE=2 SV=1	ethylene-responsive factor [Thinopyrum intermedium]	biological process: cellular process (GO:0009987);; biological process: signaling (GO:0023052);; biological process: single-organism process (GO:0044699);; biological process: response to stimulus (GO:0050896);; biological process: biological regulation (GO:0065007);; biological process: immune system process (GO:0002376);; molecular function: nucleic acid binding transcription factor activity (G…	Plant hormone signal transduction (ko04075)
	Unigene_175470	ERF4	0.412034	-1.3978	normal	0.00782819	-3.26063	down	AP2 domain	Ethylene-responsive transcription factor 4 OS=Arabidopsis thaliana OX=3702 GN=ERF4 PE=1 SV=1	ethylene-responsive transcription factor 3 [Agropyron mongolicum]	molecular function: nucleic acid binding transcription factor activity (GO:0001071);; biological process: biological regulation (GO:0065007)	Plant hormone signal transduction (ko04075)
	Unigene_064917	ERF4	0.0429444	3.01829	normal	0.000245309	5.17606	up	AP2 domain	Ethylene-responsive transcription factor 4 OS=Arabidopsis thaliana OX=3702 GN=ERF4 PE=1 SV=1	ethylene-responsive factor-like transcription factor ERFL2b [Hordeum vulgare]	molecular function: nucleic acid binding transcription factor activity (GO:0001071);; biological process: biological regulation (GO:0065007)	Plant hormone signal transduction (ko04075)
	Unigene_597634	ERF4	0.149051	2.45559	normal	0.00195483	4.26006	up	--	Ethylene-responsive transcription factor 4 OS=Arabidopsis thaliana OX=3702 GN=ERF4 PE=1 SV=1	ethylene-responsive transcription factor 3 [Agropyron mongolicum]	--	--
	Unigene_173246	ERF4	0.22151	1.57009	normal	0.00103013	4.61552	up	--	Ethylene-responsive transcription factor ERF109 OS=Arabidopsis thaliana OX=3702 GN=ERF109 PE=1 SV=1	ethylene-responsive transcription factor ERF109 [Brachypodium distachyon]	molecular function: nucleic acid binding transcription factor activity (GO:0001071);; biological process: biological regulation (GO:0065007);; biological process: response to stimulus (GO:0050896);; biological process: multi-organism process (GO:0051704);; biological process: developmental process (GO:0032502);; biological process: cellular process (GO:0009987);; biological process: single-organi…	--
	Unigene_583697	Os01g0693400	0.105274	2.48318	normal	0.00575544	3.80693	up	--	AP2/ERF and B3 domain-containing protein Os01g0693400 OS=Oryza sativa subsp. japonica OX=39947 GN=Os01g0693400 PE=2 SV=1	AP2/ERF and B3 domain-containing protein Os01g0693400-like [Panicum hallii]	--	--
	Unigene_603611	Os01g0693400	--	--	--	0.000814203	4.54695	up	B3 DNA binding domain	AP2/ERF and B3 domain-containing protein Os01g0693400 OS=Oryza sativa subsp. japonica OX=39947 GN=Os01g0693400 PE=2 SV=1	AP2/ERF and B3 domain-containing protein Os01g0693400 [Brachypodium distachyon]	biological process: reproduction (GO:0000003);; molecular function: binding (GO:0005488);; biological process: reproductive process (GO:0022414);; biological process: developmental process (GO:0032502);; molecular function: nucleic acid binding transcription factor activity (GO:0001071);; biological process: biological regulation (GO:0065007);; cellular component: cell (GO:0005623);; cellular com…	Plant hormone signal transduction (ko04075)
	Unigene_598209	RAP2-12	0.0725385	2.59359	normal	5.986e-05	5.88999	up	AP2 domain	Ethylene-responsive transcription factor RAP2-12 OS=Arabidopsis thaliana OX=3702 GN=RAP2-12 PE=1 SV=1	hypothetical protein CFC21_058952 [Triticum aestivum]	molecular function: nucleic acid binding transcription factor activity (GO:0001071);; biological process: biological regulation (GO:0065007)	Plant hormone signal transduction (ko04075)
	Unigene_183979	RAP2-12	0.00252865	-2.74385	down	0.529796	-1.25968	normal	AP2 domain	Ethylene-responsive transcription factor RAP2-12 OS=Arabidopsis thaliana OX=3702 GN=RAP2-12 PE=1 SV=1	ethylene-responsive transcription factor RAP2-12-like [Aegilops tauschii subsp. tauschii]	molecular function: nucleic acid binding transcription factor activity (GO:0001071);; biological process: biological regulation (GO:0065007)	Plant hormone signal transduction (ko04075)
	Unigene_007600	RAP2-12	0.0559642	2.81007	normal	9.57462e-05	5.68732	up	AP2 domain	Ethylene-responsive transcription factor RAP2-12 OS=Arabidopsis thaliana OX=3702 GN=RAP2-12 PE=1 SV=1	Ethylene-responsive transcription factor RAP2-3 [Hordeum vulgare]	molecular function: nucleic acid binding transcription factor activity (GO:0001071);; biological process: biological regulation (GO:0065007)	--
	Unigene_008513	RAP2-12	0.332678	1.23551	normal	0.000445704	4.99963	up	AP2 domain	Ethylene-responsive transcription factor RAP2-12 OS=Arabidopsis thaliana OX=3702 GN=RAP2-12 PE=1 SV=1	Ethylene-responsive transcription factor RAP2-3 [Hordeum vulgare]	molecular function: nucleic acid binding transcription factor activity (GO:0001071);; biological process: biological regulation (GO:0065007)	Plant hormone signal transduction (ko04075)
	Unigene_027321	RAP2-13	0.0202004	1.7184	normal	0.000888627	3.8716	up	AP2 domain	Ethylene-responsive transcription factor RAP2-13 OS=Arabidopsis thaliana OX=3702 GN=RAP2-13 PE=1 SV=1	predicted protein [Hordeum vulgare subsp. vulgare]	molecular function: nucleic acid binding transcription factor activity (GO:0001071);; biological process: biological regulation (GO:0065007)	--
	Unigene_316762	RAP2-9	0.00671684	-2.74153	down	0.889942	-0.32269	normal	AP2 domain	Ethylene-responsive transcription factor RAP2-9 OS=Arabidopsis thaliana OX=3702 GN=RAP2-9 PE=2 SV=1	predicted protein [Hordeum vulgare subsp. vulgare]	biological process: response to stimulus (GO:0050896);; molecular function: nucleic acid binding transcription factor activity (GO:0001071);; biological process: biological regulation (GO:0065007)	--
NAC	Unigene_510943	NAC048	--	--	--	2.07598e-07	7.8399	up	No apical meristem (NAM) protein	NAC domain-containing protein 48 OS=Oryza sativa subsp. japonica OX=39947 GN=NAC048 PE=1 SV=1	stress-related NAM transcription factor, partial [Elymus repens]	biological process: biological regulation (GO:0065007);; molecular function: binding (GO:0005488);; cellular component: cell (GO:0005623);; cellular component: cell part (GO:0044464);; cellular component: organelle (GO:0043226);; biological process: response to stimulus (GO:0050896);; biological process: multicellular organismal process (GO:0032501);; biological process: developmental process (GO…	--
	Unigene_521812	NAC053	0.058772	2.659	normal	0.000583156	4.63136	up	--	NAC domain-containing protein 53 OS=Arabidopsis thaliana OX=3702 GN=NAC053 PE=2 SV=1	NAC domain-containing protein NTL5-like protein [Triticum aestivum]	biological process: response to stimulus (GO:0050896);; molecular function: binding (GO:0005488);; molecular function: nucleic acid binding transcription factor activity (GO:0001071);; biological process: biological regulation (GO:0065007);; cellular component: cell (GO:0005623);; cellular component: cell part (GO:0044464);; cellular component: organelle (GO:0043226);; biological process: multice…	--
	Unigene_500184	NAC071	--	--	--	0.000202711	4.90942	up	No apical meristem (NAM) protein	NAC domain-containing protein 71 OS=Oryza sativa subsp. japonica OX=39947 GN=NAC071 PE=1 SV=1	unnamed protein product [Triticum turgidum subsp. durum]	biological process: reproduction (GO:0000003);; biological process: response to stimulus (GO:0050896);; biological process: reproductive process (GO:0022414);; biological process: developmental process (GO:0032502);; molecular function: binding (GO:0005488);; molecular function: nucleic acid binding transcription factor activity (GO:0001071);; biological process: biological regulation (GO:0065007…	--
	Unigene_594453	NAC074	0.0339797	3.26033	normal	0.00489105	4.21118	up	No apical meristem (NAM) protein	NAC domain-containing protein 74 OS=Oryza sativa subsp. japonica OX=39947 GN=NAC074 PE=2 SV=1	--	molecular function: binding (GO:0005488);; biological process: biological regulation (GO:0065007)	--
	Unigene_528168	NAC078	0.0647847	2.58303	normal	0.00310029	3.9892	up	No apical meristem (NAM) protein	NAC domain-containing protein 78 OS=Arabidopsis thaliana OX=3702 GN=NAC078 PE=2 SV=2	NAC domain-containing protein 78 [Brachypodium distachyon]	biological process: response to stimulus (GO:0050896);; molecular function: binding (GO:0005488);; molecular function: nucleic acid binding transcription factor activity (GO:0001071);; biological process: biological regulation (GO:0065007);; cellular component: cell (GO:0005623);; cellular component: cell part (GO:0044464);; cellular component: organelle (GO:0043226);; biological process: multice…	--
	Unigene_520465	NAC100	0.00720334	-2.79938	down	0.362424	-1.35064	normal	No apical meristem (NAM) protein;; No apical meristem (NAM) protein	NAC domain-containing protein 100 OS=Arabidopsis thaliana OX=3702 GN=NAC100 PE=2 SV=1	hypothetical protein BRADI_4g34157v3 [Brachypodium distachyon]	molecular function: binding (GO:0005488);; biological process: biological regulation (GO:0065007)	--
HSF	Unigene_065003	HSFA3	2.64605e-10	-2.77254	down	0.15183	-1.73441	normal	--	Heat stress transcription factor A-3 OS=Oryza sativa subsp. japonica OX=39947 GN=HSFA3 PE=2 SV=1	heat stress transcription factor A-3 isoform X3 [Brachypodium distachyon]	molecular function: binding (GO:0005488);; molecular function: nucleic acid binding transcription factor activity (GO:0001071);; biological process: biological regulation (GO:0065007);; cellular component: cell (GO:0005623);; cellular component: cell part (GO:0044464);; cellular component: organelle (GO:0043226);; biological process: response to stimulus (GO:0050896)	--
	Unigene_613804	HSFA3	0.00213231	-2.76303	down	0.170058	-1.47511	normal	--	Heat stress transcription factor A-3 OS=Oryza sativa subsp. japonica OX=39947 GN=HSFA3 PE=2 SV=1	heat shock factor A3, partial [Hordeum vulgare subsp. vulgare]	molecular function: binding (GO:0005488);; molecular function: nucleic acid binding transcription factor activity (GO:0001071);; biological process: biological regulation (GO:0065007);; cellular component: cell (GO:0005623);; cellular component: cell part (GO:0044464);; cellular component: organelle (GO:0043226);; biological process: response to stimulus (GO:0050896)	--
	Unigene_014580	HSFA2E	0.00277398	-1.29796	down	0.966352	-0.113326	normal	HSF-type DNA-binding	Heat stress transcription factor A-2e OS=Oryza sativa subsp. japonica OX=39947 GN=HSFA2E PE=2 SV=1	hypothetical protein CFC21_073970 [Triticum aestivum]	molecular function: nucleic acid binding transcription factor activity (GO:0001071);; biological process: biological regulation (GO:0065007);; cellular component: cell (GO:0005623);; cellular component: organelle (GO:0043226);; cellular component: cell part (GO:0044464);; biological process: response to stimulus (GO:0050896);; molecular function: binding (GO:0005488)	--
	Unigene_316153	HSFA4B	0.00937287	-1.64223	down	0.493547	-1.24844	normal	--	Heat stress transcription factor A-4b OS=Oryza sativa subsp. japonica OX=39947 GN=HSFA4B PE=2 SV=1	heat stress transcription factor A-4b [Brachypodium distachyon]	--	--
	Unigene_317960	HSFA5	0.00914988	-1.81445	down	0.4754	-1.21701	normal	--	Heat stress transcription factor A-5 OS=Oryza sativa subsp. japonica OX=39947 GN=HSFA5 PE=2 SV=1	heat stress transcription factor A-5 [Brachypodium distachyon]	molecular function: nucleic acid binding transcription factor activity (GO:0001071);; biological process: biological regulation (GO:0065007)	--
	Unigene_529449	HSFB1	0.0629988	3.05752	normal	0.00119778	5.04475	up	--	Heat stress transcription factor B-1 OS=Oryza sativa subsp. japonica OX=39947 GN=HSFB1 PE=2 SV=1	heat stress transcription factor B-1-like [Aegilops tauschii subsp. tauschii]	molecular function: nucleic acid binding transcription factor activity (GO:0001071);; biological process: biological regulation (GO:0065007);; cellular component: cell (GO:0005623);; cellular component: cell part (GO:0044464);; cellular component: organelle (GO:0043226);; biological process: response to stimulus (GO:0050896)	--
	Unigene_023022	HSFC1B	3.62406e-06	-3.05471	down	0.125341	-2.03834	normal	HSF-type DNA-binding	Heat stress transcription factor C-1b OS=Oryza sativa subsp. japonica OX=39947 GN=HSFC1B PE=2 SV=1	heat shock factor C1b [Triticum aestivum]	biological process: response to stimulus (GO:0050896);; molecular function: nucleic acid binding transcription factor activity (GO:0001071);; biological process: biological regulation (GO:0065007);; cellular component: cell (GO:0005623);; cellular component: cell part (GO:0044464);; cellular component: organelle (GO:0043226);; molecular function: binding (GO:0005488)	--
C2H2	Unigene_029871	IDD7	0.0179711	1.84421	normal	0.00921592	2.97889	up	Zinc finger, C2H2 type	Protein indeterminate-domain 7 OS=Arabidopsis thaliana OX=3702 GN=IDD7 PE=2 SV=1	unnamed protein product [Triticum turgidum subsp. durum]	molecular function: binding (GO:0005488)	Galactose metabolism (ko00052);; Other glycan degradation (ko00511);; Glycosaminoglycan degradation (ko00531);; Sphingolipid metabolism (ko00600);; Glycosphingolipid biosynthesis - ganglio series (ko00604)
	Unigene_521896	ZFP1	0.0494809	3.14307	normal	0.00332377	4.23784	up	C2H2-type zinc finger;; C2H2-type zinc finger	Zinc finger protein 1 OS=Triticum aestivum OX=4565 PE=2 SV=1	zinc finger protein 1 [Aegilops tauschii subsp. tauschii]	--	--
	Unigene_504899	ZFP36	0.00227757	3.77213	up	2.59844e-05	5.11436	up	C2H2-type zinc finger;; C2H2-type zinc finger;; Zinc-finger double-stranded RNA-binding	Zinc finger protein 36 OS=Oryza sativa subsp. japonica OX=39947 GN=ZFP36 PE=2 SV=1	hypothetical protein OsJ_11395 [Oryza sativa Japonica Group]	biological process: response to stimulus (GO:0050896);; cellular component: cell (GO:0005623);; cellular component: cell part (GO:0044464);; cellular component: organelle (GO:0043226)	--
	Unigene_519951	ZFP36	--	--	--	7.10338e-06	6.72098	up	C2H2-type zinc finger;; Zinc-finger of C2H2 type	Zinc finger protein 36 OS=Oryza sativa subsp. japonica OX=39947 GN=ZFP36 PE=2 SV=1	Zinc finger protein 1 [Hordeum vulgare]	--	--

## Sheet: Stems
TF familiy	ID	Gene name	S0_vs_S3_DESeq2_FDR	S0_vs_S3_DESeq2_log2FC	S0_vs_S3_regulated	S0_vs_S6_DESeq2_FDR	S0_vs_S6_DESeq2_log2FC	S0_vs_S6_regulated	Pfam_annotation	Swissprot_annotation	nr_annotation	GO_second_level_annotation	KEGG_pathway_annotation
bHLH	Unigene_593070	bHLH041	0.00317372	-3.43069	down	0.0116315	-3.07007	normal	Helix-loop-helix DNA-binding domain	Putative transcription factor bHLH041 OS=Arabidopsis thaliana OX=3702 GN=BHLH41 PE=3 SV=1	unnamed protein product [Triticum turgidum subsp. durum]	molecular function: nucleic acid binding transcription factor activity (GO:0001071);; biological process: biological regulation (GO:0065007);; biological process: response to stimulus (GO:0050896);; molecular function: binding (GO:0005488)	MAPK signaling pathway - plant (ko04016);; Plant hormone signal transduction (ko04075)
	Unigene_060296	bHLH111	0.000278635	3.92474	up	0.00862119	2.90009	up	--	Transcription factor bHLH111 OS=Arabidopsis thaliana OX=3702 GN=BHLH111 PE=2 SV=1	hypothetical protein PAHAL_2G369700 [Panicum hallii]	molecular function: binding (GO:0005488);; molecular function: nucleic acid binding transcription factor activity (GO:0001071);; biological process: biological regulation (GO:0065007);; biological process: metabolic process (GO:0008152);; biological process: cellular process (GO:0009987);; cellular component: cell (GO:0005623);; cellular component: cell part (GO:0044464);; cellular component: org…	--
	Unigene_323386	bHLH130	7.87925e-05	5.85515	up	0.00996691	4.33929	up	Helix-loop-helix DNA-binding domain	Transcription factor bHLH130 OS=Arabidopsis thaliana OX=3702 GN=BHLH130 PE=1 SV=1	unnamed protein product [Triticum turgidum subsp. durum]	molecular function: binding (GO:0005488)	Plant-pathogen interaction (ko04626)
	Unigene_198633	bHLH140	0.00773061	3.39883	up	--	--	--	Scavenger mRNA decapping enzyme C-term binding;; HIT domain;; Macro domain;; C2HE / C2H2 / C2HC zinc-binding finger	Transcription factor bHLH140 OS=Arabidopsis thaliana OX=3702 GN=BHLH140 PE=3 SV=1	transcription factor bHLH140 [Aegilops tauschii subsp. tauschii]	molecular function: catalytic activity (GO:0003824);; biological process: metabolic process (GO:0008152);; biological process: cellular process (GO:0009987);; biological process: single-organism process (GO:0044699)	--
	Unigene_075368	bHLH140	--	--	--	3.51298e-07	6.49202	up	Scavenger mRNA decapping enzyme C-term binding;; HIT domain;; AAA domain;; Macro domain;; C2HE / C2H2 / C2HC zinc-binding finger	Transcription factor bHLH140 OS=Arabidopsis thaliana OX=3702 GN=BHLH140 PE=3 SV=1	unnamed protein product [Triticum turgidum subsp. durum]	molecular function: catalytic activity (GO:0003824);; biological process: metabolic process (GO:0008152);; biological process: cellular process (GO:0009987);; biological process: single-organism process (GO:0044699)	--
	Unigene_055917	BHLH148	2.73533e-12	-7.20044	down	0.00167212	-4.2783	down	Helix-loop-helix DNA-binding domain	Transcription factor BHLH148 OS=Oryza sativa subsp. japonica OX=39947 GN=BHLH148 PE=1 SV=1	bHLH92a [Leymus chinensis]	biological process: response to stimulus (GO:0050896);; molecular function: nucleic acid binding transcription factor activity (GO:0001071);; biological process: biological regulation (GO:0065007);; cellular component: cell (GO:0005623);; cellular component: cell part (GO:0044464);; cellular component: organelle (GO:0043226);; molecular function: binding (GO:0005488)	--
	Unigene_065414	BHLH148	--	--	--	3.58557e-05	5.17729	up	Helix-loop-helix DNA-binding domain	Transcription factor BHLH148 OS=Oryza sativa subsp. japonica OX=39947 GN=BHLH148 PE=1 SV=1	bHLH92 [Triticum aestivum]	biological process: response to stimulus (GO:0050896);; molecular function: nucleic acid binding transcription factor activity (GO:0001071);; biological process: biological regulation (GO:0065007);; cellular component: cell (GO:0005623);; cellular component: cell part (GO:0044464);; cellular component: organelle (GO:0043226);; molecular function: binding (GO:0005488)	--
	Unigene_004461	bHLH149	--	--	--	1.1377e-05	5.28652	up	--	Transcription factor bHLH149 OS=Arabidopsis thaliana OX=3702 GN=BHLH149 PE=1 SV=1	hypothetical protein BRADI_2g08540v3 [Brachypodium distachyon]	--	--
	Unigene_516423	bHLH25	0.000289497	-4.0262	down	1.81622e-05	-4.38182	down	Helix-loop-helix DNA-binding domain	Transcription factor bHLH25 OS=Arabidopsis thaliana OX=3702 GN=BHLH25 PE=2 SV=2	hypothetical protein CFC21_056521 [Triticum aestivum]	molecular function: nucleic acid binding transcription factor activity (GO:0001071);; biological process: biological regulation (GO:0065007);; molecular function: binding (GO:0005488)	MAPK signaling pathway - plant (ko04016);; Plant hormone signal transduction (ko04075)
	Unigene_179411	bHLH35	4.36844e-05	-4.47764	down	5.83597e-09	-4.8507	down	Helix-loop-helix DNA-binding domain	Transcription factor bHLH35 OS=Arabidopsis thaliana OX=3702 GN=BHLH35 PE=2 SV=1	bHLH27 [Triticum aestivum]	molecular function: nucleic acid binding transcription factor activity (GO:0001071);; biological process: biological regulation (GO:0065007);; molecular function: binding (GO:0005488)	MAPK signaling pathway - plant (ko04016);; Plant hormone signal transduction (ko04075)
	Unigene_189089	bHLH35	4.51378e-12	-9.33677	down	0.000944619	-4.07913	down	Helix-loop-helix DNA-binding domain	Transcription factor bHLH35 OS=Arabidopsis thaliana OX=3702 GN=BHLH35 PE=2 SV=1	unnamed protein product [Triticum turgidum subsp. durum]	molecular function: nucleic acid binding transcription factor activity (GO:0001071);; biological process: biological regulation (GO:0065007);; molecular function: binding (GO:0005488)	MAPK signaling pathway - plant (ko04016);; Plant hormone signal transduction (ko04075)
	Unigene_526140	bHLH35	2.41999e-12	-8.16475	down	4.28752e-08	-7.07931	down	Helix-loop-helix DNA-binding domain	Transcription factor bHLH35 OS=Arabidopsis thaliana OX=3702 GN=BHLH35 PE=2 SV=1	unnamed protein product [Triticum turgidum subsp. durum]	molecular function: nucleic acid binding transcription factor activity (GO:0001071);; biological process: biological regulation (GO:0065007);; molecular function: binding (GO:0005488)	MAPK signaling pathway - plant (ko04016);; Plant hormone signal transduction (ko04075)
	Unigene_596158	bHLH35	3.38446e-10	-6.95432	down	0.0122158	-3.48171	normal	Helix-loop-helix DNA-binding domain	Transcription factor bHLH35 OS=Arabidopsis thaliana OX=3702 GN=BHLH35 PE=2 SV=1	unnamed protein product [Triticum turgidum subsp. durum]	molecular function: nucleic acid binding transcription factor activity (GO:0001071);; biological process: biological regulation (GO:0065007);; molecular function: binding (GO:0005488)	MAPK signaling pathway - plant (ko04016);; Plant hormone signal transduction (ko04075)
	Unigene_312732	bHLH49	--	--	--	2.33601e-07	7.44087	up	Helix-loop-helix DNA-binding domain	Transcription factor bHLH49 OS=Arabidopsis thaliana OX=3702 GN=BHLH49 PE=1 SV=1	Transcription factor bHLH49 [Hordeum vulgare]	molecular function: binding (GO:0005488);; molecular function: nucleic acid binding transcription factor activity (GO:0001071);; biological process: biological regulation (GO:0065007);; biological process: response to stimulus (GO:0050896)	Plant-pathogen interaction (ko04626)
	Unigene_320733	bHLH49	--	--	--	3.56268e-08	8.4112	up	Helix-loop-helix DNA-binding domain	Transcription factor bHLH49 OS=Arabidopsis thaliana OX=3702 GN=BHLH49 PE=1 SV=1	Transcription factor bHLH49 [Hordeum vulgare]	molecular function: binding (GO:0005488)	Plant-pathogen interaction (ko04626)
	Unigene_321851	bHLH62	--	--	--	6.86847e-09	10.1228	up	Helix-loop-helix DNA-binding domain	Transcription factor bHLH62 OS=Arabidopsis thaliana OX=3702 GN=BHLH62 PE=2 SV=1	transcription factor bHLH77 isoform X2 [Brachypodium distachyon]	molecular function: binding (GO:0005488)	Plant-pathogen interaction (ko04626)
	Unigene_603423	bHLH62	0.000329491	4.60186	up	0.0119395	3.49039	normal	Helix-loop-helix DNA-binding domain	Transcription factor bHLH62 OS=Arabidopsis thaliana OX=3702 GN=BHLH62 PE=2 SV=1	hypothetical protein CFC21_108999 [Triticum aestivum]	molecular function: binding (GO:0005488)	Plant-pathogen interaction (ko04626)
	Unigene_012663	bHLH68	0.000120459	4.00072	up	0.00103227	3.35501	up	--	Transcription factor bHLH68 OS=Arabidopsis thaliana OX=3702 GN=BHLH68 PE=1 SV=2	hypothetical protein CFC21_001375 [Triticum aestivum]	--	--
	Unigene_058391	bHLH68	--	--	--	4.67452e-07	7.80135	up	--	Transcription factor bHLH68 OS=Arabidopsis thaliana OX=3702 GN=BHLH68 PE=1 SV=2	hypothetical protein CFC21_001375 [Triticum aestivum]	--	--
	Unigene_005991	bHLH93	0.0032106	4.25636	up	0.0359105	3.03686	normal	Helix-loop-helix DNA-binding domain	Transcription factor bHLH93 OS=Arabidopsis thaliana OX=3702 GN=BHLH93 PE=1 SV=1	predicted protein [Hordeum vulgare subsp. vulgare]	molecular function: binding (GO:0005488)	Pentose and glucuronate interconversions (ko00040);; Ascorbate and aldarate metabolism (ko00053);; Amino sugar and nucleotide sugar metabolism (ko00520)
WRKY	Unigene_184338	WRKY24	--	--	--	2.89309e-05	6.54216	up	WRKY DNA -binding domain	WRKY transcription factor WRKY24 OS=Oryza sativa subsp. indica OX=39946 GN=WRKY24 PE=2 SV=1	--	molecular function: binding (GO:0005488);; biological process: response to stimulus (GO:0050896);; molecular function: nucleic acid binding transcription factor activity (GO:0001071);; biological process: biological regulation (GO:0065007);; cellular component: cell (GO:0005623);; cellular component: cell part (GO:0044464);; cellular component: organelle (GO:0043226);; biological process: metabol…	MAPK signaling pathway - plant (ko04016);; Plant-pathogen interaction (ko04626)
	Unigene_512589	WRKY24	0.0008544	-3.87082	down	0.0465227	-3.51048	normal	WRKY DNA -binding domain	WRKY transcription factor WRKY24 OS=Oryza sativa subsp. indica OX=39946 GN=WRKY24 PE=2 SV=1	WRKY protein, partial [Avena sativa]	molecular function: binding (GO:0005488);; biological process: response to stimulus (GO:0050896);; molecular function: nucleic acid binding transcription factor activity (GO:0001071);; biological process: biological regulation (GO:0065007);; cellular component: cell (GO:0005623);; cellular component: cell part (GO:0044464);; cellular component: organelle (GO:0043226);; biological process: metabol…	MAPK signaling pathway - plant (ko04016);; Plant-pathogen interaction (ko04626)
	Unigene_602942	WRKY24	0.00241227	4.77555	up	1.57392e-06	5.91681	up	WRKY DNA -binding domain	WRKY transcription factor WRKY24 OS=Oryza sativa subsp. indica OX=39946 GN=WRKY24 PE=2 SV=1	WRKY protein, partial [Avena sativa]	molecular function: binding (GO:0005488);; biological process: response to stimulus (GO:0050896);; molecular function: nucleic acid binding transcription factor activity (GO:0001071);; biological process: biological regulation (GO:0065007);; cellular component: cell (GO:0005623);; cellular component: cell part (GO:0044464);; cellular component: organelle (GO:0043226);; biological process: metabol…	MAPK signaling pathway - plant (ko04016);; Plant-pathogen interaction (ko04626)
	Unigene_066205	WRKY28	0.000172541	-5.37076	down	0.00160508	-4.08848	down	WRKY DNA -binding domain	WRKY transcription factor WRKY28 OS=Oryza sativa subsp. japonica OX=39947 GN=WRKY28 PE=2 SV=2	unnamed protein product [Triticum turgidum subsp. durum]	biological process: biological regulation (GO:0065007);; molecular function: nucleic acid binding transcription factor activity (GO:0001071);; cellular component: cell (GO:0005623);; cellular component: cell part (GO:0044464);; cellular component: organelle (GO:0043226);; biological process: response to stimulus (GO:0050896);; biological process: multi-organism process (GO:0051704);; molecular fu…	Plant-pathogen interaction (ko04626)
	Unigene_516744	WRKY28	6.94458e-12	-8.24558	down	6.7785e-05	-5.72586	down	WRKY DNA -binding domain	WRKY transcription factor WRKY28 OS=Oryza sativa subsp. japonica OX=39947 GN=WRKY28 PE=2 SV=2	WRKY23 [Hordeum vulgare]	biological process: biological regulation (GO:0065007);; molecular function: nucleic acid binding transcription factor activity (GO:0001071);; cellular component: cell (GO:0005623);; cellular component: cell part (GO:0044464);; cellular component: organelle (GO:0043226);; biological process: response to stimulus (GO:0050896);; biological process: multi-organism process (GO:0051704);; molecular fu…	Plant-pathogen interaction (ko04626)
	Unigene_179711	WRKY38	1.02072e-13	-8.85483	down	3.53035e-09	-6.74367	down	WRKY DNA -binding domain	Probable WRKY transcription factor 38 OS=Arabidopsis thaliana OX=3702 GN=WRKY38 PE=1 SV=1	hypothetical protein CFC21_070984 [Triticum aestivum]	molecular function: nucleic acid binding transcription factor activity (GO:0001071);; biological process: biological regulation (GO:0065007);; molecular function: binding (GO:0005488)	Plant-pathogen interaction (ko04626)
	Unigene_185931	WRKY38	--	--	--	6.5038e-06	6.44493	up	WRKY DNA -binding domain	Probable WRKY transcription factor 38 OS=Arabidopsis thaliana OX=3702 GN=WRKY38 PE=1 SV=1	--	molecular function: nucleic acid binding transcription factor activity (GO:0001071);; biological process: biological regulation (GO:0065007);; molecular function: binding (GO:0005488)	Plant-pathogen interaction (ko04626)
	Unigene_518241	WRKY41	4.43273e-09	-5.62076	down	8.47446e-05	-4.57036	down	WRKY DNA -binding domain;; WRKY DNA -binding domain	Probable WRKY transcription factor 41 OS=Arabidopsis thaliana OX=3702 GN=WRKY41 PE=1 SV=2	drought resistance protein [Agropyron mongolicum]	biological process: response to stimulus (GO:0050896);; biological process: immune system process (GO:0002376);; molecular function: binding (GO:0005488);; molecular function: nucleic acid binding transcription factor activity (GO:0001071);; biological process: biological regulation (GO:0065007);; cellular component: cell (GO:0005623);; cellular component: cell part (GO:0044464);; cellular compon…	--
	Unigene_035890	WRKY41	1.46937e-05	-4.20634	down	3.78131e-05	-3.42535	down	WRKY DNA -binding domain;; WRKY DNA -binding domain	Probable WRKY transcription factor 41 OS=Arabidopsis thaliana OX=3702 GN=WRKY41 PE=1 SV=2	predicted protein, partial [Hordeum vulgare subsp. vulgare]	biological process: response to stimulus (GO:0050896);; biological process: immune system process (GO:0002376);; molecular function: binding (GO:0005488);; molecular function: nucleic acid binding transcription factor activity (GO:0001071);; biological process: biological regulation (GO:0065007);; cellular component: cell (GO:0005623);; cellular component: cell part (GO:0044464);; cellular compon…	--
	Unigene_074037	WRKY41	0.00264838	-3.34609	down	0.00140418	-3.36829	down	Leucine rich repeat;; Leucine Rich repeats (2 copies);; Leucine Rich Repeat;; Leucine rich repeat N-terminal domain;; WRKY DNA -binding domain	Probable WRKY transcription factor 41 OS=Arabidopsis thaliana OX=3702 GN=WRKY41 PE=1 SV=2	predicted protein, partial [Hordeum vulgare subsp. vulgare]	molecular function: nucleic acid binding transcription factor activity (GO:0001071);; biological process: biological regulation (GO:0065007);; molecular function: binding (GO:0005488)	Plant-pathogen interaction (ko04626)
	Unigene_196170	WRKY41	0.000131048	-3.72278	down	0.000140954	-3.24156	down	WRKY DNA -binding domain	Probable WRKY transcription factor 41 OS=Arabidopsis thaliana OX=3702 GN=WRKY41 PE=1 SV=2	predicted protein, partial [Hordeum vulgare subsp. vulgare]	biological process: response to stimulus (GO:0050896);; biological process: immune system process (GO:0002376);; molecular function: binding (GO:0005488);; molecular function: nucleic acid binding transcription factor activity (GO:0001071);; biological process: biological regulation (GO:0065007);; cellular component: cell (GO:0005623);; cellular component: cell part (GO:0044464);; cellular compon…	Plant-pathogen interaction (ko04626)
	Unigene_072875	WRKY46	0.000231901	4.43955	up	0.00820386	3.28021	up	WRKY DNA -binding domain	WRKY transcription factor SUSIBA2 OS=Hordeum vulgare OX=4513 GN=WRKY46 PE=1 SV=1	drought resistance protein [Agropyron mongolicum]	biological process: response to stimulus (GO:0050896);; molecular function: binding (GO:0005488);; molecular function: nucleic acid binding transcription factor activity (GO:0001071);; biological process: biological regulation (GO:0065007)	--
	Unigene_509435	WRKY50	8.9781e-07	-6.02857	down	0.00367107	-4.16703	down	WRKY DNA -binding domain	Probable WRKY transcription factor 50 OS=Arabidopsis thaliana OX=3702 GN=WRKY50 PE=2 SV=1	WRKY1 [Lolium perenne]	molecular function: nucleic acid binding transcription factor activity (GO:0001071);; biological process: biological regulation (GO:0065007);; molecular function: binding (GO:0005488)	MAPK signaling pathway - plant (ko04016);; Plant-pathogen interaction (ko04626)
	Unigene_512259	WRKY51	4.87701e-05	-4.82869	down	0.0491795	-3.00587	normal	WRKY DNA -binding domain;; WRKY DNA -binding domain	Probable WRKY transcription factor 51 OS=Arabidopsis thaliana OX=3702 GN=WRKY51 PE=1 SV=1	WRKY transcription factor 19 [Hordeum vulgare]	molecular function: nucleic acid binding transcription factor activity (GO:0001071);; biological process: biological regulation (GO:0065007);; molecular function: binding (GO:0005488)	Plant-pathogen interaction (ko04626)
	Unigene_513209	WRKY51	0.00224529	-3.56758	down	4.6874e-07	-4.50961	down	WRKY DNA -binding domain;; Plant zinc cluster domain	WRKY transcription factor WRKY51 OS=Oryza sativa subsp. japonica OX=39947 GN=WRKY51 PE=1 SV=1	hypothetical protein CFC21_023484 [Triticum aestivum]	biological process: response to stimulus (GO:0050896);; molecular function: binding (GO:0005488);; molecular function: nucleic acid binding transcription factor activity (GO:0001071);; biological process: biological regulation (GO:0065007)	MAPK signaling pathway - plant (ko04016);; Plant-pathogen interaction (ko04626)
	Unigene_173279	WRKY53	2.88553e-08	-6.68786	down	1.66624e-07	-4.9553	down	WRKY DNA -binding domain	Probable WRKY transcription factor 53 OS=Arabidopsis thaliana OX=3702 GN=WRKY53 PE=1 SV=1	drought resistance protein [Agropyron mongolicum]	biological process: response to stimulus (GO:0050896);; biological process: immune system process (GO:0002376);; molecular function: binding (GO:0005488);; molecular function: nucleic acid binding transcription factor activity (GO:0001071);; biological process: biological regulation (GO:0065007);; cellular component: cell (GO:0005623);; cellular component: cell part (GO:0044464);; cellular compon…	Plant-pathogen interaction (ko04626)
	Unigene_512381	WRKY53	0.000593657	-4.20777	down	0.00245583	-4.13101	down	WRKY DNA -binding domain	Probable WRKY transcription factor 53 OS=Arabidopsis thaliana OX=3702 GN=WRKY53 PE=1 SV=1	predicted protein, partial [Hordeum vulgare subsp. vulgare]	biological process: response to stimulus (GO:0050896);; biological process: immune system process (GO:0002376);; molecular function: binding (GO:0005488);; molecular function: nucleic acid binding transcription factor activity (GO:0001071);; biological process: biological regulation (GO:0065007);; cellular component: cell (GO:0005623);; cellular component: cell part (GO:0044464);; cellular compon…	Plant-pathogen interaction (ko04626)
	Unigene_185049	WRKY55	0.000735823	-4.62581	down	3.69291e-08	-6.04036	down	WRKY DNA -binding domain	WRKY transcription factor 55 OS=Arabidopsis thaliana OX=3702 GN=WRKY55 PE=2 SV=1	--	molecular function: nucleic acid binding transcription factor activity (GO:0001071);; biological process: biological regulation (GO:0065007);; molecular function: binding (GO:0005488)	Plant-pathogen interaction (ko04626)
	Unigene_053214	WRKY62	2.35164e-05	-7.81901	down	0.000476049	-4.75832	down	--	WRKY transcription factor WRKY62 OS=Oryza sativa subsp. indica OX=39946 GN=WRKY62 PE=1 SV=1	hypothetical protein CFC21_077794 [Triticum aestivum]	biological process: response to stimulus (GO:0050896);; biological process: biological regulation (GO:0065007);; cellular component: cell (GO:0005623);; cellular component: cell part (GO:0044464);; cellular component: organelle (GO:0043226);; biological process: multi-organism process (GO:0051704)	--
	Unigene_521035	WRKY65	0.156133	-1.8543	normal	0.00501213	-3.38261	down	WRKY DNA -binding domain	Probable WRKY transcription factor 65 OS=Arabidopsis thaliana OX=3702 GN=WRKY65 PE=2 SV=1	predicted protein, partial [Hordeum vulgare subsp. vulgare]	molecular function: nucleic acid binding transcription factor activity (GO:0001071);; biological process: biological regulation (GO:0065007);; molecular function: binding (GO:0005488)	MAPK signaling pathway - plant (ko04016);; Plant-pathogen interaction (ko04626)
	Unigene_512949	WRKY70	3.79395e-06	-6.00265	down	0.000945857	-4.32002	down	WRKY DNA -binding domain	WRKY DNA-binding transcription factor 70 OS=Solanum lycopersicum OX=4081 GN=WRKY70 PE=2 SV=1	WRKY transcription factor 146 [Triticum aestivum]	biological process: response to stimulus (GO:0050896);; biological process: immune system process (GO:0002376);; biological process: biological regulation (GO:0065007);; molecular function: nucleic acid binding transcription factor activity (GO:0001071);; biological process: cellular process (GO:0009987);; biological process: signaling (GO:0023052);; biological process: single-organism process (G…	Plant-pathogen interaction (ko04626)
	Unigene_065706	WRKY71	3.93732e-07	-5.83025	down	0.0051715	-4.31786	down	WRKY DNA -binding domain	WRKY transcription factor WRKY71 OS=Oryza sativa subsp. indica OX=39946 GN=WRKY71 PE=1 SV=1	WRKY4 transcription factor, partial [Stipa purpurea]	molecular function: nucleic acid binding transcription factor activity (GO:0001071);; biological process: biological regulation (GO:0065007);; molecular function: binding (GO:0005488)	Plant-pathogen interaction (ko04626)
	Unigene_187802	WRKY71	3.52567e-05	-4.02547	down	1.94228e-07	-3.7496	down	WRKY DNA -binding domain	WRKY transcription factor WRKY71 OS=Oryza sativa subsp. indica OX=39946 GN=WRKY71 PE=1 SV=1	WRKY4 transcription factor, partial [Stipa purpurea]	molecular function: nucleic acid binding transcription factor activity (GO:0001071);; biological process: biological regulation (GO:0065007);; molecular function: binding (GO:0005488)	MAPK signaling pathway - plant (ko04016);; Plant-pathogen interaction (ko04626)
	Unigene_513485	WRKY71	0.000785933	-4.15544	down	4.41373e-08	-5.32256	down	WRKY DNA -binding domain	WRKY transcription factor 71 OS=Arabidopsis thaliana OX=3702 GN=WRKY71 PE=2 SV=1	hypothetical protein CFC21_014025 [Triticum aestivum]	molecular function: nucleic acid binding transcription factor activity (GO:0001071);; biological process: biological regulation (GO:0065007);; molecular function: binding (GO:0005488)	Spliceosome (ko03040)
	Unigene_519748	WRKY72A	2.42986e-07	-7.45528	down	4.31427e-09	-9.43407	down	WRKY DNA -binding domain	WRKY transcription factor 72A OS=Solanum lycopersicum OX=4081 GN=WRKY72A PE=2 SV=1	putative WRKY transcription factor 72 [Hordeum vulgare]	molecular function: nucleic acid binding transcription factor activity (GO:0001071);; biological process: biological regulation (GO:0065007);; biological process: response to stimulus (GO:0050896);; molecular function: binding (GO:0005488)	Plant-pathogen interaction (ko04626)
bZIP	Unigene_321735	BZIP1-A	0.000429348	4.72333	up	0.00458576	3.72592	up	G-box binding protein MFMR;; Disordered region downstream of MFMR;; bZIP transcription factor;; Basic region leucine zipper	bZIP transcription factor 1-A OS=Triticum aestivum OX=4565 GN=BZIP1-A PE=2 SV=1	bZIP transcription factor 16-like isoform X1 [Aegilops tauschii subsp. tauschii]	molecular function: nucleic acid binding transcription factor activity (GO:0001071);; biological process: biological regulation (GO:0065007)	--
	Unigene_318911	TRAB1	0.00199806	3.75863	up	0.027696	2.43704	normal	bZIP transcription factor;; Basic region leucine zipper	bZIP transcription factor TRAB1 OS=Oryza sativa subsp. japonica OX=39947 GN=TRAB1 PE=1 SV=2	unnamed protein product [Triticum turgidum subsp. durum]	molecular function: binding (GO:0005488);; biological process: response to stimulus (GO:0050896);; molecular function: nucleic acid binding transcription factor activity (GO:0001071);; biological process: biological regulation (GO:0065007);; cellular component: cell (GO:0005623);; cellular component: cell part (GO:0044464);; cellular component: organelle (GO:0043226);; biological process: cellula…	Plant hormone signal transduction (ko04075)
	Unigene_325431	TGA10	0.00373382	3.76895	up	0.019448	3.06046	normal	Seed dormancy control;; bZIP transcription factor;; Basic region leucine zipper;; Abhydrolase domain containing 18;; alpha/beta hydrolase fold	bZIP transcription factor TGA10 OS=Nicotiana tabacum OX=4097 GN=TGA10 PE=1 SV=1	transcription factor TGAL9-like isoform X1 [Aegilops tauschii subsp. tauschii]	molecular function: nucleic acid binding transcription factor activity (GO:0001071);; biological process: biological regulation (GO:0065007);; biological process: metabolic process (GO:0008152);; biological process: cellular process (GO:0009987);; molecular function: binding (GO:0005488)	Plant hormone signal transduction (ko04075)
	Unigene_317067	BZIP12	--	--	--	3.28583e-08	9.68218	up	bZIP transcription factor;; Basic region leucine zipper	bZIP transcription factor 12 OS=Oryza sativa subsp. japonica OX=39947 GN=BZIP12 PE=2 SV=1	hypothetical protein CFC21_007546 [Triticum aestivum]	molecular function: nucleic acid binding transcription factor activity (GO:0001071);; biological process: biological regulation (GO:0065007)	Plant hormone signal transduction (ko04075)
	Unigene_032491	BZIP23	0.000867398	3.87058	up	0.026322	2.44972	normal	bZIP transcription factor;; Basic region leucine zipper;; bZIP Maf transcription factor	bZIP transcription factor 23 OS=Oryza sativa subsp. japonica OX=39947 GN=BZIP23 PE=2 SV=1	bZIP transcription factor 46 [Brachypodium distachyon]	molecular function: binding (GO:0005488);; biological process: response to stimulus (GO:0050896);; molecular function: nucleic acid binding transcription factor activity (GO:0001071);; biological process: biological regulation (GO:0065007);; cellular component: cell (GO:0005623);; cellular component: cell part (GO:0044464);; cellular component: organelle (GO:0043226);; biological process: cellula…	Plant hormone signal transduction (ko04075)
	Unigene_314880	BZIP50	--	--	--	0.00049388	5.67793	up	bZIP transcription factor;; Basic region leucine zipper	bZIP transcription factor 50 OS=Oryza sativa subsp. japonica OX=39947 GN=BZIP50 PE=2 SV=1	bZIP transcription factor 50 [Brachypodium distachyon]	molecular function: nucleic acid binding transcription factor activity (GO:0001071);; biological process: biological regulation (GO:0065007);; cellular component: cell (GO:0005623);; cellular component: cell part (GO:0044464);; cellular component: organelle (GO:0043226);; cellular component: membrane (GO:0016020);; cellular component: organelle part (GO:0044422);; cellular component: membrane par…	--
	Unigene_069938	BZIP50	0.00953526	3.29327	up	0.0235266	3.17659	normal	bZIP transcription factor;; Basic region leucine zipper	bZIP transcription factor 50 OS=Oryza sativa subsp. japonica OX=39947 GN=BZIP50 PE=2 SV=1	bZIP transcription factor 50 [Brachypodium distachyon]	molecular function: nucleic acid binding transcription factor activity (GO:0001071);; biological process: biological regulation (GO:0065007);; cellular component: cell (GO:0005623);; cellular component: cell part (GO:0044464);; cellular component: organelle (GO:0043226);; cellular component: membrane (GO:0016020);; cellular component: organelle part (GO:0044422);; cellular component: membrane par…	--
	Unigene_520927	BZIP53	1.14416e-09	10.2862	up	2.56672e-07	9.0047	up	bZIP transcription factor;; Basic region leucine zipper	bZIP transcription factor 53 OS=Arabidopsis thaliana OX=3702 GN=BZIP53 PE=1 SV=1	hypothetical protein CFC21_000809 [Triticum aestivum]	molecular function: nucleic acid binding transcription factor activity (GO:0001071);; biological process: biological regulation (GO:0065007)	--
MYB	Unigene_005962	MYB61	--	--	--	3.07333e-05	5.87401	up	Myb-like DNA-binding domain;; Myb-like DNA-binding domain;; Myb-like DNA-binding domain	Transcription factor MYB61 OS=Arabidopsis thaliana OX=3702 GN=MYB61 PE=2 SV=1	hypothetical protein BRADI_2g11080v3 [Brachypodium distachyon]	--	Plant-pathogen interaction (ko04626)
	Unigene_180708	LIMYB	0.000667879	-4.01987	down	1.20327e-07	-5.13822	down	Myb/SANT-like DNA-binding domain	L10-interacting MYB domain-containing protein OS=Arabidopsis thaliana OX=3702 GN=LIMYB PE=1 SV=1	hypothetical protein PAHAL_5G240700 [Panicum hallii]	--	Plant-pathogen interaction (ko04626)
	Unigene_318599	MYB3R-2	5.36093e-05	4.39056	up	0.0107646	2.46973	normal	Myb-like DNA-binding domain;; Myb-like DNA-binding domain	Transcription factor MYB3R-2 OS=Oryza sativa subsp. japonica OX=39947 GN=MYB3R-2 PE=2 SV=1	hypothetical protein CFC21_042871 [Triticum aestivum]	--	--
	Unigene_320949	MYB3R-2	0.00663198	3.02856	up	0.0453739	2.03959	normal	Myb-like DNA-binding domain;; Myb-like DNA-binding domain	Transcription factor MYB3R-2 OS=Oryza sativa subsp. japonica OX=39947 GN=MYB3R-2 PE=2 SV=1	unnamed protein product [Triticum turgidum subsp. durum]	--	--
	Unigene_023619	MYB4	0.00242386	4.06273	up	0.0141315	3.35967	normal	Myb-like DNA-binding domain;; Myb-like DNA-binding domain	Transcription repressor MYB4 OS=Arabidopsis thaliana OX=3702 GN=MYB4 PE=1 SV=1	hypothetical protein CFC21_103097 [Triticum aestivum]	--	--
	Unigene_070690	MYB4	--	--	--	1.18949e-10	8.71685	up	Myb-like DNA-binding domain;; Myb-like DNA-binding domain	Transcription factor MYB4 OS=Oryza sativa subsp. japonica OX=39947 GN=MYB4 PE=2 SV=2	transcription factor MYB4 [Brachypodium distachyon]	--	--
	Unigene_311990	MYB4	--	--	--	1.75484e-05	7.83209	up	--	Transcription factor MYB4 OS=Oryza sativa subsp. japonica OX=39947 GN=MYB4 PE=2 SV=2	MYB-related protein [Triticum aestivum]	--	--
	Unigene_073691	MYB44	--	--	--	2.18104e-06	7.00685	up	Myb-like DNA-binding domain;; Myb-like DNA-binding domain	Transcription factor MYB44 OS=Arabidopsis thaliana OX=3702 GN=MYB44 PE=1 SV=1	transcription factor MYB44-like [Aegilops tauschii subsp. tauschii]	--	--
	Unigene_193544	MYBS3	0.00149718	4.04306	up	0.0247851	3.01941	normal	Myb-like DNA-binding domain	Transcription factor MYBS3 OS=Oryza sativa subsp. japonica OX=39947 GN=MYBS3 PE=2 SV=1	transcription factor MybS3 [Hordeum vulgare]	biological process: response to stimulus (GO:0050896);; molecular function: nucleic acid binding transcription factor activity (GO:0001071);; biological process: biological regulation (GO:0065007);; cellular component: cell (GO:0005623);; cellular component: cell part (GO:0044464);; cellular component: organelle (GO:0043226)	--
	Unigene_066675	PHL7	--	--	--	1.69208e-06	7.57776	up	MYB-CC type transfactor, LHEQLE motif;; Myb-like DNA-binding domain	Myb family transcription factor PHL7 OS=Arabidopsis thaliana OX=3702 GN=PHL7 PE=2 SV=1	predicted protein, partial [Hordeum vulgare subsp. vulgare]	--	--
	Unigene_071539	PHL7	0.000125007	4.59933	up	0.0368472	2.75137	normal	MYB-CC type transfactor, LHEQLE motif	Myb family transcription factor PHL7 OS=Arabidopsis thaliana OX=3702 GN=PHL7 PE=2 SV=1	hypothetical protein DAI22_08g163700 [Oryza sativa Japonica Group]	molecular function: nucleic acid binding transcription factor activity (GO:0001071);; biological process: biological regulation (GO:0065007);; cellular component: cell (GO:0005623);; cellular component: cell part (GO:0044464);; cellular component: organelle (GO:0043226);; biological process: developmental process (GO:0032502)	Plant hormone signal transduction (ko04075)
	Unigene_309286	MYBAS2	3.94853e-05	5.06416	up	0.000493403	4.41696	up	Myb-like DNA-binding domain;; Myb-like DNA-binding domain;; Myb-like DNA-binding domain	Myb-related protein MYBAS2 OS=Oryza sativa subsp. japonica OX=39947 GN=MYBAS2 PE=2 SV=1	unnamed protein product [Triticum turgidum subsp. durum]	--	--
BEL1	Unigene_178872	BLH1	3.73846e-06	5.33196	up	0.000911688	4.34556	up	Homeobox KN domain;; Homeodomain	BEL1-like homeodomain protein 1 OS=Arabidopsis thaliana OX=3702 GN=BLH1 PE=1 SV=1	unnamed protein product [Triticum turgidum subsp. durum]	biological process: cellular process (GO:0009987);; biological process: cellular component organization or biogenesis (GO:0071840);; biological process: response to stimulus (GO:0050896);; molecular function: binding (GO:0005488);; molecular function: nucleic acid binding transcription factor activity (GO:0001071);; biological process: biological regulation (GO:0065007);; cellular component: cell…	--
	Unigene_188978	BLH1	--	--	--	1.47827e-07	9.29892	up	Homeobox KN domain;; Homeodomain	BEL1-like homeodomain protein 1 OS=Arabidopsis thaliana OX=3702 GN=BLH1 PE=1 SV=1	hypothetical protein CFC21_068964 [Triticum aestivum]	molecular function: binding (GO:0005488);; molecular function: nucleic acid binding transcription factor activity (GO:0001071);; biological process: biological regulation (GO:0065007);; cellular component: cell (GO:0005623);; cellular component: cell part (GO:0044464);; cellular component: organelle (GO:0043226);; cellular component: cell junction (GO:0030054);; cellular component: symplast (GO:0…	--
	Unigene_606105	BLH1	8.85159e-11	9.26593	up	7.87733e-10	8.65875	up	Associated with HOX;; Homeobox KN domain;; Homeodomain	BEL1-like homeodomain protein 1 OS=Arabidopsis thaliana OX=3702 GN=BLH1 PE=1 SV=1	BEL1-like homeodomain protein 1 [Aegilops tauschii subsp. tauschii]	biological process: cellular process (GO:0009987);; biological process: cellular component organization or biogenesis (GO:0071840);; biological process: response to stimulus (GO:0050896);; molecular function: binding (GO:0005488);; molecular function: nucleic acid binding transcription factor activity (GO:0001071);; biological process: biological regulation (GO:0065007);; cellular component: cell…	--
	Unigene_019883	BLH7	0.0002109	4.12982	up	0.00737417	3.27407	up	Associated with HOX;; Homeobox KN domain;; Homeodomain	BEL1-like homeodomain protein 7 OS=Arabidopsis thaliana OX=3702 GN=BLH7 PE=1 SV=1	unnamed protein product [Triticum turgidum subsp. durum]	molecular function: binding (GO:0005488);; biological process: biological regulation (GO:0065007)	--
	Unigene_071536	BLH7	--	--	--	3.00514e-09	10.2356	up	Associated with HOX	BEL1-like homeodomain protein 7 OS=Arabidopsis thaliana OX=3702 GN=BLH7 PE=1 SV=1	hypothetical protein CFC21_058756 [Triticum aestivum]	--	--
	Unigene_313871	BLH7	--	--	--	3.86796e-09	10.2449	up	Associated with HOX;; Homeobox KN domain;; Homeodomain	BEL1-like homeodomain protein 7 OS=Arabidopsis thaliana OX=3702 GN=BLH7 PE=1 SV=1	BEL1-like homeodomain protein 7 [Aegilops tauschii subsp. tauschii]	molecular function: binding (GO:0005488);; biological process: biological regulation (GO:0065007)	--
	Unigene_325162	BLH7	1.8701e-06	6.47598	up	3.09562e-05	5.52996	up	Associated with HOX;; Homeobox KN domain;; Homeodomain	BEL1-like homeodomain protein 7 OS=Arabidopsis thaliana OX=3702 GN=BLH7 PE=1 SV=1	hypothetical protein CFC21_062846 [Triticum aestivum]	molecular function: binding (GO:0005488);; biological process: biological regulation (GO:0065007)	--
	Unigene_600623	BLH7	0.000574891	3.57963	up	0.00676314	3.09331	up	Associated with HOX	BEL1-like homeodomain protein 7 OS=Arabidopsis thaliana OX=3702 GN=BLH7 PE=1 SV=1	hypothetical protein CFC21_062846 [Triticum aestivum]	--	--
AP2/ERF	Unigene_197025	EREBP1	0.00150278	-4.20123	down	0.154173	-2.3452	normal	AP2 domain	Ethylene-responsive transcription factor 1 OS=Oryza sativa subsp. japonica OX=39947 GN=EREBP1 PE=1 SV=1	Ethylene-responsive transcription factor RAP2-3 [Hordeum vulgare]	molecular function: nucleic acid binding transcription factor activity (GO:0001071);; biological process: biological regulation (GO:0065007)	Plant-pathogen interaction (ko04626)
	Unigene_316002	EREBP1	0.000356972	4.25345	up	0.000786793	3.02242	up	--	Ethylene-responsive transcription factor 1 OS=Oryza sativa subsp. japonica OX=39947 GN=EREBP1 PE=1 SV=1	unnamed protein product [Triticum turgidum subsp. durum]	molecular function: nucleic acid binding transcription factor activity (GO:0001071);; biological process: biological regulation (GO:0065007)	Plant-pathogen interaction (ko04626)
	Unigene_599671	ERF013	0.00683034	-3.85478	down	0.715355	0.762779	normal	AP2 domain	Ethylene-responsive transcription factor ERF013 OS=Arabidopsis thaliana OX=3702 GN=ERF013 PE=2 SV=1	ethylene-responsive transcription factor ERF014-like [Aegilops tauschii subsp. tauschii]	molecular function: binding (GO:0005488);; biological process: response to stimulus (GO:0050896);; biological process: immune system process (GO:0002376);; biological process: biological regulation (GO:0065007);; molecular function: nucleic acid binding transcription factor activity (GO:0001071);; cellular component: cell (GO:0005623);; cellular component: cell part (GO:0044464);; cellular compon…	Plant-pathogen interaction (ko04626)
	Unigene_515126	ERF020	6.68246e-06	-6.89993	down	1.27109e-07	-8.20722	down	AP2 domain	Ethylene-responsive transcription factor ERF020 OS=Arabidopsis thaliana OX=3702 GN=ERF020 PE=2 SV=1	hypothetical protein D1007_13819 [Hordeum vulgare]	biological process: response to stimulus (GO:0050896);; molecular function: nucleic acid binding transcription factor activity (GO:0001071);; biological process: biological regulation (GO:0065007);; cellular component: cell (GO:0005623);; cellular component: cell part (GO:0044464);; cellular component: organelle (GO:0043226);; biological process: cellular process (GO:0009987)	Plant hormone signal transduction (ko04075)
	Unigene_040928	ERF025	8.38945e-10	-7.73748	down	0.0059768	-3.64933	down	AP2 domain	Ethylene-responsive transcription factor ERF025 OS=Arabidopsis thaliana OX=3702 GN=ERF025 PE=2 SV=1	ethylene-responsive transcription factor ERF027-like [Aegilops tauschii subsp. tauschii]	molecular function: binding (GO:0005488);; molecular function: nucleic acid binding transcription factor activity (GO:0001071);; biological process: biological regulation (GO:0065007);; biological process: metabolic process (GO:0008152);; biological process: cellular process (GO:0009987);; biological process: single-organism process (GO:0044699);; biological process: response to stimulus (GO:0050…	--
	Unigene_592685	ERF025	6.9085e-07	-5.94002	down	0.0819055	-2.07316	normal	AP2 domain	Ethylene-responsive transcription factor ERF025 OS=Arabidopsis thaliana OX=3702 GN=ERF025 PE=2 SV=1	hypothetical protein CFC21_024786 [Triticum aestivum]	molecular function: nucleic acid binding transcription factor activity (GO:0001071);; biological process: biological regulation (GO:0065007)	Plant hormone signal transduction (ko04075)
	Unigene_185468	ERF053	--	--	--	6.47239e-05	4.77315	up	AP2 domain	Ethylene-responsive transcription factor ERF053 OS=Arabidopsis thaliana OX=3702 GN=ERF053 PE=1 SV=1	--	molecular function: nucleic acid binding transcription factor activity (GO:0001071);; biological process: biological regulation (GO:0065007)	--
	Unigene_501422	ERF073	0.00832258	-3.34313	down	0.199443	-1.86882	normal	AP2 domain	Ethylene-responsive transcription factor ERF073 OS=Arabidopsis thaliana OX=3702 GN=ERF073 PE=1 SV=1	hypothetical protein CFC21_050838 [Triticum aestivum]	--	--
	Unigene_002440	ERF109	1.21907e-06	-5.76046	down	0.00400234	-3.73344	down	AP2 domain	Ethylene-responsive transcription factor ERF109 OS=Arabidopsis thaliana OX=3702 GN=ERF109 PE=1 SV=1	root abundant factor [Hordeum vulgare]	molecular function: nucleic acid binding transcription factor activity (GO:0001071);; biological process: biological regulation (GO:0065007)	--
	Unigene_173246	ERF109	0.00019272	-5.17222	down	7.02628e-05	-4.08704	down	--	Ethylene-responsive transcription factor ERF109 OS=Arabidopsis thaliana OX=3702 GN=ERF109 PE=1 SV=1	ethylene-responsive transcription factor ERF109 [Brachypodium distachyon]	molecular function: nucleic acid binding transcription factor activity (GO:0001071);; biological process: biological regulation (GO:0065007);; biological process: response to stimulus (GO:0050896);; biological process: multi-organism process (GO:0051704);; biological process: developmental process (GO:0032502);; biological process: cellular process (GO:0009987);; biological process: single-organi…	Plant hormone signal transduction (ko04075)
	Unigene_593227	ERF110	7.72223e-08	-7.03508	down	0.228386	-2.14478	normal	AP2 domain	Ethylene-responsive transcription factor ERF110 OS=Arabidopsis thaliana OX=3702 GN=ERF110 PE=2 SV=2	ethylene-responsive transcription factor ERF109-like [Aegilops tauschii subsp. tauschii]	molecular function: nucleic acid binding transcription factor activity (GO:0001071);; biological process: biological regulation (GO:0065007)	--
	Unigene_037808	ERF1A	8.0991e-05	-4.72512	down	0.283171	-1.51108	normal	AP2 domain	Ethylene-responsive transcription factor 1A OS=Arabidopsis thaliana OX=3702 GN=ERF1A PE=1 SV=2	ethylene-responsive transcription factor 1-like [Hordeum vulgare]	biological process: cellular process (GO:0009987);; biological process: signaling (GO:0023052);; biological process: single-organism process (GO:0044699);; biological process: response to stimulus (GO:0050896);; biological process: biological regulation (GO:0065007);; biological process: immune system process (GO:0002376);; molecular function: nucleic acid binding transcription factor activity (G…	--
	Unigene_518350	ERF2	6.03697e-06	-5.04974	down	7.75136e-05	-3.87811	down	AP2 domain	Ethylene-responsive transcription factor 2 OS=Nicotiana sylvestris OX=4096 GN=ERF2 PE=2 SV=1	ethylene-responsive factor [Thinopyrum intermedium]	biological process: cellular process (GO:0009987);; biological process: signaling (GO:0023052);; biological process: single-organism process (GO:0044699);; biological process: response to stimulus (GO:0050896);; biological process: biological regulation (GO:0065007);; biological process: immune system process (GO:0002376);; molecular function: nucleic acid binding transcription factor activity (G…	--
	Unigene_603633	ERF2	0.00702457	-4.41135	down	0.849986	-0.387941	normal	AP2 domain	Ethylene-responsive transcription factor 2 OS=Nicotiana sylvestris OX=4096 GN=ERF2 PE=2 SV=1	pathogen-inducible transcription factor ERF3 [Triticum aestivum]	biological process: cellular process (GO:0009987);; biological process: signaling (GO:0023052);; biological process: single-organism process (GO:0044699);; biological process: response to stimulus (GO:0050896);; biological process: biological regulation (GO:0065007);; biological process: immune system process (GO:0002376);; molecular function: nucleic acid binding transcription factor activity (G…	--
	Unigene_514995	ERF3	3.6433e-05	-5.4469	down	0.00722895	-4.20528	down	AP2 domain	Ethylene-responsive transcription factor 3 OS=Nicotiana tabacum OX=4097 GN=ERF3 PE=2 SV=1	ethylene-responsive transcription factor 3-like [Aegilops tauschii subsp. tauschii]	molecular function: nucleic acid binding transcription factor activity (GO:0001071);; biological process: biological regulation (GO:0065007)	--
	Unigene_597634	ERF4	0.00529487	-3.46884	down	0.138671	-2.62304	normal	--	Ethylene-responsive transcription factor 4 OS=Arabidopsis thaliana OX=3702 GN=ERF4 PE=1 SV=1	ethylene-responsive transcription factor 3 [Agropyron mongolicum]	--	--
	Unigene_322958	ERF4	0.0034256	3.95841	up	0.0417143	2.40403	normal	AP2 domain	Ethylene-responsive transcription factor 4 OS=Nicotiana sylvestris OX=4096 GN=ERF4 PE=2 SV=1	--	molecular function: nucleic acid binding transcription factor activity (GO:0001071);; biological process: biological regulation (GO:0065007)	Plant hormone signal transduction (ko04075)
	Unigene_064917	ERF4	0.000315783	-3.9302	down	0.0133391	-2.87444	normal	AP2 domain	Ethylene-responsive transcription factor 4 OS=Arabidopsis thaliana OX=3702 GN=ERF4 PE=1 SV=1	ethylene-responsive factor-like transcription factor ERFL2b [Hordeum vulgare]	molecular function: nucleic acid binding transcription factor activity (GO:0001071);; biological process: biological regulation (GO:0065007)	Plant hormone signal transduction (ko04075)
	Unigene_593418	ERF4	0.000310589	-4.8985	down	0.175271	-1.83654	normal	AP2 domain	Ethylene-responsive transcription factor 4 OS=Nicotiana tabacum OX=4097 GN=ERF4 PE=1 SV=1	ethylene-responsive transcription factor 4 [Setaria italica]	molecular function: nucleic acid binding transcription factor activity (GO:0001071);; biological process: biological regulation (GO:0065007)	--
	Unigene_598818	ERF9	0.00390535	-2.9785	down	0.829496	-0.313587	normal	AP2 domain	Ethylene-responsive transcription factor 9 OS=Arabidopsis thaliana OX=3702 GN=ERF9 PE=1 SV=1	ethylene-responsive transcription factor 4-like [Panicum miliaceum]	molecular function: nucleic acid binding transcription factor activity (GO:0001071);; biological process: biological regulation (GO:0065007)	--
	Unigene_008513	RAP2-12	0.00237079	-3.3075	down	0.00272687	-3.28005	down	AP2 domain	Ethylene-responsive transcription factor RAP2-12 OS=Arabidopsis thaliana OX=3702 GN=RAP2-12 PE=1 SV=1	Ethylene-responsive transcription factor RAP2-3 [Hordeum vulgare]	molecular function: nucleic acid binding transcription factor activity (GO:0001071);; biological process: biological regulation (GO:0065007)	--
	Unigene_305746	RAP2-4	0.00982485	3.66898	up	--	--	--	--	Ethylene-responsive transcription factor RAP2-4 OS=Arabidopsis thaliana OX=3702 GN=RAP2-4 PE=1 SV=1	DREB2 [Triticum aestivum]	--	--
	Unigene_321341	RAP2-4	--	--	--	1.62999e-07	8.17133	up	AP2 domain	Ethylene-responsive transcription factor RAP2-4 OS=Arabidopsis thaliana OX=3702 GN=RAP2-4 PE=1 SV=1	DBF2 protein [Aegilops biuncialis]	molecular function: nucleic acid binding transcription factor activity (GO:0001071);; biological process: biological regulation (GO:0065007);; biological process: response to stimulus (GO:0050896)	--
	Unigene_508300	RAP2-4	0.000595898	-3.54612	down	0.0542451	-1.98983	normal	AP2 domain	Ethylene-responsive transcription factor RAP2-4 OS=Arabidopsis thaliana OX=3702 GN=RAP2-4 PE=1 SV=1	hypothetical protein CFC21_096812 [Triticum aestivum]	biological process: cellular process (GO:0009987);; biological process: signaling (GO:0023052);; biological process: single-organism process (GO:0044699);; biological process: response to stimulus (GO:0050896);; biological process: biological regulation (GO:0065007);; molecular function: binding (GO:0005488);; molecular function: nucleic acid binding transcription factor activity (GO:0001071);; c…	--
NAC	Unigene_196256	NAC002	--	--	--	4.67454e-07	7.18365	up	No apical meristem (NAM) protein	NAC domain-containing protein 2 OS=Oryza sativa subsp. japonica OX=39947 GN=NAC002 PE=1 SV=1	NAC transcription factor [Avena sativa]	molecular function: binding (GO:0005488);; biological process: biological regulation (GO:0065007)	--
	Unigene_600600	NAC002	0.00207466	-3.6061	down	0.00449746	-2.5781	down	No apical meristem (NAM) protein	NAC domain-containing protein 2 OS=Oryza sativa subsp. japonica OX=39947 GN=NAC002 PE=1 SV=1	NAC transcription factor [Avena sativa]	molecular function: binding (GO:0005488);; biological process: biological regulation (GO:0065007)	--
HSF	Unigene_197060	HSFA1	0.00199181	3.32252	up	0.0311631	2.43955	normal	HSF-type DNA-binding	Heat stress transcription factor A-1 OS=Oryza sativa subsp. japonica OX=39947 GN=HSFA1 PE=2 SV=1	hypothetical protein BRADI_1g01130v3 [Brachypodium distachyon]	molecular function: nucleic acid binding transcription factor activity (GO:0001071);; biological process: biological regulation (GO:0065007);; cellular component: cell (GO:0005623);; cellular component: organelle (GO:0043226);; cellular component: cell part (GO:0044464);; molecular function: binding (GO:0005488)	--
	Unigene_318302	HSFC2A	1.733e-08	8.14783	up	3.64245e-05	6.17987	up	Remorin, C-terminal region	Heat stress transcription factor C-2a OS=Oryza sativa subsp. japonica OX=39947 GN=HSFC2A PE=2 SV=1	uncharacterized protein LOC100834817 [Brachypodium distachyon]	--	--
	Unigene_522559	HSFA2A	0.00012931	-4.76181	down	0.023894	-3.52912	normal	HSF-type DNA-binding	Heat stress transcription factor A-2a OS=Oryza sativa subsp. japonica OX=39947 GN=HSFA2A PE=2 SV=1	predicted protein, partial [Hordeum vulgare subsp. vulgare]	molecular function: nucleic acid binding transcription factor activity (GO:0001071);; biological process: biological regulation (GO:0065007);; cellular component: cell (GO:0005623);; cellular component: organelle (GO:0043226);; cellular component: cell part (GO:0044464);; biological process: response to stimulus (GO:0050896);; molecular function: binding (GO:0005488)	--
	Unigene_190096	HSFA2C	--	--	--	3.32264e-09	9.38407	up	--	Heat stress transcription factor A-2c OS=Oryza sativa subsp. japonica OX=39947 GN=HSFA2C PE=1 SV=2	heat stress transcription factor A2c [Lolium arundinaceum]	molecular function: nucleic acid binding transcription factor activity (GO:0001071);; biological process: biological regulation (GO:0065007);; molecular function: binding (GO:0005488);; biological process: response to stimulus (GO:0050896)	--
	Unigene_176440	HSFB2B	--	--	--	1.09045e-06	6.78589	up	--	Heat stress transcription factor B-2b OS=Oryza sativa subsp. japonica OX=39947 GN=HSFB2B PE=2 SV=1	hypothetical protein CFC21_102711 [Triticum aestivum]	--	--
	Unigene_023022	HSFC1B	4.68244e-05	5.61541	up	--	--	--	HSF-type DNA-binding	Heat stress transcription factor C-1b OS=Oryza sativa subsp. japonica OX=39947 GN=HSFC1B PE=2 SV=1	heat shock factor C1b [Triticum aestivum]	biological process: response to stimulus (GO:0050896);; molecular function: nucleic acid binding transcription factor activity (GO:0001071);; biological process: biological regulation (GO:0065007);; cellular component: cell (GO:0005623);; cellular component: cell part (GO:0044464);; cellular component: organelle (GO:0043226);; molecular function: binding (GO:0005488)	--
	Unigene_511802	HSFA4D	2.3876e-07	-5.94988	down	0.0199246	-3.32961	normal	--	Heat stress transcription factor A-4d OS=Oryza sativa subsp. japonica OX=39947 GN=HSFA4D PE=1 SV=1	LOW QUALITY PROTEIN: heat stress transcription factor A-4d-like [Brachypodium distachyon]	--	--
	Unigene_014580	HSFA2E	--	--	--	1.16966e-06	7.43203	up	HSF-type DNA-binding	Heat stress transcription factor A-2e OS=Oryza sativa subsp. japonica OX=39947 GN=HSFA2E PE=2 SV=1	hypothetical protein CFC21_073970 [Triticum aestivum]	molecular function: nucleic acid binding transcription factor activity (GO:0001071);; biological process: biological regulation (GO:0065007);; cellular component: cell (GO:0005623);; cellular component: organelle (GO:0043226);; cellular component: cell part (GO:0044464);; biological process: response to stimulus (GO:0050896);; molecular function: binding (GO:0005488)	--
C2C2-Dof	Unigene_051094	DOF1	0.0065101	3.39425	up	0.0305025	2.46073	normal	Dof domain, zinc finger	Dof zinc finger protein 1 OS=Oryza sativa subsp. japonica OX=39947 GN=DOF1 PE=2 SV=1	unnamed protein product [Triticum turgidum subsp. durum]	molecular function: binding (GO:0005488);; biological process: biological regulation (GO:0065007)	--
	Unigene_195608	DOF1	0.00270994	3.68179	up	0.0176945	2.93907	normal	Dof domain, zinc finger	Dof zinc finger protein 1 OS=Oryza sativa subsp. japonica OX=39947 GN=DOF1 PE=2 SV=1	hypothetical protein CFC21_018363 [Triticum aestivum]	molecular function: binding (GO:0005488);; molecular function: nucleic acid binding transcription factor activity (GO:0001071);; biological process: biological regulation (GO:0065007)	--
	Unigene_323741	DOF2	0.0026393	3.90427	up	0.00958718	2.97505	up	Dof domain, zinc finger	Dof zinc finger protein 2 OS=Oryza sativa subsp. japonica OX=39947 GN=DOF2 PE=2 SV=1	unnamed protein product [Triticum turgidum subsp. durum]	molecular function: binding (GO:0005488);; molecular function: nucleic acid binding transcription factor activity (GO:0001071);; biological process: biological regulation (GO:0065007)	--
	Unigene_044674	DOF4	0.00488086	3.895	up	0.0233567	3.55642	normal	Dof domain, zinc finger	Dof zinc finger protein 4 OS=Oryza sativa subsp. japonica OX=39947 GN=DOF4 PE=2 SV=1	dof zinc finger protein 8 [Hordeum vulgare]	molecular function: binding (GO:0005488);; molecular function: nucleic acid binding transcription factor activity (GO:0001071);; biological process: biological regulation (GO:0065007)	--
C2H2	Unigene_521896	ZFP1	0.000502078	-4.17826	down	3.44859e-07	-6.5731	down	C2H2-type zinc finger;; C2H2-type zinc finger	Zinc finger protein 1 OS=Triticum aestivum OX=4565 PE=2 SV=1	zinc finger protein 1 [Aegilops tauschii subsp. tauschii]	--	--
	Unigene_603075	ZFP1	0.000383397	-4.28794	down	0.149535	-2.36852	normal	C2H2-type zinc finger;; C2H2-type zinc finger	Zinc finger protein 1 OS=Triticum aestivum OX=4565 PE=2 SV=1	hypothetical protein CFC21_067802 [Triticum aestivum]	--	--
	Unigene_052716	ZFP1	--	--	--	1.18747e-07	6.66153	up	C2H2-type zinc finger;; C2H2-type zinc finger	Zinc finger protein 1 OS=Triticum aestivum OX=4565 PE=2 SV=1	zinc finger protein 1 [Aegilops tauschii subsp. tauschii]	--	--
	Unigene_504899	ZFP36	3.3153e-08	-9.39758	down	0.00227416	-4.29506	down	C2H2-type zinc finger;; C2H2-type zinc finger;; Zinc-finger double-stranded RNA-binding	Zinc finger protein 36 OS=Oryza sativa subsp. japonica OX=39947 GN=ZFP36 PE=2 SV=1	hypothetical protein OsJ_11395 [Oryza sativa Japonica Group]	biological process: response to stimulus (GO:0050896);; cellular component: cell (GO:0005623);; cellular component: cell part (GO:0044464);; cellular component: organelle (GO:0043226)	--

## Sheet: Leaves
TF familiy	ID	Gene name	L0_vs_L3_DESeq2_FDR	L0_vs_L3_DESeq2_log2FC	L0_vs_L3_regulated	L0_vs_L2_DESeq2_FDR	L0_vs_L6_DESeq2_log2FC	L0_vs_L6_regulated	Pfam_annotation	Swissprot_annotation	nr_annotation	GO_second_level_annotation	KEGG_pathway_annotation
bHLH	Unigene_529108	bHLH130	0.00649842	-2.38656	down	1.27e-05	-5.15214	down	Helix-loop-helix DNA-binding domain	Transcription factor bHLH130 OS=Arabidopsis thaliana OX=3702 GN=BHLH130 PE=1 SV=1	unnamed protein product [Triticum turgidum subsp. durum]	molecular function: binding (GO:0005488)	Plant-pathogen interaction (ko04626)
	Unigene_065414	BHLH148	0.00139931	-2.95746	down	6.35e-05	-3.19897	down	Helix-loop-helix DNA-binding domain	Transcription factor BHLH148 OS=Oryza sativa subsp. japonica OX=39947 GN=BHLH148 PE=1 SV=1	bHLH92 [Triticum aestivum]	biological process: response to stimulus (GO:0050896);; molecular function: nucleic acid binding transcription factor activity (GO:0001071);; biological process: biological regulation (GO:0065007);; cellular component: cell (GO:0005623);; cellular component: cell part (GO:0044464);; cellular component: organelle (GO:0043226);; molecular function: binding (GO:0005488)	--
	Unigene_179467	bHLH153	1.91e-09	4.93271	up	2.45e-20	6.79745	up	--	Transcription factor bHLH153 OS=Arabidopsis thaliana OX=3702 GN=BHLH153 PE=1 SV=1	hypothetical protein BRADI_5g14260v3 [Brachypodium distachyon]	molecular function: binding (GO:0005488);; molecular function: nucleic acid binding transcription factor activity (GO:0001071);; biological process: biological regulation (GO:0065007);; biological process: response to stimulus (GO:0050896);; biological process: metabolic process (GO:0008152);; biological process: cellular process (GO:0009987);; cellular component: cell (GO:0005623);; cellular com…	--
	Unigene_519090	bHLH153	0.000331985	3.83525	up	--	--	--	--	Transcription factor bHLH153 OS=Arabidopsis thaliana OX=3702 GN=BHLH153 PE=1 SV=1	hypothetical protein CFC21_024282 [Triticum aestivum]	molecular function: binding (GO:0005488);; molecular function: nucleic acid binding transcription factor activity (GO:0001071);; biological process: biological regulation (GO:0065007);; biological process: response to stimulus (GO:0050896);; biological process: metabolic process (GO:0008152);; biological process: cellular process (GO:0009987);; cellular component: cell (GO:0005623);; cellular com…	--
	Unigene_521396	bHLH30	0.0056559	-3.0271	down	0.0081162	-3.4838	down	Helix-loop-helix DNA-binding domain	Transcription factor bHLH30 OS=Arabidopsis thaliana OX=3702 GN=BHLH30 PE=1 SV=1	hypothetical protein CFC21_034691 [Triticum aestivum]	molecular function: binding (GO:0005488)	--
	Unigene_069541	bHLH34	0.0474838	2.53296	normal	0.00442753	4.04721	up	--	Transcription factor bHLH34 OS=Arabidopsis thaliana OX=3702 GN=BHLH34 PE=2 SV=1	transcription factor ILR3 [Brachypodium distachyon]	molecular function: binding (GO:0005488)	--
	Unigene_179411	bHLH35	2.69e-11	-5.02554	down	4.8e-13	-7.92129	down	Helix-loop-helix DNA-binding domain	Transcription factor bHLH35 OS=Arabidopsis thaliana OX=3702 GN=BHLH35 PE=2 SV=1	bHLH27 [Triticum aestivum]	molecular function: nucleic acid binding transcription factor activity (GO:0001071);; biological process: biological regulation (GO:0065007);; molecular function: binding (GO:0005488)	MAPK signaling pathway - plant (ko04016);; Plant hormone signal transduction (ko04075)
	Unigene_323590	bHLH35	0.00896554	-3.04857	down	2.21e-07	-4.14947	down	Helix-loop-helix DNA-binding domain	Transcription factor bHLH35 OS=Arabidopsis thaliana OX=3702 GN=BHLH35 PE=2 SV=1	unnamed protein product [Triticum turgidum subsp. durum]	molecular function: nucleic acid binding transcription factor activity (GO:0001071);; biological process: biological regulation (GO:0065007);; molecular function: binding (GO:0005488)	MAPK signaling pathway - plant (ko04016);; Plant hormone signal transduction (ko04075)
	Unigene_012663	bHLH68	0.000308485	2.59099	up	3.15e-08	3.04065	up	--	Transcription factor bHLH68 OS=Arabidopsis thaliana OX=3702 GN=BHLH68 PE=1 SV=2	hypothetical protein CFC21_001375 [Triticum aestivum]	--	--
	Unigene_058391	bHLH68	0.0115852	1.69441	normal	4.69e-13	2.70432	up	--	Transcription factor bHLH68 OS=Arabidopsis thaliana OX=3702 GN=BHLH68 PE=1 SV=2	hypothetical protein CFC21_001375 [Triticum aestivum]	--	--
	Unigene_196843	bHLH68	4.28e-05	2.44362	up	5.94e-08	2.56161	up	--	Transcription factor bHLH68 OS=Arabidopsis thaliana OX=3702 GN=BHLH68 PE=1 SV=2	hypothetical protein CFC21_001375 [Triticum aestivum]	--	--
	Unigene_176484	bHLH93	8.21e-06	-3.61366	down	0.000212918	-3.34972	down	--	Transcription factor bHLH93 OS=Arabidopsis thaliana OX=3702 GN=BHLH93 PE=1 SV=1	unnamed protein product [Triticum turgidum subsp. durum]	--	--
	Unigene_199699	RHL1	0.0261803	1.54687	normal	5.76e-05	2.15187	up	Helix-loop-helix DNA-binding domain	bHLH transcription factor RHL1 OS=Lotus japonicus OX=34305 GN=RHL1 PE=2 SV=1	unnamed protein product [Triticum turgidum subsp. durum]	molecular function: binding (GO:0005488)	Plant-pathogen interaction (ko04626)
WRKY	Unigene_015555	WRKY3	0.0365621	1.87167	normal	0.000489424	2.00844	up	WRKY DNA -binding domain	Probable WRKY transcription factor 3 OS=Arabidopsis thaliana OX=3702 GN=WRKY3 PE=2 SV=1	hypothetical protein CFC21_022639 [Triticum aestivum]	molecular function: binding (GO:0005488);; biological process: response to stimulus (GO:0050896);; biological process: biological regulation (GO:0065007);; molecular function: nucleic acid binding transcription factor activity (GO:0001071);; cellular component: cell (GO:0005623);; cellular component: cell part (GO:0044464);; cellular component: organelle (GO:0043226)	MAPK signaling pathway - plant (ko04016);; Plant-pathogen interaction (ko04626)
	Unigene_196456	WRKY6	7.71e-05	2.90831	up	0.00402564	2.35903	up	WRKY DNA -binding domain	WRKY transcription factor 6 OS=Arabidopsis thaliana OX=3702 GN=WRKY6 PE=1 SV=1	unnamed protein product [Triticum turgidum subsp. durum]	molecular function: binding (GO:0005488);; molecular function: nucleic acid binding transcription factor activity (GO:0001071);; biological process: biological regulation (GO:0065007);; biological process: response to stimulus (GO:0050896);; biological process: cellular process (GO:0009987)	Plant-pathogen interaction (ko04626)
	Unigene_066205	WRKY28	0.000162557	-3.94615	down	0.000335517	-4.7052	down	WRKY DNA -binding domain	WRKY transcription factor WRKY28 OS=Oryza sativa subsp. japonica OX=39947 GN=WRKY28 PE=2 SV=2	unnamed protein product [Triticum turgidum subsp. durum]	biological process: biological regulation (GO:0065007);; molecular function: nucleic acid binding transcription factor activity (GO:0001071);; cellular component: cell (GO:0005623);; cellular component: cell part (GO:0044464);; cellular component: organelle (GO:0043226);; biological process: response to stimulus (GO:0050896);; biological process: multi-organism process (GO:0051704);; molecular fu…	Plant-pathogen interaction (ko04626)
	Unigene_590033	WRKY28	4.3e-05	-4.08879	down	7.35e-07	-6.23026	down	WRKY DNA -binding domain	WRKY transcription factor WRKY28 OS=Oryza sativa subsp. indica OX=39946 GN=WRKY28 PE=3 SV=2	drought resistance protein [Agropyron mongolicum]	biological process: biological regulation (GO:0065007);; molecular function: nucleic acid binding transcription factor activity (GO:0001071);; cellular component: cell (GO:0005623);; cellular component: cell part (GO:0044464);; cellular component: organelle (GO:0043226);; biological process: response to stimulus (GO:0050896);; biological process: multi-organism process (GO:0051704);; molecular fu…	Plant-pathogen interaction (ko04626)
	Unigene_591394	WRKY30	9.65e-05	-3.00609	down	3.05e-08	-4.9319	down	WRKY DNA -binding domain	Probable WRKY transcription factor 30 OS=Arabidopsis thaliana OX=3702 GN=WRKY30 PE=1 SV=1	WRKY5 transcription factor, partial [Triticum aestivum]	biological process: response to stimulus (GO:0050896);; biological process: immune system process (GO:0002376);; molecular function: binding (GO:0005488);; molecular function: nucleic acid binding transcription factor activity (GO:0001071);; biological process: biological regulation (GO:0065007);; cellular component: cell (GO:0005623);; cellular component: cell part (GO:0044464);; cellular compon…	Plant-pathogen interaction (ko04626)
	Unigene_518241	WRKY41	0.0230347	-2.13667	normal	1.83e-10	-6.4422	down	WRKY DNA -binding domain;; WRKY DNA -binding domain	Probable WRKY transcription factor 41 OS=Arabidopsis thaliana OX=3702 GN=WRKY41 PE=1 SV=2	drought resistance protein [Agropyron mongolicum]	biological process: response to stimulus (GO:0050896);; biological process: immune system process (GO:0002376);; molecular function: binding (GO:0005488);; molecular function: nucleic acid binding transcription factor activity (GO:0001071);; biological process: biological regulation (GO:0065007);; cellular component: cell (GO:0005623);; cellular component: cell part (GO:0044464);; cellular compon…	--
	Unigene_035890	WRKY41	9.7e-06	-2.93082	down	4.39e-10	-4.59593	down	WRKY DNA -binding domain;; WRKY DNA -binding domain	Probable WRKY transcription factor 41 OS=Arabidopsis thaliana OX=3702 GN=WRKY41 PE=1 SV=2	predicted protein, partial [Hordeum vulgare subsp. vulgare]	biological process: response to stimulus (GO:0050896);; biological process: immune system process (GO:0002376);; molecular function: binding (GO:0005488);; molecular function: nucleic acid binding transcription factor activity (GO:0001071);; biological process: biological regulation (GO:0065007);; cellular component: cell (GO:0005623);; cellular component: cell part (GO:0044464);; cellular compon…	--
	Unigene_074037	WRKY41	1.84e-05	-3.26759	down	0.000140297	-3.12772	down	Leucine rich repeat;; Leucine Rich repeats (2 copies);; Leucine Rich Repeat;; Leucine rich repeat N-terminal domain;; WRKY DNA -binding domain	Probable WRKY transcription factor 41 OS=Arabidopsis thaliana OX=3702 GN=WRKY41 PE=1 SV=2	predicted protein, partial [Hordeum vulgare subsp. vulgare]	molecular function: nucleic acid binding transcription factor activity (GO:0001071);; biological process: biological regulation (GO:0065007);; molecular function: binding (GO:0005488)	Plant-pathogen interaction (ko04626)
	Unigene_196170	WRKY41	6.67e-05	-3.06739	down	3.25e-06	-4.30636	down	WRKY DNA -binding domain	Probable WRKY transcription factor 41 OS=Arabidopsis thaliana OX=3702 GN=WRKY41 PE=1 SV=2	predicted protein, partial [Hordeum vulgare subsp. vulgare]	biological process: response to stimulus (GO:0050896);; biological process: immune system process (GO:0002376);; molecular function: binding (GO:0005488);; molecular function: nucleic acid binding transcription factor activity (GO:0001071);; biological process: biological regulation (GO:0065007);; cellular component: cell (GO:0005623);; cellular component: cell part (GO:0044464);; cellular compon…	Plant-pathogen interaction (ko04626)
	Unigene_519180	WRKY46	0.000198056	-5.15997	down	0.000147171	-5.40487	down	WRKY DNA -binding domain	Probable WRKY transcription factor 46 OS=Arabidopsis thaliana OX=3702 GN=WRKY46 PE=1 SV=1	putative WRKY transcription factor 46 [Hordeum vulgare]	molecular function: nucleic acid binding transcription factor activity (GO:0001071);; biological process: biological regulation (GO:0065007);; molecular function: binding (GO:0005488)	Plant-pathogen interaction (ko04626)
	Unigene_509435	WRKY50	9.62e-05	-3.05562	down	8.82e-13	-8.66151	down	WRKY DNA -binding domain	Probable WRKY transcription factor 50 OS=Arabidopsis thaliana OX=3702 GN=WRKY50 PE=2 SV=1	WRKY1 [Lolium perenne]	molecular function: nucleic acid binding transcription factor activity (GO:0001071);; biological process: biological regulation (GO:0065007);; molecular function: binding (GO:0005488)	MAPK signaling pathway - plant (ko04016);; Plant-pathogen interaction (ko04626)
	Unigene_024572	WRKY53	5.13e-06	-3.88327	down	8.5e-07	-4.55817	down	WRKY DNA -binding domain	Probable WRKY transcription factor 53 OS=Arabidopsis thaliana OX=3702 GN=WRKY53 PE=1 SV=1	predicted protein, partial [Hordeum vulgare subsp. vulgare]	biological process: response to stimulus (GO:0050896);; biological process: immune system process (GO:0002376);; molecular function: binding (GO:0005488);; molecular function: nucleic acid binding transcription factor activity (GO:0001071);; biological process: biological regulation (GO:0065007);; cellular component: cell (GO:0005623);; cellular component: cell part (GO:0044464);; cellular compon…	Plant-pathogen interaction (ko04626)
	Unigene_173279	WRKY53	0.00692096	-2.45849	down	2.73e-08	-6.65703	down	WRKY DNA -binding domain	Probable WRKY transcription factor 53 OS=Arabidopsis thaliana OX=3702 GN=WRKY53 PE=1 SV=1	drought resistance protein [Agropyron mongolicum]	biological process: response to stimulus (GO:0050896);; biological process: immune system process (GO:0002376);; molecular function: binding (GO:0005488);; molecular function: nucleic acid binding transcription factor activity (GO:0001071);; biological process: biological regulation (GO:0065007);; cellular component: cell (GO:0005623);; cellular component: cell part (GO:0044464);; cellular compon…	Plant-pathogen interaction (ko04626)
	Unigene_174368	WRKY54	1.81e-19	-7.98721	down	3.91e-17	-7.21159	down	WRKY DNA -binding domain	Probable WRKY transcription factor 54 OS=Arabidopsis thaliana OX=3702 GN=WRKY54 PE=1 SV=2	WRKY transcription factor 1 [Hordeum vulgare]	molecular function: nucleic acid binding transcription factor activity (GO:0001071);; biological process: biological regulation (GO:0065007);; molecular function: binding (GO:0005488)	Plant-pathogen interaction (ko04626)
	Unigene_512949	WRKY70	0.00107811	-2.88599	down	1.82e-14	-11.0347	down	WRKY DNA -binding domain	WRKY DNA-binding transcription factor 70 OS=Solanum lycopersicum OX=4081 GN=WRKY70 PE=2 SV=1	WRKY transcription factor 146 [Triticum aestivum]	biological process: response to stimulus (GO:0050896);; biological process: immune system process (GO:0002376);; biological process: biological regulation (GO:0065007);; molecular function: nucleic acid binding transcription factor activity (GO:0001071);; biological process: cellular process (GO:0009987);; biological process: signaling (GO:0023052);; biological process: single-organism process (G…	Plant-pathogen interaction (ko04626)
	Unigene_058081	WRKY70	1.44e-05	-3.33563	down	0.00391069	-2.07255	down	WRKY DNA -binding domain	WRKY DNA-binding transcription factor 70 OS=Solanum lycopersicum OX=4081 GN=WRKY70 PE=2 SV=1	unnamed protein product [Triticum aestivum]	biological process: response to stimulus (GO:0050896);; biological process: immune system process (GO:0002376);; biological process: biological regulation (GO:0065007);; molecular function: nucleic acid binding transcription factor activity (GO:0001071);; biological process: cellular process (GO:0009987);; biological process: signaling (GO:0023052);; biological process: single-organism process (G…	Plant-pathogen interaction (ko04626)
	Unigene_594408	WRKY70	0.0369392	-2.85563	normal	8.07e-05	-5.57696	down	WRKY DNA -binding domain	WRKY DNA-binding transcription factor 70 OS=Solanum lycopersicum OX=4081 GN=WRKY70 PE=2 SV=1	--	molecular function: nucleic acid binding transcription factor activity (GO:0001071);; biological process: biological regulation (GO:0065007);; molecular function: binding (GO:0005488)	Plant-pathogen interaction (ko04626)
	Unigene_071886	WRKY71	0.000159398	-3.33394	down	0.000387472	-3.10752	down	WRKY DNA -binding domain	WRKY transcription factor WRKY71 OS=Oryza sativa subsp. indica OX=39946 GN=WRKY71 PE=1 SV=1	WRKY80 transcription factor [Triticum aestivum]	molecular function: nucleic acid binding transcription factor activity (GO:0001071);; biological process: biological regulation (GO:0065007);; molecular function: binding (GO:0005488)	Plant-pathogen interaction (ko04626)
	Unigene_187802	WRKY71	0.00144404	-2.52981	down	0.00224252	-2.56092	down	WRKY DNA -binding domain	WRKY transcription factor WRKY71 OS=Oryza sativa subsp. indica OX=39946 GN=WRKY71 PE=1 SV=1	WRKY4 transcription factor, partial [Stipa purpurea]	molecular function: nucleic acid binding transcription factor activity (GO:0001071);; biological process: biological regulation (GO:0065007);; molecular function: binding (GO:0005488)	MAPK signaling pathway - plant (ko04016);; Plant-pathogen interaction (ko04626)
	Unigene_040180	WRKY72	0.000878944	4.03934	up	1.78e-06	5.96464	up	--	Probable WRKY transcription factor 72 OS=Arabidopsis thaliana OX=3702 GN=WRKY72 PE=2 SV=1	hypothetical protein CFC21_107309 [Triticum aestivum]	molecular function: nucleic acid binding transcription factor activity (GO:0001071);; biological process: biological regulation (GO:0065007);; biological process: response to stimulus (GO:0050896)	--
	Unigene_177117	WRKY76	4.21e-12	-7.19719	down	2.9e-05	-5.95141	down	WRKY DNA -binding domain	WRKY transcription factor WRKY76 OS=Oryza sativa subsp. japonica OX=39947 GN=WRKY76 PE=2 SV=1	hypothetical protein CFC21_077795 [Triticum aestivum]	biological process: response to stimulus (GO:0050896);; molecular function: nucleic acid binding transcription factor activity (GO:0001071);; biological process: biological regulation (GO:0065007);; biological process: multi-organism process (GO:0051704);; molecular function: binding (GO:0005488)	MAPK signaling pathway - plant (ko04016);; Plant-pathogen interaction (ko04626)
	Unigene_302797	WRKY76	4.66e-11	-5.91805	down	1.04e-16	-5.16398	down	--	WRKY transcription factor WRKY76 OS=Oryza sativa subsp. indica OX=39946 GN=WRKY76 PE=2 SV=1	drought resistance protein [Agropyron mongolicum]	biological process: response to stimulus (GO:0050896);; biological process: multi-organism process (GO:0051704)	--
	Unigene_505870	WRKY76	2.96e-25	-6.53954	down	5.27e-24	-8.69756	down	--	WRKY transcription factor WRKY76 OS=Oryza sativa subsp. indica OX=39946 GN=WRKY76 PE=2 SV=1	drought resistance protein [Agropyron mongolicum]	biological process: response to stimulus (GO:0050896);; biological process: multi-organism process (GO:0051704)	--
bZIP	Unigene_070759	RISBZ2	9.69e-11	-4.36746	down	3.68e-14	-4.82682	down	Basic leucine-zipper C terminal;; bZIP transcription factor;; Basic region leucine zipper	bZIP transcription factor RISBZ2 OS=Oryza sativa subsp. japonica OX=39947 GN=RISBZ2 PE=1 SV=1	unnamed protein product [Triticum turgidum subsp. durum]	biological process: response to stimulus (GO:0050896);; biological process: cellular process (GO:0009987);; biological process: single-organism process (GO:0044699);; biological process: biological regulation (GO:0065007);; molecular function: nucleic acid binding transcription factor activity (GO:0001071);; molecular function: binding (GO:0005488);; cellular component: cell (GO:0005623);; cellul…	--
	Unigene_516706	BZIP12	0.0336856	-2.3798	normal	0.000891237	-3.31283	down	bZIP transcription factor;; Basic region leucine zipper	bZIP transcription factor 12 OS=Oryza sativa subsp. japonica OX=39947 GN=BZIP12 PE=2 SV=1	hypothetical protein CFC21_037075 [Triticum aestivum]	molecular function: binding (GO:0005488);; molecular function: nucleic acid binding transcription factor activity (GO:0001071);; biological process: biological regulation (GO:0065007);; cellular component: cell (GO:0005623);; cellular component: cell part (GO:0044464);; cellular component: organelle (GO:0043226)	Plant hormone signal transduction (ko04075)
	Unigene_318335	BZIP1-D	0.0385777	1.45138	normal	0.00051848	1.89651	up	Disordered region downstream of MFMR;; G-box binding protein MFMR;; bZIP transcription factor;; Basic region leucine zipper	bZIP transcription factor 1-D OS=Triticum aestivum OX=4565 GN=BZIP1-D PE=2 SV=1	transcription factor HBP-1a [Brachypodium distachyon]	molecular function: binding (GO:0005488);; molecular function: nucleic acid binding transcription factor activity (GO:0001071);; biological process: biological regulation (GO:0065007);; cellular component: cell (GO:0005623);; cellular component: cell part (GO:0044464);; cellular component: organelle (GO:0043226)	--
	Unigene_311933	BZIP23	0.0231304	1.67695	normal	8.4e-09	2.37476	up	bZIP transcription factor;; Basic region leucine zipper;; bZIP Maf transcription factor	bZIP transcription factor 23 OS=Oryza sativa subsp. japonica OX=39947 GN=BZIP23 PE=2 SV=1	hypothetical protein CFC21_084735 [Triticum aestivum]	molecular function: binding (GO:0005488);; biological process: response to stimulus (GO:0050896);; molecular function: nucleic acid binding transcription factor activity (GO:0001071);; biological process: biological regulation (GO:0065007);; cellular component: cell (GO:0005623);; cellular component: cell part (GO:0044464);; cellular component: organelle (GO:0043226);; biological process: cellula…	Plant hormone signal transduction (ko04075)
	Unigene_321809	BZIP29	0.00844128	2.17153	up	0.000189676	2.86108	up	bZIP transcription factor;; Basic region leucine zipper	bZIP transcription factor 29 OS=Arabidopsis thaliana OX=3702 GN=BZIP29 PE=2 SV=1	bZiP-like trancription factor [Triticum aestivum]	molecular function: nucleic acid binding transcription factor activity (GO:0001071);; biological process: biological regulation (GO:0065007);; cellular component: cell (GO:0005623);; cellular component: cell part (GO:0044464);; cellular component: organelle (GO:0043226)	MAPK signaling pathway - plant (ko04016)
	Unigene_190582	BZIP44	0.0155632	1.67935	normal	6.44e-13	2.88279	up	bZIP transcription factor;; Basic region leucine zipper	bZIP transcription factor 44 OS=Arabidopsis thaliana OX=3702 GN=BZIP44 PE=1 SV=1	hypothetical protein CFC21_035253 [Triticum aestivum]	molecular function: nucleic acid binding transcription factor activity (GO:0001071);; biological process: biological regulation (GO:0065007)	--
	Unigene_310642	RISBZ2	3.47e-09	-3.39017	down	1.18e-10	-2.85139	down	Basic leucine-zipper C terminal;; bZIP transcription factor;; Basic region leucine zipper	bZIP transcription factor RISBZ2 OS=Oryza sativa subsp. japonica OX=39947 GN=RISBZ2 PE=1 SV=1	hypothetical protein CFC21_068212 [Triticum aestivum]	biological process: response to stimulus (GO:0050896);; biological process: cellular process (GO:0009987);; biological process: single-organism process (GO:0044699);; biological process: biological regulation (GO:0065007);; molecular function: nucleic acid binding transcription factor activity (GO:0001071);; molecular function: binding (GO:0005488);; cellular component: cell (GO:0005623);; cellul…	--
	Unigene_526430	RISBZ2	0.00207214	-2.31411	down	0.00393927	-2.27134	down	Basic leucine-zipper C terminal;; bZIP transcription factor;; Basic region leucine zipper	bZIP transcription factor RISBZ2 OS=Oryza sativa subsp. japonica OX=39947 GN=RISBZ2 PE=1 SV=1	hypothetical protein CFC21_068212 [Triticum aestivum]	biological process: response to stimulus (GO:0050896);; biological process: cellular process (GO:0009987);; biological process: single-organism process (GO:0044699);; biological process: biological regulation (GO:0065007);; molecular function: nucleic acid binding transcription factor activity (GO:0001071);; molecular function: binding (GO:0005488);; cellular component: cell (GO:0005623);; cellul…	--
	Unigene_594009	RISBZ2	0.000684172	-2.53509	down	2.7e-08	-5.84518	down	Basic leucine-zipper C terminal;; bZIP transcription factor;; Basic region leucine zipper	bZIP transcription factor RISBZ2 OS=Oryza sativa subsp. japonica OX=39947 GN=RISBZ2 PE=1 SV=1	hypothetical protein CFC21_068212 [Triticum aestivum]	biological process: response to stimulus (GO:0050896);; biological process: cellular process (GO:0009987);; biological process: single-organism process (GO:0044699);; biological process: biological regulation (GO:0065007);; molecular function: nucleic acid binding transcription factor activity (GO:0001071);; molecular function: binding (GO:0005488);; cellular component: cell (GO:0005623);; cellul…	--
	Unigene_173485	RISBZ5	3.08e-11	-7.39554	down	0.002899	-4.27292	down	Basic leucine-zipper C terminal	bZIP transcription factor RISBZ5 OS=Oryza sativa subsp. japonica OX=39947 GN=RISBZ5 PE=2 SV=1	bZIP transcription factor RISBZ5 [Setaria italica]	--	--
	Unigene_313433	RISBZ5	0.00365554	-3.60626	down	0.000680886	-4.03833	down	bZIP transcription factor;; Basic region leucine zipper	bZIP transcription factor RISBZ5 OS=Oryza sativa subsp. japonica OX=39947 GN=RISBZ5 PE=2 SV=1	bZIP transcription factor RISBZ5 isoform X1 [Brachypodium distachyon]	molecular function: nucleic acid binding transcription factor activity (GO:0001071);; biological process: biological regulation (GO:0065007)	--
	Unigene_515127	RISBZ5	9.27e-06	-3.79032	down	2.7e-08	-5.55267	down	bZIP transcription factor;; Basic leucine-zipper C terminal	bZIP transcription factor RISBZ5 OS=Oryza sativa subsp. japonica OX=39947 GN=RISBZ5 PE=2 SV=1	hypothetical protein BRADI_1g31700v3 [Brachypodium distachyon]	molecular function: nucleic acid binding transcription factor activity (GO:0001071);; biological process: biological regulation (GO:0065007)	--
	Unigene_198264	TGA10	8.33e-06	-3.10172	down	2.92e-13	-3.36729	down	Abhydrolase domain containing 18;; alpha/beta hydrolase fold;; Seed dormancy control;; Basic region leucine zipper	bZIP transcription factor TGA10 OS=Nicotiana tabacum OX=4097 GN=TGA10 PE=1 SV=1	unnamed protein product [Triticum turgidum subsp. durum]	molecular function: nucleic acid binding transcription factor activity (GO:0001071);; biological process: biological regulation (GO:0065007);; biological process: metabolic process (GO:0008152);; biological process: cellular process (GO:0009987);; molecular function: binding (GO:0005488)	Plant hormone signal transduction (ko04075)
MADS-box	Unigene_513812	MADS18	0.990605	0.0195379	normal	2.32e-05	-3.48732	down	K-box region;; SRF-type transcription factor (DNA-binding and dimerisation domain)	MADS-box transcription factor 18 OS=Oryza sativa subsp. indica OX=39946 GN=MADS18 PE=2 SV=2	MADS-box transcription factor 18 [Brachypodium distachyon]	molecular function: binding (GO:0005488);; molecular function: nucleic acid binding transcription factor activity (GO:0001071);; biological process: biological regulation (GO:0065007);; cellular component: cell (GO:0005623);; cellular component: organelle (GO:0043226);; cellular component: cell part (GO:0044464)	--
	Unigene_070719	MADS22	0.00113936	2.83514	up	7.27e-29	3.12577	up	SRF-type transcription factor (DNA-binding and dimerisation domain);; K-box region	MADS-box transcription factor 22 OS=Oryza sativa subsp. japonica OX=39947 GN=MADS22 PE=2 SV=1	hypothetical protein BRADI_3g58220v3 [Brachypodium distachyon]	biological process: reproduction (GO:0000003);; molecular function: binding (GO:0005488);; molecular function: translation regulator activity (GO:0045182);; biological process: biological regulation (GO:0065007);; biological process: reproductive process (GO:0022414);; biological process: developmental process (GO:0032502);; molecular function: nucleic acid binding transcription factor activity (…	--
	Unigene_192417	MADS22	6.21e-06	3.09521	up	1.88e-16	4.42326	up	K-box region	MADS-box transcription factor 22 OS=Oryza sativa subsp. japonica OX=39947 GN=MADS22 PE=2 SV=1	MADS10 [Lolium perenne]	biological process: reproduction (GO:0000003);; molecular function: binding (GO:0005488);; molecular function: translation regulator activity (GO:0045182);; biological process: biological regulation (GO:0065007);; biological process: reproductive process (GO:0022414);; biological process: developmental process (GO:0032502);; molecular function: nucleic acid binding transcription factor activity (…	--
	Unigene_321354	MADS22	0.00281262	2.90011	up	1.18e-05	2.56301	up	SRF-type transcription factor (DNA-binding and dimerisation domain)	MADS-box transcription factor 22 OS=Oryza sativa subsp. japonica OX=39947 GN=MADS22 PE=2 SV=1	hypothetical protein GQ55_1G398400 [Panicum hallii var. hallii]	molecular function: binding (GO:0005488)	--
	Unigene_574299	MADS29	0.0880468	-2.06136	normal	6.75e-05	-6.00967	down	--	MADS-box transcription factor 29 OS=Oryza sativa subsp. japonica OX=39947 GN=MADS29 PE=2 SV=1	--	biological process: reproduction (GO:0000003);; biological process: metabolic process (GO:0008152);; biological process: single-organism process (GO:0044699);; biological process: biological regulation (GO:0065007);; biological process: reproductive process (GO:0022414);; biological process: developmental process (GO:0032502);; molecular function: nucleic acid binding transcription factor activit…	--
	Unigene_180085	MADS51	0.000816408	-2.54103	down	1.49e-17	-2.98269	down	SRF-type transcription factor (DNA-binding and dimerisation domain)	MADS-box transcription factor 51 OS=Oryza sativa subsp. japonica OX=39947 GN=MADS51 PE=2 SV=1	hypothetical protein CFC21_043611 [Triticum aestivum]	molecular function: binding (GO:0005488);; biological process: biological regulation (GO:0065007)	--
	Unigene_186973	MADS55	7.36e-05	2.79883	up	8.07e-31	5.14674	up	--	MADS-box transcription factor 55 OS=Oryza sativa subsp. japonica OX=39947 GN=MADS55 PE=2 SV=2	MADS10 [Lolium perenne]	biological process: reproduction (GO:0000003);; molecular function: binding (GO:0005488);; molecular function: translation regulator activity (GO:0045182);; biological process: biological regulation (GO:0065007);; biological process: reproductive process (GO:0022414);; biological process: developmental process (GO:0032502);; molecular function: nucleic acid binding transcription factor activity (…	--
	Unigene_066303	MADS56	0.00580054	-1.82374	down	0.000983911	-1.1704	down	SRF-type transcription factor (DNA-binding and dimerisation domain);; K-box region	MADS-box transcription factor 56 OS=Oryza sativa subsp. indica OX=39946 GN=MADS56 PE=2 SV=2	MADS-box transcription factor TaAGL38 [Triticum aestivum]	molecular function: binding (GO:0005488);; molecular function: nucleic acid binding transcription factor activity (GO:0001071);; biological process: biological regulation (GO:0065007);; cellular component: cell (GO:0005623);; cellular component: organelle (GO:0043226);; cellular component: cell part (GO:0044464)	--
MYB	Unigene_177118	MYBS1	1.9555e-05	3.30468	up	8.64e-10	4.11215	up	Myb-like DNA-binding domain;; Myb-like DNA-binding domain	Transcription factor MYBS1 OS=Oryza sativa subsp. indica OX=39946 GN=MYBS1 PE=3 SV=1	transcription factor MYBS1 [Brachypodium distachyon]	--	--
	Unigene_067675	MYBS3	1.74e-11	-3.90567	down	2.16e-16	-5.16843	down	Myb-like DNA-binding domain	Transcription factor MYBS3 OS=Oryza sativa subsp. japonica OX=39947 GN=MYBS3 PE=2 SV=1	transcription factor SRM1-like [Aegilops tauschii subsp. tauschii]	--	--
	Unigene_317734	MYBS3	0.00457019	-1.59547	down	1.2e-05	-1.41462	down	Myb-like DNA-binding domain	Transcription factor MYBS3 OS=Oryza sativa subsp. japonica OX=39947 GN=MYBS3 PE=2 SV=1	unnamed protein product [Triticum turgidum subsp. durum]	molecular function: nucleic acid binding transcription factor activity (GO:0001071);; biological process: biological regulation (GO:0065007)	--
	Unigene_170670	——	0.000137124	-4.03866	down	9.86e-08	-8.66147	down	--	Myb-related protein Zm38 OS=Zea mays OX=4577 PE=2 SV=1	myb-related protein Zm38-like [Aegilops tauschii subsp. tauschii]	--	--
	Unigene_073691	MYB44	0.0023626	2.28126	up	8.14e-05	2.41288	up	Myb-like DNA-binding domain;; Myb-like DNA-binding domain	Transcription factor MYB44 OS=Arabidopsis thaliana OX=3702 GN=MYB44 PE=1 SV=1	transcription factor MYB44-like [Aegilops tauschii subsp. tauschii]	--	--
	Unigene_169730	MYB86	1.28e-05	5.71293	up	1.53e-06	7.77428	up	Myb-like DNA-binding domain	Transcription factor MYB86 OS=Arabidopsis thaliana OX=3702 GN=MYB86 PE=2 SV=1	transcription factor LAF1-like [Aegilops tauschii subsp. tauschii]	--	--
BEL1	Unigene_325761	BEL1	0.0346547	1.18761	normal	0.00704622	1.19612	up	Associated with HOX;; Homeobox KN domain;; Homeodomain;; Starch binding domain	Homeobox protein BEL1 homolog OS=Arabidopsis thaliana OX=3702 GN=BEL1 PE=1 SV=2	hypothetical protein CFC21_059399 [Triticum aestivum]	molecular function: binding (GO:0005488);; molecular function: nucleic acid binding transcription factor activity (GO:0001071);; biological process: biological regulation (GO:0065007);; cellular component: cell (GO:0005623);; cellular component: cell part (GO:0044464);; cellular component: organelle (GO:0043226);; cellular component: cell junction (GO:0030054);; cellular component: symplast (GO:0…	--
	Unigene_601590	BLH1	0.0707538	1.37775	normal	2.12e-07	2.77209	up	Homeobox KN domain;; Homeodomain	BEL1-like homeodomain protein 1 OS=Arabidopsis thaliana OX=3702 GN=BLH1 PE=1 SV=1	hypothetical protein CFC21_057094 [Triticum aestivum]	biological process: cellular process (GO:0009987);; biological process: cellular component organization or biogenesis (GO:0071840);; biological process: response to stimulus (GO:0050896);; molecular function: binding (GO:0005488);; molecular function: nucleic acid binding transcription factor activity (GO:0001071);; biological process: biological regulation (GO:0065007);; cellular component: cell…	--
	Unigene_313871	BLH7	0.0615482	1.26036	normal	1.42e-16	3.0516	up	Associated with HOX;; Homeobox KN domain;; Homeodomain	BEL1-like homeodomain protein 7 OS=Arabidopsis thaliana OX=3702 GN=BLH7 PE=1 SV=1	BEL1-like homeodomain protein 7 [Aegilops tauschii subsp. tauschii]	molecular function: binding (GO:0005488);; biological process: biological regulation (GO:0065007)	--
AP2/ERF	Unigene_197310	At4g13040	1.12556e-05	3.10427	up	8.89e-05	2.91244	up	AP2 domain	Ethylene-responsive transcription factor-like protein At4g13040 OS=Arabidopsis thaliana OX=3702 GN=At4g13040 PE=2 SV=2	ethylene responsive factor [Cynodon dactylon]	molecular function: nucleic acid binding transcription factor activity (GO:0001071);; biological process: biological regulation (GO:0065007)	MAPK signaling pathway - plant (ko04016);; Plant-pathogen interaction (ko04626)
	Unigene_309883	At4g13040	1.21102e-05	3.29114	up	1.57e-08	3.91717	up	AP2 domain	Ethylene-responsive transcription factor-like protein At4g13040 OS=Arabidopsis thaliana OX=3702 GN=At4g13040 PE=2 SV=2	ethylene-responsive transcription factor-like protein At4g13040 isoform X1 [Brachypodium distachyon]	molecular function: nucleic acid binding transcription factor activity (GO:0001071);; biological process: biological regulation (GO:0065007)	MAPK signaling pathway - plant (ko04016);; Plant-pathogen interaction (ko04626)
	Unigene_600094	At4g13040	5.48409e-05	3.49535	up	6.96e-05	1.36346	up	AP2 domain	Ethylene-responsive transcription factor-like protein At4g13040 OS=Arabidopsis thaliana OX=3702 GN=At4g13040 PE=2 SV=2	ethylene-responsive transcription factor-like protein At4g13040 [Aegilops tauschii subsp. tauschii]	molecular function: nucleic acid binding transcription factor activity (GO:0001071);; biological process: biological regulation (GO:0065007)	Plant-pathogen interaction (ko04626)
	Unigene_193743	BBM	9.97559e-05	3.8625	up	2.22e-07	2.65107	up	AP2 domain	AP2-like ethylene-responsive transcription factor BBM OS=Arabidopsis thaliana OX=3702 GN=BBM PE=2 SV=2	AP2-like ethylene-responsive transcription factor BBM1 [Aegilops tauschii subsp. tauschii]	molecular function: nucleic acid binding transcription factor activity (GO:0001071);; biological process: biological regulation (GO:0065007)	Plant-pathogen interaction (ko04626)
	Unigene_197025	EREBP1	0.925747	0.146937	normal	0.00024608	-4.26784	down	AP2 domain	Ethylene-responsive transcription factor 1 OS=Oryza sativa subsp. japonica OX=39947 GN=EREBP1 PE=1 SV=1	Ethylene-responsive transcription factor RAP2-3 [Hordeum vulgare]	molecular function: nucleic acid binding transcription factor activity (GO:0001071);; biological process: biological regulation (GO:0065007)	--
	Unigene_071491	EREBP1	0.0807631	-1.25015	normal	1.8e-09	-2.50415	down	--	Ethylene-responsive transcription factor 1 OS=Oryza sativa subsp. japonica OX=39947 GN=EREBP1 PE=1 SV=1	ethylene-responsive transcription factor 1-like [Aegilops tauschii subsp. tauschii]	molecular function: nucleic acid binding transcription factor activity (GO:0001071);; biological process: biological regulation (GO:0065007)	--
	Unigene_520025	EREBP1	0.759632	0.425328	normal	1.11e-07	-7.19178	down	AP2 domain	Ethylene-responsive transcription factor 1 OS=Oryza sativa subsp. japonica OX=39947 GN=EREBP1 PE=1 SV=1	unnamed protein product [Triticum turgidum subsp. durum]	biological process: response to stimulus (GO:0050896);; molecular function: binding (GO:0005488);; molecular function: nucleic acid binding transcription factor activity (GO:0001071);; biological process: biological regulation (GO:0065007);; cellular component: cell (GO:0005623);; cellular component: cell part (GO:0044464);; cellular component: organelle (GO:0043226);; cellular component: membran…	--
	Unigene_595796	ERF008	0.578398	-0.636464	normal	0.000150382	-4.62994	down	AP2 domain	Ethylene-responsive transcription factor ERF008 OS=Arabidopsis thaliana OX=3702 GN=ERF008 PE=2 SV=1	--	biological process: response to stimulus (GO:0050896);; molecular function: nucleic acid binding transcription factor activity (GO:0001071);; biological process: biological regulation (GO:0065007)	--
	Unigene_185468	ERF053	0.00444736	2.64159	up	0.115887	1.36471	normal	AP2 domain	Ethylene-responsive transcription factor ERF053 OS=Arabidopsis thaliana OX=3702 GN=ERF053 PE=1 SV=1	--	molecular function: nucleic acid binding transcription factor activity (GO:0001071);; biological process: biological regulation (GO:0065007)	--
	Unigene_172484	ERF110	4.68e-05	5.44134	up	1.09e-05	7.30222	up	--	Ethylene-responsive transcription factor ERF110 OS=Arabidopsis thaliana OX=3702 GN=ERF110 PE=2 SV=2	ethylene-responsive transcription factor ABR1-like [Panicum miliaceum]	biological process: response to stimulus (GO:0050896);; molecular function: nucleic acid binding transcription factor activity (GO:0001071);; biological process: biological regulation (GO:0065007);; biological process: multi-organism process (GO:0051704)	Spliceosome (ko03040)
	Unigene_303347	ERF110	3.37e-11	7.47843	up	1.06e-08	8.72542	up	--	Ethylene-responsive transcription factor ERF110 OS=Arabidopsis thaliana OX=3702 GN=ERF110 PE=2 SV=2	F-box domain containing protein [Hordeum vulgare]	biological process: response to stimulus (GO:0050896);; molecular function: nucleic acid binding transcription factor activity (GO:0001071);; biological process: biological regulation (GO:0065007);; biological process: multi-organism process (GO:0051704)	Spliceosome (ko03040)
	Unigene_321682	ERF110	--	--	--	0.00049616	2.86184	up	AP2 domain	Ethylene-responsive transcription factor ERF110 OS=Arabidopsis thaliana OX=3702 GN=ERF110 PE=2 SV=2	F-box domain containing protein [Hordeum vulgare]	biological process: response to stimulus (GO:0050896);; molecular function: nucleic acid binding transcription factor activity (GO:0001071);; biological process: biological regulation (GO:0065007);; biological process: multi-organism process (GO:0051704)	Spliceosome (ko03040)
	Unigene_074722	ERF117	9.04583e-05	3.22536	up	3.44e-08	2.4058	up	AP2 domain	Ethylene-responsive transcription factor ERF117 OS=Arabidopsis thaliana OX=3702 GN=ERF117 PE=2 SV=1	pathogenesis-related genes transcriptional activator PTI6-like [Aegilops tauschii subsp. tauschii]	molecular function: nucleic acid binding transcription factor activity (GO:0001071);; biological process: biological regulation (GO:0065007);; biological process: multicellular organismal process (GO:0032501);; biological process: developmental process (GO:0032502);; biological process: single-organism process (GO:0044699)	--
	Unigene_591623	ERF117	2.13875e-05	3.27803	up	2.76e-09	4.89619	up	AP2 domain	Ethylene-responsive transcription factor ERF117 OS=Arabidopsis thaliana OX=3702 GN=ERF117 PE=2 SV=1	dehydration-responsive element-binding protein 2D [Brachypodium distachyon]	molecular function: nucleic acid binding transcription factor activity (GO:0001071);; biological process: biological regulation (GO:0065007)	Plant-pathogen interaction (ko04626)
	Unigene_197153	ERF12	0.00585798	2.59964	up	0.0321297	1.62651	normal	Starch binding domain;; AP2 domain	Ethylene-responsive transcription factor 12 OS=Arabidopsis thaliana OX=3702 GN=ERF12 PE=1 SV=1	uncharacterized protein LOC109770157 [Aegilops tauschii subsp. tauschii]	molecular function: nucleic acid binding transcription factor activity (GO:0001071);; biological process: biological regulation (GO:0065007);; molecular function: binding (GO:0005488)	Plant hormone signal transduction (ko04075)
	Unigene_037808	ERF1A	0.00412524	-2.89877	down	0.0030981	-3.84939	down	AP2 domain	Ethylene-responsive transcription factor 1A OS=Arabidopsis thaliana OX=3702 GN=ERF1A PE=1 SV=2	ethylene-responsive transcription factor 1-like [Hordeum vulgare]	biological process: cellular process (GO:0009987);; biological process: signaling (GO:0023052);; biological process: single-organism process (GO:0044699);; biological process: response to stimulus (GO:0050896);; biological process: biological regulation (GO:0065007);; biological process: immune system process (GO:0002376);; molecular function: nucleic acid binding transcription factor activity (G…	Plant hormone signal transduction (ko04075)
	Unigene_518350	ERF2	0.00537285	-2.66426	down	3.22e-09	-5.68535	down	AP2 domain	Ethylene-responsive transcription factor 2 OS=Nicotiana sylvestris OX=4096 GN=ERF2 PE=2 SV=1	ethylene-responsive factor [Thinopyrum intermedium]	biological process: cellular process (GO:0009987);; biological process: signaling (GO:0023052);; biological process: single-organism process (GO:0044699);; biological process: response to stimulus (GO:0050896);; biological process: biological regulation (GO:0065007);; biological process: immune system process (GO:0002376);; molecular function: nucleic acid binding transcription factor activity (G…	Plant hormone signal transduction (ko04075)
	Unigene_603633	ERF2	0.14567	-1.66221	normal	0.000134294	-5.37244	down	AP2 domain	Ethylene-responsive transcription factor 2 OS=Nicotiana sylvestris OX=4096 GN=ERF2 PE=2 SV=1	pathogen-inducible transcription factor ERF3 [Triticum aestivum]	biological process: cellular process (GO:0009987);; biological process: signaling (GO:0023052);; biological process: single-organism process (GO:0044699);; biological process: response to stimulus (GO:0050896);; biological process: biological regulation (GO:0065007);; biological process: immune system process (GO:0002376);; molecular function: nucleic acid binding transcription factor activity (G…	Plant hormone signal transduction (ko04075)
	Unigene_177108	ERF3	0.00726197	-3.26873	down	0.00516286	-3.73945	down	AP2 domain	Ethylene-responsive transcription factor 3 OS=Nicotiana tabacum OX=4097 GN=ERF3 PE=2 SV=1	unnamed protein product [Triticum turgidum subsp. durum]	molecular function: nucleic acid binding transcription factor activity (GO:0001071);; biological process: biological regulation (GO:0065007)	Plant hormone signal transduction (ko04075)
	Unigene_513354	ERF3	0.642552	-0.582019	normal	2.81e-05	-5.92264	down	AP2 domain	Ethylene-responsive transcription factor 3 OS=Nicotiana tabacum OX=4097 GN=ERF3 PE=2 SV=1	hypothetical protein CFC21_082704 [Triticum aestivum]	biological process: cellular process (GO:0009987);; biological process: signaling (GO:0023052);; biological process: single-organism process (GO:0044699);; biological process: response to stimulus (GO:0050896);; biological process: biological regulation (GO:0065007);; molecular function: binding (GO:0005488);; molecular function: nucleic acid binding transcription factor activity (GO:0001071);; c…	Plant hormone signal transduction (ko04075)
	Unigene_514995	ERF3	0.432738	-1.07325	normal	7.06e-07	-8.30395	down	AP2 domain	Ethylene-responsive transcription factor 3 OS=Nicotiana tabacum OX=4097 GN=ERF3 PE=2 SV=1	ethylene-responsive transcription factor 3-like [Aegilops tauschii subsp. tauschii]	molecular function: nucleic acid binding transcription factor activity (GO:0001071);; biological process: biological regulation (GO:0065007)	Plant hormone signal transduction (ko04075)
	Unigene_522674	ERF3	0.595122	-0.80438	normal	0.000299802	-4.6286	down	--	Ethylene-responsive transcription factor 3 OS=Nicotiana tabacum OX=4097 GN=ERF3 PE=2 SV=1	hypothetical protein CFC21_083127 [Triticum aestivum]	--	Plant hormone signal transduction (ko04075)
	Unigene_064917	ERF4	0.296001	-1.11381	normal	2.83e-11	-6.80909	down	AP2 domain	Ethylene-responsive transcription factor 4 OS=Arabidopsis thaliana OX=3702 GN=ERF4 PE=1 SV=1	ethylene-responsive factor-like transcription factor ERFL2b [Hordeum vulgare]	molecular function: nucleic acid binding transcription factor activity (GO:0001071);; biological process: biological regulation (GO:0065007)	MAPK signaling pathway - plant (ko04016);; Plant-pathogen interaction (ko04626)
	Unigene_597634	ERF4	0.594527	-0.78951	normal	1.23e-06	-7.28308	down	--	Ethylene-responsive transcription factor 4 OS=Arabidopsis thaliana OX=3702 GN=ERF4 PE=1 SV=1	ethylene-responsive transcription factor 3 [Agropyron mongolicum]	--	MAPK signaling pathway - plant (ko04016);; Plant-pathogen interaction (ko04626)
	Unigene_318479	ERF4	0.00459965	-3.18413	down	9.8e-06	-5.00654	down	AP2 domain	Ethylene-responsive transcription factor 4 OS=Nicotiana sylvestris OX=4096 GN=ERF4 PE=2 SV=1	ethylene-responsive transcription factor 4 [Setaria italica]	molecular function: nucleic acid binding transcription factor activity (GO:0001071);; biological process: biological regulation (GO:0065007)	--
	Unigene_175470	ERF4	0.0685889	-3.04428	normal	8.15e-07	-6.4312	down	AP2 domain	Ethylene-responsive transcription factor 4 OS=Arabidopsis thaliana OX=3702 GN=ERF4 PE=1 SV=1	ethylene-responsive transcription factor 3 [Agropyron mongolicum]	molecular function: nucleic acid binding transcription factor activity (GO:0001071);; biological process: biological regulation (GO:0065007)	--
	Unigene_593418	ERF4	0.124315	-1.47775	normal	5.62e-07	-5.57304	down	AP2 domain	Ethylene-responsive transcription factor 4 OS=Nicotiana tabacum OX=4097 GN=ERF4 PE=1 SV=1	ethylene-responsive transcription factor 4 [Setaria italica]	molecular function: nucleic acid binding transcription factor activity (GO:0001071);; biological process: biological regulation (GO:0065007)	--
	Unigene_185357	ERF5	0.00196229	-3.5142	down	8.85e-05	-5.16226	down	AP2 domain	Ethylene-responsive transcription factor 5 OS=Nicotiana tabacum OX=4097 GN=ERF5 PE=2 SV=1	--	biological process: cellular process (GO:0009987);; biological process: signaling (GO:0023052);; biological process: single-organism process (GO:0044699);; biological process: response to stimulus (GO:0050896);; biological process: biological regulation (GO:0065007);; molecular function: binding (GO:0005488);; molecular function: nucleic acid binding transcription factor activity (GO:0001071);; c…	MAPK signaling pathway - plant (ko04016);; Plant-pathogen interaction (ko04626)
	Unigene_591056	ERF5	0.0209323	-2.85183	normal	4.36e-05	-4.68683	down	AP2 domain	Ethylene-responsive transcription factor 5 OS=Nicotiana tabacum OX=4097 GN=ERF5 PE=2 SV=1	ethylene-responsive transcription factor 5-like [Aegilops tauschii subsp. tauschii]	biological process: cellular process (GO:0009987);; biological process: signaling (GO:0023052);; biological process: single-organism process (GO:0044699);; biological process: response to stimulus (GO:0050896);; biological process: biological regulation (GO:0065007);; molecular function: binding (GO:0005488);; molecular function: nucleic acid binding transcription factor activity (GO:0001071);; c…	--
	Unigene_518442	ERF6	0.00444713	-2.79998	down	6.53e-06	-5.54111	down	AP2 domain	Ethylene-responsive transcription factor 6 OS=Arabidopsis thaliana OX=3702 GN=ERF6 PE=1 SV=2	ethylene-responsive transcription factor 5-like [Aegilops tauschii subsp. tauschii]	biological process: cellular process (GO:0009987);; biological process: signaling (GO:0023052);; biological process: single-organism process (GO:0044699);; biological process: response to stimulus (GO:0050896);; biological process: biological regulation (GO:0065007);; molecular function: binding (GO:0005488);; molecular function: nucleic acid binding transcription factor activity (GO:0001071);; c…	MAPK signaling pathway - plant (ko04016);; Plant-pathogen interaction (ko04626)
	Unigene_187444	ERF7	0.281769	-1.29432	normal	9.07e-05	-3.64626	down	AP2 domain	Ethylene-responsive transcription factor 7 OS=Arabidopsis thaliana OX=3702 GN=ERF7 PE=1 SV=1	ethylene-responsive transcription factor 4 [Setaria italica]	molecular function: nucleic acid binding transcription factor activity (GO:0001071);; biological process: biological regulation (GO:0065007)	MAPK signaling pathway - plant (ko04016);; Plant-pathogen interaction (ko04626)
	Unigene_598818	ERF9	7.84555e-05	4.35273	up	1.83183e-05	3.76795	up	AP2 domain	Ethylene-responsive transcription factor 9 OS=Arabidopsis thaliana OX=3702 GN=ERF9 PE=1 SV=1	ethylene-responsive transcription factor 4-like [Panicum miliaceum]	molecular function: nucleic acid binding transcription factor activity (GO:0001071);; biological process: biological regulation (GO:0065007)	--
	Unigene_603901	ERN1	4.92206e-05	3.1509	up	6.45594e-05	4.12424	up	AP2 domain;; AP2 domain	Ethylene-responsive transcription factor ERN1 OS=Lotus japonicus OX=34305 GN=ERN1 PE=2 SV=1	hypothetical protein CFC21_072705 [Triticum aestivum]	biological process: response to stimulus (GO:0050896);; molecular function: binding (GO:0005488);; molecular function: nucleic acid binding transcription factor activity (GO:0001071);; biological process: biological regulation (GO:0065007);; cellular component: cell (GO:0005623);; cellular component: cell part (GO:0044464);; cellular component: organelle (GO:0043226);; biological process: multice…	MAPK signaling pathway - plant (ko04016);; Plant-pathogen interaction (ko04626)
	Unigene_591905	Os01g0141000	1.13528e-05	3.35142	up	--	--	--	B3 DNA binding domain	AP2/ERF and B3 domain-containing protein Os01g0141000 OS=Oryza sativa subsp. japonica OX=39947 GN=Os01g0141000 PE=2 SV=1	AP2/ERF and B3 domain-containing protein Os01g0141000-like isoform X1 [Aegilops tauschii subsp. tauschii]	molecular function: binding (GO:0005488)	MAPK signaling pathway - plant (ko04016);; Plant-pathogen interaction (ko04626)
	Unigene_314723	Os01g0693400	0.993334	-0.0112003	normal	0.000480447	2.40407	up	B3 DNA binding domain;; AP2 domain	AP2/ERF and B3 domain-containing protein Os01g0693400 OS=Oryza sativa subsp. japonica OX=39947 GN=Os01g0693400 PE=2 SV=1	hypothetical protein CFC21_041869 [Triticum aestivum]	biological process: reproduction (GO:0000003);; molecular function: binding (GO:0005488);; biological process: reproductive process (GO:0022414);; biological process: developmental process (GO:0032502);; molecular function: nucleic acid binding transcription factor activity (GO:0001071);; biological process: biological regulation (GO:0065007);; cellular component: cell (GO:0005623);; cellular com…	--
	Unigene_041267	Os05g0549800	0.898067	0.191559	normal	0.00173601	-4.32606	down	--	AP2/ERF and B3 domain-containing protein Os05g0549800 OS=Oryza sativa subsp. japonica OX=39947 GN=Os05g0549800 PE=2 SV=1	hypothetical protein CFC21_013521 [Triticum aestivum]	biological process: reproduction (GO:0000003);; molecular function: binding (GO:0005488);; biological process: reproductive process (GO:0022414);; biological process: developmental process (GO:0032502);; molecular function: nucleic acid binding transcription factor activity (GO:0001071);; biological process: biological regulation (GO:0065007);; cellular component: cell (GO:0005623);; cellular com…	--
	Unigene_002055	PLT1	0.0093402	1.71407	up	1.44e-10	2.66533	up	--	AP2-like ethylene-responsive transcription factor PLT1 OS=Arabidopsis thaliana OX=3702 GN=PLT1 PE=2 SV=1	unnamed protein product [Triticum turgidum subsp. durum]	--	--
	Unigene_007600	RAP2-12	0.981148	-0.038372	normal	1.08e-05	-4.87259	down	AP2 domain	Ethylene-responsive transcription factor RAP2-12 OS=Arabidopsis thaliana OX=3702 GN=RAP2-12 PE=1 SV=1	Ethylene-responsive transcription factor RAP2-3 [Hordeum vulgare]	molecular function: nucleic acid binding transcription factor activity (GO:0001071);; biological process: biological regulation (GO:0065007)	MAPK signaling pathway - plant (ko04016);; Plant-pathogen interaction (ko04626)
	Unigene_008513	RAP2-12	2.92e-05	-2.57918	down	0.000224285	-3.14941	down	AP2 domain	Ethylene-responsive transcription factor RAP2-12 OS=Arabidopsis thaliana OX=3702 GN=RAP2-12 PE=1 SV=1	Ethylene-responsive transcription factor RAP2-3 [Hordeum vulgare]	molecular function: nucleic acid binding transcription factor activity (GO:0001071);; biological process: biological regulation (GO:0065007)	MAPK signaling pathway - plant (ko04016);; Plant-pathogen interaction (ko04626)
	Unigene_598209	RAP2-12	0.840518	0.274788	normal	0.00657654	-4.15461	down	AP2 domain	Ethylene-responsive transcription factor RAP2-12 OS=Arabidopsis thaliana OX=3702 GN=RAP2-12 PE=1 SV=1	hypothetical protein CFC21_058952 [Triticum aestivum]	molecular function: nucleic acid binding transcription factor activity (GO:0001071);; biological process: biological regulation (GO:0065007)	--
	Unigene_027321	RAP2-13	0.0355849	-1.80274	normal	6.41e-12	-6.86579	down	AP2 domain	Ethylene-responsive transcription factor RAP2-13 OS=Arabidopsis thaliana OX=3702 GN=RAP2-13 PE=1 SV=1	predicted protein [Hordeum vulgare subsp. vulgare]	molecular function: nucleic acid binding transcription factor activity (GO:0001071);; biological process: biological regulation (GO:0065007)	MAPK signaling pathway - plant (ko04016);; Plant-pathogen interaction (ko04626)
	Unigene_069872	RAP2-2	0.00169362	-2.18579	down	0.0401222	-1.50985	normal	--	Ethylene-responsive transcription factor RAP2-2 OS=Arabidopsis thaliana OX=3702 GN=RAP2-2 PE=1 SV=2	unnamed protein product [Triticum turgidum subsp. durum]	--	--
	Unigene_516225	RAP2-2	0.0017428	-2.83018	down	1.47e-09	-6.93723	down	--	Ethylene-responsive transcription factor RAP2-2 OS=Arabidopsis thaliana OX=3702 GN=RAP2-2 PE=1 SV=2	dehydration-responsive element-binding protein 2D [Brachypodium distachyon]	--	--
	Unigene_604361	RAP2-4	0.00321367	3.73573	up	--	--	--	AP2 domain	Ethylene-responsive transcription factor RAP2-4 OS=Arabidopsis thaliana OX=3702 GN=RAP2-4 PE=1 SV=1	ethylene-responsive transcription factor RAP2-4-like [Aegilops tauschii subsp. tauschii]	molecular function: nucleic acid binding transcription factor activity (GO:0001071);; biological process: biological regulation (GO:0065007)	--
	Unigene_321341	RAP2-4	0.652378	0.407246	normal	9.37e-05	1.00829	up	AP2 domain	Ethylene-responsive transcription factor RAP2-4 OS=Arabidopsis thaliana OX=3702 GN=RAP2-4 PE=1 SV=1	DBF2 protein [Aegilops biuncialis]	molecular function: nucleic acid binding transcription factor activity (GO:0001071);; biological process: biological regulation (GO:0065007);; biological process: response to stimulus (GO:0050896)	--
	Unigene_316762	RAP2-9	4.1e-05	3.29085	up	2.66e-12	3.80527	up	AP2 domain	Ethylene-responsive transcription factor RAP2-9 OS=Arabidopsis thaliana OX=3702 GN=RAP2-9 PE=2 SV=1	predicted protein [Hordeum vulgare subsp. vulgare]	biological process: response to stimulus (GO:0050896);; molecular function: nucleic acid binding transcription factor activity (GO:0001071);; biological process: biological regulation (GO:0065007)	--
E2FA	Unigene_067367	E2FA	8.73e-06	3.00605	up	4.08e-16	4.356	up	E2F transcription factor CC-MB domain;; E2F/DP family winged-helix DNA-binding domain	Transcription factor E2FA OS=Arabidopsis thaliana OX=3702 GN=E2FA PE=1 SV=1	unnamed protein product [Triticum turgidum subsp. durum]	biological process: cellular process (GO:0009987);; biological process: developmental process (GO:0032502);; biological process: single-organism process (GO:0044699);; biological process: cellular component organization or biogenesis (GO:0071840);; molecular function: binding (GO:0005488);; molecular function: nucleic acid binding transcription factor activity (GO:0001071);; biological process: b…	--
	Unigene_324172	E2FA	0.0422256	1.28769	normal	6.67e-05	1.50959	up	E2F transcription factor CC-MB domain;; E2F/DP family winged-helix DNA-binding domain;; Protein of unknown function (DUF1279)	Transcription factor E2FA OS=Arabidopsis thaliana OX=3702 GN=E2FA PE=1 SV=1	transcription factor E2FA-like isoform X1 [Aegilops tauschii subsp. tauschii]	biological process: cellular process (GO:0009987);; biological process: developmental process (GO:0032502);; biological process: single-organism process (GO:0044699);; biological process: cellular component organization or biogenesis (GO:0071840);; molecular function: binding (GO:0005488);; molecular function: nucleic acid binding transcription factor activity (GO:0001071);; biological process: b…	--
NAC	Unigene_578190	NAM-B1	0.00231873	2.8527	up	8.29e-05	2.54747	up	No apical meristem (NAM) protein	NAC transcription factor NAM-B1 OS=Hordeum vulgare subsp. spontaneum OX=77009 GN=NAM-B1 PE=4 SV=1	NAC transcription factor [Hordeum vulgare]	biological process: reproduction (GO:0000003);; biological process: response to stimulus (GO:0050896);; biological process: reproductive process (GO:0022414);; biological process: developmental process (GO:0032502);; molecular function: binding (GO:0005488);; molecular function: nucleic acid binding transcription factor activity (GO:0001071);; biological process: biological regulation (GO:0065007…	--
	Unigene_178410	NAM-B2	9.34353e-05	4.03241	up	5.98e-07	4.25957	up	No apical meristem (NAM) protein	NAC transcription factor NAM-B2 OS=Triticum turgidum subsp. durum OX=4567 GN=NAM-B2 PE=2 SV=1	hypothetical protein CFC21_034015 [Triticum aestivum]	biological process: reproduction (GO:0000003);; biological process: response to stimulus (GO:0050896);; biological process: reproductive process (GO:0022414);; biological process: developmental process (GO:0032502);; molecular function: binding (GO:0005488);; molecular function: nucleic acid binding transcription factor activity (GO:0001071);; biological process: biological regulation (GO:0065007…	--
HSF	Unigene_599576	HSFA2B	0.00116853	-2.45756	down	0.000382687	-2.52791	down	HSF-type DNA-binding	Heat stress transcription factor A-2b OS=Oryza sativa subsp. japonica OX=39947 GN=HSFA2B PE=2 SV=1	unnamed protein product [Triticum turgidum subsp. durum]	molecular function: nucleic acid binding transcription factor activity (GO:0001071);; biological process: biological regulation (GO:0065007);; cellular component: cell (GO:0005623);; cellular component: organelle (GO:0043226);; cellular component: cell part (GO:0044464);; biological process: response to stimulus (GO:0050896);; molecular function: binding (GO:0005488)	--
	Unigene_068166	HSFA2D	0.000309303	-2.577	down	7.05e-07	-4.5767	down	--	Heat stress transcription factor A-2d OS=Oryza sativa subsp. japonica OX=39947 GN=HSFA2D PE=2 SV=2	predicted protein, partial [Hordeum vulgare subsp. vulgare]	molecular function: nucleic acid binding transcription factor activity (GO:0001071);; biological process: biological regulation (GO:0065007);; biological process: response to stimulus (GO:0050896)	--
	Unigene_589379	HSFA2D	0.00230628	-2.16906	down	2.59e-05	-5.12613	down	--	Heat stress transcription factor A-2d OS=Oryza sativa subsp. japonica OX=39947 GN=HSFA2D PE=2 SV=2	predicted protein, partial [Hordeum vulgare subsp. vulgare]	molecular function: nucleic acid binding transcription factor activity (GO:0001071);; biological process: biological regulation (GO:0065007);; biological process: response to stimulus (GO:0050896)	--
	Unigene_170018	HSFA2E	0.0519885	2.13413	normal	0.0053716	2.34119	up	HSF-type DNA-binding	Heat stress transcription factor A-2e OS=Oryza sativa subsp. japonica OX=39947 GN=HSFA2E PE=2 SV=1	Heat stress transcription factor A-2e [Hordeum vulgare]	molecular function: nucleic acid binding transcription factor activity (GO:0001071);; biological process: biological regulation (GO:0065007);; cellular component: cell (GO:0005623);; cellular component: organelle (GO:0043226);; cellular component: cell part (GO:0044464);; biological process: response to stimulus (GO:0050896);; molecular function: binding (GO:0005488)	--
	Unigene_065003	HSFA3	9.94e-08	5.26606	up	1.71e-11	6.30609	up	--	Heat stress transcription factor A-3 OS=Oryza sativa subsp. japonica OX=39947 GN=HSFA3 PE=2 SV=1	heat stress transcription factor A-3 isoform X3 [Brachypodium distachyon]	molecular function: binding (GO:0005488);; molecular function: nucleic acid binding transcription factor activity (GO:0001071);; biological process: biological regulation (GO:0065007);; cellular component: cell (GO:0005623);; cellular component: cell part (GO:0044464);; cellular component: organelle (GO:0043226);; biological process: response to stimulus (GO:0050896)	--
	Unigene_514963	HSFA6A	0.0176503	-3.15254	normal	0.00738278	-3.32501	down	FBD;; HSF-type DNA-binding	Putative heat stress transcription factor A-6a OS=Oryza sativa subsp. japonica OX=39947 GN=HSFA6A PE=3 SV=1	uncharacterized protein LOC100827637 [Brachypodium distachyon]	molecular function: nucleic acid binding transcription factor activity (GO:0001071);; biological process: biological regulation (GO:0065007);; cellular component: cell (GO:0005623);; cellular component: organelle (GO:0043226);; cellular component: cell part (GO:0044464);; molecular function: binding (GO:0005488)	--
	Unigene_176440	HSFB2B	3.77e-05	4.08881	up	1.33e-07	4.59815	up	--	Heat stress transcription factor B-2b OS=Oryza sativa subsp. japonica OX=39947 GN=HSFB2B PE=2 SV=1	hypothetical protein CFC21_102711 [Triticum aestivum]	--	--
	Unigene_023022	HSFC1B	0.000979879	2.873	up	2.26e-08	3.9305	up	HSF-type DNA-binding	Heat stress transcription factor C-1b OS=Oryza sativa subsp. japonica OX=39947 GN=HSFC1B PE=2 SV=1	heat shock factor C1b [Triticum aestivum]	biological process: response to stimulus (GO:0050896);; molecular function: nucleic acid binding transcription factor activity (GO:0001071);; biological process: biological regulation (GO:0065007);; cellular component: cell (GO:0005623);; cellular component: cell part (GO:0044464);; cellular component: organelle (GO:0043226);; molecular function: binding (GO:0005488)	--
	Unigene_318302	HSFC2A	8.73e-05	3.32604	up	4.43e-10	4.76411	up	Remorin, C-terminal region	Heat stress transcription factor C-2a OS=Oryza sativa subsp. japonica OX=39947 GN=HSFC2A PE=2 SV=1	uncharacterized protein LOC100834817 [Brachypodium distachyon]	--	--
	Unigene_511060	HSFC2A	0.0478964	2.33987	normal	1.3e-07	4.61259	up	--	Heat stress transcription factor C-2a OS=Oryza sativa subsp. japonica OX=39947 GN=HSFC2A PE=2 SV=1	heat stress transcription factor C-2a [Brachypodium distachyon]	--	--
	Unigene_522325	HSFC2B	0.0181844	-2.34485	normal	0.000143564	-4.91923	down	HSF-type DNA-binding	Heat stress transcription factor C-2b OS=Oryza sativa subsp. japonica OX=39947 GN=HSFC2B PE=3 SV=1	heat shock factor C2b, partial [Hordeum vulgare subsp. vulgare]	molecular function: nucleic acid binding transcription factor activity (GO:0001071);; biological process: biological regulation (GO:0065007);; cellular component: cell (GO:0005623);; cellular component: organelle (GO:0043226);; cellular component: cell part (GO:0044464);; molecular function: binding (GO:0005488)	--
C2C2-Dof	Unigene_599319	DOF4	0.00276013	2.68603	up	1.01e-10	3.68787	up	Dof domain, zinc finger	Dof zinc finger protein 4 OS=Oryza sativa subsp. japonica OX=39947 GN=DOF4 PE=2 SV=1	unnamed protein product [Triticum turgidum subsp. durum]	molecular function: binding (GO:0005488);; molecular function: nucleic acid binding transcription factor activity (GO:0001071);; biological process: biological regulation (GO:0065007)	--
	Unigene_044674	DOF4	0.0585371	1.48357	normal	3.61e-06	2.19949	up	Dof domain, zinc finger	Dof zinc finger protein 4 OS=Oryza sativa subsp. japonica OX=39947 GN=DOF4 PE=2 SV=1	dof zinc finger protein 8 [Hordeum vulgare]	molecular function: binding (GO:0005488);; molecular function: nucleic acid binding transcription factor activity (GO:0001071);; biological process: biological regulation (GO:0065007)	--
	Unigene_326108	DOF5	0.0416104	2.32011	normal	0.00621483	2.76711	up	Dof domain, zinc finger	Dof zinc finger protein 5 OS=Oryza sativa subsp. japonica OX=39947 GN=DOF5 PE=2 SV=1	dof zinc finger protein 17 [Hordeum vulgare subsp. vulgare]	molecular function: binding (GO:0005488);; biological process: biological regulation (GO:0065007)	Circadian rhythm - plant (ko04712)
C2H2	Unigene_598795	SAP16	0.0627833	-2.19985	normal	0.00389892	-3.28348	down	AN1-like Zinc finger	Zinc finger AN1 and C2H2 domain-containing stress-associated protein 16 OS=Oryza sativa subsp. japonica OX=39947 GN=SAP16 PE=2 SV=2	predicted protein [Hordeum vulgare subsp. vulgare]	molecular function: binding (GO:0005488)	--
	Unigene_603215	STOP1	0.00191455	-3.36762	down	0.0040111	-3.50142	down	Zinc finger, C2H2 type;; Zinc-finger of C2H2 type	Protein SENSITIVE TO PROTON RHIZOTOXICITY 1 OS=Arabidopsis thaliana OX=3702 GN=STOP1 PE=2 SV=1	hypothetical protein CFC21_074793 [Triticum aestivum]	molecular function: binding (GO:0005488)	Various types of N-glycan biosynthesis (ko00513)

## Sheet: Co-induced
TF familiy	ID	Gene name	R0_vs_R3_DESeq2_FDR	R0_vs_R3_DESeq2_log2FC	R0_vs_R3_regulated	R0_vs_R6_DESeq2_FDR	R0_vs_R6_DESeq2_log2FC	R0_vs_R6_regulated	S0_vs_S3_DESeq2_FDR	S0_vs_S3_DESeq2_log2FC	S0_vs_S3_regulated	S0_vs_S6_DESeq2_FDR	S0_vs_S6_DESeq2_log2FC	S0_vs_S6_DESeq2_(FDR_0.01_FC_2)_regulated	L0_vs_L3_DESeq2_FDR	L0_vs_L3_DESeq2_log2FC	L0_vs_L3_regulated	L0_vs_L2_DESeq2_FDR	L0_vs_L6_DESeq2_log2FC	L0_vs_L6_regulated	Pfam_annotation	Swissprot_annotation	TrEMBL_annotation	nr_annotation	GO_second_level_annotation	KEGG_pathway_annotation
bHLH	Unigene_521396	BHLH30	0.00538473	4.04601	up	0.666368	0.485123	normal	0.566762	-1.01463	normal	7.14975e-05	-4.40314	down	0.0081162	-3.4838	down	0.0056559	-3.0271	down	Helix-loop-helix DNA-binding domain	Transcription factor bHLH30 OS=Arabidopsis thaliana OX=3702 GN=BHLH30 PE=1 SV=1	BHLH domain-containing protein OS=Triticum turgidum subsp. durum OX=4567 GN=TRITD_3Av1G056560 PE=3 SV=1	hypothetical protein CFC21_034691 [Triticum aestivum]	molecular function: binding (GO:0005488)	--
	Unigene_189089	BHLH35	0.00402725	3.52796	up	0.36861	1.14622	normal	4.51378e-12	-9.33677	down	0.000944619	-4.07913	down	5.6829e-06	-7.53153	down	0.175334	-1.76702	normal	Helix-loop-helix DNA-binding domain	Transcription factor bHLH35 OS=Arabidopsis thaliana OX=3702 GN=BHLH35 PE=2 SV=1	BHLH domain-containing protein OS=Aegilops tauschii subsp. strangulata OX=200361 PE=3 SV=1	unnamed protein product [Triticum turgidum subsp. durum]	molecular function: nucleic acid binding transcription factor activity (GO:0001071);; biological process: biological regulation (GO:0065007);; molecular function: binding (GO:0005488)	MAPK signaling pathway - plant (ko04016);; Plant hormone signal transduction (ko04075)
	Unigene_596158	BHLH35	5.99277e-05	5.66185	up	0.0315475	3.08515	normal	3.38446e-10	-6.95432	down	0.0122158	-3.48171	normal	3.13323e-07	-7.88506	down	0.431278	-1.18304	normal	Helix-loop-helix DNA-binding domain	Transcription factor bHLH35 OS=Arabidopsis thaliana OX=3702 GN=BHLH35 PE=2 SV=1	BHLH domain-containing protein OS=Aegilops tauschii subsp. strangulata OX=200361 PE=3 SV=1	unnamed protein product [Triticum turgidum subsp. durum]	molecular function: nucleic acid binding transcription factor activity (GO:0001071);; biological process: biological regulation (GO:0065007);; molecular function: binding (GO:0005488)	MAPK signaling pathway - plant (ko04016);; Plant hormone signal transduction (ko04075)
	Unigene_512708	MYC2	0.00057693	4.72256	up	0.0344755	2.85925	normal	4.80051e-05	-4.53419	down	0.0292204	-2.96673	normal	0.00339257	-2.93587	down	0.710158	-0.479739	normal	bHLH-MYC and R2R3-MYB transcription factors N-terminal	Transcription factor MYC2 OS=Oryza sativa subsp. japonica OX=39947 GN=MYC2 PE=1 SV=1	BHLH domain-containing protein OS=Brachypodium distachyon OX=15368 GN=100836477 PE=3 SV=1	transcription factor MYC2 [Brachypodium distachyon]	biological process: response to stimulus (GO:0050896);; molecular function: binding (GO:0005488);; molecular function: nucleic acid binding transcription factor activity (GO:0001071);; biological process: biological regulation (GO:0065007);; cellular component: cell (GO:0005623);; cellular component: cell part (GO:0044464);; cellular component: organelle (GO:0043226);; biological process: metabol…	MAPK signaling pathway - plant (ko04016);; Plant hormone signal transduction (ko04075)
	Unigene_022901	MYC2	0.000228191	5.42018	up	0.0459256	3.1108	normal	0.000226182	-4.57342	down	0.0363001	-3.13005	normal	5.61326e-05	-4.8229	down	0.694061	-0.512104	normal	Helix-loop-helix DNA-binding domain	Transcription factor MYC2 OS=Oryza sativa subsp. japonica OX=39947 GN=MYC2 PE=1 SV=1	BHLH domain-containing protein OS=Triticum turgidum subsp. durum OX=4567 GN=TRITD_1Av1G126650 PE=3 SV=1	unnamed protein product [Triticum turgidum subsp. durum]	biological process: response to stimulus (GO:0050896);; molecular function: binding (GO:0005488);; molecular function: nucleic acid binding transcription factor activity (GO:0001071);; biological process: biological regulation (GO:0065007);; cellular component: cell (GO:0005623);; cellular component: cell part (GO:0044464);; cellular component: organelle (GO:0043226);; biological process: metabol…	MAPK signaling pathway - plant (ko04016);; Plant hormone signal transduction (ko04075)
AP2/ERF	Unigene_197025	EREBP1	2.05635e-07	7.93022	up	--	--	--	0.00150278	-4.20123	down	0.154173	-2.3452	normal	0.00024608	-4.26784	down	0.925747	0.146937	normal	AP2 domain	Ethylene-responsive transcription factor 1 OS=Oryza sativa subsp. japonica OX=39947 GN=EREBP1 PE=1 SV=1	AP2/ERF domain-containing protein OS=Hordeum vulgare subsp. vulgare OX=112509 PE=4 SV=1	Ethylene-responsive transcription factor RAP2-3 [Hordeum vulgare]	molecular function: nucleic acid binding transcription factor activity (GO:0001071);; biological process: biological regulation (GO:0065007)	--
	Unigene_518350	ERF2	0.000836551	4.40048	up	0.0783133	2.20148	normal	6.03697e-06	-5.04974	down	7.75136e-05	-3.87811	down	3.22023e-09	-5.68535	down	0.00537285	-2.66426	down	AP2 domain	Ethylene-responsive transcription factor 2 OS=Nicotiana sylvestris OX=4096 GN=ERF2 PE=2 SV=1	Ethylene-responsive factor OS=Thinopyrum intermedium OX=85679 GN=ERF1 PE=2 SV=1	ethylene-responsive factor [Thinopyrum intermedium]	biological process: cellular process (GO:0009987);; biological process: signaling (GO:0023052);; biological process: single-organism process (GO:0044699);; biological process: response to stimulus (GO:0050896);; biological process: biological regulation (GO:0065007);; biological process: immune system process (GO:0002376);; molecular function: nucleic acid binding transcription factor activity (G…	--
	Unigene_064917	ERF4	0.000245309	5.17606	up	0.0429444	3.01829	normal	0.000315783	-3.9302	down	0.0133391	-2.87444	normal	2.83053e-11	-6.80909	down	0.296001	-1.11381	normal	AP2 domain	Ethylene-responsive transcription factor 4 OS=Arabidopsis thaliana OX=3702 GN=ERF4 PE=1 SV=1	Predicted protein OS=Hordeum vulgare subsp. vulgare OX=112509 PE=2 SV=1	ethylene-responsive factor-like transcription factor ERFL2b [Hordeum vulgare]	molecular function: nucleic acid binding transcription factor activity (GO:0001071);; biological process: biological regulation (GO:0065007)	--
	Unigene_597634	ERF4	0.00195483	4.26006	up	0.149051	2.45559	normal	0.00529487	-3.46884	down	0.138671	-2.62304	normal	1.23059e-06	-7.28308	down	0.594527	-0.78951	normal	--	Ethylene-responsive transcription factor 4 OS=Arabidopsis thaliana OX=3702 GN=ERF4 PE=1 SV=1	Ethylene-responsive transcription factor 3 OS=Agropyron mongolicum OX=37717 GN=AmERF3 PE=2 SV=1	ethylene-responsive transcription factor 3 [Agropyron mongolicum]	--	--
	Unigene_008513	RAP2-12	0.000445704	4.99963	up	0.332678	1.23551	normal	0.00237079	-3.3075	down	0.00272687	-3.28005	down	0.000224285	-3.14941	down	2.91928e-05	-2.57918	down	AP2 domain	Ethylene-responsive transcription factor RAP2-12 OS=Arabidopsis thaliana OX=3702 GN=RAP2-12 PE=1 SV=1	AP2/ERF domain-containing protein OS=Hordeum vulgare subsp. vulgare OX=112509 PE=4 SV=1	Ethylene-responsive transcription factor RAP2-3 [Hordeum vulgare]	molecular function: nucleic acid binding transcription factor activity (GO:0001071);; biological process: biological regulation (GO:0065007)	--
WRKY	Unigene_518241	WRKY41	0.000504311	4.64799	up	0.059374	2.40816	normal	4.43273e-09	-5.62076	down	8.47446e-05	-4.57036	down	1.82981e-10	-6.4422	down	0.0230347	-2.13667	normal	WRKY DNA -binding domain;; WRKY DNA -binding domain	Probable WRKY transcription factor 41 OS=Arabidopsis thaliana OX=3702 GN=WRKY41 PE=1 SV=2	Drought resistance protein OS=Agropyron mongolicum OX=37717 GN=WRKY9 PE=2 SV=1	drought resistance protein [Agropyron mongolicum]	biological process: response to stimulus (GO:0050896);; biological process: immune system process (GO:0002376);; molecular function: binding (GO:0005488);; molecular function: nucleic acid binding transcription factor activity (GO:0001071);; biological process: biological regulation (GO:0065007);; cellular component: cell (GO:0005623);; cellular component: cell part (GO:0044464);; cellular compon…	--
	Unigene_519180	WRKY46	4.897e-07	7.49917	up	--	--	--	0.169507	-2.00615	normal	0.000260074	-3.1889	down	0.000147171	-5.40487	down	0.000198056	-5.15997	down	WRKY DNA -binding domain	Probable WRKY transcription factor 46 OS=Arabidopsis thaliana OX=3702 GN=WRKY46 PE=1 SV=1	Uncharacterized protein OS=Aegilops tauschii subsp. strangulata OX=200361 PE=4 SV=1	putative WRKY transcription factor 46 [Hordeum vulgare]	molecular function: nucleic acid binding transcription factor activity (GO:0001071);; biological process: biological regulation (GO:0065007);; molecular function: binding (GO:0005488)	Plant-pathogen interaction (ko04626)
	Unigene_509435	WRKY50	0.00115274	4.75558	up	--	--	--	8.9781e-07	-6.02857	down	0.00367107	-4.16703	down	8.81611e-13	-8.66151	down	9.61864e-05	-3.05562	down	WRKY DNA -binding domain	Probable WRKY transcription factor 50 OS=Arabidopsis thaliana OX=3702 GN=WRKY50 PE=2 SV=1	WRKY1 OS=Lolium perenne OX=4522 PE=2 SV=1	WRKY1 [Lolium perenne]	molecular function: nucleic acid binding transcription factor activity (GO:0001071);; biological process: biological regulation (GO:0065007);; molecular function: binding (GO:0005488)	MAPK signaling pathway - plant (ko04016);; Plant-pathogen interaction (ko04626)
	Unigene_312354	WRKY51	0.00868998	3.66533	up	0.056868	2.23802	normal	0.0167306	-2.61444	normal	0.00395609	-2.4942	down	0.00379648	-2.6558	down	0.653213	-0.60941	normal	Plant zinc cluster domain	WRKY transcription factor WRKY51 OS=Oryza sativa subsp. japonica OX=39947 GN=WRKY51 PE=1 SV=1	WRKY domain-containing protein OS=Aegilops tauschii subsp. strangulata OX=200361 PE=4 SV=1	WRKY9 transcription factor, partial [Triticum aestivum]	--	--
	Unigene_513209	WRKY51	0.000271227	5.40403	up	0.1647	2.05939	normal	0.00224529	-3.56758	down	4.6874e-07	-4.50961	down	0.000834899	-4.12536	down	0.152111	-1.69464	normal	WRKY DNA -binding domain;; Plant zinc cluster domain	WRKY transcription factor WRKY51 OS=Oryza sativa subsp. japonica OX=39947 GN=WRKY51 PE=1 SV=1	WRKY domain-containing protein OS=Triticum turgidum subsp. durum OX=4567 GN=TRITD_2Bv1G132770 PE=4 SV=1	hypothetical protein CFC21_023484 [Triticum aestivum]	biological process: response to stimulus (GO:0050896);; molecular function: binding (GO:0005488);; molecular function: nucleic acid binding transcription factor activity (GO:0001071);; biological process: biological regulation (GO:0065007)	MAPK signaling pathway - plant (ko04016);; Plant-pathogen interaction (ko04626)
	Unigene_007295	WRKY53	0.000746352	3.75553	up	0.0861155	1.73205	normal	0.13602	-2.003	normal	0.00223825	-2.32895	down	0.000239942	-2.98127	down	0.0785598	-1.52795	normal	WRKY DNA -binding domain	Probable WRKY transcription factor 53 OS=Arabidopsis thaliana OX=3702 GN=WRKY53 PE=1 SV=1	Predicted protein OS=Hordeum vulgare subsp. vulgare OX=112509 PE=2 SV=1	predicted protein [Hordeum vulgare subsp. vulgare]	molecular function: nucleic acid binding transcription factor activity (GO:0001071);; biological process: biological regulation (GO:0065007);; molecular function: binding (GO:0005488)	Plant-pathogen interaction (ko04626)
	Unigene_173279	WRKY53	0.000415545	4.86871	up	0.0540091	2.7623	normal	2.88553e-08	-6.68786	down	1.66624e-07	-4.9553	down	2.72667e-08	-6.65703	down	0.00692096	-2.45849	down	WRKY DNA -binding domain	Probable WRKY transcription factor 53 OS=Arabidopsis thaliana OX=3702 GN=WRKY53 PE=1 SV=1	Drought resistance protein OS=Agropyron mongolicum OX=37717 GN=WRKY9 PE=2 SV=1	drought resistance protein [Agropyron mongolicum]	biological process: response to stimulus (GO:0050896);; biological process: immune system process (GO:0002376);; molecular function: binding (GO:0005488);; molecular function: nucleic acid binding transcription factor activity (GO:0001071);; biological process: biological regulation (GO:0065007);; cellular component: cell (GO:0005623);; cellular component: cell part (GO:0044464);; cellular compon…	Plant-pathogen interaction (ko04626)
	Unigene_521035	WRKY65	0.00934018	3.41714	up	0.132322	2.12397	normal	0.156133	-1.8543	normal	0.00501213	-3.38261	down	0.000150124	-3.66986	down	0.908687	-0.172754	normal	WRKY DNA -binding domain	Probable WRKY transcription factor 65 OS=Arabidopsis thaliana OX=3702 GN=WRKY65 PE=2 SV=1	Predicted protein (Fragment) OS=Hordeum vulgare subsp. vulgare OX=112509 PE=2 SV=1	predicted protein, partial [Hordeum vulgare subsp. vulgare]	molecular function: nucleic acid binding transcription factor activity (GO:0001071);; biological process: biological regulation (GO:0065007);; molecular function: binding (GO:0005488)	MAPK signaling pathway - plant (ko04016);; Plant-pathogen interaction (ko04626)
	Unigene_512949	WRKY70	6.08012e-06	6.9651	up	--	--	--	3.79395e-06	-6.00265	down	0.000945857	-4.32002	down	1.82332e-14	-11.0347	down	0.00107811	-2.88599	down	WRKY DNA -binding domain	WRKY DNA-binding transcription factor 70 OS=Solanum lycopersicum OX=4081 GN=WRKY70 PE=2 SV=1	WRKY domain-containing protein OS=Triticum aestivum OX=4565 PE=4 SV=1	WRKY transcription factor 146 [Triticum aestivum]	biological process: response to stimulus (GO:0050896);; biological process: immune system process (GO:0002376);; biological process: biological regulation (GO:0065007);; molecular function: nucleic acid binding transcription factor activity (GO:0001071);; biological process: cellular process (GO:0009987);; biological process: signaling (GO:0023052);; biological process: single-organism process (G…	Plant-pathogen interaction (ko04626)
	Unigene_065706	WRKY71	0.000504311	5.18139	up	0.0870039	2.74839	normal	3.93732e-07	-5.83025	down	0.0051715	-4.31786	down	2.60996e-10	-7.70971	down	0.380187	-1.05899	normal	WRKY DNA -binding domain	WRKY transcription factor WRKY71 OS=Oryza sativa subsp. indica OX=39946 GN=WRKY71 PE=1 SV=1	WRKY4 transcription factor (Fragment) OS=Stipa purpurea OX=481984 PE=2 SV=1	WRKY4 transcription factor, partial [Stipa purpurea]	molecular function: nucleic acid binding transcription factor activity (GO:0001071);; biological process: biological regulation (GO:0065007);; molecular function: binding (GO:0005488)	Plant-pathogen interaction (ko04626)
HSF	Unigene_023022	HSFC1B	0.125341	-2.03834	normal	3.62406e-06	-3.05471	down	4.68244e-05	5.61541	up	--	--	--	2.26481e-08	3.9305	up	0.000979879	2.873	up	HSF-type DNA-binding	Heat stress transcription factor C-1b OS=Oryza sativa subsp. japonica OX=39947 GN=HSFC1B PE=2 SV=1	Heat shock factor C1b OS=Triticum aestivum OX=4565 GN=HsfC1b PE=2 SV=1	heat shock factor C1b [Triticum aestivum]	biological process: response to stimulus (GO:0050896);; molecular function: nucleic acid binding transcription factor activity (GO:0001071);; biological process: biological regulation (GO:0065007);; cellular component: cell (GO:0005623);; cellular component: cell part (GO:0044464);; cellular component: organelle (GO:0043226);; molecular function: binding (GO:0005488)	--
bZIP	Unigene_515127	RISBZ5	8.02902e-07	5.43468	up	--	--	--	0.471716	-1.04519	normal	1.95476e-06	-4.62535	down	2.69928e-08	-5.55267	down	9.27034e-06	-3.79032	down	bZIP transcription factor;; Basic leucine-zipper C terminal	bZIP transcription factor RISBZ5 OS=Oryza sativa subsp. japonica OX=39947 GN=RISBZ5 PE=2 SV=1	BZIP domain-containing protein OS=Brachypodium distachyon OX=15368 GN=100825273 PE=4 SV=1	hypothetical protein BRADI_1g31700v3 [Brachypodium distachyon]	molecular function: nucleic acid binding transcription factor activity (GO:0001071);; biological process: biological regulation (GO:0065007)	--
MYB	Unigene_519155	MYB4	0.000528974	4.89717	up	0.057358	3.00616	normal	0.00602236	-3.41794	down	0.0155398	-3.54082	normal	0.00235882	-4.91852	down	0.614557	-0.635247	normal	Myb-like DNA-binding domain	Transcription factor MYB4 OS=Oryza sativa subsp. japonica OX=39947 GN=MYB4 PE=2 SV=2	MYB-related protein OS=Triticum aestivum OX=4565 PE=2 SV=1	MYB-related protein [Triticum aestivum]	--	--
