# Supplementary material for: Tissue-Specific Transcriptomic Analysis Reveals the Response Mechanism of Cold Stress in Poa crymophila, a Native Grass in Qinghai-Tibet Plateau
Source: Preprints.org preprint supplement (doi:10.20944/preprints202311.0336.v1), 2023-11-06
Supplement: Supplementary file 21 [file Table S7 Differently expressed genes related to CBF pathway.xlsx]

## Sheet: Sheet1
Table S7 Differently expressed genes related to CBF pathway.
Code	Description	Gene Id	Name	Root-CBF pathway						Stem-CBF pathway						Leaf-CBF pathway
				R0_vs_R3			R0_vs_R6			S0_vs_S3			S0_vs_S6			L0_vs_L3			L0_vs_L6
				DESeq2_FDR	DESeq2_log2FC	regulated	DESeq2_FDR	DESeq2_log2FC	regulated	DESeq2_FDR	DESeq2_log2FC	regulated	DESeq2_FDR	DESeq2_log2FC	regulated	DESeq2_FDR	DESeq2_log2FC	regulated	DESeq2_FDR	DESeq2_log2FC	regulated
1	Dehydration-responsive element-binding protein (DREB/CBF)	Unigene_316638	DREB1A/CBF3	0.0860887	2.93655	normal	0.00238365	4.55306	up	7.61938e-07	-7.66755	down	0.266783	-2.06132	normal	0.860887	2.9789	normal	0.00239867	5.61502	up
2		Unigene_448266	DREB1A/CBF3	0.122016	2.44985	normal	0.000135117	5.76288	up	6.39455e-06	-6.56257	down	0.258413	-2.08672	normal	0.122016	2.93338	normal	0.000129918	6.58763	up
3		Unigene_508734	DREB1C/CBF2	0.425706	1.42832	normal	0.00128936	4.99724	up	0.00104083	-6.52739	down	0.159789	-2.18503	normal	0.425706	1.42363	normal	0.00116863	5.99722	up
4		Unigene_520870	DREB2B	0.565983	0.815142	normal	0.00724102	3.69612	up	——	——	——	——	——	——	0.209307	-0.975655	normal	0.0019827	-1.81123	down
5		Unigene_194941	DREB2B	0.0308317	2.80601	normal	0.00019623	5.2662	up	——	——	——	——	——	——	0.0308317	2.80601	normal	0.00019623	5.2662	up
6		Unigene_587995	DREB1H	0.460208	1.06053	normal	0.00119811	4.10046	up	——	——	——	——	——	——	0.460208	1.06053	normal	0.00119811	4.10046	up
7		Unigene_496410	DREB1E	——	——	——	——	——	——	2.68936e-05	-7.72443	down	0.0323464	-3.27498	normal	——	——	——	——	——	——
8		Unigene_522896	DREB1G	——	——	——	——	——	——	0.00642791	-3.30386	down	0.0181078	-2.61435	normal	——	——	——	——	——	——
9		Unigene_316940	DREB2B	——	——	——	——	——	——	0.00151861	3.98664	up	0.0110795	3.0877	normal	——	——	——	——	——	——
10	transcription factor ICE1	Unigene_518959	SCRM	——	——	——	——	——	——	——	——	——	6.15252e-09	7.97475	up	0.000322236	3.01891	up	0.000737403	2.63768	up
11		Unigene_005865	SCRM	——	——	——	——	——	——	——	——	——	——	——	——	0.0518266	-1.67352	normal	1.38e-06	-4.30518	down
12	Cold shock protein (CSP)	Unigene_509145	CS66	0.00232567	3.14046	up	0.000117809	5.65596	up	——	——	——	——	——	——	——	——	——	——	——	——
13		Unigene_588502	CS66	——	——	——	——	——	——	——	——	——	6.15252e-09	7.97475	up	——	——	——	——	——	——
14		Unigene_307424	CS66	——	——	——	——	——	——	——	——	——	——	——	——	7.21e-10	7.19865	up	4.67e-10	9.2322	up
15		Unigene_513166	CS120	——	——	——	——	——	——	——	——	——	——	——	——	3.52e-20	7.945	up	2.02e-27	10.2031	up
16	Dehydrin COR410	Unigene_515514	COR410	0.000181646	-2.14702	down	0.289944	-1.38042	normal	8.80893e-09	5.66933	up	0.00112834	3.44116	up	1.53e-11	4.30324	up	3.76e-30	6.6275	up
17		Unigene_029692	COR410	——	——	——	——	——	——	——	——	——	1.02228e-11	10.0321	up	1.96e-14	4.95118	up	8.93e-32	7.13008	up
18		Unigene_060275	COR410	——	——	——	——	——	——	——	——	——	——	——	——	0.00415522	2.36447	up	0.273512	-1.86883	normal
19	Cold acclimation protein WCOR413	Unigene_003315	COR413PM1	0.685768	-0.354054	normal	0.000130887	-4.21096	down	——	——	——	1.3611e-11	11.6044	up	3.85e-10	3.54151	up	5.9e-56	5.08509	up
20		Unigene_003317	COR413PM1	——	——	——	——	——	——	0.0012331	3.96527	up	0.0378294	2.70938	normal	3.64e-10	4.00092	up	7.59e-20	4.97239	up
21		Unigene_199370	COR413PM1	——	——	——	——	——	——	0.00668914	2.47602	up	0.0247644	1.6604	normal	2.45e-05	2.29722	up	1.88e-09	2.90383	up
22		Unigene_592073	COR413PM1	——	——	——	——	——	——	0.00499186	2.70939	up	0.0268021	1.87865	normal	1.12e-05	3.02545	up	1.28e-06	3.70246	up
23		Unigene_525840	COR413IM2	——	——	——	——	——	——	0.00290098	3.39102	up	0.18832	1.80133	normal	0.00313246	2.50869	up	0.0259024	1.39789	normal
24		Unigene_442211	COR413PM1	——	——	——	——	——	——	——	——	——	——	——	——	0.276781	0.742087	normal	2.02e-09	1.88279	up
25		Unigene_179232	COR413PM1	——	——	——	——	——	——	——	——	——	——	——	——	0.00125954	3.07284	up	0.00286777	2.44833	up
26	Cold-responsive protein kinase (CRPK)	Unigene_598157	CRPK1	0.0440244	3.10691	normal	0.000353284	5.02268	up	——	——	——	——	——	——	0.74882	0.426896	normal	0.00872145	-3.31173	down
27		Unigene_517452	CRPK1	0.0316051	2.79296	normal	0.00160215	4.39856	up	——	——	——	——	——	——	——	——	——	——	——	——
28		Unigene_507907	CRPK1	0.0563668	3.22612	normal	0.000209054	5.64356	up	0.00115862	-4.36184	down	0.00642914	-3.59905	down	——	——	——	——	——	——
29		Unigene_507908	CRPK1	0.0172033	3.47554	normal	0.00022498	5.18411	up	0.00108798	-4.20841	down	0.000440652	-3.30519	down	——	——	——	——	——	——
30		Unigene_510835	CRPK1	0.0227022	3.72562	normal	5.25666e-05	5.84039	up	0.000389153	-4.56367	down	0.00227469	-4.26563	down	——	——	——	——	——	——
31		Unigene_528339	Os04g0679100	0.0205701	3.46759	normal	0.000132071	5.3777	up	——	——	——	——	——	——	0.635621	-0.597907	normal	0.00190479	-3.92072	down
32		Unigene_075119	Os04g0679100	——	——	——	——	——	——	0.00804435	3.05822	up	0.0270563	2.86511	normal	——	——	——	——	——	——
33		Unigene_512170	CRPK1	——	——	——	——	——	——	0.0321614	-2.26991	normal	3.02537e-05	-3.31301	down	——	——	——	——	——	——
34		Unigene_072338	——	——	——	——	——	——	——	——	——	——	9.91033e-07	8.73325	up	——	——	——	——	——	——
35		Unigene_075970	——	——	——	——	——	——	——	0.00206286	3.57595	up	0.022843	2.85847	normal	0.927832	0.0964291	normal	0.00334187	1.13103	up
36		Unigene_193087	CRPK1	——	——	——	——	——	——	0.00961422	-2.54314	down	5.88385e-06	-3.52268	down	——	——	——	——	——	——
37	Late embryogenesis abundant protein (LEA)	Unigene_192963	LEA1	8.15884e-06	-2.84499	down	0.040159	-2.45735	normal	1.58582e-09	10.0967	up	1.13654e-06	8.61103	up	1.33e-09	7.08159	up	1.3e-07	8.48103	up
38		Unigene_590846	LEA14-A	1.7334e-09	-2.62437	down	0.0654289	-2.38566	normal	——	——	——	2.63822e-10	10.985	up	2.05e-20	7.90514	up	5.74e-14	8.62322	up
39		Unigene_032254	At5g17165	——	——	——	8.93867e-05	5.62743	up	——	——	——	——	——	——	——	——	——	——	——	——
40		Unigene_307629	At5g17165	——	——	——	——	——	——	0.000476439	4.88112	up	0.0135504	3.76464	normal	——	——	——	——	——	——
41		Unigene_311080	LEA1	——	——	——	——	——	——	7.68934e-09	7.37112	up	——	——	——	——	——	——	——	——	——
42		Unigene_588062	RAB28	——	——	——	——	——	——	3.65046e-11	7.03358	up	1.54994e-12	6.294	up	2.11e-12	5.31135	up	1.15e-18	6.49849	up
43		Unigene_302608	LEA46	——	——	——	——	——	——	——	——	——	——	——	——	2.81e-07	5.0969	up	0.000131786	5.06948	up
44		Unigene_517358	RAB28	——	——	——	——	——	——	——	——	——	——	——	——	2.19e-16	7.576	up	7.92e-26	9.90094	up
45	pre-mRNA processing factor (RDM)	Unigene_199061	RDM3	0.00809508	1.76634	up	0.0610768	2.16577	normal	——	——	——	——	——	——	——	——	——	——	——	——
46		Unigene_071287	RDM3	——	——	——	——	——	——	——	——	——	——	——	——	0.303589	-0.879927	normal	0.000395599	-1.65979	down
47		Unigene_031372	RDM16	——	——	——	——	——	——	——	——	——	8.62598e-09	10.097	up	——	——	——	——	——	——
48	C2H2-type zinc finger (ZAT)	Unigene_521896	ZAT1	0.0494809	3.14307	normal	0.00332377	4.23784	up	0.000502078	-4.17826	down	3.44859e-07	-6.5731	down	0.00256978	-3.00939	down	0.000369133	-5.58351	down
49		Unigene_603075	ZAT1	0.613141	0.990438	normal	0.000105098	5.85194	up	0.000383397	-4.28794	down	0.149535	-2.36852	normal	0.790312	0.371933	normal	0.000199777	-5.7515	down
50		Unigene_066562	ZAT5	0.00108278	-1.39757	down	0.337827	-1.17064	normal	——	——	——	——	——	——	——	——	——	——	——	——
51		Unigene_303778	ZAT5	0.000474054	-3.53299	down	0.295067	-1.49345	normal	——	——	——	——	——	——	——	——	——	——	——	——
52		Unigene_319626	ZAT11	0.000676528	-3.61718	down	0.119303	-2.26685	normal	——	——	——	——	——	——	——	——	——	——	——	——
53		Unigene_504899	ZFP36	0.00227757	3.77213	up	2.59844e-05	5.11436	up	3.3153e-08	-9.39758	down	0.00227416	-4.29506	down	——	——	——	——	——	——
54		Unigene_519951	ZFP36	——	——	——	7.10338e-06	6.72098	up	——	——	——	——	——	——	——	——	——	——	——	——
55		Unigene_421964	ZAT1	0.231989	2.15521	normal	0.000670522	5.07564	up	——	——	——	——	——	——	——	——	——	——	——	——
56		Unigene_017609	SE14	——	——	——	——	——	——	0.000386258	4.68372	up	0.00618786	3.51415	up	——	——	——	——	——	——
57		Unigene_052716	ZAT1	——	——	——	——	——	——	——	——	——	1.18747e-07	6.66153	up	——	——	——	——	——	——
58		Unigene_166260	——	——	——	——	——	——	——	——	——	——	——	——	——	——	——	——	5.87e-06	7.55826	up
59		Unigene_600633	YY1	——	——	——	——	——	——	——	——	——	——	——	——	0.931447	-0.13949	normal	0.000117319	-4.54785	down
60	Phenylalanine ammonia-lyase （PAL）	Unigene_125945	PAL	0.00662293	2.87335	up	6.92272e-05	4.9493	up	——	——	——	——	——	——	0.00031423	-4.51032	down	——	——	——
61		Unigene_174299	PAL	0.0695457	1.80514	normal	0.00568893	3.61678	up	——	——	——	——	——	——	——	——	——	——	——	——
62		Unigene_177880	PAL	0.0983548	1.68211	normal	0.00296504	3.75294	up	——	——	——	——	——	——	0.181867	-1.69102	normal	0.000605262	-4.13505	down
63		Unigene_188625	PAL	0.0269446	2.46951	normal	0.0031237	3.75303	up	——	——	——	——	——	——	——	——	——	——	——	——
64		Unigene_190944	PAL	0.155835	1.57433	normal	0.00622459	3.4453	up	——	——	——	——	——	——	——	——	——	——	——	——
65		Unigene_530304	PAL	0.100179	1.69009	normal	0.00993075	3.22412	up	——	——	——	——	——	——	0.890309	-0.209377	normal	0.000807589	-3.1865	down
66		Unigene_013898	ZB8	0.0781626	1.94012	normal	0.00908644	3.14644	up	——	——	——	——	——	——	——	——	——	——	——	——
67		Unigene_500139	ZB8	——	——	——	0.00451269	3.31208	up	——	——	——	——	——	——	——	——	——	——	——	——
68		Unigene_589979	ZB8	0.168212	1.02985	normal	0.00813675	3.24053	up	——	——	——	——	——	——	——	——	——	——	——	——
69		Unigene_606913	ZB8	——	——	——	6.91583e-05	5.75045	up	——	——	——	——	——	——	——	——	——	——	——	——
70		Unigene_307242	ZB8	——	——	——	——	——	——	3.33656e-05	5.83447	up	1.65386e-05	5.35376	up	——	——	——	——	——	——
71		Unigene_591132	PAL	——	——	——	——	——	——	0.0906645	-2.21292	normal	0.0067984	-2.59315	down	0.932043	-0.135243	normal	6.3e-06	-4.04533	down
72		Unigene_311097	PAL1	——	——	——	——	——	——	——	——	——	2.93135e-11	9.75519	up	0.768098	-0.587741	normal	0.000284324	-4.6829	down
73		Unigene_604244	PAL	——	——	——	——	——	——	——	——	——	——	——	——	0.00227445	-3.56353	down	4.64e-07	-6.72585	down
74		Unigene_324933	ZB8	——	——	——	——	——	——	——	——	——	——	——	——	0.99103	-0.0190574	normal	0.000923203	-2.74264	down
75	GH3 auxin-responsive promoter (GH3)	Unigene_526120	GH3.5	0.00431908	3.9584	up	0.000124323	5.67558	up	——	——	——	——	——	——	0.419698	-0.91444	normal	2.39e-09	-7.66175	down
76		Unigene_074692	GH3.12	0.0480722	2.1919	normal	0.00495232	3.82334	up	——	——	——	——	——	——	3.06e-11	-4.29891	down	1.71e-06	-4.95279	down
77		Unigene_195954	GH3.5	——	——	——	——	——	——	——	——	——	4.47401e-08	9.5865	up	——	——	——	——	——	——
78		Unigene_323561	GH3.5	——	——	——	——	——	——	——	——	——	——	——	——	0.016704	-3.05023	normal	6.89e-05	-3.68889	down
79		Unigene_033617	GH3.5	——	——	——	——	——	——	——	——	——	——	——	——	0.802744	-0.296151	normal	2.27e-05	-4.90746	down
80		Unigene_520253	GH3.7	——	——	——	——	——	——	——	——	——	——	——	——	0.0244412	-2.75895	normal	0.00316117	-3.62407	down
81		Unigene_048431	GH3.12	——	——	——	——	——	——	——	——	——	——	——	——	0.045225	-2.31141	normal	0.00204857	-3.32485	down
82		Unigene_323729	GH3.12	——	——	——	——	——	——	——	——	——	——	——	——	0.0253559	-2.20551	normal	3.36e-06	-2.40272	down
83		Unigene_604321	GH3.12	——	——	——	——	——	——	——	——	——	——	——	——	0.00185086	-2.95688	down	2.93e-11	-8.02434	down
84	MADS-box protein	Unigene_076249	AGL66	——	——	——	——	——	——	——	——	——	——	——	——	0.000611913	-2.83709	down	0.00795556	-2.22792	down
85	Cold-regulated protein	Unigene_445159	BLT14	5.98769e-20	5.81668	up	1.63509e-06	3.44424	up	8.78089e-05	-2.14402	down	--	--	--	1.26024e-05	-6.10122	down	0.12055	2.47294	normal
86		Unigene_592126	BLT14	——	——	——	——	——	——	——	——	——	4.77452e-10	10.7957	up	1.35e-18	5.1764	up	1.5e-57	6.90148	up
87		Unigene_509537	BLT14	——	——	——	——	——	——	7.24266e-10	8.1261	up	3.23695e-05	5.83562	up	8.56e-17	6.3923	up	9.93e-23	7.76651	up
88		Unigene_582963	BLT14	——	——	——	——	——	——	0.000460781	4.96214	up	0.0242061	4.46334	normal	1.5e-23	9.92292	up	——	——	——
89		Unigene_315398	COR27	——	——	——	——	——	——	——	——	——	——	——	——	0.00151066	3.04626	up	——	——	——
90		Unigene_006355	——	——	——	——	——	——	——	2.1501e-07	7.6803	up	——	——	——	——	——	——	——	——	——
91		Unigene_020992	——	——	——	——	——	——	——	6.36688e-22	14.0641	up	6.19447e-14	12.2143	up	1.29e-55	10.4179	up	1.98e-106	12.0135	up
92		Unigene_168810	——	——	——	——	——	——	——	——	——	——	3.10681e-13	11.6745	up	5.4e-35	6.94022	up	2.27e-162	8.22615	up
93		Unigene_182858	——	——	——	——	——	——	——	8.76383e-15	10.0163	up	5.98588e-13	8.8898	up	9.81e-49	8.3131	up	2.78e-54	8.02925	up
94		Unigene_023947	——	——	——	——	——	——	——	——	——	——	8.78656e-12	10.7763	up	5.92e-27	10.3597	up	8.51e-19	11.7851	up
95		Unigene_296633	——	——	——	——	——	——	——	——	——	——	——	——	——	4.29e-16	7.17898	up	——	——	——
96		Unigene_163823	——	——	——	——	——	——	——	——	——	——	——	——	——	0.00055394	3.64619	up	3.02e-15	8.63398	up
97	Cold responsive protein	Unigene_593975	——	——	——	——	——	——		4.57261e-16	11.2511	up	8.78656e-12	10.283	up	2.71e-69	11.3974	up	6.59e-101	13.0243	up
