# Supplementary material for: Tissue-Specific Transcriptomic Analysis Reveals the Response Mechanism of Cold Stress in Poa crymophila, a Native Grass in Qinghai-Tibet Plateau
Source: Preprints.org preprint supplement (doi:10.20944/preprints202311.0336.v1), 2023-11-06
Supplement: Supplementary file 23 [file Table S8 Differently expressed genes related to Ca2+ signaling of roots, stems and leaves under cold stress.xlsx]

## Sheet: Roots
Table S8 Differently expressed genes related to Ca2+ signaling of roots, stems and leaves under cold stress.
Gene classification	ID	Gene name	R0_vs_R3_DESeq2_FDR	R0_vs_R3_DESeq2_log2FC	R0_vs_R3_regulated	R0_vs_R6_DESeq2_FDR	R0_vs_R6_DESeq2_log2FC	R0_vs_R6_regulated	Pfam_annotation	Swissprot_annotation	nr_annotation	GO_second_level_annotation	KEGG_pathway_annotation
Receptor-like kinase (RLK)	Unigene_188710	RLK5	0.327798	0.772085	normal	0.00378898	3.65342	up	Protein kinase domain;; Protein tyrosine and serine/threonine kinase	Receptor-like protein kinase 5 OS=Arabidopsis thaliana OX=3702 GN=RLK5 PE=1 SV=1	receptor-like protein kinase 5 [Brachypodium distachyon]	molecular function: catalytic activity (GO:0003824);; biological process: metabolic process (GO:0008152);; biological process: cellular process (GO:0009987);; molecular function: binding (GO:0005488)	--
	Unigene_194936	LRR-RLK	0.0377348	1.78958	normal	0.00188803	2.72227	up	Protein tyrosine and serine/threonine kinase;; Protein kinase domain;; Leucine rich repeat;; Leucine Rich repeats (2 copies);; Leucine rich repeat N-terminal domain;; Leucine Rich Repeat	Probable leucine-rich repeat receptor-like serine/threonine-protein kinase At3g14840 OS=Arabidopsis thaliana OX=3702 GN=LRR-RLK PE=1 SV=1	Leucine-rich repeat receptor protein kinase EXS [Hordeum vulgare]	biological process: reproduction (GO:0000003);; biological process: reproductive process (GO:0022414);; biological process: developmental process (GO:0032502);; molecular function: catalytic activity (GO:0003824);; biological process: metabolic process (GO:0008152);; biological process: cellular process (GO:0009987);; molecular function: signal transducer activity (GO:0004871);; molecular functio…	MAPK signaling pathway - plant (ko04016);; Plant hormone signal transduction (ko04075);; Plant-pathogen interaction (ko04626)
	Unigene_526534	CRLK2	0.0647141	3.07991	normal	0.000741324	5.18031	up	Protein tyrosine and serine/threonine kinase;; Protein kinase domain;; Protein tyrosine and serine/threonine kinase;; Protein kinase domain	Calcium/calmodulin-regulated receptor-like kinase 2 OS=Arabidopsis thaliana OX=3702 GN=CRLK2 PE=2 SV=1	hypothetical protein CFC21_097152 [Triticum aestivum]	molecular function: catalytic activity (GO:0003824);; biological process: metabolic process (GO:0008152);; biological process: cellular process (GO:0009987);; molecular function: binding (GO:0005488)	Plant-pathogen interaction (ko04626)
Calmodulin-like protein (CML)	Unigene_313657	CML5	0.00718579	3.17505	up	0.000241442	4.83418	up	EF hand;; EF-hand domain pair;; EF hand;; EF-hand domain;; EF-hand domain pair;; EF-hand domain;; Cytoskeletal-regulatory complex EF hand;; Secreted protein acidic and rich in cysteine Ca binding region;; Caleosin related protein	Calmodulin-like protein 5 OS=Oryza sativa subsp. japonica OX=39947 GN=CML5 PE=2 SV=1	hypothetical protein CFC21_076066 [Triticum aestivum]	molecular function: binding (GO:0005488);; biological process: response to stimulus (GO:0050896);; biological process: cellular process (GO:0009987);; biological process: signaling (GO:0023052);; biological process: single-organism process (GO:0044699);; biological process: biological regulation (GO:0065007)	Plant-pathogen interaction (ko04626)
	Unigene_003177	CML14	0.010198	3.42637	normal	0.000411503	4.49844	up	EF hand;; EF-hand domain pair;; EF-hand domain;; EF hand;; EF-hand domain pair;; Cytoskeletal-regulatory complex EF hand	Probable calcium-binding protein CML14 OS=Oryza sativa subsp. japonica OX=39947 GN=CML14 PE=2 SV=1	putative calcium-binding protein CML14 [Panicum miliaceum]	molecular function: binding (GO:0005488)	Plant-pathogen interaction (ko04626)
	Unigene_186960	CML15	0.0813887	2.30262	normal	0.00387271	3.80743	up	EF hand;; EF-hand domain pair;; EF hand;; EF-hand domain;; EF-hand domain pair;; Secreted protein acidic and rich in cysteine Ca binding region;; Dockerin type I domain	Probable calcium-binding protein CML15 OS=Oryza sativa subsp. japonica OX=39947 GN=CML15 PE=2 SV=1	polcalcin Jun o 2 [Hordeum vulgare]	molecular function: binding (GO:0005488);; cellular component: cell (GO:0005623);; cellular component: cell part (GO:0044464);; cellular component: organelle (GO:0043226);; biological process: response to stimulus (GO:0050896);; biological process: multicellular organismal process (GO:0032501);; biological process: developmental process (GO:0032502);; biological process: single-organism process (…	Plant-pathogen interaction (ko04626)
	Unigene_055723	CML15	0.330959	0.788698	normal	0.00070445	4.56021	up	EF hand;; EF hand;; EF-hand domain pair;; EF-hand domain;; EF-hand domain pair;; Secreted protein acidic and rich in cysteine Ca binding region;; Dockerin type I domain	Probable calcium-binding protein CML15 OS=Oryza sativa subsp. japonica OX=39947 GN=CML15 PE=2 SV=1	unnamed protein product [Triticum aestivum]	molecular function: binding (GO:0005488);; cellular component: cell (GO:0005623);; cellular component: cell part (GO:0044464);; cellular component: organelle (GO:0043226);; biological process: response to stimulus (GO:0050896);; biological process: multicellular organismal process (GO:0032501);; biological process: developmental process (GO:0032502);; biological process: single-organism process (…	Plant-pathogen interaction (ko04626)
	Unigene_199398	CML16	0.0157013	3.38908	normal	2.5757e-05	6.03054	up	EF hand;; EF hand;; EF-hand domain pair;; EF-hand domain;; EF-hand domain pair;; Secreted protein acidic and rich in cysteine Ca binding region;; Dockerin type I domain	Probable calcium-binding protein CML16 OS=Oryza sativa subsp. japonica OX=39947 GN=CML16 PE=2 SV=1	predicted protein, partial [Hordeum vulgare subsp. vulgare]	molecular function: binding (GO:0005488);; cellular component: cell (GO:0005623);; cellular component: cell part (GO:0044464);; cellular component: organelle (GO:0043226);; cellular component: membrane (GO:0016020)	Plant-pathogen interaction (ko04626)
	Unigene_515274	CML16	0.249519	1.6507	normal	0.000118265	5.69392	up	EF hand;; EF-hand domain pair;; EF hand;; EF-hand domain;; EF-hand domain pair;; Dockerin type I domain;; Secreted protein acidic and rich in cysteine Ca binding region	Probable calcium-binding protein CML16 OS=Oryza sativa subsp. japonica OX=39947 GN=CML16 PE=2 SV=1	predicted protein, partial [Hordeum vulgare subsp. vulgare]	molecular function: binding (GO:0005488);; cellular component: cell (GO:0005623);; cellular component: cell part (GO:0044464);; cellular component: organelle (GO:0043226);; cellular component: membrane (GO:0016020)	Plant-pathogen interaction (ko04626)
	Unigene_046101	CML16	0.0642223	2.73318	normal	4.63898e-05	6.01022	up	EF hand;; EF-hand domain pair;; EF hand;; EF-hand domain;; EF-hand domain pair;; Dockerin type I domain;; Secreted protein acidic and rich in cysteine Ca binding region	Probable calcium-binding protein CML16 OS=Oryza sativa subsp. japonica OX=39947 GN=CML16 PE=2 SV=1	predicted protein, partial [Hordeum vulgare subsp. vulgare]	molecular function: binding (GO:0005488);; cellular component: cell (GO:0005623);; cellular component: cell part (GO:0044464);; cellular component: organelle (GO:0043226);; cellular component: membrane (GO:0016020)	Plant-pathogen interaction (ko04626)
	Unigene_528462	CML18	0.0697283	2.73874	normal	0.000208242	5.31902	up	PPR repeat family;; PPR repeat;; PPR repeat;; Pentatricopeptide repeat domain;; Pentacotripeptide-repeat region of PRORP;; EF hand;; EF-hand domain pair;; EF hand;; EF-hand domain;; EF-hand domain pair;; Dockerin type I domain;; Secreted protein acidic and rich in cysteine Ca binding region	Probable calcium-binding protein CML18 OS=Oryza sativa subsp. japonica OX=39947 GN=CML18 PE=2 SV=1	hypothetical protein CFC21_006169 [Triticum aestivum]	molecular function: binding (GO:0005488)	Plant-pathogen interaction (ko04626)
	Unigene_062401	CML19	0.223454	1.72765	normal	0.000245738	4.95392	up	EF-hand domain pair;; EF hand;; EF hand;; EF-hand domain pair;; EF-hand domain	Putative calcium-binding protein CML19 OS=Oryza sativa subsp. japonica OX=39947 GN=CML19 PE=3 SV=1	probable calcium-binding protein CML25/26 [Aegilops tauschii subsp. tauschii]	molecular function: binding (GO:0005488)	Plant-pathogen interaction (ko04626)
	Unigene_518446	CML19	0.159825	1.93811	normal	0.00542782	3.87185	up	EF-hand domain pair;; EF hand;; EF-hand domain pair;; EF-hand domain;; EF hand	Putative calcium-binding protein CML19 OS=Oryza sativa subsp. japonica OX=39947 GN=CML19 PE=3 SV=1	hypothetical protein CFC21_044459 [Triticum aestivum]	biological process: response to stimulus (GO:0050896);; molecular function: binding (GO:0005488);; cellular component: cell (GO:0005623);; cellular component: cell part (GO:0044464);; cellular component: organelle (GO:0043226);; cellular component: membrane (GO:0016020)	Plant-pathogen interaction (ko04626)
	Unigene_519733	CML19	--	--	--	3.82398e-05	5.86983	up	EF hand;; EF-hand domain pair;; EF-hand domain pair;; EF-hand domain;; EF hand	Putative calcium-binding protein CML19 OS=Oryza sativa subsp. japonica OX=39947 GN=CML19 PE=3 SV=1	uncharacterized protein LOC109782799 [Aegilops tauschii subsp. tauschii]	biological process: response to stimulus (GO:0050896);; molecular function: binding (GO:0005488);; cellular component: cell (GO:0005623);; cellular component: cell part (GO:0044464);; cellular component: organelle (GO:0043226);; cellular component: membrane (GO:0016020)	Plant-pathogen interaction (ko04626)
	Unigene_013228	CML21	0.00909205	-1.34349	down	0.292326	-1.60704	normal	EF-hand domain pair;; EF hand;; EF-hand domain;; EF hand;; Secreted protein acidic and rich in cysteine Ca binding region;; EF-hand domain pair	Probable calcium-binding protein CML21 OS=Arabidopsis thaliana OX=3702 GN=CML21 PE=2 SV=1	probable calcium-binding protein CML21 [Aegilops tauschii subsp. tauschii]	molecular function: binding (GO:0005488)	Plant-pathogen interaction (ko04626)
	Unigene_595183	CML22	0.0146744	3.72456	normal	0.00163843	4.34553	up	EF hand;; EF-hand domain pair;; EF hand;; EF-hand domain;; EF-hand domain pair;; Cytoskeletal-regulatory complex EF hand	Probable calcium-binding protein CML22 OS=Oryza sativa subsp. japonica OX=39947 GN=CML22 PE=3 SV=1	--	molecular function: binding (GO:0005488);; cellular component: cell (GO:0005623);; cellular component: cell part (GO:0044464);; cellular component: organelle (GO:0043226);; biological process: response to stimulus (GO:0050896);; cellular component: membrane (GO:0016020);; cellular component: organelle part (GO:0044422);; cellular component: membrane part (GO:0044425)	Plant-pathogen interaction (ko04626)
	Unigene_320381	CML25	0.00969126	4.01861	up	0.000414396	4.92278	up	EF hand;; EF-hand domain;; EF-hand domain pair;; EF hand;; EF-hand domain pair	Probable calcium-binding protein CML25 OS=Arabidopsis thaliana OX=3702 GN=CML25 PE=2 SV=1	probable calcium-binding protein CML35 [Aegilops tauschii subsp. tauschii]	molecular function: binding (GO:0005488);; cellular component: cell (GO:0005623);; cellular component: membrane (GO:0016020);; cellular component: cell part (GO:0044464);; biological process: response to stimulus (GO:0050896);; biological process: multi-organism process (GO:0051704)	Plant-pathogen interaction (ko04626)
	Unigene_588216	CML27	0.0152019	3.74257	normal	4.32787e-05	5.81146	up	EF hand;; EF-hand domain;; EF-hand domain pair;; EF hand;; EF-hand domain pair;; Cytoskeletal-regulatory complex EF hand	Probable calcium-binding protein CML27 OS=Oryza sativa subsp. japonica OX=39947 GN=CML27 PE=2 SV=1	hypothetical protein CFC21_052114 [Triticum aestivum]	biological process: cellular process (GO:0009987);; biological process: developmental process (GO:0032502);; biological process: single-organism process (GO:0044699);; biological process: cellular component organization or biogenesis (GO:0071840);; molecular function: binding (GO:0005488);; biological process: response to stimulus (GO:0050896)	Plant-pathogen interaction (ko04626)
	Unigene_520771	CML27	0.21559	2.23123	normal	0.00253374	4.49905	up	EF hand;; EF-hand domain;; EF-hand domain pair;; EF hand;; EF-hand domain pair;; Cytoskeletal-regulatory complex EF hand	Probable calcium-binding protein CML27 OS=Oryza sativa subsp. japonica OX=39947 GN=CML27 PE=2 SV=1	hypothetical protein CFC21_052114 [Triticum aestivum]	biological process: cellular process (GO:0009987);; biological process: developmental process (GO:0032502);; biological process: single-organism process (GO:0044699);; biological process: cellular component organization or biogenesis (GO:0071840);; molecular function: binding (GO:0005488);; biological process: response to stimulus (GO:0050896)	Plant-pathogen interaction (ko04626)
	Unigene_521507	CML30	7.19066e-05	2.17351	up	0.0127316	2.73501	normal	EF hand;; EF-hand domain pair;; EF hand;; EF-hand domain;; EF-hand domain pair;; Secreted protein acidic and rich in cysteine Ca binding region	Probable calcium-binding protein CML30 OS=Oryza sativa subsp. japonica OX=39947 GN=CML30 PE=2 SV=1	hypothetical protein CFC21_096332 [Triticum aestivum]	molecular function: binding (GO:0005488)	MAPK signaling pathway - plant (ko04016);; Phosphatidylinositol signaling system (ko04070);; Plant-pathogen interaction (ko04626)
	Unigene_021550	CML45	0.0192335	2.85732	normal	0.00471822	3.54048	up	EF hand;; EF hand;; EF-hand domain;; EF-hand domain pair;; EF-hand domain pair	Probable calcium-binding protein CML45 OS=Arabidopsis thaliana OX=3702 GN=CML45 PE=2 SV=1	hypothetical protein CFC21_066031 [Triticum aestivum]	molecular function: binding (GO:0005488);; cellular component: cell (GO:0005623);; cellular component: cell part (GO:0044464);; cellular component: organelle (GO:0043226)	MAPK signaling pathway - plant (ko04016);; Phosphatidylinositol signaling system (ko04070);; Plant-pathogen interaction (ko04626)
Ca2+-dependent protein kinase (CPK/CDPK)	Unigene_056456	CPK7	0.0623903	2.81719	normal	0.00673263	3.95985	up	Protein kinase domain;; Protein tyrosine and serine/threonine kinase;; EF hand;; EF-hand domain pair;; EF-hand domain;; EF-hand domain pair;; Lipopolysaccharide kinase (Kdo/WaaP) family	Calcium-dependent protein kinase 7 OS=Oryza sativa subsp. japonica OX=39947 GN=CPK7 PE=2 SV=2	unnamed protein product [Triticum turgidum subsp. durum]	biological process: response to stimulus (GO:0050896);; molecular function: catalytic activity (GO:0003824);; biological process: metabolic process (GO:0008152);; biological process: cellular process (GO:0009987);; molecular function: binding (GO:0005488);; cellular component: cell (GO:0005623);; cellular component: cell part (GO:0044464);; cellular component: organelle (GO:0043226);; cellular co…	Plant-pathogen interaction (ko04626)
	Unigene_519741	CPK4	0.0274386	2.50852	normal	0.0029465	3.7982	up	Protein kinase domain;; Protein tyrosine and serine/threonine kinase;; EF hand;; EF hand;; EF-hand domain;; EF-hand domain pair;; EF-hand domain pair;; Protein kinase domain;; Protein tyrosine and serine/threonine kinase	Calcium-dependent protein kinase 4 OS=Oryza sativa subsp. japonica OX=39947 GN=CPK4 PE=2 SV=1	calcium-dependent protein kinase 4 isoform X1 [Brachypodium distachyon]	biological process: response to stimulus (GO:0050896);; biological process: biological regulation (GO:0065007);; molecular function: catalytic activity (GO:0003824);; biological process: metabolic process (GO:0008152);; biological process: cellular process (GO:0009987);; molecular function: binding (GO:0005488);; cellular component: cell (GO:0005623);; cellular component: cell part (GO:0044464);;…	Plant-pathogen interaction (ko04626)
	Unigene_595638	CPK4	0.0300845	3.44198	normal	9.06373e-05	5.51973	up	Protein kinase domain;; Protein tyrosine and serine/threonine kinase;; EF hand;; EF hand;; EF-hand domain pair;; EF-hand domain;; EF-hand domain pair;; Kinase-like;; Secreted protein acidic and rich in cysteine Ca binding region	Calcium-dependent protein kinase 4 OS=Oryza sativa subsp. japonica OX=39947 GN=CPK4 PE=2 SV=1	--	biological process: response to stimulus (GO:0050896);; biological process: biological regulation (GO:0065007);; molecular function: catalytic activity (GO:0003824);; biological process: metabolic process (GO:0008152);; biological process: cellular process (GO:0009987);; molecular function: binding (GO:0005488);; cellular component: cell (GO:0005623);; cellular component: cell part (GO:0044464);;…	Plant-pathogen interaction (ko04626)
	Unigene_518472	CPK20	0.039922	3.06447	normal	0.000378017	5.00298	up	Protein kinase domain;; Protein tyrosine and serine/threonine kinase	Calcium-dependent protein kinase 20 OS=Oryza sativa subsp. japonica OX=39947 GN=CPK20 PE=2 SV=2	hypothetical protein BRADI_1g24240v3 [Brachypodium distachyon]	biological process: response to stimulus (GO:0050896);; molecular function: catalytic activity (GO:0003824);; biological process: metabolic process (GO:0008152);; biological process: cellular process (GO:0009987);; molecular function: binding (GO:0005488);; cellular component: cell (GO:0005623);; cellular component: cell part (GO:0044464);; cellular component: organelle (GO:0043226);; cellular co…	Plant-pathogen interaction (ko04626)
	Unigene_046569	CPK19	0.0342369	2.16423	normal	0.00188008	4.08766	up	Protein kinase domain;; EF hand;; Protein tyrosine and serine/threonine kinase;; EF-hand domain pair;; EF-hand domain pair;; EF-hand domain;; EF hand;; Cytoskeletal-regulatory complex EF hand;; Secreted protein acidic and rich in cysteine Ca binding region	Calcium-dependent protein kinase 19 OS=Oryza sativa subsp. japonica OX=39947 GN=CPK19 PE=2 SV=2	calcium-dependent protein kinase [Triticum aestivum]	biological process: response to stimulus (GO:0050896);; molecular function: catalytic activity (GO:0003824);; biological process: metabolic process (GO:0008152);; biological process: cellular process (GO:0009987);; molecular function: binding (GO:0005488);; cellular component: cell (GO:0005623);; cellular component: cell part (GO:0044464);; cellular component: organelle (GO:0043226);; cellular co…	Plant-pathogen interaction (ko04626)
	Unigene_058497	CPK10	0.115196	2.57438	normal	0.00209892	4.66252	up	EF hand;; EF-hand domain pair;; EF-hand domain;; EF hand;; EF-hand domain pair	Calcium-dependent protein kinase 10 OS=Oryza sativa subsp. japonica OX=39947 GN=CPK10 PE=2 SV=1	Calcium-dependent protein kinase 1 [Zea mays]	biological process: response to stimulus (GO:0050896);; molecular function: catalytic activity (GO:0003824);; biological process: metabolic process (GO:0008152);; biological process: cellular process (GO:0009987);; molecular function: binding (GO:0005488);; cellular component: cell (GO:0005623);; cellular component: cell part (GO:0044464);; cellular component: organelle (GO:0043226);; cellular co…	Plant-pathogen interaction (ko04626)
	Unigene_185593	CPK10	--	--	--	1.01209e-05	6.55151	up	--	Calcium-dependent protein kinase 10 OS=Oryza sativa subsp. japonica OX=39947 GN=CPK10 PE=2 SV=1	--	biological process: response to stimulus (GO:0050896);; molecular function: catalytic activity (GO:0003824);; biological process: metabolic process (GO:0008152);; biological process: cellular process (GO:0009987);; molecular function: binding (GO:0005488);; cellular component: cell (GO:0005623);; cellular component: cell part (GO:0044464);; cellular component: organelle (GO:0043226);; cellular co…	Plant-pathogen interaction (ko04626)
Calmodulin-binding transcription activator (CAMTA)	Unigene_516539	CAMTA3	--	--	--	2.73125e-06	7.11547	up	IPT/TIG domain;; CG-1 domain	Calmodulin-binding transcription activator 3 OS=Arabidopsis thaliana OX=3702 GN=CAMTA3 PE=1 SV=1	calmodulin-binding transcription activator 3 isoform X1 [Brachypodium distachyon]	molecular function: nucleic acid binding transcription factor activity (GO:0001071);; biological process: biological regulation (GO:0065007);; biological process: metabolic process (GO:0008152);; biological process: cellular process (GO:0009987);; biological process: response to stimulus (GO:0050896);; molecular function: binding (GO:0005488);; cellular component: cell (GO:0005623);; cellular com…	MAPK signaling pathway - plant (ko04016);; Phosphatidylinositol signaling system (ko04070);; Plant-pathogen interaction (ko04626)
	Unigene_529397	CAMTA3	0.0153468	3.20177	normal	0.00059475	4.76182	up	CG-1 domain;; IQ calmodulin-binding motif;; Ankyrin repeats (3 copies);; IPT/TIG domain;; Ankyrin repeat	Calmodulin-binding transcription activator 3 OS=Arabidopsis thaliana OX=3702 GN=CAMTA3 PE=1 SV=1	Calmodulin-binding transcription activator 2 [Hordeum vulgare]	molecular function: nucleic acid binding transcription factor activity (GO:0001071);; biological process: biological regulation (GO:0065007);; biological process: metabolic process (GO:0008152);; biological process: cellular process (GO:0009987);; biological process: response to stimulus (GO:0050896);; molecular function: binding (GO:0005488);; cellular component: cell (GO:0005623);; cellular com…	MAPK signaling pathway - plant (ko04016);; Phosphatidylinositol signaling system (ko04070);; Plant-pathogen interaction (ko04626)
	Unigene_605479	CAMTA3	0.118875	2.38841	normal	0.00015168	5.27582	up	Ankyrin repeats (3 copies);; IQ calmodulin-binding motif;; IPT/TIG domain;; CG-1 domain	Calmodulin-binding transcription activator 3 OS=Arabidopsis thaliana OX=3702 GN=CAMTA3 PE=1 SV=1	calmodulin-binding transcription activator 3 isoform X1 [Brachypodium distachyon]	molecular function: nucleic acid binding transcription factor activity (GO:0001071);; biological process: biological regulation (GO:0065007);; biological process: metabolic process (GO:0008152);; biological process: cellular process (GO:0009987);; biological process: response to stimulus (GO:0050896);; molecular function: binding (GO:0005488);; cellular component: cell (GO:0005623);; cellular com…	MAPK signaling pathway - plant (ko04016);; Phosphatidylinositol signaling system (ko04070);; Plant-pathogen interaction (ko04626)
	Unigene_524060	CAMTA4	0.335658	1.59428	normal	0.00161971	4.43307	up	IQ calmodulin-binding motif;; Ankyrin repeats (3 copies);; Ankyrin repeats (many copies);; Ankyrin repeat;; CG-1 domain	Calmodulin-binding transcription activator 4 OS=Arabidopsis thaliana OX=3702 GN=CAMTA4 PE=1 SV=1	hypothetical protein CFC21_029925 [Triticum aestivum]	molecular function: nucleic acid binding transcription factor activity (GO:0001071);; biological process: biological regulation (GO:0065007);; biological process: metabolic process (GO:0008152);; biological process: cellular process (GO:0009987);; molecular function: binding (GO:0005488);; cellular component: cell (GO:0005623);; cellular component: cell part (GO:0044464);; cellular component: org…	--
CBL-interaction protein kinase (CIPK)	Unigene_190840	CIPK7	0.0206462	2.97492	normal	0.00117998	4.52063	up	Protein kinase domain;; Protein tyrosine and serine/threonine kinase;; NAF domain;; Kinase-like	CBL-interacting protein kinase 7 OS=Oryza sativa subsp. japonica OX=39947 GN=CIPK7 PE=2 SV=1	hypothetical protein CFC21_079396 [Triticum aestivum]	molecular function: catalytic activity (GO:0003824);; biological process: metabolic process (GO:0008152);; biological process: cellular process (GO:0009987);; molecular function: binding (GO:0005488);; cellular component: cell (GO:0005623);; cellular component: cell part (GO:0044464);; cellular component: organelle (GO:0043226);; biological process: response to stimulus (GO:0050896);; biological …	--
	Unigene_322906	CIPK12	7.17093e-08	-1.9048	down	0.187459	-1.75724	normal	Protein kinase domain;; NAF domain;; Protein tyrosine and serine/threonine kinase	CBL-interacting protein kinase 12 OS=Oryza sativa subsp. japonica OX=39947 GN=CIPK12 PE=1 SV=1	--	molecular function: catalytic activity (GO:0003824);; biological process: metabolic process (GO:0008152);; biological process: cellular process (GO:0009987);; molecular function: binding (GO:0005488);; cellular component: cell (GO:0005623);; cellular component: cell part (GO:0044464);; biological process: signaling (GO:0023052);; biological process: single-organism process (GO:0044699);; biologic…	MAPK signaling pathway - plant (ko04016);; Phosphatidylinositol signaling system (ko04070);; Plant-pathogen interaction (ko04626)
	Unigene_165520	CIPK14	0.0448892	2.55675	normal	0.000377264	5.05227	up	Protein kinase domain;; Protein tyrosine and serine/threonine kinase;; Kinase-like	CBL-interacting protein kinase 14 OS=Oryza sativa subsp. japonica OX=39947 GN=CIPK14 PE=2 SV=1	unnamed protein product [Triticum turgidum subsp. durum]	molecular function: catalytic activity (GO:0003824);; biological process: metabolic process (GO:0008152);; biological process: cellular process (GO:0009987);; molecular function: binding (GO:0005488)	MAPK signaling pathway - plant (ko04016);; Phosphatidylinositol signaling system (ko04070);; Plant-pathogen interaction (ko04626)
	Unigene_520911	CIPK14	6.498e-09	1.92851	up	0.0124319	2.79491	normal	Protein kinase domain;; Protein tyrosine and serine/threonine kinase;; NAF domain;; Kinase-like	CBL-interacting protein kinase 14 OS=Oryza sativa subsp. japonica OX=39947 GN=CIPK14 PE=2 SV=1	CBL-interacting protein kinase 14 [Hordeum vulgare subsp. spontaneum]	molecular function: catalytic activity (GO:0003824);; biological process: metabolic process (GO:0008152);; biological process: cellular process (GO:0009987);; molecular function: binding (GO:0005488);; biological process: signaling (GO:0023052);; biological process: single-organism process (GO:0044699);; biological process: response to stimulus (GO:0050896);; biological process: biological regula…	--
	Unigene_599226	CIPK16	0.0767853	2.86723	normal	0.000275529	5.11295	up	Protein kinase domain;; Protein tyrosine and serine/threonine kinase;; NAF domain;; Kinase-like	CBL-interacting protein kinase 16 OS=Oryza sativa subsp. japonica OX=39947 GN=CIPK16 PE=2 SV=1	hypothetical protein CFC21_065996 [Triticum aestivum]	molecular function: catalytic activity (GO:0003824);; biological process: metabolic process (GO:0008152);; biological process: cellular process (GO:0009987);; molecular function: binding (GO:0005488);; cellular component: cell (GO:0005623);; cellular component: cell part (GO:0044464);; biological process: localization (GO:0051179);; biological process: response to stimulus (GO:0050896);; biologic…	MAPK signaling pathway - plant (ko04016);; Phosphatidylinositol signaling system (ko04070);; Plant-pathogen interaction (ko04626)
	Unigene_525385	CIPK17	0.638056	0.372857	normal	0.00679169	3.39505	up	Protein kinase domain;; Protein tyrosine and serine/threonine kinase;; NAF domain	CBL-interacting protein kinase 17 OS=Oryza sativa subsp. japonica OX=39947 GN=CIPK17 PE=2 SV=1	CBL-interacting protein kinase 17 [Hordeum vulgare subsp. spontaneum]	biological process: response to stimulus (GO:0050896);; molecular function: catalytic activity (GO:0003824);; biological process: metabolic process (GO:0008152);; biological process: cellular process (GO:0009987);; molecular function: binding (GO:0005488);; cellular component: cell (GO:0005623);; cellular component: cell part (GO:0044464);; cellular component: organelle (GO:0043226);; cellular co…	MAPK signaling pathway - plant (ko04016);; Phosphatidylinositol signaling system (ko04070);; Plant-pathogen interaction (ko04626)
	Unigene_074585	CIPK2	0.000342438	-1.66061	down	0.162409	-1.50571	normal	Flavin containing amine oxidoreductase;; Pyridine nucleotide-disulphide oxidoreductase;; NAD(P)-binding Rossmann-like domain;; Protein kinase domain;; Protein tyrosine and serine/threonine kinase	CBL-interacting protein kinase 19 OS=Oryza sativa subsp. japonica OX=39947 GN=CIPK19 PE=1 SV=1	uncharacterized protein LOC4336652 [Oryza sativa Japonica Group]	molecular function: catalytic activity (GO:0003824);; biological process: metabolic process (GO:0008152);; biological process: cellular process (GO:0009987);; molecular function: binding (GO:0005488);; biological process: single-organism process (GO:0044699)	--
	Unigene_593776	CIPK23	0.0362466	3.23729	normal	0.00179512	4.37692	up	Protein kinase domain;; Protein tyrosine and serine/threonine kinase;; Kinase-like;; NAF domain	CBL-interacting protein kinase 2 OS=Oryza sativa subsp. japonica OX=39947 GN=CIPK2 PE=2 SV=1	hypothetical protein CFC21_028092 [Triticum aestivum]	biological process: response to stimulus (GO:0050896);; molecular function: catalytic activity (GO:0003824);; biological process: metabolic process (GO:0008152);; biological process: cellular process (GO:0009987);; molecular function: binding (GO:0005488);; cellular component: cell (GO:0005623);; cellular component: cell part (GO:0044464);; biological process: signaling (GO:0023052);; biological …	--
	Unigene_020918	CIPK23	0.131224	2.42848	normal	0.00051817	5.16947	up	Protein kinase domain;; Protein tyrosine and serine/threonine kinase;; NAF domain;; Kinase-like	CBL-interacting protein kinase 23 OS=Oryza sativa subsp. japonica OX=39947 GN=CIPK23 PE=2 SV=1	CBL-interacting protein kinase 23 [Hordeum vulgare subsp. spontaneum]	biological process: response to stimulus (GO:0050896);; molecular function: catalytic activity (GO:0003824);; biological process: metabolic process (GO:0008152);; biological process: cellular process (GO:0009987);; molecular function: binding (GO:0005488);; cellular component: cell (GO:0005623);; cellular component: cell part (GO:0044464);; cellular component: organelle (GO:0043226);; cellular co…	--
	Unigene_578156	CIPK23	0.169688	2.22839	normal	0.00122912	4.80666	up	Protein kinase domain;; Protein tyrosine and serine/threonine kinase;; NAF domain;; Kinase-like	CBL-interacting protein kinase 23 OS=Oryza sativa subsp. japonica OX=39947 GN=CIPK23 PE=2 SV=1	CBL-interacting protein kinase 23 [Hordeum vulgare subsp. spontaneum]	biological process: response to stimulus (GO:0050896);; molecular function: catalytic activity (GO:0003824);; biological process: metabolic process (GO:0008152);; biological process: cellular process (GO:0009987);; molecular function: binding (GO:0005488);; cellular component: cell (GO:0005623);; cellular component: cell part (GO:0044464);; cellular component: organelle (GO:0043226);; cellular co…	MAPK signaling pathway - plant (ko04016);; Phosphatidylinositol signaling system (ko04070);; Plant-pathogen interaction (ko04626)
	Unigene_196550	CIPK24	--	--	--	0.000794128	4.26574	up	Protein kinase domain;; Protein tyrosine and serine/threonine kinase;; NAF domain;; Kinase-like	CBL-interacting protein kinase 24 OS=Oryza sativa subsp. japonica OX=39947 GN=CIPK24 PE=1 SV=1	CBL-interacting protein kinase 24 [Hordeum vulgare]	cellular component: cell (GO:0005623);; cellular component: organelle (GO:0043226);; cellular component: cell part (GO:0044464);; molecular function: catalytic activity (GO:0003824);; biological process: metabolic process (GO:0008152);; biological process: cellular process (GO:0009987);; molecular function: binding (GO:0005488);; cellular component: membrane (GO:0016020);; cellular component: org…	--
	Unigene_195263	CIPK26	0.237813	2.03096	normal	0.00659762	4.29119	up	Protein kinase domain;; Protein tyrosine and serine/threonine kinase;; NAF domain;; Kinase-like	CBL-interacting protein kinase 26 OS=Oryza sativa subsp. japonica OX=39947 GN=CIPK26 PE=2 SV=1	CBL-interacting protein kinase 26 [Brachypodium distachyon]	molecular function: catalytic activity (GO:0003824);; biological process: metabolic process (GO:0008152);; biological process: cellular process (GO:0009987);; molecular function: binding (GO:0005488);; biological process: signaling (GO:0023052);; biological process: single-organism process (GO:0044699);; biological process: response to stimulus (GO:0050896);; biological process: biological regula…	MAPK signaling pathway - plant (ko04016);; Phosphatidylinositol signaling system (ko04070);; Plant-pathogen interaction (ko04626)
	Unigene_068324	CIPK29	0.684265	-0.696112	normal	0.00700365	-3.44457	down	NAF domain	CBL-interacting protein kinase 29 OS=Oryza sativa subsp. japonica OX=39947 GN=CIPK29 PE=2 SV=1	CBL-interacting protein kinase 29-like [Aegilops tauschii subsp. tauschii]	molecular function: catalytic activity (GO:0003824);; biological process: metabolic process (GO:0008152);; biological process: cellular process (GO:0009987);; cellular component: cell (GO:0005623);; cellular component: cell part (GO:0044464);; cellular component: organelle (GO:0043226);; cellular component: cell junction (GO:0030054);; biological process: signaling (GO:0023052);; biological proce…	MAPK signaling pathway - plant (ko04016);; Phosphatidylinositol signaling system (ko04070);; Plant-pathogen interaction (ko04626)
	Unigene_153050	CIPK29	0.0612213	3.15136	normal	0.000967218	4.92123	up	--	CBL-interacting protein kinase 29 OS=Oryza sativa subsp. japonica OX=39947 GN=CIPK29 PE=2 SV=1	Os07g0678300, partial [Oryza sativa Japonica Group]	molecular function: catalytic activity (GO:0003824);; biological process: metabolic process (GO:0008152);; biological process: cellular process (GO:0009987);; cellular component: cell (GO:0005623);; cellular component: cell part (GO:0044464);; cellular component: organelle (GO:0043226);; cellular component: cell junction (GO:0030054);; biological process: signaling (GO:0023052);; biological proce…	--
	Unigene_527539	CIPK29	0.00581844	3.54193	up	0.000942095	4.33904	up	Protein kinase domain;; Protein tyrosine and serine/threonine kinase;; Kinase-like;; NAF domain	CBL-interacting protein kinase 29 OS=Oryza sativa subsp. japonica OX=39947 GN=CIPK29 PE=2 SV=1	CBL-interacting protein kinase 29-like [Aegilops tauschii subsp. tauschii]	molecular function: catalytic activity (GO:0003824);; biological process: metabolic process (GO:0008152);; biological process: cellular process (GO:0009987);; molecular function: binding (GO:0005488);; cellular component: cell (GO:0005623);; cellular component: cell part (GO:0044464);; cellular component: organelle (GO:0043226);; cellular component: cell junction (GO:0030054);; biological process…	--
Cyclic nucleotide-gated ion channel (CNGC)	Unigene_526818	CNGC14	0.0401782	2.9267	normal	0.000552315	4.72573	up	Ion transport protein;; Cyclic nucleotide-binding domain	Probable cyclic nucleotide-gated ion channel 14 OS=Arabidopsis thaliana OX=3702 GN=CNGC14 PE=2 SV=2	unnamed protein product [Triticum turgidum subsp. durum]	molecular function: transporter activity (GO:0005215);; biological process: localization (GO:0051179);; cellular component: membrane (GO:0016020)	Plant-pathogen interaction (ko04626)
	Unigene_604378	CNGC1	0.0767761	2.34128	normal	0.00890244	3.57267	up	Ion transport protein;; Cyclic nucleotide-binding domain	Cyclic nucleotide-gated ion channel 1 OS=Arabidopsis thaliana OX=3702 GN=CNGC1 PE=1 SV=1	cyclic nucleotide-gated ion channel 1 isoform X1 [Brachypodium distachyon]	molecular function: transporter activity (GO:0005215);; biological process: localization (GO:0051179);; cellular component: membrane (GO:0016020)	Plant-pathogen interaction (ko04626)
	Unigene_605430	CNGC5	0.0408114	3.15158	normal	0.000676861	4.83441	up	Ion transport protein;; Cyclic nucleotide-binding domain	Probable cyclic nucleotide-gated ion channel 5 OS=Arabidopsis thaliana OX=3702 GN=CNGC5 PE=2 SV=1	probable cyclic nucleotide-gated ion channel 5 [Brachypodium distachyon]	biological process: reproduction (GO:0000003);; biological process: cellular process (GO:0009987);; biological process: developmental process (GO:0032502);; biological process: single-organism process (GO:0044699);; biological process: cellular component organization or biogenesis (GO:0071840);; biological process: reproductive process (GO:0022414);; molecular function: transporter activity (GO:0…	--
Annexin (ANN)	Unigene_518670	ANN5	0.0749947	3.03289	normal	0.00041755	5.46433	up	Annexin	Annexin D5 OS=Arabidopsis thaliana OX=3702 GN=ANN5 PE=2 SV=2	hypothetical protein CFC21_065789 [Triticum aestivum]	biological process: reproduction (GO:0000003);; biological process: cellular process (GO:0009987);; biological process: developmental process (GO:0032502);; biological process: single-organism process (GO:0044699);; biological process: cellular component organization or biogenesis (GO:0071840);; biological process: response to stimulus (GO:0050896);; biological process: reproductive process (GO:0…	MAPK signaling pathway - plant (ko04016);; Phosphatidylinositol signaling system (ko04070);; Plant-pathogen interaction (ko04626)
	Unigene_596910	ANN4	0.0134598	2.77761	normal	4.05013e-05	5.74339	up	Annexin	Annexin D4 OS=Arabidopsis thaliana OX=3702 GN=ANN4 PE=1 SV=1	hypothetical protein CFC21_007244 [Triticum aestivum]	biological process: response to stimulus (GO:0050896);; molecular function: binding (GO:0005488);; cellular component: cell junction (GO:0030054);; cellular component: symplast (GO:0055044)	--
Calcium permeable stress-gated cation channel 1(CSC1)	Unigene_603038	CSC1	0.0991299	2.63196	normal	0.00524759	4.28308	up	Calcium-dependent channel, 7TM region, putative phosphate;; Late exocytosis, associated with Golgi transport;; Cytosolic domain of 10TM putative phosphate transporter	Calcium permeable stress-gated cation channel 1 OS=Arabidopsis thaliana OX=3702 GN=CSC1 PE=1 SV=1	putative membrane protein C2G11.09 [Hordeum vulgare]	molecular function: transporter activity (GO:0005215);; biological process: localization (GO:0051179);; cellular component: cell (GO:0005623);; cellular component: membrane (GO:0016020);; cellular component: cell part (GO:0044464);; biological process: response to stimulus (GO:0050896);; biological process: cellular process (GO:0009987);; biological process: biological regulation (GO:0065007);; b…	--
	Unigene_604162	CSC1	0.0126901	2.35112	normal	0.00391939	3.73398	up	Calcium-dependent channel, 7TM region, putative phosphate;; Cytosolic domain of 10TM putative phosphate transporter;; Late exocytosis, associated with Golgi transport	Calcium permeable stress-gated cation channel 1 OS=Arabidopsis thaliana OX=3702 GN=CSC1 PE=1 SV=1	calcium permeable stress-gated cation channel 1 isoform X1 [Brachypodium distachyon]	molecular function: transporter activity (GO:0005215);; biological process: localization (GO:0051179);; cellular component: cell (GO:0005623);; cellular component: membrane (GO:0016020);; cellular component: cell part (GO:0044464);; biological process: response to stimulus (GO:0050896);; biological process: cellular process (GO:0009987);; biological process: biological regulation (GO:0065007);; b…

## Sheet: Stems
Gene classification	#ID	Gene name	S0_vs_S3_DESeq2_FDR	S0_vs_S3_DESeq2_log2FC	S0_vs_S3_regulated	S0_vs_S6_DESeq2_FDR	S0_vs_S6_DESeq2_log2FC	S0_vs_S6_regulated	Pfam_annotation	Swissprot_annotation	nr_annotation	GO_second_level_annotation	KEGG_pathway_annotation
Receptor-like kinase (RLK)	Unigene_005107	RLK5	0.00805647	3.55009	up	0.1013	2.34714	normal	Protein kinase domain;; Protein tyrosine and serine/threonine kinase;; Leucine rich repeat;; Leucine Rich repeats (2 copies);; Leucine Rich Repeat;; Leucine rich repeat N-terminal domain;; Leucine Rich repeat	Receptor-like protein kinase 5 OS=Arabidopsis thaliana OX=3702 GN=RLK5 PE=1 SV=1	hypothetical protein CFC21_103831 [Triticum aestivum]	molecular function: catalytic activity (GO:0003824);; biological process: metabolic process (GO:0008152);; biological process: cellular process (GO:0009987);; molecular function: binding (GO:0005488)	--
	Unigene_073486	CAMRLK	0.154196	-1.66314	normal	0.000126461	-3.38245	down	Protein tyrosine and serine/threonine kinase;; Leucine rich repeat;; Protein kinase domain;; Leucine Rich repeats (2 copies);; Leucine Rich Repeat	Calmodulin-binding receptor kinase CaMRLK OS=Arabidopsis thaliana OX=3702 GN=CAMRLK PE=1 SV=1	calmodulin-binding receptor kinase CaMRLK [Brachypodium distachyon]	biological process: reproduction (GO:0000003);; biological process: reproductive process (GO:0022414);; biological process: developmental process (GO:0032502);; molecular function: catalytic activity (GO:0003824);; biological process: metabolic process (GO:0008152);; biological process: cellular process (GO:0009987);; molecular function: binding (GO:0005488);; biological process: response to stim…	Plant hormone signal transduction (ko04075)
	Unigene_194672	CAMRLK	0.2266	-1.30106	normal	9.18858e-05	-3.00104	down	Protein tyrosine and serine/threonine kinase;; Leucine rich repeat;; Protein kinase domain;; Leucine Rich repeats (2 copies);; Leucine Rich Repeat	Calmodulin-binding receptor kinase CaMRLK OS=Arabidopsis thaliana OX=3702 GN=CAMRLK PE=1 SV=1	calmodulin-binding receptor kinase CaMRLK [Brachypodium distachyon]	biological process: reproduction (GO:0000003);; biological process: reproductive process (GO:0022414);; biological process: developmental process (GO:0032502);; molecular function: catalytic activity (GO:0003824);; biological process: metabolic process (GO:0008152);; biological process: cellular process (GO:0009987);; molecular function: binding (GO:0005488);; biological process: response to stim…	Plant hormone signal transduction (ko04075)
	Unigene_506653	RLK7	0.000776152	-4.9263	down	0.0564567	-2.50855	normal	--	Receptor-like protein kinase 7 OS=Arabidopsis thaliana OX=3702 GN=RLK7 PE=1 SV=1	receptor-like protein kinase HAIKU2 [Aegilops tauschii subsp. tauschii]	biological process: reproduction (GO:0000003);; molecular function: signal transducer activity (GO:0004871);; molecular function: molecular transducer activity (GO:0060089);; biological process: cellular process (GO:0009987);; biological process: signaling (GO:0023052);; biological process: single-organism process (GO:0044699);; biological process: response to stimulus (GO:0050896);; biological p…	--
	Unigene_527612	RLK7	0.00102493	-3.71289	down	0.0165615	-2.49103	normal	Protein kinase domain;; Protein tyrosine and serine/threonine kinase;; Leucine rich repeat;; Leucine Rich repeats (2 copies);; Leucine Rich Repeat	Receptor-like protein kinase 7 OS=Arabidopsis thaliana OX=3702 GN=RLK7 PE=1 SV=1	predicted protein [Hordeum vulgare subsp. vulgare]	biological process: reproduction (GO:0000003);; molecular function: signal transducer activity (GO:0004871);; molecular function: molecular transducer activity (GO:0060089);; biological process: cellular process (GO:0009987);; biological process: signaling (GO:0023052);; biological process: single-organism process (GO:0044699);; biological process: response to stimulus (GO:0050896);; biological p…	--
Calmodulin-like protein (CML)	Unigene_036677	CML10	0.00309602	3.94208	up	0.0503286	2.60744	normal	EF hand;; EF hand;; EF-hand domain pair;; EF-hand domain;; EF-hand domain pair;; Secreted protein acidic and rich in cysteine Ca binding region	Probable calcium-binding protein CML10 OS=Oryza sativa subsp. japonica OX=39947 GN=CML10 PE=2 SV=1	unnamed protein product [Triticum aestivum]	molecular function: binding (GO:0005488)	Plant-pathogen interaction (ko04626)
	Unigene_186655	CML13	--	--	--	1.52923e-07	8.30467	up	EF hand;; EF-hand domain pair;; EF-hand domain;; EF-hand domain pair;; EF hand;; EF-hand domain;; Cytoskeletal-regulatory complex EF hand;; Dockerin type I domain;; Secreted protein acidic and rich in cysteine Ca binding region	Probable calcium-binding protein CML13 OS=Oryza sativa subsp. japonica OX=39947 GN=CML13 PE=2 SV=1	hypothetical protein CFC21_016007 [Triticum aestivum]	molecular function: binding (GO:0005488)	Plant-pathogen interaction (ko04626)
	Unigene_003177	CML14	0.00569534	-3.41242	down	0.110709	-1.99985	normal	EF hand;; EF-hand domain pair;; EF-hand domain;; EF hand;; EF-hand domain pair;; Cytoskeletal-regulatory complex EF hand	Probable calcium-binding protein CML14 OS=Oryza sativa subsp. japonica OX=39947 GN=CML14 PE=2 SV=1	putative calcium-binding protein CML14 [Panicum miliaceum]	molecular function: binding (GO:0005488)	Plant-pathogen interaction (ko04626)
	Unigene_507040	CML14	0.00196944	-3.40834	down	0.00226479	-2.47923	down	EF hand;; EF-hand domain pair;; EF hand;; EF-hand domain;; EF-hand domain pair	Probable calcium-binding protein CML14 OS=Oryza sativa subsp. japonica OX=39947 GN=CML14 PE=2 SV=1	hypothetical protein CFC21_041418 [Triticum aestivum]	molecular function: binding (GO:0005488)	Plant-pathogen interaction (ko04626)
	Unigene_186960	CML15	0.00208593	-3.44428	down	0.804545	-0.544728	normal	EF hand;; EF-hand domain pair;; EF hand;; EF-hand domain;; EF-hand domain pair;; Secreted protein acidic and rich in cysteine Ca binding region;; Dockerin type I domain	Probable calcium-binding protein CML15 OS=Oryza sativa subsp. japonica OX=39947 GN=CML15 PE=2 SV=1	polcalcin Jun o 2 [Hordeum vulgare]	molecular function: binding (GO:0005488);; cellular component: cell (GO:0005623);; cellular component: cell part (GO:0044464);; cellular component: organelle (GO:0043226);; biological process: response to stimulus (GO:0050896);; biological process: multicellular organismal process (GO:0032501);; biological process: developmental process (GO:0032502);; biological process: single-organism process (…	Plant-pathogen interaction (ko04626)
	Unigene_521256	CML15	0.00035098	-4.39024	down	0.0269973	-3.46857	normal	EF hand;; EF-hand domain pair;; EF hand;; EF-hand domain;; EF-hand domain pair;; Secreted protein acidic and rich in cysteine Ca binding region;; Dockerin type I domain	Probable calcium-binding protein CML15 OS=Oryza sativa subsp. japonica OX=39947 GN=CML15 PE=2 SV=1	unknown [Zea mays]	molecular function: binding (GO:0005488);; cellular component: cell (GO:0005623);; cellular component: cell part (GO:0044464);; cellular component: organelle (GO:0043226);; biological process: response to stimulus (GO:0050896);; biological process: multicellular organismal process (GO:0032501);; biological process: developmental process (GO:0032502);; biological process: single-organism process (…	Plant-pathogen interaction (ko04626)
	Unigene_046101	CML16	0.000276263	-4.77835	down	0.3465	-1.70018	normal	EF hand;; EF-hand domain pair;; EF hand;; EF-hand domain;; EF-hand domain pair;; Dockerin type I domain;; Secreted protein acidic and rich in cysteine Ca binding region	Probable calcium-binding protein CML16 OS=Oryza sativa subsp. japonica OX=39947 GN=CML16 PE=2 SV=1	predicted protein, partial [Hordeum vulgare subsp. vulgare]	molecular function: binding (GO:0005488);; cellular component: cell (GO:0005623);; cellular component: cell part (GO:0044464);; cellular component: organelle (GO:0043226);; cellular component: membrane (GO:0016020)	Plant-pathogen interaction (ko04626)
	Unigene_199398	CML16	0.00250327	-3.93621	down	0.268422	-1.72918	normal	EF hand;; EF hand;; EF-hand domain pair;; EF-hand domain;; EF-hand domain pair;; Secreted protein acidic and rich in cysteine Ca binding region;; Dockerin type I domain	Probable calcium-binding protein CML16 OS=Oryza sativa subsp. japonica OX=39947 GN=CML16 PE=2 SV=1	predicted protein, partial [Hordeum vulgare subsp. vulgare]	molecular function: binding (GO:0005488);; cellular component: cell (GO:0005623);; cellular component: cell part (GO:0044464);; cellular component: organelle (GO:0043226);; cellular component: membrane (GO:0016020)	Plant-pathogen interaction (ko04626)
	Unigene_311963	CML16	0.0041257	3.94215	up	0.00816046	3.36815	up	EF hand;; EF hand;; EF-hand domain pair;; EF-hand domain;; EF-hand domain pair	Probable calcium-binding protein CML16 OS=Oryza sativa subsp. japonica OX=39947 GN=CML16 PE=2 SV=1	predicted protein, partial [Hordeum vulgare subsp. vulgare]	molecular function: binding (GO:0005488);; cellular component: cell (GO:0005623);; cellular component: cell part (GO:0044464);; cellular component: organelle (GO:0043226);; cellular component: membrane (GO:0016020)	Plant-pathogen interaction (ko04626)
	Unigene_515274	CML16	0.000208478	-5.36594	down	0.0710977	-2.67389	normal	EF hand;; EF-hand domain pair;; EF hand;; EF-hand domain;; EF-hand domain pair;; Dockerin type I domain;; Secreted protein acidic and rich in cysteine Ca binding region	Probable calcium-binding protein CML16 OS=Oryza sativa subsp. japonica OX=39947 GN=CML16 PE=2 SV=1	predicted protein, partial [Hordeum vulgare subsp. vulgare]	molecular function: binding (GO:0005488);; cellular component: cell (GO:0005623);; cellular component: cell part (GO:0044464);; cellular component: organelle (GO:0043226);; cellular component: membrane (GO:0016020)	Plant-pathogen interaction (ko04626)
	Unigene_071223	CML18	--	--	--	4.52297e-10	10.6016	up	EF hand;; EF-hand domain pair;; EF hand;; EF-hand domain;; EF-hand domain pair;; Dockerin type I domain;; Secreted protein acidic and rich in cysteine Ca binding region	Probable calcium-binding protein CML18 OS=Oryza sativa subsp. japonica OX=39947 GN=CML18 PE=2 SV=1	predicted protein [Hordeum vulgare subsp. vulgare]	molecular function: binding (GO:0005488);; cellular component: cell (GO:0005623);; cellular component: cell part (GO:0044464);; cellular component: organelle (GO:0043226);; cellular component: membrane (GO:0016020)	Plant-pathogen interaction (ko04626)
	Unigene_193346	CML19	0.000281112	-5.21883	down	1.51017e-05	-5.44446	down	EF-hand domain pair;; EF hand;; EF-hand domain pair;; EF-hand domain;; EF hand	Putative calcium-binding protein CML19 OS=Oryza sativa subsp. japonica OX=39947 GN=CML19 PE=3 SV=1	hypothetical protein CFC21_038225 [Triticum aestivum]	biological process: response to stimulus (GO:0050896);; molecular function: binding (GO:0005488);; cellular component: cell (GO:0005623);; cellular component: cell part (GO:0044464);; cellular component: organelle (GO:0043226);; cellular component: membrane (GO:0016020)	Plant-pathogen interaction (ko04626)
	Unigene_518446	CML19	3.91424e-07	-7.1906	down	7.5422e-06	-5.37932	down	EF-hand domain pair;; EF hand;; EF-hand domain pair;; EF-hand domain;; EF hand	Putative calcium-binding protein CML19 OS=Oryza sativa subsp. japonica OX=39947 GN=CML19 PE=3 SV=1	hypothetical protein CFC21_044459 [Triticum aestivum]	biological process: response to stimulus (GO:0050896);; molecular function: binding (GO:0005488);; cellular component: cell (GO:0005623);; cellular component: cell part (GO:0044464);; cellular component: organelle (GO:0043226);; cellular component: membrane (GO:0016020)	Plant-pathogen interaction (ko04626)
	Unigene_169943	CML22	--	--	--	2.4028e-08	7.60755	up	EF hand;; EF-hand domain pair;; EF hand;; EF-hand domain;; EF-hand domain pair;; Cytoskeletal-regulatory complex EF hand	Probable calcium-binding protein CML22 OS=Oryza sativa subsp. japonica OX=39947 GN=CML22 PE=3 SV=1	hypothetical protein CFC21_017847 [Triticum aestivum]	molecular function: binding (GO:0005488);; cellular component: cell (GO:0005623);; cellular component: cell part (GO:0044464);; cellular component: organelle (GO:0043226);; biological process: response to stimulus (GO:0050896);; cellular component: membrane (GO:0016020);; cellular component: organelle part (GO:0044422);; cellular component: membrane part (GO:0044425)	Plant-pathogen interaction (ko04626)
	Unigene_185514	CML27	--	--	--	0.000130375	5.42379	up	EF hand;; EF-hand domain;; EF-hand domain pair;; EF hand;; EF-hand domain pair;; Cytoskeletal-regulatory complex EF hand	Probable calcium-binding protein CML27 OS=Oryza sativa subsp. japonica OX=39947 GN=CML27 PE=2 SV=1	--	biological process: cellular process (GO:0009987);; biological process: developmental process (GO:0032502);; biological process: single-organism process (GO:0044699);; biological process: cellular component organization or biogenesis (GO:0071840);; molecular function: binding (GO:0005488);; biological process: response to stimulus (GO:0050896)	Plant-pathogen interaction (ko04626)
	Unigene_321099	CML27	0.00010894	-4.17875	down	0.132427	-2.15802	normal	EF hand;; EF-hand domain;; EF-hand domain pair;; EF hand;; EF-hand domain pair;; Cytoskeletal-regulatory complex EF hand	Probable calcium-binding protein CML27 OS=Oryza sativa subsp. japonica OX=39947 GN=CML27 PE=2 SV=1	hypothetical protein CFC21_052114 [Triticum aestivum]	biological process: cellular process (GO:0009987);; biological process: developmental process (GO:0032502);; biological process: single-organism process (GO:0044699);; biological process: cellular component organization or biogenesis (GO:0071840);; molecular function: binding (GO:0005488);; biological process: response to stimulus (GO:0050896)	Plant-pathogen interaction (ko04626)
	Unigene_520771	CML27	4.45878e-05	-5.58303	down	0.0475577	-3.0737	normal	EF hand;; EF-hand domain;; EF-hand domain pair;; EF hand;; EF-hand domain pair;; Cytoskeletal-regulatory complex EF hand	Probable calcium-binding protein CML27 OS=Oryza sativa subsp. japonica OX=39947 GN=CML27 PE=2 SV=1	hypothetical protein CFC21_052114 [Triticum aestivum]	biological process: cellular process (GO:0009987);; biological process: developmental process (GO:0032502);; biological process: single-organism process (GO:0044699);; biological process: cellular component organization or biogenesis (GO:0071840);; molecular function: binding (GO:0005488);; biological process: response to stimulus (GO:0050896)	Plant-pathogen interaction (ko04626)
	Unigene_588216	CML27	0.000290895	-5.06001	down	0.301197	-2.10197	normal	EF hand;; EF-hand domain;; EF-hand domain pair;; EF hand;; EF-hand domain pair;; Cytoskeletal-regulatory complex EF hand	Probable calcium-binding protein CML27 OS=Oryza sativa subsp. japonica OX=39947 GN=CML27 PE=2 SV=1	hypothetical protein CFC21_052114 [Triticum aestivum]	biological process: cellular process (GO:0009987);; biological process: developmental process (GO:0032502);; biological process: single-organism process (GO:0044699);; biological process: cellular component organization or biogenesis (GO:0071840);; molecular function: binding (GO:0005488);; biological process: response to stimulus (GO:0050896)	Plant-pathogen interaction (ko04626)
	Unigene_168743	CML36	4.44183e-05	-5.29024	down	7.54037e-05	-4.04287	down	EF hand;; EF hand;; EF-hand domain;; EF-hand domain pair;; EF-hand domain pair	Probable calcium-binding protein CML36 OS=Arabidopsis thaliana OX=3702 GN=CML36 PE=2 SV=1	unnamed protein product [Triticum turgidum subsp. durum]	molecular function: binding (GO:0005488);; cellular component: cell (GO:0005623);; cellular component: membrane (GO:0016020);; cellular component: cell part (GO:0044464);; biological process: response to stimulus (GO:0050896);; biological process: multi-organism process (GO:0051704)	Plant-pathogen interaction (ko04626)
	Unigene_312338	CML36	0.00635502	-4.77886	down	0.0176328	-2.9623	normal	EF hand;; EF hand;; EF-hand domain;; EF-hand domain pair;; EF-hand domain pair	Probable calcium-binding protein CML36 OS=Arabidopsis thaliana OX=3702 GN=CML36 PE=2 SV=1	unnamed protein product [Triticum turgidum subsp. durum]	molecular function: binding (GO:0005488);; cellular component: cell (GO:0005623);; cellular component: membrane (GO:0016020);; cellular component: cell part (GO:0044464);; biological process: response to stimulus (GO:0050896);; biological process: multi-organism process (GO:0051704)	Plant-pathogen interaction (ko04626)
	Unigene_021550	CML45	0.00872303	-2.81413	down	9.45608e-07	-4.01494	down	EF hand;; EF hand;; EF-hand domain;; EF-hand domain pair;; EF-hand domain pair	Probable calcium-binding protein CML45 OS=Arabidopsis thaliana OX=3702 GN=CML45 PE=2 SV=1	hypothetical protein CFC21_066031 [Triticum aestivum]	molecular function: binding (GO:0005488);; cellular component: cell (GO:0005623);; cellular component: cell part (GO:0044464);; cellular component: organelle (GO:0043226)	MAPK signaling pathway - plant (ko04016);; Phosphatidylinositol signaling system (ko04070);; Plant-pathogen interaction (ko04626)
	Unigene_312810	CML8	0.00727275	3.13469	up	0.0456871	2.67544	normal	EF hand;; EF-hand domain;; EF hand;; EF hand;; EF-hand domain pair;; EF-hand domain;; EF hand;; EF-hand domain pair	Probable calcium-binding protein CML8 OS=Oryza sativa subsp. japonica OX=39947 GN=CML8 PE=2 SV=1	putative calcium-binding protein CML8 [Panicum miliaceum]	biological process: response to stimulus (GO:0050896);; molecular function: binding (GO:0005488);; cellular component: cell (GO:0005623);; cellular component: cell part (GO:0044464);; cellular component: membrane (GO:0016020);; biological process: cellular process (GO:0009987);; biological process: signaling (GO:0023052);; biological process: single-organism process (GO:0044699);; biological proc…	Plant-pathogen interaction (ko04626)
Ca2+-dependent protein kinase (CPK/CDPK)	Unigene_014799	CPK21	0.0170511	2.91092	normal	0.000382151	3.27374	up	Protein kinase domain;; EF hand;; EF-hand domain pair;; Protein tyrosine and serine/threonine kinase;; EF-hand domain;; EF hand;; EF-hand domain pair;; Lipopolysaccharide kinase (Kdo/WaaP) family;; Secreted protein acidic and rich in cysteine Ca binding region;; Phosphotransferase enzyme family;; Cytoskeletal-regulatory complex EF hand;; IBR domain, a half RING-finger domain	Calcium-dependent protein kinase 21 OS=Oryza sativa subsp. japonica OX=39947 GN=CPK21 PE=2 SV=1	calcium-dependent protein kinase 21-like [Aegilops tauschii subsp. tauschii]	biological process: response to stimulus (GO:0050896);; biological process: biological regulation (GO:0065007);; molecular function: catalytic activity (GO:0003824);; biological process: metabolic process (GO:0008152);; biological process: cellular process (GO:0009987);; molecular function: binding (GO:0005488);; cellular component: cell (GO:0005623);; cellular component: cell part (GO:0044464);;…	Plant-pathogen interaction (ko04626)
	Unigene_067689	CPK1	--	--	--	0.000516729	5.29892	up	Protein kinase domain;; Protein tyrosine and serine/threonine kinase;; Kinase-like	Calcium-dependent protein kinase 1 OS=Oryza sativa subsp. japonica OX=39947 GN=CPK1 PE=2 SV=1	unnamed protein product [Triticum turgidum subsp. durum]	biological process: response to stimulus (GO:0050896);; molecular function: catalytic activity (GO:0003824);; biological process: metabolic process (GO:0008152);; biological process: cellular process (GO:0009987);; molecular function: binding (GO:0005488);; cellular component: cell (GO:0005623);; cellular component: cell part (GO:0044464);; cellular component: organelle (GO:0043226);; cellular co…	Plant-pathogen interaction (ko04626)
	Unigene_182621	CPK12	0.010295	2.95738	normal	0.00257012	2.8363	up	Protein kinase domain;; Protein tyrosine and serine/threonine kinase	Calcium-dependent protein kinase 12 OS=Oryza sativa subsp. japonica OX=39947 GN=CPK12 PE=2 SV=2	predicted protein [Hordeum vulgare subsp. vulgare]	biological process: response to stimulus (GO:0050896);; molecular function: catalytic activity (GO:0003824);; biological process: metabolic process (GO:0008152);; biological process: cellular process (GO:0009987);; molecular function: binding (GO:0005488);; cellular component: cell (GO:0005623);; cellular component: cell part (GO:0044464);; cellular component: organelle (GO:0043226);; cellular co…	Plant-pathogen interaction (ko04626)
	Unigene_321680	CPK12	8.98448e-05	5.02607	up	0.000141152	4.36845	up	Protein kinase domain;; EF hand;; EF-hand domain pair;; EF-hand domain;; EF hand;; EF-hand domain pair;; Protein tyrosine and serine/threonine kinase;; Secreted protein acidic and rich in cysteine Ca binding region;; Ca2+ insensitive EF hand	Calcium-dependent protein kinase 12 OS=Oryza sativa subsp. japonica OX=39947 GN=CPK12 PE=2 SV=2	calcium-dependent protein kinase [Hordeum vulgare]	biological process: response to stimulus (GO:0050896);; molecular function: catalytic activity (GO:0003824);; biological process: metabolic process (GO:0008152);; biological process: cellular process (GO:0009987);; molecular function: binding (GO:0005488);; cellular component: cell (GO:0005623);; cellular component: cell part (GO:0044464);; cellular component: organelle (GO:0043226);; cellular co…	Plant-pathogen interaction (ko04626)
	Unigene_019609	CPK13	0.207576	-1.34106	normal	0.0013326	-2.06887	down	PPR repeat;; PPR repeat family;; PPR repeat;; Pentatricopeptide repeat domain;; DYW family of nucleic acid deaminases;; Pentacotripeptide-repeat region of PRORP;; Protein kinase domain;; EF hand;; EF-hand domain pair;; Protein tyrosine and serine/threonine kinase;; EF-hand domain;; EF hand;; EF-hand domain pair;; Cytoskeletal-regulatory complex EF hand;; Lipopolysaccharide kinase (Kdo/WaaP) famil…	Calcium-dependent protein kinase 13 OS=Oryza sativa subsp. japonica OX=39947 GN=CPK13 PE=2 SV=1	predicted protein [Hordeum vulgare subsp. vulgare]	molecular function: catalytic activity (GO:0003824);; biological process: metabolic process (GO:0008152);; biological process: cellular process (GO:0009987);; molecular function: binding (GO:0005488)	Plant-pathogen interaction (ko04626)
	Unigene_069443	CPK20	0.0025694	3.71666	up	0.015386	2.75992	normal	Protein kinase domain;; EF hand;; EF-hand domain pair;; EF-hand domain;; EF hand;; EF-hand domain pair;; Protein tyrosine and serine/threonine kinase;; Cytoskeletal-regulatory complex EF hand;; Lipopolysaccharide kinase (Kdo/WaaP) family	Calcium-dependent protein kinase 10 OS=Oryza sativa subsp. japonica OX=39947 GN=CPK10 PE=2 SV=1	hypothetical protein CFC21_068067, partial [Triticum aestivum]	biological process: response to stimulus (GO:0050896);; molecular function: catalytic activity (GO:0003824);; biological process: metabolic process (GO:0008152);; biological process: cellular process (GO:0009987);; molecular function: binding (GO:0005488);; cellular component: cell (GO:0005623);; cellular component: cell part (GO:0044464);; cellular component: organelle (GO:0043226);; cellular co…	Plant-pathogen interaction (ko04626)
	Unigene_071149	CPK20	0.00807528	3.68606	up	0.0123973	3.32331	normal	EF hand;; EF-hand domain pair;; Protein kinase domain;; EF-hand domain;; EF-hand domain pair;; EF hand;; Cytoskeletal-regulatory complex EF hand;; Secreted protein acidic and rich in cysteine Ca binding region	Calcium-dependent protein kinase 20 OS=Oryza sativa subsp. japonica OX=39947 GN=CPK20 PE=2 SV=2	calcium-dependent protein kinase 8 [Brachypodium distachyon]	biological process: response to stimulus (GO:0050896);; molecular function: catalytic activity (GO:0003824);; biological process: metabolic process (GO:0008152);; biological process: cellular process (GO:0009987);; molecular function: binding (GO:0005488);; cellular component: cell (GO:0005623);; cellular component: cell part (GO:0044464);; cellular component: organelle (GO:0043226);; cellular co…	Plant-pathogen interaction (ko04626)
	Unigene_326032	CPK20	0.000159383	5.01466	up	0.00105554	3.89556	up	Protein kinase domain;; Protein tyrosine and serine/threonine kinase;; EF hand;; EF-hand domain pair;; EF hand;; EF-hand domain pair;; EF-hand domain;; Kinase-like;; Secreted protein acidic and rich in cysteine Ca binding region;; Lipopolysaccharide kinase (Kdo/WaaP) family;; Cytoskeletal-regulatory complex EF hand	Calcium-dependent protein kinase 20 OS=Oryza sativa subsp. japonica OX=39947 GN=CPK20 PE=2 SV=2	predicted protein [Hordeum vulgare subsp. vulgare]	biological process: response to stimulus (GO:0050896);; molecular function: catalytic activity (GO:0003824);; biological process: metabolic process (GO:0008152);; biological process: cellular process (GO:0009987);; molecular function: binding (GO:0005488);; cellular component: cell (GO:0005623);; cellular component: cell part (GO:0044464);; cellular component: organelle (GO:0043226);; cellular co…	Plant-pathogen interaction (ko04626)
	Unigene_317568	CPK24	--	--	--	0.000214812	4.83736	up	EF-hand domain pair;; EF hand;; EF-hand domain;; EF-hand domain pair;; EF hand;; Cytoskeletal-regulatory complex EF hand;; Protein kinase domain;; Protein tyrosine and serine/threonine kinase;; Lipopolysaccharide kinase (Kdo/WaaP) family;; Protein kinase domain	Calcium-dependent protein kinase 24 OS=Oryza sativa subsp. japonica OX=39947 GN=CPK24 PE=1 SV=1	unnamed protein product [Triticum turgidum subsp. durum]	biological process: response to stimulus (GO:0050896);; biological process: biological regulation (GO:0065007);; molecular function: catalytic activity (GO:0003824);; biological process: metabolic process (GO:0008152);; biological process: cellular process (GO:0009987);; molecular function: binding (GO:0005488);; cellular component: cell (GO:0005623);; cellular component: cell part (GO:0044464);;…	Plant-pathogen interaction (ko04626)
	Unigene_593828	CPK3	3.54322e-05	4.80773	up	0.000131893	3.73276	up	Protein kinase domain;; EF hand;; EF-hand domain pair;; EF-hand domain pair;; EF-hand domain;; EF hand;; Secreted protein acidic and rich in cysteine Ca binding region;; Protein tyrosine and serine/threonine kinase;; Cytoskeletal-regulatory complex EF hand	Calcium-dependent protein kinase 3 OS=Oryza sativa subsp. japonica OX=39947 GN=CPK3 PE=2 SV=1	calcium-dependent protein kinase 3 isoform X2 [Brachypodium distachyon]	biological process: response to stimulus (GO:0050896);; molecular function: catalytic activity (GO:0003824);; biological process: metabolic process (GO:0008152);; biological process: cellular process (GO:0009987);; molecular function: binding (GO:0005488);; cellular component: cell (GO:0005623);; cellular component: cell part (GO:0044464);; cellular component: organelle (GO:0043226);; cellular co…	Plant-pathogen interaction (ko04626)
	Unigene_070220	CPK4	--	--	--	4.7405e-07	8.83008	up	Protein kinase domain;; Protein tyrosine and serine/threonine kinase;; EF hand;; EF hand;; EF-hand domain pair;; EF-hand domain;; EF-hand domain pair;; Kinase-like;; Secreted protein acidic and rich in cysteine Ca binding region	Calcium-dependent protein kinase 4 OS=Oryza sativa subsp. japonica OX=39947 GN=CPK4 PE=2 SV=1	calcium-dependent protein kinase 4 [Aegilops tauschii subsp. tauschii]	biological process: response to stimulus (GO:0050896);; biological process: biological regulation (GO:0065007);; molecular function: catalytic activity (GO:0003824);; biological process: metabolic process (GO:0008152);; biological process: cellular process (GO:0009987);; molecular function: binding (GO:0005488);; cellular component: cell (GO:0005623);; cellular component: cell part (GO:0044464);;…	Plant-pathogen interaction (ko04626)
	Unigene_519741	CPK4	5.69662e-06	-5.16953	down	0.0135663	-3.2088	normal	Protein kinase domain;; Protein tyrosine and serine/threonine kinase;; EF hand;; EF hand;; EF-hand domain;; EF-hand domain pair;; EF-hand domain pair;; Protein kinase domain;; Protein tyrosine and serine/threonine kinase	Calcium-dependent protein kinase 4 OS=Oryza sativa subsp. japonica OX=39947 GN=CPK4 PE=2 SV=1	calcium-dependent protein kinase 4 isoform X1 [Brachypodium distachyon]	biological process: response to stimulus (GO:0050896);; biological process: biological regulation (GO:0065007);; molecular function: catalytic activity (GO:0003824);; biological process: metabolic process (GO:0008152);; biological process: cellular process (GO:0009987);; molecular function: binding (GO:0005488);; cellular component: cell (GO:0005623);; cellular component: cell part (GO:0044464);;…	Plant-pathogen interaction (ko04626)
	Unigene_595638	CPK4	2.01824e-05	-5.21134	down	0.00391316	-3.66798	down	Protein kinase domain;; Protein tyrosine and serine/threonine kinase;; EF hand;; EF hand;; EF-hand domain pair;; EF-hand domain;; EF-hand domain pair;; Kinase-like;; Secreted protein acidic and rich in cysteine Ca binding region	Calcium-dependent protein kinase 4 OS=Oryza sativa subsp. japonica OX=39947 GN=CPK4 PE=2 SV=1	--	biological process: response to stimulus (GO:0050896);; biological process: biological regulation (GO:0065007);; molecular function: catalytic activity (GO:0003824);; biological process: metabolic process (GO:0008152);; biological process: cellular process (GO:0009987);; molecular function: binding (GO:0005488);; cellular component: cell (GO:0005623);; cellular component: cell part (GO:0044464);;…	Plant-pathogen interaction (ko04626)
	Unigene_075896	CPK7	--	--	--	2.36953e-08	9.75601	up	Protein kinase domain;; Protein tyrosine and serine/threonine kinase;; EF hand;; EF-hand domain pair;; EF-hand domain;; EF-hand domain pair;; EF hand;; Lipopolysaccharide kinase (Kdo/WaaP) family	Calcium-dependent protein kinase 7 OS=Oryza sativa subsp. japonica OX=39947 GN=CPK7 PE=2 SV=2	PREDICTED: calcium-dependent protein kinase isoform 11 [Oryza brachyantha]	biological process: response to stimulus (GO:0050896);; molecular function: catalytic activity (GO:0003824);; biological process: metabolic process (GO:0008152);; biological process: cellular process (GO:0009987);; molecular function: binding (GO:0005488);; cellular component: cell (GO:0005623);; cellular component: cell part (GO:0044464);; cellular component: organelle (GO:0043226);; cellular co…	Plant-pathogen interaction (ko04626)
Calmodulin-binding transcription activator (CAMTA)	Unigene_191952	CAMTA2	--	--	--	0.000522535	4.21765	up	--	Calmodulin-binding transcription activator 2 OS=Arabidopsis thaliana OX=3702 GN=CAMTA2 PE=1 SV=1	hypothetical protein BRADI_3g23800v3 [Brachypodium distachyon]	molecular function: nucleic acid binding transcription factor activity (GO:0001071);; biological process: biological regulation (GO:0065007);; biological process: metabolic process (GO:0008152);; biological process: cellular process (GO:0009987);; biological process: response to stimulus (GO:0050896);; molecular function: binding (GO:0005488);; cellular component: cell (GO:0005623);; cellular com…	MAPK signaling pathway - plant (ko04016);; Phosphatidylinositol signaling system (ko04070);; Plant-pathogen interaction (ko04626)
	Unigene_325354	CAMTA2	--	--	--	4.93545e-08	8.70872	up	Ankyrin repeats (3 copies);; IQ calmodulin-binding motif;; IPT/TIG domain;; Ankyrin repeat	Calmodulin-binding transcription activator 2 OS=Arabidopsis thaliana OX=3702 GN=CAMTA2 PE=1 SV=1	Calmodulin-binding transcription activator 2 [Hordeum vulgare]	molecular function: nucleic acid binding transcription factor activity (GO:0001071);; biological process: biological regulation (GO:0065007);; biological process: metabolic process (GO:0008152);; biological process: cellular process (GO:0009987);; biological process: response to stimulus (GO:0050896);; molecular function: binding (GO:0005488);; cellular component: cell (GO:0005623);; cellular com…	MAPK signaling pathway - plant (ko04016);; Phosphatidylinositol signaling system (ko04070);; Plant-pathogen interaction (ko04626)
	Unigene_075806	CAMTA3	--	--	--	1.04877e-06	7.92515	up	IQ calmodulin-binding motif;; IPT/TIG domain;; Ankyrin repeats (3 copies);; CG-1 domain	Calmodulin-binding transcription activator 3 OS=Arabidopsis thaliana OX=3702 GN=CAMTA3 PE=1 SV=1	calmodulin-binding transcription activator 3 isoform X1 [Brachypodium distachyon]	molecular function: nucleic acid binding transcription factor activity (GO:0001071);; biological process: biological regulation (GO:0065007);; biological process: metabolic process (GO:0008152);; biological process: cellular process (GO:0009987);; biological process: response to stimulus (GO:0050896);; molecular function: binding (GO:0005488);; cellular component: cell (GO:0005623);; cellular com…	Plant hormone signal transduction (ko04075)
	Unigene_199184	CAMTA3	0.00231966	3.98966	up	0.0427399	2.81338	normal	CG-1 domain;; NB-ARC domain;; IQ calmodulin-binding motif;; IPT/TIG domain;; Ankyrin repeats (3 copies);; Ankyrin repeats (many copies)	Calmodulin-binding transcription activator 3 OS=Arabidopsis thaliana OX=3702 GN=CAMTA3 PE=1 SV=1	hypothetical protein CFC21_022410 [Triticum aestivum]	molecular function: nucleic acid binding transcription factor activity (GO:0001071);; biological process: biological regulation (GO:0065007);; biological process: metabolic process (GO:0008152);; biological process: cellular process (GO:0009987);; biological process: response to stimulus (GO:0050896);; molecular function: binding (GO:0005488);; cellular component: cell (GO:0005623);; cellular com…	MAPK signaling pathway - plant (ko04016);; Phosphatidylinositol signaling system (ko04070);; Plant-pathogen interaction (ko04626)
	Unigene_325953	CAMTA3	--	--	--	7.51181e-10	8.80518	up	Ankyrin repeats (3 copies);; IQ calmodulin-binding motif;; IPT/TIG domain;; CG-1 domain	Calmodulin-binding transcription activator 3 OS=Arabidopsis thaliana OX=3702 GN=CAMTA3 PE=1 SV=1	calmodulin-binding transcription activator 3 isoform X1 [Brachypodium distachyon]	molecular function: nucleic acid binding transcription factor activity (GO:0001071);; biological process: biological regulation (GO:0065007);; biological process: metabolic process (GO:0008152);; biological process: cellular process (GO:0009987);; biological process: response to stimulus (GO:0050896);; molecular function: binding (GO:0005488);; cellular component: cell (GO:0005623);; cellular com…	MAPK signaling pathway - plant (ko04016);; Phosphatidylinositol signaling system (ko04070);; Plant-pathogen interaction (ko04626)
	Unigene_198262	CAMTA3	0.045516	-1.95329	normal	0.00224021	-2.0095	down	Ankyrin repeats (3 copies);; IPT/TIG domain;; IQ calmodulin-binding motif;; CG-1 domain	Calmodulin-binding transcription activator 3 OS=Arabidopsis thaliana OX=3702 GN=CAMTA3 PE=1 SV=1	calmodulin-binding transcription activator 3 isoform X2 [Brachypodium distachyon]	molecular function: nucleic acid binding transcription factor activity (GO:0001071);; biological process: biological regulation (GO:0065007);; biological process: metabolic process (GO:0008152);; biological process: cellular process (GO:0009987);; biological process: response to stimulus (GO:0050896);; molecular function: binding (GO:0005488);; cellular component: cell (GO:0005623);; cellular com…	--
	Unigene_605479	CAMTA3	0.00343392	-3.09569	down	0.0913613	-1.94217	normal	Ankyrin repeats (3 copies);; IQ calmodulin-binding motif;; IPT/TIG domain;; CG-1 domain	Calmodulin-binding transcription activator 3 OS=Arabidopsis thaliana OX=3702 GN=CAMTA3 PE=1 SV=1	calmodulin-binding transcription activator 3 isoform X1 [Brachypodium distachyon]	molecular function: nucleic acid binding transcription factor activity (GO:0001071);; biological process: biological regulation (GO:0065007);; biological process: metabolic process (GO:0008152);; biological process: cellular process (GO:0009987);; biological process: response to stimulus (GO:0050896);; molecular function: binding (GO:0005488);; cellular component: cell (GO:0005623);; cellular com…	--
	Unigene_196297	CAMTA4	--	--	--	0.00356673	3.33002	up	Ankyrin repeats (many copies);; IQ calmodulin-binding motif;; IPT/TIG domain;; Ankyrin repeats (3 copies);; Ankyrin repeat;; CG-1 domain	Calmodulin-binding transcription activator 4 OS=Arabidopsis thaliana OX=3702 GN=CAMTA4 PE=1 SV=1	hypothetical protein CFC21_029925 [Triticum aestivum]	molecular function: nucleic acid binding transcription factor activity (GO:0001071);; biological process: biological regulation (GO:0065007);; biological process: metabolic process (GO:0008152);; biological process: cellular process (GO:0009987);; molecular function: binding (GO:0005488);; cellular component: cell (GO:0005623);; cellular component: cell part (GO:0044464);; cellular component: org…	Plant hormone signal transduction (ko04075)
	Unigene_020071	CAMTA4	--	--	--	7.06767e-07	7.06182	up	CG-1 domain;; Ankyrin repeats (many copies);; IQ calmodulin-binding motif;; Ankyrin repeat	Calmodulin-binding transcription activator 4 OS=Arabidopsis thaliana OX=3702 GN=CAMTA4 PE=1 SV=1	unnamed protein product [Triticum aestivum]	molecular function: binding (GO:0005488)	--
Calcineurin B-like protein (CBL)	Unigene_317249	CBL2	0.0009917	3.50578	up	0.0043833	2.56318	up	EF hand;; EF-hand domain pair;; EF-hand domain;; EF hand;; EF-hand domain pair	Calcineurin B-like protein 2 OS=Oryza sativa subsp. japonica OX=39947 GN=CBL2 PE=2 SV=1	CBL2 [Stipa purpurea]	cellular component: cell (GO:0005623);; cellular component: organelle (GO:0043226);; cellular component: cell part (GO:0044464);; molecular function: binding (GO:0005488);; cellular component: membrane (GO:0016020);; cellular component: organelle part (GO:0044422);; cellular component: macromolecular complex (GO:0032991);; biological process: cellular process (GO:0009987);; biological process: si…	Plant hormone signal transduction (ko04075)
	Unigene_190645	CBL3	0.197996	2.23205	normal	0.00501562	4.57299	up	EF hand;; EF-hand domain pair;; EF-hand domain;; EF hand;; Retrotransposon gag protein;; EF-hand domain pair	Calcineurin B-like protein 3 OS=Oryza sativa subsp. japonica OX=39947 GN=CBL3 PE=1 SV=1	CBL2 [Stipa purpurea]	cellular component: cell (GO:0005623);; cellular component: organelle (GO:0043226);; cellular component: cell part (GO:0044464);; molecular function: binding (GO:0005488);; cellular component: membrane (GO:0016020);; cellular component: organelle part (GO:0044422);; cellular component: macromolecular complex (GO:0032991);; biological process: cellular process (GO:0009987);; biological process: si…	--
	Unigene_195974	CBL4	0.305806	-1.39091	normal	0.000348312	-2.70663	down	EF hand;; EF-hand domain;; EF-hand domain pair;; EF hand	Calcineurin B-like protein 4 OS=Oryza sativa subsp. japonica OX=39947 GN=CBL4 PE=1 SV=1	calcineurin B-like protein 4 [Aegilops tauschii subsp. tauschii]	molecular function: catalytic activity (GO:0003824);; biological process: metabolic process (GO:0008152);; biological process: cellular process (GO:0009987);; molecular function: binding (GO:0005488);; biological process: response to stimulus (GO:0050896);; cellular component: cell (GO:0005623);; cellular component: cell part (GO:0044464);; cellular component: macromolecular complex (GO:0032991);…	MAPK signaling pathway - plant (ko04016);; Phosphatidylinositol signaling system (ko04070);; Plant-pathogen interaction (ko04626)
	Unigene_022840	CBL6	0.00529157	3.80599	up	0.0643368	2.58128	normal	EF hand;; EF-hand domain;; EF hand;; EF hand;; EF-hand domain pair;; EF hand	Calcineurin B-like protein 6 OS=Oryza sativa subsp. japonica OX=39947 GN=CBL6 PE=2 SV=1	calcineurin B-like protein 6 [Hordeum vulgare subsp. spontaneum]	molecular function: binding (GO:0005488)	MAPK signaling pathway - plant (ko04016);; Phosphatidylinositol signaling system (ko04070);; Plant-pathogen interaction (ko04626)
CBL-interaction protein kinase (CIPK)	Unigene_071701	CIPK1	--	--	--	9.51513e-08	7.42716	up	Protein kinase domain;; Protein tyrosine and serine/threonine kinase;; NAF domain;; Kinase-like	CBL-interacting protein kinase 1 OS=Oryza sativa subsp. japonica OX=39947 GN=CIPK1 PE=2 SV=1	CBL-interacting protein kinase 1 isoform X1 [Brachypodium distachyon]	biological process: response to stimulus (GO:0050896);; molecular function: catalytic activity (GO:0003824);; biological process: metabolic process (GO:0008152);; biological process: cellular process (GO:0009987);; molecular function: binding (GO:0005488);; cellular component: cell (GO:0005623);; cellular component: cell part (GO:0044464);; cellular component: organelle (GO:0043226);; cellular co…	MAPK signaling pathway - plant (ko04016);; Phosphatidylinositol signaling system (ko04070);; Plant-pathogen interaction (ko04626)
	Unigene_194530	CIPK1	0.000148476	-3.87014	down	0.000598531	-3.16636	down	Protein kinase domain;; Protein tyrosine and serine/threonine kinase;; NAF domain;; Kinase-like	CBL-interacting protein kinase 1 OS=Oryza sativa subsp. japonica OX=39947 GN=CIPK1 PE=2 SV=1	CBL-interacting protein kinase 1 isoform X1 [Brachypodium distachyon]	biological process: response to stimulus (GO:0050896);; molecular function: catalytic activity (GO:0003824);; biological process: metabolic process (GO:0008152);; biological process: cellular process (GO:0009987);; molecular function: binding (GO:0005488);; cellular component: cell (GO:0005623);; cellular component: cell part (GO:0044464);; cellular component: organelle (GO:0043226);; cellular co…	--
	Unigene_523055	CIPK1	0.0051335	-3.52592	down	0.0440856	-3.46729	normal	Protein kinase domain;; Protein tyrosine and serine/threonine kinase;; NAF domain;; Kinase-like;; Kinase associated domain 1	CBL-interacting protein kinase 1 OS=Oryza sativa subsp. japonica OX=39947 GN=CIPK1 PE=2 SV=1	CBL-interacting protein kinase 1 isoform X1 [Brachypodium distachyon]	biological process: response to stimulus (GO:0050896);; molecular function: catalytic activity (GO:0003824);; biological process: metabolic process (GO:0008152);; biological process: cellular process (GO:0009987);; molecular function: binding (GO:0005488);; cellular component: cell (GO:0005623);; cellular component: cell part (GO:0044464);; cellular component: organelle (GO:0043226);; cellular co…	--
	Unigene_016291	CIPK2	7.84411e-05	4.89874	up	0.000198001	4.24461	up	Protein kinase domain;; NAF domain;; Protein tyrosine and serine/threonine kinase;; Protein kinase domain;; Protein tyrosine and serine/threonine kinase	CBL-interacting protein kinase 2 OS=Oryza sativa subsp. japonica OX=39947 GN=CIPK2 PE=2 SV=1	CBL-interacting protein kinase 2 [Setaria viridis]	biological process: response to stimulus (GO:0050896);; molecular function: catalytic activity (GO:0003824);; biological process: metabolic process (GO:0008152);; biological process: cellular process (GO:0009987);; molecular function: binding (GO:0005488);; cellular component: cell (GO:0005623);; cellular component: cell part (GO:0044464);; biological process: signaling (GO:0023052);; biological …	Plant hormone signal transduction (ko04075)
	Unigene_179547	CIPK2	--	--	--	1.00376e-08	9.22644	up	Protein kinase domain;; Protein tyrosine and serine/threonine kinase	CBL-interacting protein kinase 2 OS=Oryza sativa subsp. japonica OX=39947 GN=CIPK2 PE=2 SV=1	CBL-interacting protein kinase 2 [Hordeum vulgare subsp. spontaneum]	biological process: response to stimulus (GO:0050896);; molecular function: catalytic activity (GO:0003824);; biological process: metabolic process (GO:0008152);; biological process: cellular process (GO:0009987);; molecular function: binding (GO:0005488);; cellular component: cell (GO:0005623);; cellular component: cell part (GO:0044464);; biological process: signaling (GO:0023052);; biological …	--
	Unigene_315091	CIPK2	1.36919e-06	5.99393	up	0.0123794	4.54965	normal	Protein kinase domain;; Protein tyrosine and serine/threonine kinase;; NAF domain;; Kinase-like	CBL-interacting protein kinase 2 OS=Oryza sativa subsp. japonica OX=39947 GN=CIPK2 PE=2 SV=1	CBL-interacting protein kinase 2 [Hordeum vulgare subsp. spontaneum]	biological process: response to stimulus (GO:0050896);; molecular function: catalytic activity (GO:0003824);; biological process: metabolic process (GO:0008152);; biological process: cellular process (GO:0009987);; molecular function: binding (GO:0005488);; cellular component: cell (GO:0005623);; cellular component: cell part (GO:0044464);; biological process: signaling (GO:0023052);; biological …	--
	Unigene_523712	CIPK2	1.85286e-05	5.73441	up	0.000426026	4.9329	up	Protein kinase domain;; Protein tyrosine and serine/threonine kinase;; Kinase-like;; NAF domain	CBL-interacting protein kinase 2 OS=Oryza sativa subsp. japonica OX=39947 GN=CIPK2 PE=2 SV=1	CBL-interacting protein kinase 2 [Hordeum vulgare subsp. spontaneum]	biological process: response to stimulus (GO:0050896);; molecular function: catalytic activity (GO:0003824);; biological process: metabolic process (GO:0008152);; biological process: cellular process (GO:0009987);; molecular function: binding (GO:0005488);; cellular component: cell (GO:0005623);; cellular component: cell part (GO:0044464);; biological process: signaling (GO:0023052);; biological …	--
	Unigene_047345	CIPK4	0.00077433	4.04827	up	0.340989	0.994697	normal	Protein kinase domain;; NAF domain;; Protein tyrosine and serine/threonine kinase	CBL-interacting protein kinase 4 OS=Oryza sativa subsp. japonica OX=39947 GN=CIPK4 PE=2 SV=2	hypothetical protein CFC21_064314 [Triticum aestivum]	molecular function: catalytic activity (GO:0003824);; biological process: metabolic process (GO:0008152);; biological process: cellular process (GO:0009987);; molecular function: binding (GO:0005488);; cellular component: cell (GO:0005623);; cellular component: cell part (GO:0044464);; cellular component: organelle (GO:0043226);; biological process: response to stimulus (GO:0050896);; biological …	--
	Unigene_321715	CIPK4	3.39057e-07	6.15492	up	5.11901e-05	5.51741	up	Protein kinase domain;; Protein tyrosine and serine/threonine kinase;; NAF domain;; Kinase-like	CBL-interacting protein kinase 4 OS=Oryza sativa subsp. japonica OX=39947 GN=CIPK4 PE=2 SV=2	hypothetical protein CFC21_064314 [Triticum aestivum]	molecular function: catalytic activity (GO:0003824);; biological process: metabolic process (GO:0008152);; biological process: cellular process (GO:0009987);; molecular function: binding (GO:0005488);; cellular component: cell (GO:0005623);; cellular component: cell part (GO:0044464);; cellular component: organelle (GO:0043226);; biological process: response to stimulus (GO:0050896);; biological …	--
	Unigene_324457	CIPK7	--	--	--	1.1019e-07	8.41114	up	Protein kinase domain;; Protein tyrosine and serine/threonine kinase;; NAF domain	CBL-interacting protein kinase 7 OS=Oryza sativa subsp. japonica OX=39947 GN=CIPK7 PE=2 SV=1	hypothetical protein CFC21_079396 [Triticum aestivum]	molecular function: catalytic activity (GO:0003824);; biological process: metabolic process (GO:0008152);; biological process: cellular process (GO:0009987);; molecular function: binding (GO:0005488);; cellular component: cell (GO:0005623);; cellular component: cell part (GO:0044464);; cellular component: organelle (GO:0043226);; biological process: response to stimulus (GO:0050896);; biological …	--
	Unigene_067449	CIPK8	--	--	--	3.62633e-07	9.00861	up	Protein kinase domain;; Protein tyrosine and serine/threonine kinase;; NAF domain;; Kinase-like	CBL-interacting protein kinase 8 OS=Oryza sativa subsp. japonica OX=39947 GN=CIPK8 PE=2 SV=1	hypothetical protein CFC21_047166 [Triticum aestivum]	molecular function: catalytic activity (GO:0003824);; biological process: metabolic process (GO:0008152);; biological process: cellular process (GO:0009987);; molecular function: binding (GO:0005488);; biological process: signaling (GO:0023052);; biological process: single-organism process (GO:0044699);; biological process: response to stimulus (GO:0050896);; biological process: biological regula…	MAPK signaling pathway - plant (ko04016);; Phosphatidylinositol signaling system (ko04070);; Plant-pathogen interaction (ko04626)
	Unigene_001085	CIPK9	0.0227868	-2.39625	normal	0.00255919	-2.20479	down	Protein kinase domain;; Protein tyrosine and serine/threonine kinase;; NAF domain;; Kinase-like	CBL-interacting protein kinase 9 OS=Oryza sativa subsp. japonica OX=39947 GN=CIPK9 PE=2 SV=1	CBL-interacting protein kinase 9 [Aegilops tauschii subsp. tauschii]	molecular function: catalytic activity (GO:0003824);; biological process: metabolic process (GO:0008152);; biological process: cellular process (GO:0009987);; molecular function: binding (GO:0005488);; cellular component: cell (GO:0005623);; cellular component: cell part (GO:0044464);; biological process: response to stimulus (GO:0050896);; biological process: signaling (GO:0023052);; biological …	MAPK signaling pathway - plant (ko04016);; Phosphatidylinositol signaling system (ko04070);; Plant-pathogen interaction (ko04626)
	Unigene_073013	CIPK9	--	--	--	5.61924e-09	8.65552	up	NAF domain;; Protein kinase domain;; Protein kinase domain;; Protein tyrosine and serine/threonine kinase;; Kinase-like	CBL-interacting protein kinase 9 OS=Oryza sativa subsp. japonica OX=39947 GN=CIPK9 PE=2 SV=1	CBL-interacting protein kinase 9 [Triticum urartu]	molecular function: catalytic activity (GO:0003824);; biological process: metabolic process (GO:0008152);; biological process: cellular process (GO:0009987);; molecular function: binding (GO:0005488);; cellular component: cell (GO:0005623);; cellular component: cell part (GO:0044464);; biological process: response to stimulus (GO:0050896);; biological process: signaling (GO:0023052);; biological …	--
	Unigene_071544	CIPK10	2.81418e-09	9.14466	up	--	--	--	Protein kinase domain;; Protein tyrosine and serine/threonine kinase;; NAF domain;; Kinase-like	CBL-interacting protein kinase 10 OS=Oryza sativa subsp. japonica OX=39947 GN=CIPK10 PE=2 SV=1	CBL-interacting protein kinase 10-like [Aegilops tauschii subsp. tauschii]	biological process: response to stimulus (GO:0050896);; molecular function: catalytic activity (GO:0003824);; biological process: metabolic process (GO:0008152);; biological process: cellular process (GO:0009987);; molecular function: binding (GO:0005488);; cellular component: cell (GO:0005623);; cellular component: cell part (GO:0044464);; biological process: signaling (GO:0023052);; biological …	MAPK signaling pathway - plant (ko04016);; Phosphatidylinositol signaling system (ko04070);; Plant-pathogen interaction (ko04626)
	Unigene_322906	CIPK12	2.43908e-06	5.99985	up	2.20891e-05	5.23329	up	Protein kinase domain;; NAF domain;; Protein tyrosine and serine/threonine kinase	CBL-interacting protein kinase 12 OS=Oryza sativa subsp. japonica OX=39947 GN=CIPK12 PE=1 SV=1	--	molecular function: catalytic activity (GO:0003824);; biological process: metabolic process (GO:0008152);; biological process: cellular process (GO:0009987);; molecular function: binding (GO:0005488);; cellular component: cell (GO:0005623);; cellular component: cell part (GO:0044464);; biological process: signaling (GO:0023052);; biological process: single-organism process (GO:0044699);; biologic…	MAPK signaling pathway - plant (ko04016);; Phosphatidylinositol signaling system (ko04070);; Plant-pathogen interaction (ko04626)
	Unigene_513540	CIPK14	0.00695596	4.15542	up	--	--	--	Protein kinase domain;; Protein tyrosine and serine/threonine kinase	CBL-interacting protein kinase 14 OS=Oryza sativa subsp. japonica OX=39947 GN=CIPK14 PE=2 SV=1	CBL-interacting protein kinase 15-like [Aegilops tauschii subsp. tauschii]	molecular function: catalytic activity (GO:0003824);; biological process: metabolic process (GO:0008152);; biological process: cellular process (GO:0009987);; molecular function: binding (GO:0005488);; cellular component: cell (GO:0005623);; cellular component: cell part (GO:0044464);; biological process: signaling (GO:0023052);; biological process: single-organism process (GO:0044699);; biologic…	MAPK signaling pathway - plant (ko04016);; Phosphatidylinositol signaling system (ko04070);; Plant-pathogen interaction (ko04626)
	Unigene_071158	CIPK16	--	--	--	1.99268e-10	10.0282	up	Protein kinase domain;; Protein tyrosine and serine/threonine kinase;; NAF domain;; Kinase-like	CBL-interacting protein kinase 16 OS=Oryza sativa subsp. japonica OX=39947 GN=CIPK16 PE=2 SV=1	hypothetical protein CFC21_065996 [Triticum aestivum]	molecular function: catalytic activity (GO:0003824);; biological process: metabolic process (GO:0008152);; biological process: cellular process (GO:0009987);; molecular function: binding (GO:0005488);; cellular component: cell (GO:0005623);; cellular component: cell part (GO:0044464);; biological process: localization (GO:0051179);; biological process: response to stimulus (GO:0050896);; biologic…	MAPK signaling pathway - plant (ko04016);; Phosphatidylinositol signaling system (ko04070);; Plant-pathogen interaction (ko04626)
	Unigene_525385	CIPK17	0.432064	-1.10015	normal	2.661e-08	-3.79218	down	Protein kinase domain;; Protein tyrosine and serine/threonine kinase;; NAF domain	CBL-interacting protein kinase 17 OS=Oryza sativa subsp. japonica OX=39947 GN=CIPK17 PE=2 SV=1	CBL-interacting protein kinase 17 [Hordeum vulgare subsp. spontaneum]	biological process: response to stimulus (GO:0050896);; molecular function: catalytic activity (GO:0003824);; biological process: metabolic process (GO:0008152);; biological process: cellular process (GO:0009987);; molecular function: binding (GO:0005488);; cellular component: cell (GO:0005623);; cellular component: cell part (GO:0044464);; cellular component: organelle (GO:0043226);; cellular co…	--
	Unigene_069053	CIPK17	0.00838192	-3.31501	down	1.68978e-07	-4.00303	down	Protein kinase domain;; Protein tyrosine and serine/threonine kinase;; NAF domain;; Kinase associated domain 1	CBL-interacting protein kinase 17 OS=Oryza sativa subsp. japonica OX=39947 GN=CIPK17 PE=2 SV=1	hypothetical protein CFC21_000901 [Triticum aestivum]	biological process: response to stimulus (GO:0050896);; molecular function: catalytic activity (GO:0003824);; biological process: metabolic process (GO:0008152);; biological process: cellular process (GO:0009987);; molecular function: binding (GO:0005488);; cellular component: cell (GO:0005623);; cellular component: cell part (GO:0044464);; cellular component: organelle (GO:0043226);; cellular co…	Plant hormone signal transduction (ko04075)
	Unigene_074585	CIPK19	2.15463e-05	4.65239	up	0.000324039	3.8936	up	Flavin containing amine oxidoreductase;; Pyridine nucleotide-disulphide oxidoreductase;; NAD(P)-binding Rossmann-like domain;; Protein kinase domain;; Protein tyrosine and serine/threonine kinase	CBL-interacting protein kinase 19 OS=Oryza sativa subsp. japonica OX=39947 GN=CIPK19 PE=1 SV=1	uncharacterized protein LOC4336652 [Oryza sativa Japonica Group]	molecular function: catalytic activity (GO:0003824);; biological process: metabolic process (GO:0008152);; biological process: cellular process (GO:0009987);; molecular function: binding (GO:0005488);; biological process: single-organism process (GO:0044699)	--
	Unigene_605495	CIPK19	6.29164e-09	5.68944	up	8.46019e-05	4.86292	up	Protein kinase domain;; Protein tyrosine and serine/threonine kinase;; NAF domain;; Lipopolysaccharide kinase (Kdo/WaaP) family;; Kinase-like	CBL-interacting protein kinase 19 OS=Oryza sativa subsp. japonica OX=39947 GN=CIPK19 PE=1 SV=1	unnamed protein product [Triticum turgidum subsp. durum]	molecular function: catalytic activity (GO:0003824);; biological process: metabolic process (GO:0008152);; biological process: cellular process (GO:0009987);; molecular function: binding (GO:0005488);; cellular component: cell (GO:0005623);; cellular component: cell part (GO:0044464);; biological process: signaling (GO:0023052);; biological process: single-organism process (GO:0044699);; biologic…	--
	Unigene_020918	CIPK23	2.21044e-05	-4.75283	down	0.0359303	-2.96641	normal	Protein kinase domain;; Protein tyrosine and serine/threonine kinase;; NAF domain;; Kinase-like	CBL-interacting protein kinase 23 OS=Oryza sativa subsp. japonica OX=39947 GN=CIPK23 PE=2 SV=1	CBL-interacting protein kinase 23 [Hordeum vulgare subsp. spontaneum]	biological process: response to stimulus (GO:0050896);; molecular function: catalytic activity (GO:0003824);; biological process: metabolic process (GO:0008152);; biological process: cellular process (GO:0009987);; molecular function: binding (GO:0005488);; cellular component: cell (GO:0005623);; cellular component: cell part (GO:0044464);; cellular component: organelle (GO:0043226);; cellular co…	MAPK signaling pathway - plant (ko04016);; Phosphatidylinositol signaling system (ko04070);; Plant-pathogen interaction (ko04626)
	Unigene_322521	CIPK23	--	--	--	1.16427e-06	7.37047	up	Protein kinase domain;; Protein tyrosine and serine/threonine kinase;; NAF domain;; Kinase-like	CBL-interacting protein kinase 9 OS=Oryza sativa subsp. japonica OX=39947 GN=CIPK9 PE=2 SV=1	--	molecular function: catalytic activity (GO:0003824);; biological process: metabolic process (GO:0008152);; biological process: cellular process (GO:0009987);; molecular function: binding (GO:0005488);; cellular component: cell (GO:0005623);; cellular component: cell part (GO:0044464);; biological process: response to stimulus (GO:0050896);; biological process: signaling (GO:0023052);; biological …	MAPK signaling pathway - plant (ko04016);; Phosphatidylinositol signaling system (ko04070);; Plant-pathogen interaction (ko04626)
	Unigene_578156	CIPK23	9.10629e-05	-4.46164	down	0.11096	-2.46638	normal	Protein kinase domain;; Protein tyrosine and serine/threonine kinase;; NAF domain;; Kinase-like	CBL-interacting protein kinase 23 OS=Oryza sativa subsp. japonica OX=39947 GN=CIPK23 PE=2 SV=1	CBL-interacting protein kinase 23 [Hordeum vulgare subsp. spontaneum]	biological process: response to stimulus (GO:0050896);; molecular function: catalytic activity (GO:0003824);; biological process: metabolic process (GO:0008152);; biological process: cellular process (GO:0009987);; molecular function: binding (GO:0005488);; cellular component: cell (GO:0005623);; cellular component: cell part (GO:0044464);; cellular component: organelle (GO:0043226);; cellular co…	--
	Unigene_198397	CIPK25	0.00255559	2.8994	up	0.0590892	1.34823	normal	Protein kinase domain;; Protein tyrosine and serine/threonine kinase;; NAF domain;; Kinase-like	CBL-interacting protein kinase 25 OS=Oryza sativa subsp. japonica OX=39947 GN=CIPK25 PE=2 SV=1	hypothetical protein CFC21_103890 [Triticum aestivum]	molecular function: catalytic activity (GO:0003824);; biological process: metabolic process (GO:0008152);; biological process: cellular process (GO:0009987);; molecular function: binding (GO:0005488);; cellular component: cell (GO:0005623);; cellular component: cell part (GO:0044464);; biological process: signaling (GO:0023052);; biological process: single-organism process (GO:0044699);; biologic…	Plant hormone signal transduction (ko04075)
	Unigene_525281	CIPK25	2.99273e-05	6.25051	up	0.0121801	4.57739	normal	Protein kinase domain;; Protein tyrosine and serine/threonine kinase;; NAF domain;; Kinase-like;; Phosphotransferase enzyme family	CBL-interacting protein kinase 25 OS=Oryza sativa subsp. japonica OX=39947 GN=CIPK25 PE=2 SV=1	hypothetical protein CFC21_103890 [Triticum aestivum]	molecular function: catalytic activity (GO:0003824);; biological process: metabolic process (GO:0008152);; biological process: cellular process (GO:0009987);; molecular function: binding (GO:0005488);; cellular component: cell (GO:0005623);; cellular component: cell part (GO:0044464);; biological process: signaling (GO:0023052);; biological process: single-organism process (GO:0044699);; biologic…	--
	Unigene_153050	CIPK29	0.00678783	-3.68861	down	0.0240617	-3.43598	normal	--	CBL-interacting protein kinase 29 OS=Oryza sativa subsp. japonica OX=39947 GN=CIPK29 PE=2 SV=1	Os07g0678300, partial [Oryza sativa Japonica Group]	molecular function: catalytic activity (GO:0003824);; biological process: metabolic process (GO:0008152);; biological process: cellular process (GO:0009987);; cellular component: cell (GO:0005623);; cellular component: cell part (GO:0044464);; cellular component: organelle (GO:0043226);; cellular component: cell junction (GO:0030054);; biological process: signaling (GO:0023052);; biological proce…	--
	Unigene_325229	CIPK29	--	--	--	0.000103263	6.26023	up	Protein kinase domain;; Protein tyrosine and serine/threonine kinase;; Kinase-like;; NAF domain	CBL-interacting protein kinase 29 OS=Oryza sativa subsp. japonica OX=39947 GN=CIPK29 PE=2 SV=1	CBL-interacting protein kinase 29-like [Aegilops tauschii subsp. tauschii]	molecular function: catalytic activity (GO:0003824);; biological process: metabolic process (GO:0008152);; biological process: cellular process (GO:0009987);; molecular function: binding (GO:0005488);; cellular component: cell (GO:0005623);; cellular component: cell part (GO:0044464);; cellular component: organelle (GO:0043226);; cellular component: cell junction (GO:0030054);; biological process…	Plant hormone signal transduction (ko04075)
	Unigene_527539	CIPK29	0.000358139	-3.86374	down	0.000176719	-4.16228	down	Protein kinase domain;; Protein tyrosine and serine/threonine kinase;; Kinase-like;; NAF domain	CBL-interacting protein kinase 29 OS=Oryza sativa subsp. japonica OX=39947 GN=CIPK29 PE=2 SV=1	CBL-interacting protein kinase 29-like [Aegilops tauschii subsp. tauschii]	molecular function: catalytic activity (GO:0003824);; biological process: metabolic process (GO:0008152);; biological process: cellular process (GO:0009987);; molecular function: binding (GO:0005488);; cellular component: cell (GO:0005623);; cellular component: cell part (GO:0044464);; cellular component: organelle (GO:0043226);; cellular component: cell junction (GO:0030054);; biological process…	--
	Unigene_072172	CIPK31	--	--	--	5.54735e-11	10.3762	up	Protein kinase domain;; Protein tyrosine and serine/threonine kinase;; NAF domain;; Kinase-like;; Lipopolysaccharide kinase (Kdo/WaaP) family	CBL-interacting protein kinase 31 OS=Oryza sativa subsp. japonica OX=39947 GN=CIPK31 PE=1 SV=1	CBL-interacting protein kinase 31 [Hordeum vulgare subsp. spontaneum]	molecular function: catalytic activity (GO:0003824);; biological process: metabolic process (GO:0008152);; biological process: cellular process (GO:0009987);; molecular function: binding (GO:0005488);; cellular component: cell (GO:0005623);; cellular component: cell part (GO:0044464);; cellular component: organelle (GO:0043226);; biological process: signaling (GO:0023052);; biological process: si…	--
	Unigene_195905	CIPK31	--	--	--	7.00882e-11	8.33149	up	Protein kinase domain;; Protein tyrosine and serine/threonine kinase;; NAF domain;; Kinase-like;; Lipopolysaccharide kinase (Kdo/WaaP) family;; Serine hydrolase (FSH1)	CBL-interacting protein kinase 31 OS=Oryza sativa subsp. japonica OX=39947 GN=CIPK31 PE=1 SV=1	CBL-interacting protein kinase 31 [Brachypodium distachyon]	molecular function: catalytic activity (GO:0003824);; biological process: metabolic process (GO:0008152);; biological process: cellular process (GO:0009987);; molecular function: binding (GO:0005488);; cellular component: cell (GO:0005623);; cellular component: cell part (GO:0044464);; cellular component: organelle (GO:0043226);; biological process: signaling (GO:0023052);; biological process: si…	Plant hormone signal transduction (ko04075)
	Unigene_319073	CIPK31	--	--	--	1.51872e-06	6.71082	up	Protein kinase domain;; Protein tyrosine and serine/threonine kinase;; NAF domain;; Lipopolysaccharide kinase (Kdo/WaaP) family;; Serine hydrolase (FSH1);; Serine hydrolase (FSH1)	CBL-interacting protein kinase 31 OS=Oryza sativa subsp. japonica OX=39947 GN=CIPK31 PE=1 SV=1	CBL-interacting protein kinase 31 [Brachypodium distachyon]	molecular function: catalytic activity (GO:0003824);; biological process: metabolic process (GO:0008152);; biological process: cellular process (GO:0009987);; molecular function: binding (GO:0005488);; cellular component: cell (GO:0005623);; cellular component: cell part (GO:0044464);; cellular component: organelle (GO:0043226);; biological process: signaling (GO:0023052);; biological process: si…	--
	Unigene_323038	CIPK31	--	--	--	1.06665e-09	10.6097	up	Protein kinase domain;; Protein tyrosine and serine/threonine kinase;; NAF domain;; Kinase-like;; Lipopolysaccharide kinase (Kdo/WaaP) family	CBL-interacting protein kinase 31 OS=Oryza sativa subsp. japonica OX=39947 GN=CIPK31 PE=1 SV=1	--	molecular function: catalytic activity (GO:0003824);; biological process: metabolic process (GO:0008152);; biological process: cellular process (GO:0009987);; molecular function: binding (GO:0005488);; cellular component: cell (GO:0005623);; cellular component: cell part (GO:0044464);; cellular component: organelle (GO:0043226);; biological process: signaling (GO:0023052);; biological process: si…	--
	Unigene_529471	CIPK31	0.0095796	2.65442	up	0.0521792	1.80516	normal	Protein kinase domain;; Protein tyrosine and serine/threonine kinase;; Kinase-like;; Lipopolysaccharide kinase (Kdo/WaaP) family	CBL-interacting protein kinase 31 OS=Oryza sativa subsp. japonica OX=39947 GN=CIPK31 PE=1 SV=1	unnamed protein product [Triticum turgidum subsp. durum]	molecular function: catalytic activity (GO:0003824);; biological process: metabolic process (GO:0008152);; biological process: cellular process (GO:0009987);; molecular function: binding (GO:0005488);; cellular component: cell (GO:0005623);; cellular component: cell part (GO:0044464);; cellular component: organelle (GO:0043226);; biological process: signaling (GO:0023052);; biological process: si…	--
Cyclic nucleotide-gated ion channel (CNGC)	Unigene_324245	CNGC17	2.40678e-06	5.94721	up	4.41016e-05	5.00328	up	Ion transport protein;; Cyclic nucleotide-binding domain	Cyclic nucleotide-gated ion channel 17 OS=Arabidopsis thaliana OX=3702 GN=CNGC17 PE=1 SV=1	unnamed protein product [Triticum turgidum subsp. durum]	molecular function: transporter activity (GO:0005215);; biological process: localization (GO:0051179);; cellular component: membrane (GO:0016020)	Plant-pathogen interaction (ko04626)
	Unigene_507685	CNGC17	0.0190027	-2.8678	normal	0.00253333	-3.28045	down	Cyclic nucleotide-binding domain	Cyclic nucleotide-gated ion channel 17 OS=Arabidopsis thaliana OX=3702 GN=CNGC17 PE=1 SV=1	cyclic nucleotide-gated ion channel 17 [Brachypodium distachyon]	--	Plant-pathogen interaction (ko04626)
	Unigene_058417	CNGC20	0.00908672	-3.11329	down	0.0530611	-2.62995	normal	Ion transport protein	Probable cyclic nucleotide-gated ion channel 20, chloroplastic OS=Arabidopsis thaliana OX=3702 GN=CNGC20 PE=2 SV=1	probable cyclic nucleotide-gated ion channel 20, chloroplastic [Brachypodium distachyon]	molecular function: transporter activity (GO:0005215);; biological process: localization (GO:0051179);; cellular component: membrane (GO:0016020)	Plant-pathogen interaction (ko04626)
Glutamate receptor(GLR)	Unigene_062540	GLR3.1	0.000191503	3.57426	up	0.0144979	2.66232	normal	Receptor family ligand binding region;; Ligand-gated ion channel;; Bacterial extracellular solute-binding proteins, family 3;; Periplasmic binding protein;; Ligated ion channel L-glutamate- and glycine-binding site	Glutamate receptor 3.1 OS=Oryza sativa subsp. japonica OX=39947 GN=GLR3.1 PE=1 SV=1	glutamate receptor 3.1 [Brachypodium distachyon]	molecular function: signal transducer activity (GO:0004871);; molecular function: transporter activity (GO:0005215);; molecular function: molecular transducer activity (GO:0060089);; biological process: cellular process (GO:0009987);; biological process: signaling (GO:0023052);; biological process: single-organism process (GO:0044699);; biological process: response to stimulus (GO:0050896);; biol…	--
	Unigene_062541	GLR3.1	0.000246506	3.65176	up	0.0142057	2.56593	normal	Ligand-gated ion channel;; Receptor family ligand binding region;; Bacterial extracellular solute-binding proteins, family 3;; Ligated ion channel L-glutamate- and glycine-binding site;; Uncharacterised conserved protein (DUF2371);; Receptor family ligand binding region;; Periplasmic binding protein	Glutamate receptor 3.1 OS=Oryza sativa subsp. japonica OX=39947 GN=GLR3.1 PE=1 SV=1	Glutamate receptor 3.1 [Hordeum vulgare]	molecular function: signal transducer activity (GO:0004871);; molecular function: transporter activity (GO:0005215);; molecular function: molecular transducer activity (GO:0060089);; biological process: cellular process (GO:0009987);; biological process: signaling (GO:0023052);; biological process: single-organism process (GO:0044699);; biological process: response to stimulus (GO:0050896);; biol…	MAPK signaling pathway - plant (ko04016);; Phosphatidylinositol signaling system (ko04070);; Plant-pathogen interaction (ko04626)
	Unigene_196961	GLR3.1	--	--	--	0.000298754	5.08525	up	Receptor family ligand binding region;; Periplasmic binding protein;; Bacterial extracellular solute-binding proteins, family 3;; Ligated ion channel L-glutamate- and glycine-binding site;; Ligand-gated ion channel;; Bacterial extracellular solute-binding proteins, family 3	Glutamate receptor 3.1 OS=Oryza sativa subsp. japonica OX=39947 GN=GLR3.1 PE=1 SV=1	hypothetical protein [Triticum aestivum]	molecular function: signal transducer activity (GO:0004871);; molecular function: transporter activity (GO:0005215);; molecular function: molecular transducer activity (GO:0060089);; biological process: cellular process (GO:0009987);; biological process: signaling (GO:0023052);; biological process: single-organism process (GO:0044699);; biological process: response to stimulus (GO:0050896);; biol…	MAPK signaling pathway - plant (ko04016);; Phosphatidylinositol signaling system (ko04070);; Plant-pathogen interaction (ko04626)
	Unigene_073707	GLR3.3	7.30467e-09	8.97933	up	6.08849e-07	7.55765	up	Ligand-gated ion channel;; Bacterial extracellular solute-binding proteins, family 3	Glutamate receptor 3.3 OS=Arabidopsis thaliana OX=3702 GN=GLR3.3 PE=1 SV=1	glutamate receptor 3.4-like [Aegilops tauschii subsp. tauschii]	molecular function: signal transducer activity (GO:0004871);; molecular function: transporter activity (GO:0005215);; molecular function: molecular transducer activity (GO:0060089);; biological process: cellular process (GO:0009987);; biological process: signaling (GO:0023052);; biological process: single-organism process (GO:0044699);; biological process: response to stimulus (GO:0050896);; biol…	MAPK signaling pathway - plant (ko04016);; Phosphatidylinositol signaling system (ko04070);; Plant-pathogen interaction (ko04626)
	Unigene_323956	GLR3.4	--	--	--	5.79858e-08	8.15751	up	Receptor family ligand binding region;; Periplasmic binding protein;; Ligand-gated ion channel;; Bacterial extracellular solute-binding proteins, family 3	Glutamate receptor 3.4 OS=Arabidopsis thaliana OX=3702 GN=GLR3.4 PE=2 SV=2	glutamate receptor 3.4 isoform X1 [Brachypodium distachyon]	molecular function: signal transducer activity (GO:0004871);; molecular function: transporter activity (GO:0005215);; molecular function: molecular transducer activity (GO:0060089);; biological process: cellular process (GO:0009987);; biological process: signaling (GO:0023052);; biological process: single-organism process (GO:0044699);; biological process: response to stimulus (GO:0050896);; biol…	--
Annexin (ANN)	Unigene_175969	AnnGh1	--	--	--	7.7567e-08	9.56574	up	Annexin	Annexin Gh1 (Fragment) OS=Gossypium hirsutum OX=3635 GN=AnnGh1 PE=1 SV=2	annexin D1 [Brachypodium distachyon]	biological process: response to stimulus (GO:0050896);; molecular function: binding (GO:0005488);; cellular component: extracellular region (GO:0005576);; cellular component: cell (GO:0005623);; cellular component: cell part (GO:0044464);; cellular component: organelle (GO:0043226);; biological process: localization (GO:0051179);; biological process: single-organism process (GO:0044699);; cellula…	--
	Unigene_066583	ANN4	--	--	--	0.00011327	6.56955	up	Annexin	Annexin D4 OS=Arabidopsis thaliana OX=3702 GN=ANN4 PE=1 SV=1	hypothetical protein CFC21_007244 [Triticum aestivum]	biological process: response to stimulus (GO:0050896);; molecular function: binding (GO:0005488);; cellular component: cell junction (GO:0030054);; cellular component: symplast (GO:0055044)	Plant hormone signal transduction (ko04075)
	Unigene_603884	ANN5	--	--	--	0.000136819	5.8906	up	Annexin	Annexin D5 OS=Arabidopsis thaliana OX=3702 GN=ANN5 PE=2 SV=2	unnamed protein product [Triticum turgidum subsp. durum]	biological process: reproduction (GO:0000003);; biological process: cellular process (GO:0009987);; biological process: developmental process (GO:0032502);; biological process: single-organism process (GO:0044699);; biological process: cellular component organization or biogenesis (GO:0071840);; biological process: response to stimulus (GO:0050896);; biological process: reproductive process (GO:0…	Plant hormone signal transduction (ko04075)
	Unigene_024480	ANN5	--	--	--	8.70368e-10	8.75531	up	Annexin	Annexin D5 OS=Arabidopsis thaliana OX=3702 GN=ANN5 PE=2 SV=2	hypothetical protein CFC21_065789 [Triticum aestivum]	biological process: reproduction (GO:0000003);; biological process: cellular process (GO:0009987);; biological process: developmental process (GO:0032502);; biological process: single-organism process (GO:0044699);; biological process: cellular component organization or biogenesis (GO:0071840);; biological process: response to stimulus (GO:0050896);; biological process: reproductive process (GO:0…	--
Calcium permeable stress-gated cation channel 1(CSC1)	Unigene_074829	CSC1	--	--	--	4.56075e-10	10.7415	up	Calcium-dependent channel, 7TM region, putative phosphate;; Late exocytosis, associated with Golgi transport;; Cytosolic domain of 10TM putative phosphate transporter	Calcium permeable stress-gated cation channel 1 OS=Arabidopsis thaliana OX=3702 GN=CSC1 PE=1 SV=1	hypothetical protein CFC21_000349 [Triticum aestivum]	molecular function: transporter activity (GO:0005215);; biological process: localization (GO:0051179);; cellular component: cell (GO:0005623);; cellular component: membrane (GO:0016020);; cellular component: cell part (GO:0044464);; biological process: response to stimulus (GO:0050896);; biological process: cellular process (GO:0009987);; biological process: biological regulation (GO:0065007);; b…	--
	Unigene_198958	CSC1	0.00795818	3.40759	up	0.0030176	2.79171	up	Calcium-dependent channel, 7TM region, putative phosphate;; Late exocytosis, associated with Golgi transport;; Cytosolic domain of 10TM putative phosphate transporter	Calcium permeable stress-gated cation channel 1 OS=Arabidopsis thaliana OX=3702 GN=CSC1 PE=1 SV=1	hypothetical protein CFC21_000349 [Triticum aestivum]	molecular function: transporter activity (GO:0005215);; biological process: localization (GO:0051179);; cellular component: cell (GO:0005623);; cellular component: membrane (GO:0016020);; cellular component: cell part (GO:0044464);; biological process: response to stimulus (GO:0050896);; biological process: cellular process (GO:0009987);; biological process: biological regulation (GO:0065007);; b…	--
	Unigene_526749	CSC1	8.91369e-05	5.12929	up	0.00769456	3.80903	up	Calcium-dependent channel, 7TM region, putative phosphate;; Cytosolic domain of 10TM putative phosphate transporter	Calcium permeable stress-gated cation channel 1 OS=Arabidopsis thaliana OX=3702 GN=CSC1 PE=1 SV=1	calcium permeable stress-gated cation channel 1 isoform X1 [Brachypodium distachyon]	molecular function: transporter activity (GO:0005215);; biological process: localization (GO:0051179);; cellular component: cell (GO:0005623);; cellular component: membrane (GO:0016020);; cellular component: cell part (GO:0044464);; biological process: response to stimulus (GO:0050896);; biological process: cellular process (GO:0009987);; biological process: biological regulation (GO:0065007);; b…	--

## Sheet: Leaves
Gene classification	ID	Gene name	L0_vs_L3_DESeq2_FDR	L0_vs_L3_DESeq2_log2FC	L0_vs_L3_regulated	L0_vs_L2_DESeq2_FDR	L0_vs_L6_DESeq2_log2FC	L0_vs_L6_regulated	Pfam_annotation	Swissprot_annotation	nr_annotation	GO_second_level_annotation	KEGG_pathway_annotation
Receptor-like kinase (RLK)	Unigene_005107	RLK5	0.902257	-0.147727	normal	0.000124504	1.36056	up	Protein kinase domain;; Protein tyrosine and serine/threonine kinase;; Leucine rich repeat;; Leucine Rich repeats (2 copies);; Leucine Rich Repeat;; Leucine rich repeat N-terminal domain;; Leucine Rich repeat	Receptor-like protein kinase 5 OS=Arabidopsis thaliana OX=3702 GN=RLK5 PE=1 SV=1	hypothetical protein CFC21_103831 [Triticum aestivum]	molecular function: catalytic activity (GO:0003824);; biological process: metabolic process (GO:0008152);; biological process: cellular process (GO:0009987);; molecular function: binding (GO:0005488)	--
	Unigene_527612	RLK7	0.960183	0.0808383	normal	0.00778426	-2.92152	down	Protein kinase domain;; Protein tyrosine and serine/threonine kinase;; Leucine rich repeat;; Leucine Rich repeats (2 copies);; Leucine Rich Repeat	Receptor-like protein kinase 7 OS=Arabidopsis thaliana OX=3702 GN=RLK7 PE=1 SV=1	predicted protein [Hordeum vulgare subsp. vulgare]	biological process: reproduction (GO:0000003);; molecular function: signal transducer activity (GO:0004871);; molecular function: molecular transducer activity (GO:0060089);; biological process: cellular process (GO:0009987);; biological process: signaling (GO:0023052);; biological process: single-organism process (GO:0044699);; biological process: response to stimulus (GO:0050896);; biological p…	--
	Unigene_526534	CRLK2	0.675922	0.592481	normal	0.00210141	-4.35037	down	Protein tyrosine and serine/threonine kinase;; Protein kinase domain;; Protein tyrosine and serine/threonine kinase;; Protein kinase domain	Calcium/calmodulin-regulated receptor-like kinase 2 OS=Arabidopsis thaliana OX=3702 GN=CRLK2 PE=2 SV=1	hypothetical protein CFC21_097152 [Triticum aestivum]	molecular function: catalytic activity (GO:0003824);; biological process: metabolic process (GO:0008152);; biological process: cellular process (GO:0009987);; molecular function: binding (GO:0005488)	Plant-pathogen interaction (ko04626)
	Unigene_074496	CRLK2	0.982828	0.027037	normal	0.00570118	1.13588	up	Protein tyrosine and serine/threonine kinase;; Protein kinase domain	Calcium/calmodulin-regulated receptor-like kinase 2 OS=Arabidopsis thaliana OX=3702 GN=CRLK2 PE=2 SV=1	hypothetical protein CFC21_097152 [Triticum aestivum]	molecular function: catalytic activity (GO:0003824);; biological process: metabolic process (GO:0008152);; biological process: cellular process (GO:0009987)	--
	Unigene_035919	RLK902	0.112568	-1.7789	normal	0.00094075	-3.55173	down	Protein tyrosine and serine/threonine kinase;; Protein kinase domain;; Protein tyrosine and serine/threonine kinase;; Protein kinase domain	Probable inactive receptor kinase RLK902 OS=Arabidopsis thaliana OX=3702 GN=RLK902 PE=1 SV=1	hypothetical protein CFC21_019556 [Triticum aestivum]	biological process: response to stimulus (GO:0050896);; molecular function: catalytic activity (GO:0003824);; biological process: metabolic process (GO:0008152);; biological process: cellular process (GO:0009987);; cellular component: cell (GO:0005623);; cellular component: cell part (GO:0044464);; cellular component: organelle (GO:0043226);; cellular component: membrane (GO:0016020);; cellular c…	--
	Unigene_073486	CAMRLK	0.00104159	-2.14569	down	9.91e-06	-2.90864	down	Protein tyrosine and serine/threonine kinase;; Leucine rich repeat;; Protein kinase domain;; Leucine Rich repeats (2 copies);; Leucine Rich Repeat	Calmodulin-binding receptor kinase CaMRLK OS=Arabidopsis thaliana OX=3702 GN=CAMRLK PE=1 SV=1	calmodulin-binding receptor kinase CaMRLK [Brachypodium distachyon]	biological process: reproduction (GO:0000003);; biological process: reproductive process (GO:0022414);; biological process: developmental process (GO:0032502);; molecular function: catalytic activity (GO:0003824);; biological process: metabolic process (GO:0008152);; biological process: cellular process (GO:0009987);; molecular function: binding (GO:0005488);; biological process: response to stim…	Plant hormone signal transduction (ko04075)
	Unigene_194672	CAMRLK	0.124709	-1.12889	normal	1.46e-06	-2.35358	down	Protein tyrosine and serine/threonine kinase;; Leucine rich repeat;; Protein kinase domain;; Leucine Rich repeats (2 copies);; Leucine Rich Repeat	Calmodulin-binding receptor kinase CaMRLK OS=Arabidopsis thaliana OX=3702 GN=CAMRLK PE=1 SV=1	calmodulin-binding receptor kinase CaMRLK [Brachypodium distachyon]	biological process: reproduction (GO:0000003);; biological process: reproductive process (GO:0022414);; biological process: developmental process (GO:0032502);; molecular function: catalytic activity (GO:0003824);; biological process: metabolic process (GO:0008152);; biological process: cellular process (GO:0009987);; molecular function: binding (GO:0005488);; biological process: response to stim…	Plant hormone signal transduction (ko04075)
	Unigene_322597	LRR-RLK	0.187804	0.99322	normal	2.03e-08	2.13499	up	Protein kinase domain;; Protein tyrosine and serine/threonine kinase	Probable leucine-rich repeat receptor-like serine/threonine-protein kinase At3g14840 OS=Arabidopsis thaliana OX=3702 GN=LRR-RLK PE=1 SV=1	--	molecular function: catalytic activity (GO:0003824);; biological process: metabolic process (GO:0008152);; biological process: cellular process (GO:0009987);; molecular function: binding (GO:0005488)	Plant-pathogen interaction (ko04626)
Calmodulin-like protein (CML)	Unigene_171088	CML8	0.0127852	1.85601	normal	4.81e-06	2.8188	up	EF hand;; EF-hand domain;; EF hand	Probable calcium-binding protein CML8 OS=Oryza sativa subsp. japonica OX=39947 GN=CML8 PE=2 SV=1	unnamed protein product [Triticum turgidum subsp. durum]	biological process: response to stimulus (GO:0050896);; molecular function: binding (GO:0005488);; cellular component: cell (GO:0005623);; cellular component: cell part (GO:0044464);; cellular component: membrane (GO:0016020);; biological process: cellular process (GO:0009987);; biological process: signaling (GO:0023052);; biological process: single-organism process (GO:0044699);; biological proc…	Plant-pathogen interaction (ko04626)
	Unigene_312810	CML8	0.0030477	1.91006	up	1.02e-05	2.3448	up	EF hand;; EF-hand domain;; EF hand;; EF hand;; EF-hand domain pair;; EF-hand domain;; EF hand;; EF-hand domain pair	Probable calcium-binding protein CML8 OS=Oryza sativa subsp. japonica OX=39947 GN=CML8 PE=2 SV=1	putative calcium-binding protein CML8 [Panicum miliaceum]	biological process: response to stimulus (GO:0050896);; molecular function: binding (GO:0005488);; cellular component: cell (GO:0005623);; cellular component: cell part (GO:0044464);; cellular component: membrane (GO:0016020);; biological process: cellular process (GO:0009987);; biological process: signaling (GO:0023052);; biological process: single-organism process (GO:0044699);; biological proc…	Plant-pathogen interaction (ko04626)
	Unigene_181817	CML9	0.152921	-1.22709	normal	2.53e-05	-2.44265	down	EF-hand domain pair;; EF hand;; EF-hand domain pair;; EF-hand domain;; EF-hand domain	Probable calcium-binding protein CML9 OS=Oryza sativa subsp. japonica OX=39947 GN=CML9 PE=2 SV=1	probable calcium-binding protein CML9 [Aegilops tauschii subsp. tauschii]	molecular function: binding (GO:0005488)	MAPK signaling pathway - plant (ko04016);; Phosphatidylinositol signaling system (ko04070);; Plant-pathogen interaction (ko04626)
	Unigene_003177	CML14	0.808731	-0.373358	normal	0.000148095	-4.69418	down	EF hand;; EF-hand domain pair;; EF-hand domain;; EF hand;; EF-hand domain pair;; Cytoskeletal-regulatory complex EF hand	Probable calcium-binding protein CML14 OS=Oryza sativa subsp. japonica OX=39947 GN=CML14 PE=2 SV=1	putative calcium-binding protein CML14 [Panicum miliaceum]	molecular function: binding (GO:0005488)	Plant-pathogen interaction (ko04626)
	Unigene_186960	CML15	0.863215	-0.243543	normal	3.47e-11	-6.8908	down	EF hand;; EF-hand domain pair;; EF hand;; EF-hand domain;; EF-hand domain pair;; Secreted protein acidic and rich in cysteine Ca binding region;; Dockerin type I domain	Probable calcium-binding protein CML15 OS=Oryza sativa subsp. japonica OX=39947 GN=CML15 PE=2 SV=1	polcalcin Jun o 2 [Hordeum vulgare]	molecular function: binding (GO:0005488);; cellular component: cell (GO:0005623);; cellular component: cell part (GO:0044464);; cellular component: organelle (GO:0043226);; biological process: response to stimulus (GO:0050896);; biological process: multicellular organismal process (GO:0032501);; biological process: developmental process (GO:0032502);; biological process: single-organism process (…	Plant-pathogen interaction (ko04626)
	Unigene_521256	CML15	0.0015242	-2.75428	down	4.25e-07	-6.86589	down	EF hand;; EF-hand domain pair;; EF hand;; EF-hand domain;; EF-hand domain pair;; Secreted protein acidic and rich in cysteine Ca binding region;; Dockerin type I domain	Probable calcium-binding protein CML15 OS=Oryza sativa subsp. japonica OX=39947 GN=CML15 PE=2 SV=1	unknown [Zea mays]	molecular function: binding (GO:0005488);; cellular component: cell (GO:0005623);; cellular component: cell part (GO:0044464);; cellular component: organelle (GO:0043226);; biological process: response to stimulus (GO:0050896);; biological process: multicellular organismal process (GO:0032501);; biological process: developmental process (GO:0032502);; biological process: single-organism process (…	Plant-pathogen interaction (ko04626)
	Unigene_199398	CML16	0.535177	-0.838585	normal	2.9e-07	-5.60132	down	EF hand;; EF hand;; EF-hand domain pair;; EF-hand domain;; EF-hand domain pair;; Secreted protein acidic and rich in cysteine Ca binding region;; Dockerin type I domain	Probable calcium-binding protein CML16 OS=Oryza sativa subsp. japonica OX=39947 GN=CML16 PE=2 SV=1	predicted protein, partial [Hordeum vulgare subsp. vulgare]	molecular function: binding (GO:0005488);; cellular component: cell (GO:0005623);; cellular component: cell part (GO:0044464);; cellular component: organelle (GO:0043226);; cellular component: membrane (GO:0016020)	Plant-pathogen interaction (ko04626)
	Unigene_515274	CML16	0.0960526	-1.63299	normal	6.49e-06	-5.49009	down	EF hand;; EF-hand domain pair;; EF hand;; EF-hand domain;; EF-hand domain pair;; Dockerin type I domain;; Secreted protein acidic and rich in cysteine Ca binding region	Probable calcium-binding protein CML16 OS=Oryza sativa subsp. japonica OX=39947 GN=CML16 PE=2 SV=1	predicted protein, partial [Hordeum vulgare subsp. vulgare]	molecular function: binding (GO:0005488);; cellular component: cell (GO:0005623);; cellular component: cell part (GO:0044464);; cellular component: organelle (GO:0043226);; cellular component: membrane (GO:0016020)	Plant-pathogen interaction (ko04626)
	Unigene_013228	CML21	0.22751	0.983123	normal	5.3e-06	2.22479	up	EF-hand domain pair;; EF hand;; EF-hand domain;; EF hand;; Secreted protein acidic and rich in cysteine Ca binding region;; EF-hand domain pair	Probable calcium-binding protein CML21 OS=Arabidopsis thaliana OX=3702 GN=CML21 PE=2 SV=1	probable calcium-binding protein CML21 [Aegilops tauschii subsp. tauschii]	molecular function: binding (GO:0005488)	Plant-pathogen interaction (ko04626)
	Unigene_030484	CML21	0.0167834	1.44089	normal	4.7e-15	2.54783	up	EF-hand domain pair;; EF hand;; EF-hand domain;; EF hand;; EF-hand domain;; EF-hand domain pair;; EF hand	Probable calcium-binding protein CML21 OS=Arabidopsis thaliana OX=3702 GN=CML21 PE=2 SV=1	probable calcium-binding protein CML21 [Brachypodium distachyon]	molecular function: binding (GO:0005488)	Plant-pathogen interaction (ko04626)
	Unigene_523476	CML21	0.000995452	2.04399	up	1.48e-07	2.72384	up	EF-hand domain pair;; EF hand;; EF-hand domain;; EF hand;; Secreted protein acidic and rich in cysteine Ca binding region	Probable calcium-binding protein CML21 OS=Arabidopsis thaliana OX=3702 GN=CML21 PE=2 SV=1	probable calcium-binding protein CML21 [Brachypodium distachyon]	molecular function: binding (GO:0005488)	Plant-pathogen interaction (ko04626)
	Unigene_169943	CML22	0.0212107	2.12342	normal	0.0087025	1.94719	up	EF hand;; EF-hand domain pair;; EF hand;; EF-hand domain;; EF-hand domain pair;; Cytoskeletal-regulatory complex EF hand	Probable calcium-binding protein CML22 OS=Oryza sativa subsp. japonica OX=39947 GN=CML22 PE=3 SV=1	hypothetical protein CFC21_017847 [Triticum aestivum]	molecular function: binding (GO:0005488);; cellular component: cell (GO:0005623);; cellular component: cell part (GO:0044464);; cellular component: organelle (GO:0043226);; biological process: response to stimulus (GO:0050896);; cellular component: membrane (GO:0016020);; cellular component: organelle part (GO:0044422);; cellular component: membrane part (GO:0044425)	Plant-pathogen interaction (ko04626)
	Unigene_307738	CML22	0.000509629	3.02448	up	0.0266284	2.04879	normal	EF hand;; EF-hand domain pair;; EF hand;; EF-hand domain;; EF-hand domain pair;; Cytoskeletal-regulatory complex EF hand	Probable calcium-binding protein CML22 OS=Oryza sativa subsp. japonica OX=39947 GN=CML22 PE=3 SV=1	hypothetical protein CFC21_017847 [Triticum aestivum]	molecular function: binding (GO:0005488);; cellular component: cell (GO:0005623);; cellular component: cell part (GO:0044464);; cellular component: organelle (GO:0043226);; biological process: response to stimulus (GO:0050896);; cellular component: membrane (GO:0016020);; cellular component: organelle part (GO:0044422);; cellular component: membrane part (GO:0044425)	Plant-pathogen interaction (ko04626)
	Unigene_069300	CML25	0.00919322	-2.26658	down	0.00568387	-2.36494	down	EF hand;; EF-hand domain;; EF-hand domain pair;; EF hand;; EF-hand domain pair	Probable calcium-binding protein CML25 OS=Arabidopsis thaliana OX=3702 GN=CML25 PE=2 SV=1	hypothetical protein CFC21_038185 [Triticum aestivum]	molecular function: binding (GO:0005488);; cellular component: cell (GO:0005623);; cellular component: membrane (GO:0016020);; cellular component: cell part (GO:0044464);; biological process: response to stimulus (GO:0050896);; biological process: multi-organism process (GO:0051704)	Plant-pathogen interaction (ko04626)
	Unigene_320381	CML25	0.0714917	-1.66122	normal	2.93e-15	-8.48826	down	EF hand;; EF-hand domain;; EF-hand domain pair;; EF hand;; EF-hand domain pair	Probable calcium-binding protein CML25 OS=Arabidopsis thaliana OX=3702 GN=CML25 PE=2 SV=1	probable calcium-binding protein CML35 [Aegilops tauschii subsp. tauschii]	molecular function: binding (GO:0005488);; cellular component: cell (GO:0005623);; cellular component: membrane (GO:0016020);; cellular component: cell part (GO:0044464);; biological process: response to stimulus (GO:0050896);; biological process: multi-organism process (GO:0051704)	Plant-pathogen interaction (ko04626)
	Unigene_588216	CML27	0.719533	0.512933	normal	1.3e-05	-6.22854	down	EF hand;; EF-hand domain;; EF-hand domain pair;; EF hand;; EF-hand domain pair;; Cytoskeletal-regulatory complex EF hand	Probable calcium-binding protein CML27 OS=Oryza sativa subsp. japonica OX=39947 GN=CML27 PE=2 SV=1	hypothetical protein CFC21_052114 [Triticum aestivum]	biological process: cellular process (GO:0009987);; biological process: developmental process (GO:0032502);; biological process: single-organism process (GO:0044699);; biological process: cellular component organization or biogenesis (GO:0071840);; molecular function: binding (GO:0005488);; biological process: response to stimulus (GO:0050896)	Plant-pathogen interaction (ko04626)
	Unigene_601917	CML29	3.54e-05	-2.61868	down	4.59e-06	-2.30139	down	EF hand;; EF hand;; EF-hand domain pair;; EF-hand domain pair;; EF-hand domain;; Secreted protein acidic and rich in cysteine Ca binding region	Probable calcium-binding protein CML29 OS=Oryza sativa subsp. japonica OX=39947 GN=CML29 PE=2 SV=1	unnamed protein product [Triticum turgidum subsp. durum]	molecular function: binding (GO:0005488)	MAPK signaling pathway - plant (ko04016);; Phosphatidylinositol signaling system (ko04070);; Plant-pathogen interaction (ko04626)
	Unigene_176018	CML31	4.24e-05	-3.60268	down	0.00103379	-3.03426	down	EF-hand domain pair;; EF hand;; EF-hand domain pair;; EF-hand domain;; EF hand	Probable calcium-binding protein CML31 OS=Oryza sativa subsp. japonica OX=39947 GN=CML31 PE=2 SV=1	probable calcium-binding protein CML31 [Brachypodium distachyon]	biological process: response to stimulus (GO:0050896);; molecular function: binding (GO:0005488);; cellular component: cell (GO:0005623);; cellular component: cell part (GO:0044464);; cellular component: organelle (GO:0043226);; cellular component: membrane (GO:0016020)	Plant-pathogen interaction (ko04626)
	Unigene_168743	CML36	4.13e-06	-5.49482	down	0.0244706	-2.83581	normal	EF hand;; EF hand;; EF-hand domain;; EF-hand domain pair;; EF-hand domain pair	Probable calcium-binding protein CML36 OS=Arabidopsis thaliana OX=3702 GN=CML36 PE=2 SV=1	unnamed protein product [Triticum turgidum subsp. durum]	molecular function: binding (GO:0005488);; cellular component: cell (GO:0005623);; cellular component: membrane (GO:0016020);; cellular component: cell part (GO:0044464);; biological process: response to stimulus (GO:0050896);; biological process: multi-organism process (GO:0051704)	Plant-pathogen interaction (ko04626)
	Unigene_021550	CML45	0.0271512	-1.99909	normal	3.3e-10	-5.97931	down	EF hand;; EF hand;; EF-hand domain;; EF-hand domain pair;; EF-hand domain pair	Probable calcium-binding protein CML45 OS=Arabidopsis thaliana OX=3702 GN=CML45 PE=2 SV=1	hypothetical protein CFC21_066031 [Triticum aestivum]	molecular function: binding (GO:0005488);; cellular component: cell (GO:0005623);; cellular component: cell part (GO:0044464);; cellular component: organelle (GO:0043226)	MAPK signaling pathway - plant (ko04016);; Phosphatidylinositol signaling system (ko04070);; Plant-pathogen interaction (ko04626)
	Unigene_174909	CML45	8.73e-05	-4.49778	down	0.0389585	-3.36972	normal	EF hand;; EF hand;; EF-hand domain;; EF-hand domain pair;; EF-hand domain pair	Probable calcium-binding protein CML45 OS=Arabidopsis thaliana OX=3702 GN=CML45 PE=2 SV=1	hypothetical protein CFC21_066031 [Triticum aestivum]	molecular function: binding (GO:0005488);; cellular component: cell (GO:0005623);; cellular component: cell part (GO:0044464);; cellular component: organelle (GO:0043226)	MAPK signaling pathway - plant (ko04016);; Phosphatidylinositol signaling system (ko04070);; Plant-pathogen interaction (ko04626)
Ca2+-dependent protein kinase (CPK/CDPK)	Unigene_051151	CPK1	0.857673	-0.17771	normal	0.000879282	-1.18394	down	Protein kinase domain;; EF hand;; EF-hand domain pair;; Protein tyrosine and serine/threonine kinase;; EF-hand domain;; EF hand;; EF-hand domain pair;; Cytoskeletal-regulatory complex EF hand;; Secreted protein acidic and rich in cysteine Ca binding region;; Kinase-like	Calcium-dependent protein kinase 1 OS=Oryza sativa subsp. japonica OX=39947 GN=CPK1 PE=2 SV=1	predicted protein [Hordeum vulgare subsp. vulgare]	biological process: response to stimulus (GO:0050896);; molecular function: catalytic activity (GO:0003824);; biological process: metabolic process (GO:0008152);; biological process: cellular process (GO:0009987);; molecular function: binding (GO:0005488);; cellular component: cell (GO:0005623);; cellular component: cell part (GO:0044464);; cellular component: organelle (GO:0043226);; cellular co…	Plant-pathogen interaction (ko04626)
	Unigene_593828	CPK3	0.395142	0.746153	normal	3.44e-05	1.90587	up	Protein kinase domain;; EF hand;; EF-hand domain pair;; EF-hand domain pair;; EF-hand domain;; EF hand;; Secreted protein acidic and rich in cysteine Ca binding region;; Protein tyrosine and serine/threonine kinase;; Cytoskeletal-regulatory complex EF hand	Calcium-dependent protein kinase 3 OS=Oryza sativa subsp. japonica OX=39947 GN=CPK3 PE=2 SV=1	calcium-dependent protein kinase 3 isoform X2 [Brachypodium distachyon]	biological process: response to stimulus (GO:0050896);; molecular function: catalytic activity (GO:0003824);; biological process: metabolic process (GO:0008152);; biological process: cellular process (GO:0009987);; molecular function: binding (GO:0005488);; cellular component: cell (GO:0005623);; cellular component: cell part (GO:0044464);; cellular component: organelle (GO:0043226);; cellular co…	Plant-pathogen interaction (ko04626)
	Unigene_595638	CPK4	0.976947	0.0496059	normal	0.00212978	-4.62145	down	Protein kinase domain;; Protein tyrosine and serine/threonine kinase;; EF hand;; EF hand;; EF-hand domain pair;; EF-hand domain;; EF-hand domain pair;; Kinase-like;; Secreted protein acidic and rich in cysteine Ca binding region	Calcium-dependent protein kinase 4 OS=Oryza sativa subsp. japonica OX=39947 GN=CPK4 PE=2 SV=1	--	biological process: response to stimulus (GO:0050896);; biological process: biological regulation (GO:0065007);; molecular function: catalytic activity (GO:0003824);; biological process: metabolic process (GO:0008152);; biological process: cellular process (GO:0009987);; molecular function: binding (GO:0005488);; cellular component: cell (GO:0005623);; cellular component: cell part (GO:0044464);;…	Plant-pathogen interaction (ko04626)
	Unigene_069443	CPK10	0.0163716	1.71466	normal	3.07e-09	2.70466	up	Protein kinase domain;; EF hand;; EF-hand domain pair;; EF-hand domain;; EF hand;; EF-hand domain pair;; Protein tyrosine and serine/threonine kinase;; Cytoskeletal-regulatory complex EF hand;; Lipopolysaccharide kinase (Kdo/WaaP) family	Calcium-dependent protein kinase 10 OS=Oryza sativa subsp. japonica OX=39947 GN=CPK10 PE=2 SV=1	hypothetical protein CFC21_068067, partial [Triticum aestivum]	biological process: response to stimulus (GO:0050896);; molecular function: catalytic activity (GO:0003824);; biological process: metabolic process (GO:0008152);; biological process: cellular process (GO:0009987);; molecular function: binding (GO:0005488);; cellular component: cell (GO:0005623);; cellular component: cell part (GO:0044464);; cellular component: organelle (GO:0043226);; cellular co…	Plant-pathogen interaction (ko04626)
	Unigene_605464	CPK10	--	--	--	3.01e-06	3.99988	up	--	Calcium-dependent protein kinase 10 OS=Oryza sativa subsp. japonica OX=39947 GN=CPK10 PE=2 SV=1	calcium-dependent protein kinase 10-like isoform X1 [Aegilops tauschii subsp. tauschii]	biological process: response to stimulus (GO:0050896);; molecular function: catalytic activity (GO:0003824);; biological process: metabolic process (GO:0008152);; biological process: cellular process (GO:0009987);; molecular function: binding (GO:0005488);; cellular component: cell (GO:0005623);; cellular component: cell part (GO:0044464);; cellular component: organelle (GO:0043226);; cellular co…	--
	Unigene_314000	CPK13	0.686105	0.361563	normal	0.000371616	1.13622	up	Protein kinase domain;; EF hand;; Protein tyrosine and serine/threonine kinase	Calcium-dependent protein kinase 13 OS=Oryza sativa subsp. japonica OX=39947 GN=CPK13 PE=2 SV=1	unnamed protein product [Triticum turgidum subsp. durum]	biological process: response to stimulus (GO:0050896);; molecular function: catalytic activity (GO:0003824);; biological process: metabolic process (GO:0008152);; biological process: cellular process (GO:0009987);; molecular function: binding (GO:0005488);; cellular component: cell (GO:0005623);; cellular component: cell part (GO:0044464);; cellular component: organelle (GO:0043226);; biological …	Plant-pathogen interaction (ko04626)
	Unigene_444006	CPK15	0.0382874	-1.55088	normal	0.00796396	-1.96378	down	Protein kinase domain;; EF-hand domain pair;; EF hand;; EF-hand domain;; EF hand;; EF-hand domain pair;; Protein tyrosine and serine/threonine kinase;; Protein kinase domain	Calcium-dependent protein kinase 15 OS=Oryza sativa subsp. japonica OX=39947 GN=CPK15 PE=2 SV=1	hypothetical protein OsI_21169 [Oryza sativa Indica Group]	biological process: response to stimulus (GO:0050896);; molecular function: catalytic activity (GO:0003824);; biological process: metabolic process (GO:0008152);; biological process: cellular process (GO:0009987);; molecular function: binding (GO:0005488);; cellular component: cell (GO:0005623);; cellular component: cell part (GO:0044464);; cellular component: organelle (GO:0043226);; cellular co…	Plant-pathogen interaction (ko04626)
	Unigene_195357	CPK16	0.00127331	2.26867	up	0.502617	1.15481	normal	--	Calcium-dependent protein kinase 16 OS=Oryza sativa subsp. japonica OX=39947 GN=CPK16 PE=3 SV=1	unnamed protein product [Triticum turgidum subsp. durum]	biological process: cellular process (GO:0009987);; biological process: biological regulation (GO:0065007);; molecular function: binding (GO:0005488);; biological process: single-organism process (GO:0044699);; molecular function: catalytic activity (GO:0003824);; biological process: metabolic process (GO:0008152);; cellular component: cell (GO:0005623);; cellular component: cell part (GO:0044464…	Plant-pathogen interaction (ko04626)
	Unigene_066873	CPK18	0.00849134	-1.99092	down	0.0128271	-1.45913	normal	Protein kinase domain;; EF hand;; Protein tyrosine and serine/threonine kinase;; EF hand;; EF-hand domain;; EF-hand domain pair;; EF-hand domain pair;; Secreted protein acidic and rich in cysteine Ca binding region;; Kinase-like	Calcium-dependent protein kinase 18 OS=Oryza sativa subsp. japonica OX=39947 GN=CPK18 PE=1 SV=1	hypothetical protein CFC21_016752 [Triticum aestivum]	biological process: response to stimulus (GO:0050896);; biological process: biological regulation (GO:0065007);; molecular function: catalytic activity (GO:0003824);; biological process: metabolic process (GO:0008152);; biological process: cellular process (GO:0009987);; molecular function: binding (GO:0005488);; cellular component: cell (GO:0005623);; cellular component: cell part (GO:0044464);;…	Plant-pathogen interaction (ko04626)
	Unigene_000646	CPK20	0.867792	0.188895	normal	0.000556402	1.46823	up	Protein kinase domain;; EF hand;; EF-hand domain pair;; EF-hand domain;; EF-hand domain pair;; EF hand;; Cytoskeletal-regulatory complex EF hand;; Protein kinase domain;; Protein tyrosine and serine/threonine kinase;; Protein kinase domain	Calcium-dependent protein kinase 20 OS=Oryza sativa subsp. japonica OX=39947 GN=CPK20 PE=2 SV=2	calcium-dependent protein kinase 8 [Brachypodium distachyon]	biological process: response to stimulus (GO:0050896);; molecular function: catalytic activity (GO:0003824);; biological process: metabolic process (GO:0008152);; biological process: cellular process (GO:0009987);; molecular function: binding (GO:0005488);; cellular component: cell (GO:0005623);; cellular component: cell part (GO:0044464);; cellular component: organelle (GO:0043226);; cellular co…	Plant-pathogen interaction (ko04626)
	Unigene_013408	CPK20	0.00101345	-1.67835	down	2.13e-08	-1.79605	down	Protein kinase domain;; Protein tyrosine and serine/threonine kinase	Calcium-dependent protein kinase 20 OS=Oryza sativa subsp. japonica OX=39947 GN=CPK20 PE=2 SV=2	calcium-dependent calmodulin-independent protein kinase CDPK-like [Hordeum vulgare]	biological process: response to stimulus (GO:0050896);; molecular function: catalytic activity (GO:0003824);; biological process: metabolic process (GO:0008152);; biological process: cellular process (GO:0009987);; molecular function: binding (GO:0005488);; cellular component: cell (GO:0005623);; cellular component: cell part (GO:0044464);; cellular component: organelle (GO:0043226);; cellular co…	Plant-pathogen interaction (ko04626)
	Unigene_030882	CPK20	0.684653	0.403504	normal	0.000102151	-1.89295	down	Protein kinase domain;; Protein tyrosine and serine/threonine kinase;; EF hand;; EF-hand domain pair;; EF hand;; EF-hand domain pair;; EF-hand domain;; Kinase-like;; Secreted protein acidic and rich in cysteine Ca binding region;; Lipopolysaccharide kinase (Kdo/WaaP) family;; Cytoskeletal-regulatory complex EF hand	Calcium-dependent protein kinase 20 OS=Oryza sativa subsp. japonica OX=39947 GN=CPK20 PE=2 SV=2	calcium-dependent protein kinase 7-D [Hordeum vulgare]	biological process: response to stimulus (GO:0050896);; molecular function: catalytic activity (GO:0003824);; biological process: metabolic process (GO:0008152);; biological process: cellular process (GO:0009987);; molecular function: binding (GO:0005488);; cellular component: cell (GO:0005623);; cellular component: cell part (GO:0044464);; cellular component: organelle (GO:0043226);; cellular co…	Plant-pathogen interaction (ko04626)
	Unigene_601957	CPK21	0.0016755	2.96637	up	0.0165392	2.12043	normal	Protein kinase domain;; EF hand;; EF-hand domain pair;; EF-hand domain pair;; Protein tyrosine and serine/threonine kinase;; EF-hand domain;; EF hand;; Lipopolysaccharide kinase (Kdo/WaaP) family;; Phosphotransferase enzyme family;; Kinase-like;; Cytoskeletal-regulatory complex EF hand	Calcium-dependent protein kinase 21 OS=Oryza sativa subsp. japonica OX=39947 GN=CPK21 PE=2 SV=1	calcium-dependent protein kinase 21-like [Aegilops tauschii subsp. tauschii]	biological process: response to stimulus (GO:0050896);; biological process: biological regulation (GO:0065007);; molecular function: catalytic activity (GO:0003824);; biological process: metabolic process (GO:0008152);; biological process: cellular process (GO:0009987);; molecular function: binding (GO:0005488);; cellular component: cell (GO:0005623);; cellular component: cell part (GO:0044464);;…	Plant-pathogen interaction (ko04626)
Calmodulin-binding transcription activator (CAMTA)	Unigene_529397	CAMTA3	0.630917	0.590207	normal	0.000193555	-3.42927	down	CG-1 domain;; IQ calmodulin-binding motif;; Ankyrin repeats (3 copies);; IPT/TIG domain;; Ankyrin repeat	Calmodulin-binding transcription activator 3 OS=Arabidopsis thaliana OX=3702 GN=CAMTA3 PE=1 SV=1	Calmodulin-binding transcription activator 2 [Hordeum vulgare]	molecular function: nucleic acid binding transcription factor activity (GO:0001071);; biological process: biological regulation (GO:0065007);; biological process: metabolic process (GO:0008152);; biological process: cellular process (GO:0009987);; biological process: response to stimulus (GO:0050896);; molecular function: binding (GO:0005488);; cellular component: cell (GO:0005623);; cellular com…	--
	Unigene_074406	CAMTA4	0.421104	0.655304	normal	3.48e-05	1.80227	up	CG-1 domain;; Ankyrin repeats (many copies);; IQ calmodulin-binding motif;; IPT/TIG domain;; Ankyrin repeats (3 copies);; Ankyrin repeat	Calmodulin-binding transcription activator 4 OS=Arabidopsis thaliana OX=3702 GN=CAMTA4 PE=1 SV=1	Calmodulin-binding transcription activator 4 [Hordeum vulgare]	molecular function: nucleic acid binding transcription factor activity (GO:0001071);; biological process: biological regulation (GO:0065007);; biological process: metabolic process (GO:0008152);; biological process: cellular process (GO:0009987);; molecular function: binding (GO:0005488);; cellular component: cell (GO:0005623);; cellular component: cell part (GO:0044464);; cellular component: org…	--
	Unigene_196297	CAMTA4	0.7407	0.34463	normal	0.00960112	1.09061	up	Ankyrin repeats (many copies);; IQ calmodulin-binding motif;; IPT/TIG domain;; Ankyrin repeats (3 copies);; Ankyrin repeat;; CG-1 domain	Calmodulin-binding transcription activator 4 OS=Arabidopsis thaliana OX=3702 GN=CAMTA4 PE=1 SV=1	hypothetical protein CFC21_029925 [Triticum aestivum]	molecular function: nucleic acid binding transcription factor activity (GO:0001071);; biological process: biological regulation (GO:0065007);; biological process: metabolic process (GO:0008152);; biological process: cellular process (GO:0009987);; molecular function: binding (GO:0005488);; cellular component: cell (GO:0005623);; cellular component: cell part (GO:0044464);; cellular component: org…	--
	Unigene_321628	CAMTA4	0.741588	0.487779	normal	4.67e-05	2.87131	up	Ankyrin repeats (many copies);; IQ calmodulin-binding motif;; IPT/TIG domain;; Ankyrin repeats (3 copies);; Ankyrin repeat;; CG-1 domain	Calmodulin-binding transcription activator 4 OS=Arabidopsis thaliana OX=3702 GN=CAMTA4 PE=1 SV=1	hypothetical protein CFC21_029925 [Triticum aestivum]	molecular function: nucleic acid binding transcription factor activity (GO:0001071);; biological process: biological regulation (GO:0065007);; biological process: metabolic process (GO:0008152);; biological process: cellular process (GO:0009987);; molecular function: binding (GO:0005488);; cellular component: cell (GO:0005623);; cellular component: cell part (GO:0044464);; cellular component: org…	--
Calcineurin B-like protein (CBL)	Unigene_019484	CBL1	0.300552	-0.867083	normal	0.000124107	-2.31548	down	EF hand;; EF-hand domain;; EF-hand domain pair;; EF hand	Calcineurin B-like protein 1 OS=Oryza sativa subsp. japonica OX=39947 GN=CBL1 PE=2 SV=2	calcineurin B-like protein 1 [Brachypodium distachyon]	biological process: reproduction (GO:0000003);; biological process: cellular process (GO:0009987);; biological process: developmental process (GO:0032502);; biological process: single-organism process (GO:0044699);; biological process: cellular component organization or biogenesis (GO:0071840);; biological process: response to stimulus (GO:0050896);; biological process: reproductive process (GO:0…	--
	Unigene_317249	CBL2	0.40453	0.56229	normal	0.00296122	1.07963	up	EF hand;; EF-hand domain pair;; EF-hand domain;; EF hand;; EF-hand domain pair	Calcineurin B-like protein 2 OS=Oryza sativa subsp. japonica OX=39947 GN=CBL2 PE=2 SV=1	CBL2 [Stipa purpurea]	cellular component: cell (GO:0005623);; cellular component: organelle (GO:0043226);; cellular component: cell part (GO:0044464);; molecular function: binding (GO:0005488);; cellular component: membrane (GO:0016020);; cellular component: organelle part (GO:0044422);; cellular component: macromolecular complex (GO:0032991);; biological process: cellular process (GO:0009987);; biological process: si…	--
	Unigene_523879	CBL3	0.329756	-1.07663	normal	0.000858825	-2.37594	down	EF hand;; EF-hand domain pair;; EF-hand domain;; EF hand	Calcineurin B-like protein 3 OS=Oryza sativa subsp. japonica OX=39947 GN=CBL3 PE=1 SV=1	unnamed protein product [Digitaria exilis]	molecular function: binding (GO:0005488)	--
	Unigene_591064	CBL4	0.101295	2.1395	normal	0.000910584	3.11899	up	--	Calcineurin B-like protein 4 OS=Oryza sativa subsp. japonica OX=39947 GN=CBL4 PE=1 SV=1	unnamed protein product [Triticum turgidum subsp. durum]	molecular function: catalytic activity (GO:0003824);; biological process: metabolic process (GO:0008152);; biological process: cellular process (GO:0009987);; molecular function: binding (GO:0005488);; biological process: response to stimulus (GO:0050896);; cellular component: cell (GO:0005623);; cellular component: cell part (GO:0044464);; cellular component: macromolecular complex (GO:0032991);…	--
	Unigene_192390	CBL6	0.242901	1.22088	normal	0.00508683	1.6448	up	EF hand;; EF-hand domain pair;; EF hand	Calcineurin B-like protein 6 OS=Oryza sativa subsp. japonica OX=39947 GN=CBL6 PE=2 SV=1	calcineurin B-like protein 6 [Hordeum vulgare subsp. spontaneum]	molecular function: binding (GO:0005488)	--
	Unigene_317618	CBL10	0.0281934	1.31559	normal	1.7e-08	2.08747	up	EF hand;; EF-hand domain pair;; EF-hand domain;; EF hand	Calcineurin B-like protein 10 OS=Oryza sativa subsp. japonica OX=39947 GN=CBL10 PE=2 SV=1	calcineurin B-like protein 10 [Oryza sativa Japonica Group]	molecular function: binding (GO:0005488)	--
CBL-interaction protein kinase (CIPK)	Unigene_194530	CIPK1	0.0261803	-1.87224	normal	3.16e-10	-2.57517	down	Protein kinase domain;; Protein tyrosine and serine/threonine kinase;; NAF domain;; Kinase-like	CBL-interacting protein kinase 1 OS=Oryza sativa subsp. japonica OX=39947 GN=CIPK1 PE=2 SV=1	CBL-interacting protein kinase 1 isoform X1 [Brachypodium distachyon]	biological process: response to stimulus (GO:0050896);; molecular function: catalytic activity (GO:0003824);; biological process: metabolic process (GO:0008152);; biological process: cellular process (GO:0009987);; molecular function: binding (GO:0005488);; cellular component: cell (GO:0005623);; cellular component: cell part (GO:0044464);; cellular component: organelle (GO:0043226);; cellular co…	--
	Unigene_523055	CIPK1	0.149238	-1.5711	normal	3.88e-11	-7.10436	down	Protein kinase domain;; Protein tyrosine and serine/threonine kinase;; NAF domain;; Kinase-like;; Kinase associated domain 1	CBL-interacting protein kinase 1 OS=Oryza sativa subsp. japonica OX=39947 GN=CIPK1 PE=2 SV=1	CBL-interacting protein kinase 1 isoform X1 [Brachypodium distachyon]	biological process: response to stimulus (GO:0050896);; molecular function: catalytic activity (GO:0003824);; biological process: metabolic process (GO:0008152);; biological process: cellular process (GO:0009987);; molecular function: binding (GO:0005488);; cellular component: cell (GO:0005623);; cellular component: cell part (GO:0044464);; cellular component: organelle (GO:0043226);; cellular co…	--
	Unigene_179547	CIPK2	3.79e-10	3.501	up	1.51e-13	4.14103	up	Protein kinase domain;; Protein tyrosine and serine/threonine kinase	CBL-interacting protein kinase 2 OS=Oryza sativa subsp. japonica OX=39947 GN=CIPK2 PE=2 SV=1	CBL-interacting protein kinase 2 [Hordeum vulgare subsp. spontaneum]	biological process: response to stimulus (GO:0050896);; molecular function: catalytic activity (GO:0003824);; biological process: metabolic process (GO:0008152);; biological process: cellular process (GO:0009987);; molecular function: binding (GO:0005488);; cellular component: cell (GO:0005623);; cellular component: cell part (GO:0044464);; biological process: signaling (GO:0023052);; biological …	--
	Unigene_315091	CIPK2	6.45e-12	3.64037	up	9.35e-25	4.46349	up	Protein kinase domain;; Protein tyrosine and serine/threonine kinase;; NAF domain;; Kinase-like	CBL-interacting protein kinase 2 OS=Oryza sativa subsp. japonica OX=39947 GN=CIPK2 PE=2 SV=1	CBL-interacting protein kinase 2 [Hordeum vulgare subsp. spontaneum]	biological process: response to stimulus (GO:0050896);; molecular function: catalytic activity (GO:0003824);; biological process: metabolic process (GO:0008152);; biological process: cellular process (GO:0009987);; molecular function: binding (GO:0005488);; cellular component: cell (GO:0005623);; cellular component: cell part (GO:0044464);; biological process: signaling (GO:0023052);; biological …	--
	Unigene_523712	CIPK2	1.49e-05	2.77126	up	6.37e-11	3.37754	up	Protein kinase domain;; Protein tyrosine and serine/threonine kinase;; Kinase-like;; NAF domain	CBL-interacting protein kinase 2 OS=Oryza sativa subsp. japonica OX=39947 GN=CIPK2 PE=2 SV=1	CBL-interacting protein kinase 2 [Hordeum vulgare subsp. spontaneum]	biological process: response to stimulus (GO:0050896);; molecular function: catalytic activity (GO:0003824);; biological process: metabolic process (GO:0008152);; biological process: cellular process (GO:0009987);; molecular function: binding (GO:0005488);; cellular component: cell (GO:0005623);; cellular component: cell part (GO:0044464);; biological process: signaling (GO:0023052);; biological …	--
	Unigene_593776	CIPK2	0.00545464	2.8257	up	0.273512	-1.98787	normal	Protein kinase domain;; Protein tyrosine and serine/threonine kinase;; Kinase-like;; NAF domain	CBL-interacting protein kinase 2 OS=Oryza sativa subsp. japonica OX=39947 GN=CIPK2 PE=2 SV=1	hypothetical protein CFC21_028092 [Triticum aestivum]	biological process: response to stimulus (GO:0050896);; molecular function: catalytic activity (GO:0003824);; biological process: metabolic process (GO:0008152);; biological process: cellular process (GO:0009987);; molecular function: binding (GO:0005488);; cellular component: cell (GO:0005623);; cellular component: cell part (GO:0044464);; biological process: signaling (GO:0023052);; biological …	--
	Unigene_321715	CIPK4	4.47e-10	4.03094	up	6.48e-13	4.43276	up	Protein kinase domain;; Protein tyrosine and serine/threonine kinase;; NAF domain;; Kinase-like	CBL-interacting protein kinase 4 OS=Oryza sativa subsp. japonica OX=39947 GN=CIPK4 PE=2 SV=2	hypothetical protein CFC21_064314 [Triticum aestivum]	molecular function: catalytic activity (GO:0003824);; biological process: metabolic process (GO:0008152);; biological process: cellular process (GO:0009987);; molecular function: binding (GO:0005488);; cellular component: cell (GO:0005623);; cellular component: cell part (GO:0044464);; cellular component: organelle (GO:0043226);; biological process: response to stimulus (GO:0050896);; biological …	--
	Unigene_605877	CIPK4	2.55e-06	3.26733	up	1.99e-11	3.25411	up	Protein kinase domain;; Protein tyrosine and serine/threonine kinase;; NAF domain;; Regulator of chromosome condensation (RCC1) repeat	CBL-interacting protein kinase 4 OS=Oryza sativa subsp. japonica OX=39947 GN=CIPK4 PE=2 SV=2	serine/threonine-protein kinase-like protein CCR4 [Aegilops tauschii subsp. tauschii]	molecular function: catalytic activity (GO:0003824);; biological process: metabolic process (GO:0008152);; biological process: cellular process (GO:0009987);; molecular function: binding (GO:0005488);; biological process: signaling (GO:0023052);; biological process: single-organism process (GO:0044699);; biological process: response to stimulus (GO:0050896);; biological process: biological regula…	--
	Unigene_324457	CIPK7	0.310863	1.14479	normal	0.000469911	2.43102	up	Protein kinase domain;; Protein tyrosine and serine/threonine kinase;; NAF domain	CBL-interacting protein kinase 7 OS=Oryza sativa subsp. japonica OX=39947 GN=CIPK7 PE=2 SV=1	hypothetical protein CFC21_079396 [Triticum aestivum]	molecular function: catalytic activity (GO:0003824);; biological process: metabolic process (GO:0008152);; biological process: cellular process (GO:0009987);; molecular function: binding (GO:0005488);; cellular component: cell (GO:0005623);; cellular component: cell part (GO:0044464);; cellular component: organelle (GO:0043226);; biological process: response to stimulus (GO:0050896);; biological …	--
	Unigene_004702	CIPK8	0.825992	-0.283704	normal	0.00108269	-4.1651	down	Protein kinase domain;; Protein tyrosine and serine/threonine kinase;; NAF domain;; Kinase-like	CBL-interacting protein kinase 8 OS=Oryza sativa subsp. japonica OX=39947 GN=CIPK8 PE=2 SV=1	hypothetical protein CFC21_047166 [Triticum aestivum]	molecular function: catalytic activity (GO:0003824);; biological process: metabolic process (GO:0008152);; biological process: cellular process (GO:0009987);; molecular function: binding (GO:0005488);; biological process: signaling (GO:0023052);; biological process: single-organism process (GO:0044699);; biological process: response to stimulus (GO:0050896);; biological process: biological regula…	--
	Unigene_073013	CIPK9	0.238227	0.851086	normal	1.02e-06	1.72815	up	NAF domain;; Protein kinase domain;; Protein kinase domain;; Protein tyrosine and serine/threonine kinase;; Kinase-like	CBL-interacting protein kinase 9 OS=Oryza sativa subsp. japonica OX=39947 GN=CIPK9 PE=2 SV=1	CBL-interacting protein kinase 9 [Triticum urartu]	molecular function: catalytic activity (GO:0003824);; biological process: metabolic process (GO:0008152);; biological process: cellular process (GO:0009987);; molecular function: binding (GO:0005488);; cellular component: cell (GO:0005623);; cellular component: cell part (GO:0044464);; biological process: response to stimulus (GO:0050896);; biological process: signaling (GO:0023052);; biological …	--
	Unigene_322521	CIPK9	0.145832	1.10667	normal	1.72e-05	2.11507	up	Protein kinase domain;; Protein tyrosine and serine/threonine kinase;; NAF domain;; Kinase-like	CBL-interacting protein kinase 9 OS=Oryza sativa subsp. japonica OX=39947 GN=CIPK9 PE=2 SV=1	--	molecular function: catalytic activity (GO:0003824);; biological process: metabolic process (GO:0008152);; biological process: cellular process (GO:0009987);; molecular function: binding (GO:0005488);; cellular component: cell (GO:0005623);; cellular component: cell part (GO:0044464);; biological process: response to stimulus (GO:0050896);; biological process: signaling (GO:0023052);; biological …	--
	Unigene_520262	CIPK9	0.248157	-1.3266	normal	1.99e-08	-5.89909	down	NAF domain;; Protein kinase domain;; Protein kinase domain;; Protein tyrosine and serine/threonine kinase;; Kinase-like	CBL-interacting protein kinase 9 OS=Oryza sativa subsp. japonica OX=39947 GN=CIPK9 PE=2 SV=1	CBL-interacting protein kinase 9 [Aegilops tauschii subsp. tauschii]	molecular function: catalytic activity (GO:0003824);; biological process: metabolic process (GO:0008152);; biological process: cellular process (GO:0009987);; molecular function: binding (GO:0005488);; cellular component: cell (GO:0005623);; cellular component: cell part (GO:0044464);; biological process: response to stimulus (GO:0050896);; biological process: signaling (GO:0023052);; biological …	--
	Unigene_001085	CIPK9	0.542104	-0.612589	normal	0.00679705	-1.36378	down	Protein kinase domain;; Protein tyrosine and serine/threonine kinase;; NAF domain;; Kinase-like	CBL-interacting protein kinase 9 OS=Oryza sativa subsp. japonica OX=39947 GN=CIPK9 PE=2 SV=1	CBL-interacting protein kinase 9 [Aegilops tauschii subsp. tauschii]	molecular function: catalytic activity (GO:0003824);; biological process: metabolic process (GO:0008152);; biological process: cellular process (GO:0009987);; molecular function: binding (GO:0005488);; cellular component: cell (GO:0005623);; cellular component: cell part (GO:0044464);; biological process: response to stimulus (GO:0050896);; biological process: signaling (GO:0023052);; biological …	--
	Unigene_071544	CIPK10	7.64e-07	2.68536	up	2.69e-13	2.92612	up	Protein kinase domain;; Protein tyrosine and serine/threonine kinase;; NAF domain;; Kinase-like	CBL-interacting protein kinase 10 OS=Oryza sativa subsp. japonica OX=39947 GN=CIPK10 PE=2 SV=1	CBL-interacting protein kinase 10-like [Aegilops tauschii subsp. tauschii]	biological process: response to stimulus (GO:0050896);; molecular function: catalytic activity (GO:0003824);; biological process: metabolic process (GO:0008152);; biological process: cellular process (GO:0009987);; molecular function: binding (GO:0005488);; cellular component: cell (GO:0005623);; cellular component: cell part (GO:0044464);; biological process: signaling (GO:0023052);; biological …	--
	Unigene_180166	CIPK10	0.000217074	2.71648	up	9.03e-09	3.01037	up	Protein kinase domain;; Protein tyrosine and serine/threonine kinase	CBL-interacting protein kinase 10 OS=Oryza sativa subsp. japonica OX=39947 GN=CIPK10 PE=2 SV=1	hypothetical protein CFC21_052160 [Triticum aestivum]	biological process: response to stimulus (GO:0050896);; molecular function: catalytic activity (GO:0003824);; biological process: metabolic process (GO:0008152);; biological process: cellular process (GO:0009987);; molecular function: binding (GO:0005488);; cellular component: cell (GO:0005623);; cellular component: cell part (GO:0044464);; biological process: signaling (GO:0023052);; biological …	--
	Unigene_194646	CIPK10	0.000146849	2.38764	up	0.00527234	1.29392	up	Protein kinase domain;; Protein tyrosine and serine/threonine kinase;; NAF domain	CBL-interacting protein kinase 10 OS=Oryza sativa subsp. japonica OX=39947 GN=CIPK10 PE=2 SV=1	CBL-interacting protein kinase 10-like [Aegilops tauschii subsp. tauschii]	biological process: response to stimulus (GO:0050896);; molecular function: catalytic activity (GO:0003824);; biological process: metabolic process (GO:0008152);; biological process: cellular process (GO:0009987);; molecular function: binding (GO:0005488);; cellular component: cell (GO:0005623);; cellular component: cell part (GO:0044464);; biological process: signaling (GO:0023052);; biological …	--
	Unigene_525475	CIPK10	3.25e-06	2.65016	up	4.69e-05	2.15421	up	Protein kinase domain;; Protein tyrosine and serine/threonine kinase;; NAF domain	CBL-interacting protein kinase 10 OS=Oryza sativa subsp. japonica OX=39947 GN=CIPK10 PE=2 SV=1	CBL-interacting protein kinase 10-like [Aegilops tauschii subsp. tauschii]	biological process: response to stimulus (GO:0050896);; molecular function: catalytic activity (GO:0003824);; biological process: metabolic process (GO:0008152);; biological process: cellular process (GO:0009987);; molecular function: binding (GO:0005488);; cellular component: cell (GO:0005623);; cellular component: cell part (GO:0044464);; biological process: signaling (GO:0023052);; biological …	--
	Unigene_018150	CIPK11	5.73e-05	2.04081	up	2.44e-12	2.92024	up	Protein kinase domain;; Protein tyrosine and serine/threonine kinase;; NAF domain;; Kinase-like	CBL-interacting protein kinase 11 OS=Oryza sativa subsp. japonica OX=39947 GN=CIPK11 PE=2 SV=1	hypothetical protein CFC21_036764 [Triticum aestivum]	molecular function: catalytic activity (GO:0003824);; biological process: metabolic process (GO:0008152);; biological process: cellular process (GO:0009987);; molecular function: binding (GO:0005488);; cellular component: cell (GO:0005623);; cellular component: cell part (GO:0044464);; biological process: signaling (GO:0023052);; biological process: single-organism process (GO:0044699);; biologic…	--
	Unigene_026363	CIPK11	0.117182	1.30347	normal	0.00400452	2.07604	up	Protein kinase domain;; Protein tyrosine and serine/threonine kinase;; NAF domain;; Kinase-like	CBL-interacting protein kinase 11 OS=Oryza sativa subsp. japonica OX=39947 GN=CIPK11 PE=2 SV=1	CBL-interacting protein kinase 28 [Brachypodium distachyon]	molecular function: catalytic activity (GO:0003824);; biological process: metabolic process (GO:0008152);; biological process: cellular process (GO:0009987);; molecular function: binding (GO:0005488);; cellular component: cell (GO:0005623);; cellular component: cell part (GO:0044464);; biological process: signaling (GO:0023052);; biological process: single-organism process (GO:0044699);; biologic…	--
	Unigene_322906	CIPK12	9.5e-06	2.91797	up	9.1e-16	3.86941	up	Protein kinase domain;; NAF domain;; Protein tyrosine and serine/threonine kinase	CBL-interacting protein kinase 12 OS=Oryza sativa subsp. japonica OX=39947 GN=CIPK12 PE=1 SV=1	--	molecular function: catalytic activity (GO:0003824);; biological process: metabolic process (GO:0008152);; biological process: cellular process (GO:0009987);; molecular function: binding (GO:0005488);; cellular component: cell (GO:0005623);; cellular component: cell part (GO:0044464);; biological process: signaling (GO:0023052);; biological process: single-organism process (GO:0044699);; biologic…	--
	Unigene_518736	CIPK12	0.000789355	2.34691	up	0.104126	1.06539	normal	Protein kinase domain;; NAF domain;; Protein tyrosine and serine/threonine kinase	CBL-interacting protein kinase 12 OS=Oryza sativa subsp. japonica OX=39947 GN=CIPK12 PE=1 SV=1	CBL-interacting protein kinase 19 [Hordeum vulgare]	molecular function: catalytic activity (GO:0003824);; biological process: metabolic process (GO:0008152);; biological process: cellular process (GO:0009987);; molecular function: binding (GO:0005488);; cellular component: cell (GO:0005623);; cellular component: cell part (GO:0044464);; biological process: signaling (GO:0023052);; biological process: single-organism process (GO:0044699);; biologic…	--
	Unigene_185187	CIPK16	0.000369001	3.2921	up	0.000224991	2.83162	up	Protein kinase domain;; Protein tyrosine and serine/threonine kinase	CBL-interacting protein kinase 16 OS=Oryza sativa subsp. japonica OX=39947 GN=CIPK16 PE=2 SV=1	--	molecular function: catalytic activity (GO:0003824);; biological process: metabolic process (GO:0008152);; biological process: cellular process (GO:0009987);; molecular function: binding (GO:0005488);; cellular component: cell (GO:0005623);; cellular component: cell part (GO:0044464);; biological process: localization (GO:0051179);; biological process: response to stimulus (GO:0050896);; biologic…	--
	Unigene_069053	CIPK17	2.93e-07	-3.55491	down	0.0164734	-3.42865	normal	Protein kinase domain;; Protein tyrosine and serine/threonine kinase;; NAF domain;; Kinase associated domain 1	CBL-interacting protein kinase 17 OS=Oryza sativa subsp. japonica OX=39947 GN=CIPK17 PE=2 SV=1	hypothetical protein CFC21_000901 [Triticum aestivum]	biological process: response to stimulus (GO:0050896);; molecular function: catalytic activity (GO:0003824);; biological process: metabolic process (GO:0008152);; biological process: cellular process (GO:0009987);; molecular function: binding (GO:0005488);; cellular component: cell (GO:0005623);; cellular component: cell part (GO:0044464);; cellular component: organelle (GO:0043226);; cellular co…	--
	Unigene_525385	CIPK17	0.000445059	-2.24515	down	2.98e-13	-3.92854	down	Protein kinase domain;; Protein tyrosine and serine/threonine kinase;; NAF domain	CBL-interacting protein kinase 17 OS=Oryza sativa subsp. japonica OX=39947 GN=CIPK17 PE=2 SV=1	CBL-interacting protein kinase 17 [Hordeum vulgare subsp. spontaneum]	biological process: response to stimulus (GO:0050896);; molecular function: catalytic activity (GO:0003824);; biological process: metabolic process (GO:0008152);; biological process: cellular process (GO:0009987);; molecular function: binding (GO:0005488);; cellular component: cell (GO:0005623);; cellular component: cell part (GO:0044464);; cellular component: organelle (GO:0043226);; cellular co…	--
	Unigene_072091	CIPK19	0.0320281	1.58769	normal	4.41e-05	1.9498	up	Protein kinase domain;; NAF domain;; Protein tyrosine and serine/threonine kinase	CBL-interacting protein kinase 19 OS=Oryza sativa subsp. japonica OX=39947 GN=CIPK19 PE=1 SV=1	hypothetical protein CFC21_003418 [Triticum aestivum]	molecular function: catalytic activity (GO:0003824);; biological process: metabolic process (GO:0008152);; biological process: cellular process (GO:0009987);; molecular function: binding (GO:0005488);; cellular component: cell (GO:0005623);; cellular component: cell part (GO:0044464);; biological process: signaling (GO:0023052);; biological process: single-organism process (GO:0044699);; biologic…	--
	Unigene_074585	CIPK19	0.0137959	1.75285	normal	3.29e-08	2.20798	up	Flavin containing amine oxidoreductase;; Pyridine nucleotide-disulphide oxidoreductase;; NAD(P)-binding Rossmann-like domain;; Protein kinase domain;; Protein tyrosine and serine/threonine kinase	CBL-interacting protein kinase 19 OS=Oryza sativa subsp. japonica OX=39947 GN=CIPK19 PE=1 SV=1	uncharacterized protein LOC4336652 [Oryza sativa Japonica Group]	molecular function: catalytic activity (GO:0003824);; biological process: metabolic process (GO:0008152);; biological process: cellular process (GO:0009987);; molecular function: binding (GO:0005488);; biological process: single-organism process (GO:0044699)	--
	Unigene_311828	CIPK19	0.0934344	1.8022	normal	1.7e-05	3.05957	up	NAF domain	CBL-interacting protein kinase 19 OS=Oryza sativa subsp. japonica OX=39947 GN=CIPK19 PE=1 SV=1	hypothetical protein CFC21_003418 [Triticum aestivum]	molecular function: catalytic activity (GO:0003824);; biological process: metabolic process (GO:0008152);; biological process: cellular process (GO:0009987);; cellular component: cell (GO:0005623);; cellular component: cell part (GO:0044464);; biological process: signaling (GO:0023052);; biological process: single-organism process (GO:0044699);; biological process: response to stimulus (GO:005089…	--
	Unigene_605495	CIPK19	4.04e-06	2.77919	up	1.83e-10	2.7158	up	Protein kinase domain;; Protein tyrosine and serine/threonine kinase;; NAF domain;; Lipopolysaccharide kinase (Kdo/WaaP) family;; Kinase-like	CBL-interacting protein kinase 19 OS=Oryza sativa subsp. japonica OX=39947 GN=CIPK19 PE=1 SV=1	unnamed protein product [Triticum turgidum subsp. durum]	molecular function: catalytic activity (GO:0003824);; biological process: metabolic process (GO:0008152);; biological process: cellular process (GO:0009987);; molecular function: binding (GO:0005488);; cellular component: cell (GO:0005623);; cellular component: cell part (GO:0044464);; biological process: signaling (GO:0023052);; biological process: single-organism process (GO:0044699);; biologic…	--
	Unigene_020918	CIPK23	0.656988	0.697278	normal	0.00202683	-4.81015	down	Protein kinase domain;; Protein tyrosine and serine/threonine kinase;; NAF domain;; Kinase-like	CBL-interacting protein kinase 23 OS=Oryza sativa subsp. japonica OX=39947 GN=CIPK23 PE=2 SV=1	CBL-interacting protein kinase 23 [Hordeum vulgare subsp. spontaneum]	biological process: response to stimulus (GO:0050896);; molecular function: catalytic activity (GO:0003824);; biological process: metabolic process (GO:0008152);; biological process: cellular process (GO:0009987);; molecular function: binding (GO:0005488);; cellular component: cell (GO:0005623);; cellular component: cell part (GO:0044464);; cellular component: organelle (GO:0043226);; cellular co…	--
	Unigene_072918	CIPK25	0.000615983	3.51193	up	4.08e-09	5.35758	up	--	CBL-interacting protein kinase 25 OS=Oryza sativa subsp. japonica OX=39947 GN=CIPK25 PE=2 SV=1	CBL-interacting protein kinase 25-like [Aegilops tauschii subsp. tauschii]	molecular function: catalytic activity (GO:0003824);; biological process: metabolic process (GO:0008152);; biological process: cellular process (GO:0009987);; cellular component: cell (GO:0005623);; cellular component: cell part (GO:0044464);; biological process: signaling (GO:0023052);; biological process: single-organism process (GO:0044699);; biological process: response to stimulus (GO:005089…	--
	Unigene_198397	CIPK25	1.87e-11	3.85415	up	1.13e-15	3.95742	up	Protein kinase domain;; Protein tyrosine and serine/threonine kinase;; NAF domain;; Kinase-like	CBL-interacting protein kinase 25 OS=Oryza sativa subsp. japonica OX=39947 GN=CIPK25 PE=2 SV=1	hypothetical protein CFC21_103890 [Triticum aestivum]	molecular function: catalytic activity (GO:0003824);; biological process: metabolic process (GO:0008152);; biological process: cellular process (GO:0009987);; molecular function: binding (GO:0005488);; cellular component: cell (GO:0005623);; cellular component: cell part (GO:0044464);; biological process: signaling (GO:0023052);; biological process: single-organism process (GO:0044699);; biologic…	--
	Unigene_525281	CIPK25	9.52e-16	4.27586	up	8.54e-41	5.44546	up	Protein kinase domain;; Protein tyrosine and serine/threonine kinase;; NAF domain;; Kinase-like;; Phosphotransferase enzyme family	CBL-interacting protein kinase 25 OS=Oryza sativa subsp. japonica OX=39947 GN=CIPK25 PE=2 SV=1	hypothetical protein CFC21_103890 [Triticum aestivum]	molecular function: catalytic activity (GO:0003824);; biological process: metabolic process (GO:0008152);; biological process: cellular process (GO:0009987);; molecular function: binding (GO:0005488);; cellular component: cell (GO:0005623);; cellular component: cell part (GO:0044464);; biological process: signaling (GO:0023052);; biological process: single-organism process (GO:0044699);; biologic…	--
	Unigene_320549	CIPK26	0.796865	0.245633	normal	0.000423419	1.09974	up	Protein kinase domain;; Protein tyrosine and serine/threonine kinase;; NAF domain;; Kinase-like	CBL-interacting protein kinase 26 OS=Oryza sativa subsp. japonica OX=39947 GN=CIPK26 PE=2 SV=1	unnamed protein product [Triticum turgidum subsp. durum]	molecular function: catalytic activity (GO:0003824);; biological process: metabolic process (GO:0008152);; biological process: cellular process (GO:0009987);; molecular function: binding (GO:0005488);; biological process: signaling (GO:0023052);; biological process: single-organism process (GO:0044699);; biological process: response to stimulus (GO:0050896);; biological process: biological regula…	--
	Unigene_153050	CIPK29	0.00572694	-3.10768	down	1.08e-05	-6.37046	down	--	CBL-interacting protein kinase 29 OS=Oryza sativa subsp. japonica OX=39947 GN=CIPK29 PE=2 SV=1	Os07g0678300, partial [Oryza sativa Japonica Group]	molecular function: catalytic activity (GO:0003824);; biological process: metabolic process (GO:0008152);; biological process: cellular process (GO:0009987);; cellular component: cell (GO:0005623);; cellular component: cell part (GO:0044464);; cellular component: organelle (GO:0043226);; cellular component: cell junction (GO:0030054);; biological process: signaling (GO:0023052);; biological proce…	--
	Unigene_325229	CIPK29	0.740891	-0.442417	normal	0.00561526	-1.67276	down	Protein kinase domain;; Protein tyrosine and serine/threonine kinase;; Kinase-like;; NAF domain	CBL-interacting protein kinase 29 OS=Oryza sativa subsp. japonica OX=39947 GN=CIPK29 PE=2 SV=1	CBL-interacting protein kinase 29-like [Aegilops tauschii subsp. tauschii]	molecular function: catalytic activity (GO:0003824);; biological process: metabolic process (GO:0008152);; biological process: cellular process (GO:0009987);; molecular function: binding (GO:0005488);; cellular component: cell (GO:0005623);; cellular component: cell part (GO:0044464);; cellular component: organelle (GO:0043226);; cellular component: cell junction (GO:0030054);; biological process…	--
	Unigene_527539	CIPK29	0.00168706	-2.87225	down	6.04e-08	-5.41665	down	Protein kinase domain;; Protein tyrosine and serine/threonine kinase;; Kinase-like;; NAF domain	CBL-interacting protein kinase 29 OS=Oryza sativa subsp. japonica OX=39947 GN=CIPK29 PE=2 SV=1	CBL-interacting protein kinase 29-like [Aegilops tauschii subsp. tauschii]	molecular function: catalytic activity (GO:0003824);; biological process: metabolic process (GO:0008152);; biological process: cellular process (GO:0009987);; molecular function: binding (GO:0005488);; cellular component: cell (GO:0005623);; cellular component: cell part (GO:0044464);; cellular component: organelle (GO:0043226);; cellular component: cell junction (GO:0030054);; biological process…	--
	Unigene_604722	CIPK29	0.0656043	-1.2749	normal	2.33e-06	-2.77919	down	Protein kinase domain;; Protein tyrosine and serine/threonine kinase;; Kinase-like;; NAF domain	CBL-interacting protein kinase 29 OS=Oryza sativa subsp. japonica OX=39947 GN=CIPK29 PE=2 SV=1	CBL-interacting protein kinase 29-like [Aegilops tauschii subsp. tauschii]	molecular function: catalytic activity (GO:0003824);; biological process: metabolic process (GO:0008152);; biological process: cellular process (GO:0009987);; molecular function: binding (GO:0005488);; cellular component: cell (GO:0005623);; cellular component: cell part (GO:0044464);; cellular component: organelle (GO:0043226);; cellular component: cell junction (GO:0030054);; biological process…	--
	Unigene_003260	CIPK31	0.0804905	-2.20046	normal	0.00159046	-4.93698	down	Protein kinase domain;; Protein tyrosine and serine/threonine kinase;; NAF domain;; Kinase-like;; Lipopolysaccharide kinase (Kdo/WaaP) family;; Serine hydrolase (FSH1)	CBL-interacting protein kinase 31 OS=Oryza sativa subsp. japonica OX=39947 GN=CIPK31 PE=1 SV=1	CBL-interacting protein kinase 31 [Brachypodium distachyon]	molecular function: catalytic activity (GO:0003824);; biological process: metabolic process (GO:0008152);; biological process: cellular process (GO:0009987);; molecular function: binding (GO:0005488);; cellular component: cell (GO:0005623);; cellular component: cell part (GO:0044464);; cellular component: organelle (GO:0043226);; biological process: signaling (GO:0023052);; biological process: si…	--
	Unigene_072172	CIPK31	0.075454	1.57593	normal	4.31e-06	2.81094	up	Protein kinase domain;; Protein tyrosine and serine/threonine kinase;; NAF domain;; Kinase-like;; Lipopolysaccharide kinase (Kdo/WaaP) family	CBL-interacting protein kinase 31 OS=Oryza sativa subsp. japonica OX=39947 GN=CIPK31 PE=1 SV=1	CBL-interacting protein kinase 31 [Hordeum vulgare subsp. spontaneum]	molecular function: catalytic activity (GO:0003824);; biological process: metabolic process (GO:0008152);; biological process: cellular process (GO:0009987);; molecular function: binding (GO:0005488);; cellular component: cell (GO:0005623);; cellular component: cell part (GO:0044464);; cellular component: organelle (GO:0043226);; biological process: signaling (GO:0023052);; biological process: si…	--
	Unigene_323038	CIPK31	1.21e-09	3.12096	up	7.38e-33	4.67626	up	Protein kinase domain;; Protein tyrosine and serine/threonine kinase;; NAF domain;; Kinase-like;; Lipopolysaccharide kinase (Kdo/WaaP) family	CBL-interacting protein kinase 31 OS=Oryza sativa subsp. japonica OX=39947 GN=CIPK31 PE=1 SV=1	--	molecular function: catalytic activity (GO:0003824);; biological process: metabolic process (GO:0008152);; biological process: cellular process (GO:0009987);; molecular function: binding (GO:0005488);; cellular component: cell (GO:0005623);; cellular component: cell part (GO:0044464);; cellular component: organelle (GO:0043226);; biological process: signaling (GO:0023052);; biological process: si…	--
	Unigene_529471	CIPK31	0.000428311	2.00736	up	6.42e-10	2.68156	up	Protein kinase domain;; Protein tyrosine and serine/threonine kinase;; Kinase-like;; Lipopolysaccharide kinase (Kdo/WaaP) family	CBL-interacting protein kinase 31 OS=Oryza sativa subsp. japonica OX=39947 GN=CIPK31 PE=1 SV=1	unnamed protein product [Triticum turgidum subsp. durum]	molecular function: catalytic activity (GO:0003824);; biological process: metabolic process (GO:0008152);; biological process: cellular process (GO:0009987);; molecular function: binding (GO:0005488);; cellular component: cell (GO:0005623);; cellular component: cell part (GO:0044464);; cellular component: organelle (GO:0043226);; biological process: signaling (GO:0023052);; biological process: si…	--
	Unigene_003074	CIPK32	0.0648356	1.48297	normal	3.07e-07	2.83427	up	Protein kinase domain;; Protein tyrosine and serine/threonine kinase;; Kinase-like;; NAF domain	CBL-interacting protein kinase 32 OS=Oryza sativa subsp. japonica OX=39947 GN=CIPK32 PE=2 SV=2	unnamed protein product [Triticum turgidum subsp. durum]	molecular function: catalytic activity (GO:0003824);; biological process: metabolic process (GO:0008152);; biological process: cellular process (GO:0009987);; molecular function: binding (GO:0005488);; cellular component: cell (GO:0005623);; cellular component: cell part (GO:0044464);; cellular component: organelle (GO:0043226);; biological process: signaling (GO:0023052);; biological process: si…	--
	Unigene_321882	CIPK32	0.0144611	1.39406	normal	1.66e-18	3.00603	up	Protein kinase domain;; Protein tyrosine and serine/threonine kinase;; NAF domain;; Kinase-like	CBL-interacting protein kinase 32 OS=Oryza sativa subsp. japonica OX=39947 GN=CIPK32 PE=2 SV=2	CBL-interacting protein kinase 32 [Aegilops tauschii subsp. tauschii]	molecular function: catalytic activity (GO:0003824);; biological process: metabolic process (GO:0008152);; biological process: cellular process (GO:0009987);; molecular function: binding (GO:0005488);; cellular component: cell (GO:0005623);; cellular component: cell part (GO:0044464);; cellular component: organelle (GO:0043226);; biological process: signaling (GO:0023052);; biological process: si…	--
Cyclic nucleotide-gated ion channel (CNGC)	Unigene_325535	CNGC1	0.862362	0.200832	normal	0.00279427	1.2403	up	Ion transport protein;; Cyclic nucleotide-binding domain	Cyclic nucleotide-gated ion channel 1 OS=Arabidopsis thaliana OX=3702 GN=CNGC1 PE=1 SV=1	cyclic nucleotide-gated ion channel 1 isoform X1 [Brachypodium distachyon]	molecular function: transporter activity (GO:0005215);; biological process: localization (GO:0051179);; cellular component: membrane (GO:0016020)	Plant-pathogen interaction (ko04626)
	Unigene_069405	CNGC2	0.00145819	2.07648	up	0.000205937	2.40293	up	--	Cyclic nucleotide-gated ion channel 2 OS=Arabidopsis thaliana OX=3702 GN=CNGC2 PE=1 SV=1	unnamed protein product [Triticum turgidum subsp. durum]	biological process: immune system process (GO:0002376);; molecular function: transporter activity (GO:0005215);; biological process: localization (GO:0051179);; molecular function: molecular transducer activity (GO:0060089);; biological process: cellular process (GO:0009987);; biological process: single-organism process (GO:0044699);; biological process: biological regulation (GO:0065007);; molec…	Plant-pathogen interaction (ko04626)
	Unigene_305475	CNGC7	4.37e-05	4.53342	up	0.00495556	3.87736	up	Ion transport protein	Putative cyclic nucleotide-gated ion channel 7 OS=Arabidopsis thaliana OX=3702 GN=CNGC7 PE=3 SV=1	predicted protein [Hordeum vulgare subsp. vulgare]	molecular function: transporter activity (GO:0005215);; biological process: localization (GO:0051179);; cellular component: membrane (GO:0016020)	Plant-pathogen interaction (ko04626)
	Unigene_324245	CNGC17	0.755624	0.304519	normal	0.00409987	1.18394	up	Ion transport protein;; Cyclic nucleotide-binding domain	Cyclic nucleotide-gated ion channel 17 OS=Arabidopsis thaliana OX=3702 GN=CNGC17 PE=1 SV=1	unnamed protein product [Triticum turgidum subsp. durum]	molecular function: transporter activity (GO:0005215);; biological process: localization (GO:0051179);; cellular component: membrane (GO:0016020)	Plant-pathogen interaction (ko04626)
Glutamate receptor(GLR)	Unigene_183871	GLR2.8	0.00169658	3.37694	up	--	--	--	Ligand-gated ion channel;; Bacterial extracellular solute-binding proteins, family 3	Glutamate receptor 2.8 OS=Arabidopsis thaliana OX=3702 GN=GLR2.8 PE=2 SV=2	unnamed protein product [Triticum turgidum subsp. durum]	molecular function: signal transducer activity (GO:0004871);; molecular function: transporter activity (GO:0005215);; molecular function: molecular transducer activity (GO:0060089);; biological process: cellular process (GO:0009987);; biological process: signaling (GO:0023052);; biological process: single-organism process (GO:0044699);; biological process: response to stimulus (GO:0050896);; biol…	--
	Unigene_196558	GLR2.8	0.552545	0.694269	normal	1.67e-08	3.46126	up	Receptor family ligand binding region;; Ligand-gated ion channel;; Bacterial extracellular solute-binding proteins, family 3;; Periplasmic binding protein	Glutamate receptor 2.8 OS=Arabidopsis thaliana OX=3702 GN=GLR2.8 PE=2 SV=2	glutamate receptor 2.8-like [Aegilops tauschii subsp. tauschii]	molecular function: signal transducer activity (GO:0004871);; molecular function: transporter activity (GO:0005215);; molecular function: molecular transducer activity (GO:0060089);; biological process: cellular process (GO:0009987);; biological process: signaling (GO:0023052);; biological process: single-organism process (GO:0044699);; biological process: response to stimulus (GO:0050896);; biol…	--
	Unigene_198740	GLR2.9	1.19e-05	2.67295	up	1.46e-12	3.40905	up	Receptor family ligand binding region;; Ligand-gated ion channel;; Periplasmic binding protein;; Bacterial extracellular solute-binding proteins, family 3;; Ligated ion channel L-glutamate- and glycine-binding site	Glutamate receptor 2.9 OS=Arabidopsis thaliana OX=3702 GN=GLR2.9 PE=2 SV=1	hypothetical protein CFC21_071703 [Triticum aestivum]	molecular function: signal transducer activity (GO:0004871);; molecular function: transporter activity (GO:0005215);; molecular function: molecular transducer activity (GO:0060089);; biological process: cellular process (GO:0009987);; biological process: signaling (GO:0023052);; biological process: single-organism process (GO:0044699);; biological process: response to stimulus (GO:0050896);; biol…	--
	Unigene_520819	GLR2.9	8.26e-06	2.8477	up	1.32e-06	2.5237	up	Receptor family ligand binding region;; Ligand-gated ion channel;; Periplasmic binding protein;; Bacterial extracellular solute-binding proteins, family 3;; Ligated ion channel L-glutamate- and glycine-binding site	Glutamate receptor 2.9 OS=Arabidopsis thaliana OX=3702 GN=GLR2.9 PE=2 SV=1	unnamed protein product [Triticum turgidum subsp. durum]	molecular function: signal transducer activity (GO:0004871);; molecular function: transporter activity (GO:0005215);; molecular function: molecular transducer activity (GO:0060089);; biological process: cellular process (GO:0009987);; biological process: signaling (GO:0023052);; biological process: single-organism process (GO:0044699);; biological process: response to stimulus (GO:0050896);; biol…	--
	Unigene_062540	GLR3.1	0.000174149	2.10372	up	1.6e-28	3.06164	up	Receptor family ligand binding region;; Ligand-gated ion channel;; Bacterial extracellular solute-binding proteins, family 3;; Periplasmic binding protein;; Ligated ion channel L-glutamate- and glycine-binding site	Glutamate receptor 3.1 OS=Oryza sativa subsp. japonica OX=39947 GN=GLR3.1 PE=1 SV=1	glutamate receptor 3.1 [Brachypodium distachyon]	molecular function: signal transducer activity (GO:0004871);; molecular function: transporter activity (GO:0005215);; molecular function: molecular transducer activity (GO:0060089);; biological process: cellular process (GO:0009987);; biological process: signaling (GO:0023052);; biological process: single-organism process (GO:0044699);; biological process: response to stimulus (GO:0050896);; biol…	--
	Unigene_062541	GLR3.1	0.0026326	1.94635	up	2.59e-18	3.07322	up	Ligand-gated ion channel;; Receptor family ligand binding region;; Bacterial extracellular solute-binding proteins, family 3;; Ligated ion channel L-glutamate- and glycine-binding site;; Uncharacterised conserved protein (DUF2371);; Receptor family ligand binding region;; Periplasmic binding protein	Glutamate receptor 3.1 OS=Oryza sativa subsp. japonica OX=39947 GN=GLR3.1 PE=1 SV=1	Glutamate receptor 3.1 [Hordeum vulgare]	molecular function: signal transducer activity (GO:0004871);; molecular function: transporter activity (GO:0005215);; molecular function: molecular transducer activity (GO:0060089);; biological process: cellular process (GO:0009987);; biological process: signaling (GO:0023052);; biological process: single-organism process (GO:0044699);; biological process: response to stimulus (GO:0050896);; biol…	--
	Unigene_529957	GLR3.1	0.064152	-1.99703	normal	2.07e-06	-6.26151	down	Receptor family ligand binding region;; Periplasmic binding protein;; Bacterial extracellular solute-binding proteins, family 3;; Ligated ion channel L-glutamate- and glycine-binding site;; Ligand-gated ion channel;; Ligand-gated ion channel;; Bacterial extracellular solute-binding proteins, family 3	Glutamate receptor 3.1 OS=Oryza sativa subsp. japonica OX=39947 GN=GLR3.1 PE=1 SV=1	unnamed protein product [Triticum turgidum subsp. durum]	molecular function: signal transducer activity (GO:0004871);; molecular function: transporter activity (GO:0005215);; molecular function: molecular transducer activity (GO:0060089);; biological process: cellular process (GO:0009987);; biological process: signaling (GO:0023052);; biological process: single-organism process (GO:0044699);; biological process: response to stimulus (GO:0050896);; biol…	--
	Unigene_073707	GLR3.3	4.9e-08	3.57306	up	7.92e-28	5.09591	up	Ligand-gated ion channel;; Bacterial extracellular solute-binding proteins, family 3	Glutamate receptor 3.3 OS=Arabidopsis thaliana OX=3702 GN=GLR3.3 PE=1 SV=1	glutamate receptor 3.4-like [Aegilops tauschii subsp. tauschii]	molecular function: signal transducer activity (GO:0004871);; molecular function: transporter activity (GO:0005215);; molecular function: molecular transducer activity (GO:0060089);; biological process: cellular process (GO:0009987);; biological process: signaling (GO:0023052);; biological process: single-organism process (GO:0044699);; biological process: response to stimulus (GO:0050896);; biol…	--
	Unigene_022558	GLR3.4	0.0172627	2.12432	normal	7.32e-05	2.64241	up	Ligand-gated ion channel;; Receptor family ligand binding region;; Bacterial extracellular solute-binding proteins, family 3;; Ligated ion channel L-glutamate- and glycine-binding site;; Receptor family ligand binding region	Glutamate receptor 3.4 OS=Arabidopsis thaliana OX=3702 GN=GLR3.4 PE=2 SV=2	glutamate receptor 3.4-like [Aegilops tauschii subsp. tauschii]	biological process: response to stimulus (GO:0050896);; molecular function: signal transducer activity (GO:0004871);; molecular function: molecular transducer activity (GO:0060089);; biological process: cellular process (GO:0009987);; biological process: signaling (GO:0023052);; biological process: single-organism process (GO:0044699);; biological process: biological regulation (GO:0065007);; mol…	--
	Unigene_022561	GLR3.4	0.00113593	2.8489	up	4.39e-06	3.29125	up	Receptor family ligand binding region;; Ligand-gated ion channel;; Periplasmic binding protein;; Bacterial extracellular solute-binding proteins, family 3;; Ligated ion channel L-glutamate- and glycine-binding site	Glutamate receptor 3.4 OS=Arabidopsis thaliana OX=3702 GN=GLR3.4 PE=2 SV=2	glutamate receptor 3.4 isoform X1 [Brachypodium distachyon]	biological process: response to stimulus (GO:0050896);; molecular function: signal transducer activity (GO:0004871);; molecular function: molecular transducer activity (GO:0060089);; biological process: cellular process (GO:0009987);; biological process: signaling (GO:0023052);; biological process: single-organism process (GO:0044699);; biological process: biological regulation (GO:0065007);; mol…	--
Annexin (ANN)	Unigene_591057	AnnGh1	0.000150879	-3.41606	down	1.11e-07	-6.26143	down	Annexin	Annexin Gh1 (Fragment) OS=Gossypium hirsutum OX=3635 GN=AnnGh1 PE=1 SV=2	annexin D1 [Brachypodium distachyon]	biological process: response to stimulus (GO:0050896);; molecular function: binding (GO:0005488);; cellular component: extracellular region (GO:0005576);; cellular component: cell (GO:0005623);; cellular component: cell part (GO:0044464);; cellular component: organelle (GO:0043226);; biological process: localization (GO:0051179);; biological process: single-organism process (GO:0044699);; cellula…	--
	Unigene_050663	AnnGh1	0.00315132	-2.62693	down	1.13e-05	-4.45217	down	Annexin	Annexin Gh1 (Fragment) OS=Gossypium hirsutum OX=3635 GN=AnnGh1 PE=1 SV=2	hypothetical protein CFC21_108225 [Triticum aestivum]	biological process: response to stimulus (GO:0050896);; molecular function: binding (GO:0005488);; cellular component: extracellular region (GO:0005576);; cellular component: cell (GO:0005623);; cellular component: cell part (GO:0044464);; cellular component: organelle (GO:0043226);; biological process: localization (GO:0051179);; biological process: single-organism process (GO:0044699);; cellula…	--
	Unigene_323518	ANN3	0.00101172	-2.45576	down	8.13e-05	-1.95698	down	Annexin	Annexin D3 OS=Arabidopsis thaliana OX=3702 GN=ANN3 PE=2 SV=2	annexin D3-like [Aegilops tauschii subsp. tauschii]	biological process: response to stimulus (GO:0050896);; molecular function: binding (GO:0005488);; cellular component: cell (GO:0005623);; cellular component: cell part (GO:0044464);; cellular component: organelle (GO:0043226)	--
	Unigene_066583	ANN4	4.77e-06	-3.91294	down	5.38e-19	-6.19295	down	Annexin	Annexin D4 OS=Arabidopsis thaliana OX=3702 GN=ANN4 PE=1 SV=1	hypothetical protein CFC21_007244 [Triticum aestivum]	biological process: response to stimulus (GO:0050896);; molecular function: binding (GO:0005488);; cellular component: cell junction (GO:0030054);; cellular component: symplast (GO:0055044)	--
	Unigene_187140	ANN4	0.00224762	-3.48612	down	1.96e-11	-6.56961	down	Annexin	Annexin D4 OS=Arabidopsis thaliana OX=3702 GN=ANN4 PE=1 SV=1	hypothetical protein CFC21_007244 [Triticum aestivum]	biological process: response to stimulus (GO:0050896);; molecular function: binding (GO:0005488);; cellular component: cell junction (GO:0030054);; cellular component: symplast (GO:0055044)	--
	Unigene_596910	ANN4	3.35e-06	-3.77211	down	1.54e-09	-9.35051	down	Annexin	Annexin D4 OS=Arabidopsis thaliana OX=3702 GN=ANN4 PE=1 SV=1	hypothetical protein CFC21_007244 [Triticum aestivum]	biological process: response to stimulus (GO:0050896);; molecular function: binding (GO:0005488);; cellular component: cell junction (GO:0030054);; cellular component: symplast (GO:0055044)	--
Calcium permeable stress-gated cation channel 1(CSC1)	Unigene_074829	CSC1	0.38862	0.736231	normal	0.00152741	2.2863	up	Calcium-dependent channel, 7TM region, putative phosphate;; Late exocytosis, associated with Golgi transport;; Cytosolic domain of 10TM putative phosphate transporter	Calcium permeable stress-gated cation channel 1 OS=Arabidopsis thaliana OX=3702 GN=CSC1 PE=1 SV=1	hypothetical protein CFC21_000349 [Triticum aestivum]	molecular function: transporter activity (GO:0005215);; biological process: localization (GO:0051179);; cellular component: cell (GO:0005623);; cellular component: membrane (GO:0016020);; cellular component: cell part (GO:0044464);; biological process: response to stimulus (GO:0050896);; biological process: cellular process (GO:0009987);; biological process: biological regulation (GO:0065007);; b…	--
	Unigene_198958	CSC1	0.336714	0.880455	normal	0.000581708	1.99062	up	Calcium-dependent channel, 7TM region, putative phosphate;; Late exocytosis, associated with Golgi transport;; Cytosolic domain of 10TM putative phosphate transporter	Calcium permeable stress-gated cation channel 1 OS=Arabidopsis thaliana OX=3702 GN=CSC1 PE=1 SV=1	hypothetical protein CFC21_000349 [Triticum aestivum]	molecular function: transporter activity (GO:0005215);; biological process: localization (GO:0051179);; cellular component: cell (GO:0005623);; cellular component: membrane (GO:0016020);; cellular component: cell part (GO:0044464);; biological process: response to stimulus (GO:0050896);; biological process: cellular process (GO:0009987);; biological process: biological regulation (GO:0065007);; b…	--
	Unigene_325715	CSC1	0.620926	0.529631	normal	0.000126158	1.82314	up	Calcium-dependent channel, 7TM region, putative phosphate;; Late exocytosis, associated with Golgi transport;; Cytosolic domain of 10TM putative phosphate transporter	Calcium permeable stress-gated cation channel 1 OS=Arabidopsis thaliana OX=3702 GN=CSC1 PE=1 SV=1	CSC1-like protein At3g21620 [Brachypodium distachyon]	molecular function: transporter activity (GO:0005215);; biological process: localization (GO:0051179);; cellular component: cell (GO:0005623);; cellular component: membrane (GO:0016020);; cellular component: cell part (GO:0044464);; biological process: response to stimulus (GO:0050896);; biological process: cellular process (GO:0009987);; biological process: biological regulation (GO:0065007);; b…	--
	Unigene_604162	CSC1	0.723064	-0.432739	normal	8.3e-09	-4.70924	down	Calcium-dependent channel, 7TM region, putative phosphate;; Cytosolic domain of 10TM putative phosphate transporter;; Late exocytosis, associated with Golgi transport	Calcium permeable stress-gated cation channel 1 OS=Arabidopsis thaliana OX=3702 GN=CSC1 PE=1 SV=1	calcium permeable stress-gated cation channel 1 isoform X1 [Brachypodium distachyon]	molecular function: transporter activity (GO:0005215);; biological process: localization (GO:0051179);; cellular component: cell (GO:0005623);; cellular component: membrane (GO:0016020);; cellular component: cell part (GO:0044464);; biological process: response to stimulus (GO:0050896);; biological process: cellular process (GO:0009987);; biological process: biological regulation (GO:0065007);; b…	--

## Sheet: Co-induced
Gene classification	ID	Gene name	R0_vs_R3_DESeq2_FDR	R0_vs_R3_DESeq2_log2FC	R0_vs_R3_regulated	R0_vs_R6_DESeq2_FDR	R0_vs_R6_DESeq2_log2FC	R0_vs_R6_regulated	S0_vs_S3_DESeq2_FDR	S0_vs_S3_DESeq2_log2FC	S0_vs_S3_regulated	S0_vs_S6_DESeq2_FDR	S0_vs_S6_DESeq2_log2FC	S0_vs_S6_regulated	L0_vs_L3_DESeq2_FDR	L0_vs_L3_DESeq2_log2FC	L0_vs_L3_regulated	L0_vs_L2_DESeq2_FDR	L0_vs_L6_DESeq2_log2FC	L0_vs_L6_regulated	Pfam_annotation	Swissprot_annotation	TrEMBL_annotation	nr_annotation	GO_second_level_annotation	KEGG_pathway_annotation
Receptor-like kinase (RLK)	Unigene_520577	CRCK2	0.000252499	5.57618	up	0.0540326	3.17332	normal	4.41333e-05	-5.14532	down	1.34251e-05	-5.2901	down	4.98892e-07	-6.77662	down	0.00140097	-3.18059	down	Protein tyrosine and serine/threonine kinase;; Protein kinase domain	Calmodulin-binding receptor-like cytoplasmic kinase 2 OS=Arabidopsis thaliana OX=3702 GN=CRCK2 PE=2 SV=1	Protein kinase domain-containing protein OS=Aegilops tauschii subsp. strangulata OX=200361 PE=4 SV=1	calmodulin-binding receptor-like cytoplasmic kinase 2 [Aegilops tauschii subsp. tauschii]	molecular function: catalytic activity (GO:0003824);; biological process: metabolic process (GO:0008152);; biological process: cellular process (GO:0009987);; biological process: multicellular organismal process (GO:0032501);; biological process: developmental process (GO:0032502);; biological process: single-organism process (GO:0044699)	Plant-pathogen interaction (ko04626)
Calmodulin-like protein (CML)	Unigene_588216	CML27	4.32787e-05	5.81146	up	0.0152019	3.74257	normal	0.000290895	-5.06001	down	0.301197	-2.10197	normal	1.29779e-05	-6.22854	down	0.719533	0.512933	normal	EF hand;; EF-hand domain;; EF-hand domain pair;; EF hand;; EF-hand domain pair;; Cytoskeletal-regulatory complex EF hand	Probable calcium-binding protein CML27 OS=Oryza sativa subsp. japonica OX=39947 GN=CML27 PE=2 SV=1	Uncharacterized protein OS=Triticum aestivum OX=4565 PE=4 SV=1	hypothetical protein CFC21_052114 [Triticum aestivum]	biological process: cellular process (GO:0009987);; biological process: developmental process (GO:0032502);; biological process: single-organism process (GO:0044699);; biological process: cellular component organization or biogenesis (GO:0071840);; molecular function: binding (GO:0005488);; biological process: response to stimulus (GO:0050896)	Plant-pathogen interaction (ko04626)
	Unigene_515274	CML16	0.000118265	5.69392	up	0.249519	1.6507	normal	0.000208478	-5.36594	down	0.0710977	-2.67389	normal	6.49411e-06	-5.49009	down	0.0960526	-1.63299	normal	EF hand;; EF-hand domain pair;; EF hand;; EF-hand domain;; EF-hand domain pair;; Dockerin type I domain;; Secreted protein acidic and rich in cysteine Ca binding region	Probable calcium-binding protein CML16 OS=Oryza sativa subsp. japonica OX=39947 GN=CML16 PE=2 SV=1	Predicted protein (Fragment) OS=Hordeum vulgare subsp. vulgare OX=112509 PE=2 SV=1	predicted protein, partial [Hordeum vulgare subsp. vulgare]	molecular function: binding (GO:0005488);; cellular component: cell (GO:0005623);; cellular component: cell part (GO:0044464);; cellular component: organelle (GO:0043226);; cellular component: membrane (GO:0016020)	Plant-pathogen interaction (ko04626)
	Unigene_003177	CML14	0.000411503	4.49844	up	0.010198	3.42637	normal	0.00569534	-3.41242	down	0.110709	-1.99985	normal	0.000148095	-4.69418	down	0.808731	-0.373358	normal	EF hand;; EF-hand domain pair;; EF-hand domain;; EF hand;; EF-hand domain pair;; Cytoskeletal-regulatory complex EF hand	Probable calcium-binding protein CML14 OS=Oryza sativa subsp. japonica OX=39947 GN=CML14 PE=2 SV=1	Putative calcium-binding protein CML14 OS=Panicum miliaceum OX=4540 GN=C2845_PM05G28360 PE=4 SV=1	putative calcium-binding protein CML14 [Panicum miliaceum]	molecular function: binding (GO:0005488)	Plant-pathogen interaction (ko04626)
	Unigene_021550	CML45	0.00471822	3.54048	up	0.0192335	2.85732	normal	0.00872303	-2.81413	down	9.45608e-07	-4.01494	down	3.3026e-10	-5.97931	down	0.0271512	-1.99909	normal	EF hand;; EF hand;; EF-hand domain;; EF-hand domain pair;; EF-hand domain pair	Probable calcium-binding protein CML45 OS=Arabidopsis thaliana OX=3702 GN=CML45 PE=2 SV=1	Uncharacterized protein OS=Triticum turgidum subsp. durum OX=4567 GN=TRITD_5Av1G145100 PE=4 SV=1	hypothetical protein CFC21_066031 [Triticum aestivum]	molecular function: binding (GO:0005488);; cellular component: cell (GO:0005623);; cellular component: cell part (GO:0044464);; cellular component: organelle (GO:0043226)	MAPK signaling pathway - plant (ko04016);; Phosphatidylinositol signaling system (ko04070);; Plant-pathogen interaction (ko04626)
	Unigene_186960	CML15	0.00387271	3.80743	up	0.0813887	2.30262	normal	0.00208593	-3.44428	down	0.804545	-0.544728	normal	3.4697e-11	-6.8908	down	0.863215	-0.243543	normal	EF hand;; EF-hand domain pair;; EF hand;; EF-hand domain;; EF-hand domain pair;; Secreted protein acidic and rich in cysteine Ca binding region;; Dockerin type I domain	Probable calcium-binding protein CML15 OS=Oryza sativa subsp. japonica OX=39947 GN=CML15 PE=2 SV=1	Uncharacterized protein OS=Aegilops tauschii subsp. strangulata OX=200361 PE=4 SV=1	polcalcin Jun o 2 [Hordeum vulgare]	molecular function: binding (GO:0005488);; cellular component: cell (GO:0005623);; cellular component: cell part (GO:0044464);; cellular component: organelle (GO:0043226);; biological process: response to stimulus (GO:0050896);; biological process: multicellular organismal process (GO:0032501);; biological process: developmental process (GO:0032502);; biological process: single-organism process (…	Plant-pathogen interaction (ko04626)
	Unigene_320381	CML25	0.000414396	4.92278	up	0.00969126	4.01861	up	0.000160841	-4.36891	down	0.014571	-3.68096	normal	2.92979e-15	-8.48826	down	0.0714917	-1.66122	normal	EF hand;; EF-hand domain;; EF-hand domain pair;; EF hand;; EF-hand domain pair	Probable calcium-binding protein CML25 OS=Arabidopsis thaliana OX=3702 GN=CML25 PE=2 SV=1	Uncharacterized protein OS=Aegilops tauschii subsp. strangulata OX=200361 PE=4 SV=1	probable calcium-binding protein CML35 [Aegilops tauschii subsp. tauschii]	molecular function: binding (GO:0005488);; cellular component: cell (GO:0005623);; cellular component: membrane (GO:0016020);; cellular component: cell part (GO:0044464);; biological process: response to stimulus (GO:0050896);; biological process: multi-organism process (GO:0051704)	Plant-pathogen interaction (ko04626)
	Unigene_199398	CML16	2.5757e-05	6.03054	up	0.0157013	3.38908	normal	0.00250327	-3.93621	down	0.268422	-1.72918	normal	2.89569e-07	-5.60132	down	0.535177	-0.838585	normal	EF hand;; EF hand;; EF-hand domain pair;; EF-hand domain;; EF-hand domain pair;; Secreted protein acidic and rich in cysteine Ca binding region;; Dockerin type I domain	Probable calcium-binding protein CML16 OS=Oryza sativa subsp. japonica OX=39947 GN=CML16 PE=2 SV=1	Predicted protein (Fragment) OS=Hordeum vulgare subsp. vulgare OX=112509 PE=2 SV=1	predicted protein, partial [Hordeum vulgare subsp. vulgare]	molecular function: binding (GO:0005488);; cellular component: cell (GO:0005623);; cellular component: cell part (GO:0044464);; cellular component: organelle (GO:0043226);; cellular component: membrane (GO:0016020)	Plant-pathogen interaction (ko04626)
Ca2+-dependent protein kinase (CPK/CDPK)	Unigene_595638	CPK4	9.06373e-05	5.51973	up	0.0300845	3.44198	normal	2.01824e-05	-5.21134	down	0.00391316	-3.66798	down	0.00212978	-4.62145	down	0.976947	0.0496059	normal	Protein kinase domain;; Protein tyrosine and serine/threonine kinase;; EF hand;; EF hand;; EF-hand domain pair;; EF-hand domain;; EF-hand domain pair;; Kinase-like;; Secreted protein acidic and rich in cysteine Ca binding region	Calcium-dependent protein kinase 4 OS=Oryza sativa subsp. japonica OX=39947 GN=CPK4 PE=2 SV=1	Uncharacterized protein OS=Brachypodium distachyon OX=15368 GN=100831655 PE=4 SV=1	--	biological process: response to stimulus (GO:0050896);; biological process: biological regulation (GO:0065007);; molecular function: catalytic activity (GO:0003824);; biological process: metabolic process (GO:0008152);; biological process: cellular process (GO:0009987);; molecular function: binding (GO:0005488);; cellular component: cell (GO:0005623);; cellular component: cell part (GO:0044464);;…	Plant-pathogen interaction (ko04626)
CBL-interaction protein kinase (CIPK)	Unigene_527539	CIPK29	0.000942095	4.33904	up	0.00581844	3.54193	up	0.000358139	-3.86374	down	0.000176719	-4.16228	down	6.03959e-08	-5.41665	down	0.00168706	-2.87225	down	Protein kinase domain;; Protein tyrosine and serine/threonine kinase;; Kinase-like;; NAF domain	CBL-interacting protein kinase 29 OS=Oryza sativa subsp. japonica OX=39947 GN=CIPK29 PE=2 SV=1	Non-specific serine/threonine protein kinase OS=Hordeum vulgare subsp. vulgare OX=112509 PE=3 SV=1	CBL-interacting protein kinase 29-like [Aegilops tauschii subsp. tauschii]	molecular function: catalytic activity (GO:0003824);; biological process: metabolic process (GO:0008152);; biological process: cellular process (GO:0009987);; molecular function: binding (GO:0005488);; cellular component: cell (GO:0005623);; cellular component: cell part (GO:0044464);; cellular component: organelle (GO:0043226);; cellular component: cell junction (GO:0030054);; biological process…	Plant-pathogen interaction (ko04626)
	Unigene_153050	CIPK29	0.000967218	4.92123	up	0.0612213	3.15136	normal	0.00678783	-3.68861	down	0.0240617	-3.43598	normal	1.0825e-05	-6.37046	down	0.00572694	-3.10768	down	--	CBL-interacting protein kinase 29 OS=Oryza sativa subsp. japonica OX=39947 GN=CIPK29 PE=2 SV=1	Non-specific serine/threonine protein kinase OS=Hordeum vulgare subsp. vulgare OX=112509 PE=3 SV=1	Os07g0678300, partial [Oryza sativa Japonica Group]	molecular function: catalytic activity (GO:0003824);; biological process: metabolic process (GO:0008152);; biological process: cellular process (GO:0009987);; cellular component: cell (GO:0005623);; cellular component: cell part (GO:0044464);; cellular component: organelle (GO:0043226);; cellular component: cell junction (GO:0030054);; biological process: signaling (GO:0023052);; biological proce…	--
	Unigene_322906	CIPK12	0.187459	-1.75724	normal	7.17093e-08	-1.9048	down	2.43908e-06	5.99985	up	2.20891e-05	5.23329	up	9.09668e-16	3.86941	up	9.50194e-06	2.91797	up	Protein kinase domain;; NAF domain;; Protein tyrosine and serine/threonine kinase	CBL-interacting protein kinase 12 OS=Oryza sativa subsp. japonica OX=39947 GN=CIPK12 PE=1 SV=1	Non-specific serine/threonine protein kinase OS=Hordeum vulgare subsp. vulgare OX=112509 PE=3 SV=1	--	molecular function: catalytic activity (GO:0003824);; biological process: metabolic process (GO:0008152);; biological process: cellular process (GO:0009987);; molecular function: binding (GO:0005488);; cellular component: cell (GO:0005623);; cellular component: cell part (GO:0044464);; biological process: signaling (GO:0023052);; biological process: single-organism process (GO:0044699);; biologic…	Plant-pathogen interaction (ko04626)
	Unigene_525385	CIPK17	0.00679169	3.39505	up	0.638056	0.372857	normal	0.432064	-1.10015	normal	2.661e-08	-3.79218	down	2.97561e-13	-3.92854	down	0.000445059	-2.24515	down	Protein kinase domain;; Protein tyrosine and serine/threonine kinase;; NAF domain	CBL-interacting protein kinase 17 OS=Oryza sativa subsp. japonica OX=39947 GN=CIPK17 PE=2 SV=1	Non-specific serine/threonine protein kinase OS=Hordeum vulgare subsp. vulgare OX=112509 PE=3 SV=1	CBL-interacting protein kinase 17 [Hordeum vulgare subsp. spontaneum]	biological process: response to stimulus (GO:0050896);; molecular function: catalytic activity (GO:0003824);; biological process: metabolic process (GO:0008152);; biological process: cellular process (GO:0009987);; molecular function: binding (GO:0005488);; cellular component: cell (GO:0005623);; cellular component: cell part (GO:0044464);; cellular component: organelle (GO:0043226);; cellular co…	--
	Unigene_074585	CIPK19	0.162409	-1.50571	normal	0.000342438	-1.66061	down	2.15463e-05	4.65239	up	0.000324039	3.8936	up	3.28605e-08	2.20798	up	0.0137959	1.75285	normal	Flavin containing amine oxidoreductase;; Pyridine nucleotide-disulphide oxidoreductase;; NAD(P)-binding Rossmann-like domain;; Protein kinase domain;; Protein tyrosine and serine/threonine kinase	CBL-interacting protein kinase 19 OS=Oryza sativa subsp. japonica OX=39947 GN=CIPK19 PE=1 SV=1	Amino_oxidase domain-containing protein OS=Oryza glumipatula OX=40148 PE=4 SV=1	uncharacterized protein LOC4336652 [Oryza sativa Japonica Group]	molecular function: catalytic activity (GO:0003824);; biological process: metabolic process (GO:0008152);; biological process: cellular process (GO:0009987);; molecular function: binding (GO:0005488);; biological process: single-organism process (GO:0044699)	Plant-pathogen interaction (ko04626)
	Unigene_020918	CIPK23	0.00051817	5.16947	up	0.131224	2.42848	normal	2.21044e-05	-4.75283	down	0.0359303	-2.96641	normal	0.00202683	-4.81015	down	0.656988	0.697278	normal	Protein kinase domain;; Protein tyrosine and serine/threonine kinase;; NAF domain;; Kinase-like	CBL-interacting protein kinase 23 OS=Oryza sativa subsp. japonica OX=39947 GN=CIPK23 PE=2 SV=1	Non-specific serine/threonine protein kinase OS=Triticum aestivum OX=4565 GN=CIPK23 PE=2 SV=1	CBL-interacting protein kinase 23 [Hordeum vulgare subsp. spontaneum]	biological process: response to stimulus (GO:0050896);; molecular function: catalytic activity (GO:0003824);; biological process: metabolic process (GO:0008152);; biological process: cellular process (GO:0009987);; molecular function: binding (GO:0005488);; cellular component: cell (GO:0005623);; cellular component: cell part (GO:0044464);; cellular component: organelle (GO:0043226);; cellular co…	--
Cyclic nucleotide-gated ion channel (CNGC)	Unigene_058417	CNGC20	0.000208242	5.45107	up	0.0180914	3.72799	normal	0.00908672	-3.11329	down	0.0530611	-2.62995	normal	0.00146495	-3.6275	down	0.89101	0.202773	normal	Ion transport protein	Probable cyclic nucleotide-gated ion channel 20, chloroplastic OS=Arabidopsis thaliana OX=3702 GN=CNGC20 PE=2 SV=1	Cyclic nucleotide-binding domain-containing protein OS=Brachypodium distachyon OX=15368 GN=100824699 PE=4 SV=1	probable cyclic nucleotide-gated ion channel 20, chloroplastic [Brachypodium distachyon]	molecular function: transporter activity (GO:0005215);; biological process: localization (GO:0051179);; cellular component: membrane (GO:0016020)	Plant-pathogen interaction (ko04626)
Calcium permeable stress-gated cation channel 1(CSC1)	Unigene_074829	CSC1	0.542864	-1.14399	normal	2.08618e-05	-2.29126	down	--	--	--	4.56075e-10	10.7415	up	0.00152741	2.2863	up	0.38862	0.736231	normal	Calcium-dependent channel, 7TM region, putative phosphate;; Late exocytosis, associated with Golgi transport;; Cytosolic domain of 10TM putative phosphate transporter	Calcium permeable stress-gated cation channel 1 OS=Arabidopsis thaliana OX=3702 GN=CSC1 PE=1 SV=1	Uncharacterized protein OS=Triticum turgidum subsp. durum OX=4567 GN=TRITD_1Av1G005870 PE=3 SV=1	hypothetical protein CFC21_000349 [Triticum aestivum]	molecular function: transporter activity (GO:0005215);; biological process: localization (GO:0051179);; cellular component: cell (GO:0005623);; cellular component: membrane (GO:0016020);; cellular component: cell part (GO:0044464);; biological process: response to stimulus (GO:0050896);; biological process: cellular process (GO:0009987);; biological process: biological regulation (GO:0065007);; b…	--
	Unigene_198958	CSC1	0.557775	-0.839773	normal	0.000561358	-1.9767	down	0.00795818	3.40759	up	0.0030176	2.79171	up	0.000581708	1.99062	up	0.336714	0.880455	normal	Calcium-dependent channel, 7TM region, putative phosphate;; Late exocytosis, associated with Golgi transport;; Cytosolic domain of 10TM putative phosphate transporter	Calcium permeable stress-gated cation channel 1 OS=Arabidopsis thaliana OX=3702 GN=CSC1 PE=1 SV=1	Uncharacterized protein OS=Triticum turgidum subsp. durum OX=4567 GN=TRITD_1Av1G005870 PE=3 SV=1	hypothetical protein CFC21_000349 [Triticum aestivum]	molecular function: transporter activity (GO:0005215);; biological process: localization (GO:0051179);; cellular component: cell (GO:0005623);; cellular component: membrane (GO:0016020);; cellular component: cell part (GO:0044464);; biological process: response to stimulus (GO:0050896);; biological process: cellular process (GO:0009987);; biological process: biological regulation (GO:0065007);; b…	--
