# Supplementary material for: Tissue-Specific Transcriptomic Analysis Reveals the Response Mechanism of Cold Stress in Poa crymophila, a Native Grass in Qinghai-Tibet Plateau
Source: Preprints.org preprint supplement (doi:10.20944/preprints202311.0336.v1), 2023-11-06
Supplement: Supplementary file 25 [file Table S9 Differently expressed genes related to ROS scavenging system of roots, stems and leaves under cold stress.xlsx]

## Sheet: Roots
Table S9 Differently expressed genes related to ROS scavenging system of roots, stems and leaves under cold stress.
Gene classification	ID	Gene name	R0_vs_R3_DESeq2_FDR	R0_vs_R3_DESeq2_log2FC	R0_vs_R3_regulated	R0_vs_R6_DESeq2_FDR	R0_vs_R6_DESeq2_log2FC	R0_vs_R6_regulated	Pfam_annotation	Swissprot_annotation	nr_annotation	GO_second_level_annotation	KEGG_pathway_annotation
Superoxide dismutase (SOD)	Unigene_518506	SODA.4	0.0590793	3.05429	normal	0.00864998	4.12409	up	Iron/manganese superoxide dismutases, alpha-hairpin domain;; Iron/manganese superoxide dismutases, C-terminal domain	Superoxide dismutase [Mn] 3.1, mitochondrial OS=Zea mays OX=4577 GN=SODA.4 PE=2 SV=1	superoxide dismutase [Mn] 3.1, mitochondrial [Brachypodium distachyon]	biological process: response to stimulus (GO:0050896);; molecular function: catalytic activity (GO:0003824);; molecular function: antioxidant activity (GO:0016209);; biological process: metabolic process (GO:0008152);; biological process: cellular process (GO:0009987);; biological process: single-organism process (GO:0044699);; biological process: detoxification (GO:0098754);; molecular function:…	Peroxisome (ko04146)
Catalase (CAT)	Unigene_524508	CAT1	0.0473681	3.00495	normal	0.000119378	5.46556	up	Catalase;; Catalase-related immune-responsive	Catalase isozyme 1 OS=Hordeum vulgare OX=4513 GN=CAT1 PE=2 SV=1	catalase [Puccinellia chinampoensis]	biological process: response to stimulus (GO:0050896);; molecular function: catalytic activity (GO:0003824);; molecular function: antioxidant activity (GO:0016209);; biological process: metabolic process (GO:0008152);; biological process: cellular process (GO:0009987);; biological process: single-organism process (GO:0044699);; biological process: detoxification (GO:0098754);; molecular function:…	Tryptophan metabolism (ko00380);; Glyoxylate and dicarboxylate metabolism (ko00630);; Carbon metabolism (ko01200);; MAPK signaling pathway - plant (ko04016);; Peroxisome (ko04146)
Peroxidases (POD)	Unigene_033554	GSVIVT00037159001	0.00225091	3.01146	up	0.00309243	3.48718	up	Peroxidase;; Peroxidase	Peroxidase 5 OS=Vitis vinifera OX=29760 GN=GSVIVT00037159001 PE=1 SV=2	Peroxidase 1 [Hordeum vulgare]	molecular function: catalytic activity (GO:0003824);; molecular function: antioxidant activity (GO:0016209);; biological process: metabolic process (GO:0008152);; biological process: cellular process (GO:0009987);; biological process: single-organism process (GO:0044699);; biological process: response to stimulus (GO:0050896);; biological process: detoxification (GO:0098754);; molecular function:…	Phenylpropanoid biosynthesis (ko00940)
	Unigene_182490	HRPN	0.00720455	1.90475	up	0.00422916	3.20038	up	Peroxidase	Peroxidase N OS=Armoracia rusticana OX=3704 GN=HRPN PE=2 SV=1	hypothetical protein CFC21_010640 [Triticum aestivum]	molecular function: catalytic activity (GO:0003824);; molecular function: antioxidant activity (GO:0016209);; biological process: metabolic process (GO:0008152);; biological process: cellular process (GO:0009987);; biological process: single-organism process (GO:0044699);; biological process: response to stimulus (GO:0050896);; biological process: detoxification (GO:0098754);; cellular component:…	Phenylpropanoid biosynthesis (ko00940)
	Unigene_042156	PER1	0.0409387	3.24026	normal	0.000357155	5.46594	up	Peroxidase	Peroxidase 1 OS=Zea mays OX=4577 GN=PER1 PE=1 SV=1	peroxidase 1 [Brachypodium distachyon]	--	Phenylpropanoid biosynthesis (ko00940)
	Unigene_006048	PER2	3.13786e-05	4.24566	up	0.000229695	3.80157	up	Peroxidase	Peroxidase 2 OS=Zea mays OX=4577 GN=PER2 PE=2 SV=1	peroxidase 2-like [Aegilops tauschii subsp. tauschii]	molecular function: catalytic activity (GO:0003824);; molecular function: antioxidant activity (GO:0016209);; biological process: metabolic process (GO:0008152);; biological process: cellular process (GO:0009987);; biological process: single-organism process (GO:0044699);; biological process: response to stimulus (GO:0050896);; biological process: detoxification (GO:0098754);; molecular function:…	Phenylpropanoid biosynthesis (ko00940)
	Unigene_047333	PER2	7.07267e-07	4.36269	up	1.05926e-06	6.32206	up	Peroxidase	Peroxidase 2 OS=Zea mays OX=4577 GN=PER2 PE=2 SV=1	hypothetical protein CFC21_015823 [Triticum aestivum]	molecular function: catalytic activity (GO:0003824);; molecular function: antioxidant activity (GO:0016209);; biological process: metabolic process (GO:0008152);; biological process: cellular process (GO:0009987);; biological process: single-organism process (GO:0044699);; biological process: response to stimulus (GO:0050896);; biological process: detoxification (GO:0098754);; molecular function:…	Phenylpropanoid biosynthesis (ko00940)
	Unigene_188333	PER2	0.00235984	3.7566	up	0.0110063	3.20604	normal	Peroxidase	Peroxidase 2 OS=Zea mays OX=4577 GN=PER2 PE=2 SV=1	peroxidase 2-like [Aegilops tauschii subsp. tauschii]	molecular function: catalytic activity (GO:0003824);; molecular function: antioxidant activity (GO:0016209);; biological process: metabolic process (GO:0008152);; biological process: cellular process (GO:0009987);; biological process: single-organism process (GO:0044699);; biological process: response to stimulus (GO:0050896);; biological process: detoxification (GO:0098754);; molecular function:…	Phenylpropanoid biosynthesis (ko00940)
	Unigene_311832	PER2	0.00421782	4.47074	up	1.81805e-07	7.14172	up	Peroxidase	Peroxidase 2 OS=Zea mays OX=4577 GN=PER2 PE=2 SV=1	unnamed protein product [Triticum turgidum subsp. durum]	molecular function: catalytic activity (GO:0003824);; molecular function: antioxidant activity (GO:0016209);; biological process: metabolic process (GO:0008152);; biological process: cellular process (GO:0009987);; biological process: single-organism process (GO:0044699);; biological process: response to stimulus (GO:0050896);; biological process: detoxification (GO:0098754);; molecular function:…	Phenylpropanoid biosynthesis (ko00940)
	Unigene_311833	PER2	--	--	--	3.29577e-07	8.59341	up	Peroxidase	Peroxidase 2 OS=Zea mays OX=4577 GN=PER2 PE=2 SV=1	hypothetical protein CFC21_012782 [Triticum aestivum]	molecular function: catalytic activity (GO:0003824);; molecular function: antioxidant activity (GO:0016209);; biological process: metabolic process (GO:0008152);; biological process: cellular process (GO:0009987);; biological process: single-organism process (GO:0044699);; biological process: response to stimulus (GO:0050896);; biological process: detoxification (GO:0098754);; molecular function:…	Phenylpropanoid biosynthesis (ko00940)
	Unigene_321137	PER12	0.00227757	2.28054	up	0.00101054	3.55329	up	Peroxidase	Peroxidase 12 OS=Arabidopsis thaliana OX=3702 GN=PER12 PE=1 SV=1	peroxidase 12 [Brachypodium distachyon]	molecular function: catalytic activity (GO:0003824);; molecular function: antioxidant activity (GO:0016209);; biological process: metabolic process (GO:0008152);; biological process: cellular process (GO:0009987);; biological process: single-organism process (GO:0044699);; biological process: response to stimulus (GO:0050896);; biological process: detoxification (GO:0098754);; molecular function:…	Phenylpropanoid biosynthesis (ko00940)
	Unigene_522965	PER21	0.00456634	3.31292	up	0.000406891	5.10697	up	Peroxidase	Peroxidase 21 OS=Arabidopsis thaliana OX=3702 GN=PER21 PE=1 SV=1	hypothetical protein CFC21_021494 [Triticum aestivum]	molecular function: catalytic activity (GO:0003824);; molecular function: antioxidant activity (GO:0016209);; biological process: metabolic process (GO:0008152);; biological process: cellular process (GO:0009987);; biological process: single-organism process (GO:0044699);; biological process: response to stimulus (GO:0050896);; biological process: detoxification (GO:0098754);; cellular component:…	Phenylpropanoid biosynthesis (ko00940)
	Unigene_061994	PER35	0.000156631	1.78022	up	0.035454	2.02145	normal	Peroxidase	Peroxidase 35 OS=Arabidopsis thaliana OX=3702 GN=PER35 PE=1 SV=1	peroxidase 35-like [Aegilops tauschii subsp. tauschii]	molecular function: catalytic activity (GO:0003824);; molecular function: antioxidant activity (GO:0016209);; biological process: metabolic process (GO:0008152);; biological process: cellular process (GO:0009987);; biological process: single-organism process (GO:0044699);; biological process: response to stimulus (GO:0050896);; biological process: detoxification (GO:0098754);; molecular function:…	Phenylpropanoid biosynthesis (ko00940)
	Unigene_510657	PER51	0.0226506	2.5166	normal	0.00267041	3.83477	up	Peroxidase	Peroxidase 51 OS=Arabidopsis thaliana OX=3702 GN=PER51 PE=2 SV=1	unnamed protein product [Triticum turgidum subsp. durum]	molecular function: catalytic activity (GO:0003824);; molecular function: antioxidant activity (GO:0016209);; biological process: metabolic process (GO:0008152);; biological process: cellular process (GO:0009987);; biological process: single-organism process (GO:0044699);; biological process: response to stimulus (GO:0050896);; biological process: detoxification (GO:0098754);; molecular function:…	Phenylpropanoid biosynthesis (ko00940)
	Unigene_007010	PER52	4.28089e-05	2.58402	up	0.000184988	4.55787	up	Peroxidase	Peroxidase 52 OS=Arabidopsis thaliana OX=3702 GN=PER52 PE=2 SV=1	peroxidase P7-like [Aegilops tauschii subsp. tauschii]	molecular function: catalytic activity (GO:0003824);; molecular function: antioxidant activity (GO:0016209);; biological process: metabolic process (GO:0008152);; biological process: cellular process (GO:0009987);; biological process: single-organism process (GO:0044699);; biological process: response to stimulus (GO:0050896);; biological process: detoxification (GO:0098754);; molecular function:…	Phenylpropanoid biosynthesis (ko00940)
	Unigene_179098	PER70	0.0178426	2.17403	normal	7.98298e-05	4.54391	up	Peroxidase	Peroxidase 70 OS=Zea mays OX=4577 GN=PER70 PE=1 SV=1	hypothetical protein CFC21_091210 [Triticum aestivum]	molecular function: catalytic activity (GO:0003824);; molecular function: antioxidant activity (GO:0016209);; biological process: metabolic process (GO:0008152);; biological process: cellular process (GO:0009987);; biological process: single-organism process (GO:0044699);; biological process: response to stimulus (GO:0050896);; biological process: detoxification (GO:0098754);; molecular function:…	Phenylpropanoid biosynthesis (ko00940)
	Unigene_563733	PER70	1.45562e-05	3.64668	up	0.000334124	4.71931	up	Peroxidase	Peroxidase 70 OS=Zea mays OX=4577 GN=PER70 PE=1 SV=1	peroxidase 2-like [Aegilops tauschii subsp. tauschii]	molecular function: catalytic activity (GO:0003824);; molecular function: antioxidant activity (GO:0016209);; biological process: metabolic process (GO:0008152);; biological process: cellular process (GO:0009987);; biological process: single-organism process (GO:0044699);; biological process: response to stimulus (GO:0050896);; biological process: detoxification (GO:0098754);; molecular function:…	Phenylpropanoid biosynthesis (ko00940)
	Unigene_194168	PER72	0.00660686	2.20358	up	0.0406077	2.4316	normal	Peroxidase	Peroxidase 72 OS=Arabidopsis thaliana OX=3702 GN=PER72 PE=1 SV=1	peroxidase 72-like [Aegilops tauschii subsp. tauschii]	molecular function: catalytic activity (GO:0003824);; molecular function: antioxidant activity (GO:0016209);; biological process: metabolic process (GO:0008152);; biological process: cellular process (GO:0009987);; biological process: single-organism process (GO:0044699);; biological process: response to stimulus (GO:0050896);; biological process: detoxification (GO:0098754);; molecular function:…	Phenylpropanoid biosynthesis (ko00940)
	Unigene_177847	PER9	0.00553968	1.57958	up	0.0625847	1.74812	normal	Peroxidase	Peroxidase 9 OS=Arabidopsis thaliana OX=3702 GN=PER9 PE=1 SV=1	hypothetical protein CFC21_035054 [Triticum aestivum]	molecular function: catalytic activity (GO:0003824);; molecular function: antioxidant activity (GO:0016209);; biological process: metabolic process (GO:0008152);; biological process: cellular process (GO:0009987);; biological process: single-organism process (GO:0044699);; biological process: response to stimulus (GO:0050896);; biological process: detoxification (GO:0098754);; molecular function:…	Phenylpropanoid biosynthesis (ko00940)
	Unigene_185249	pod	4.84667e-06	3.135	up	0.00177259	3.09379	up	Peroxidase	Peroxidase 15 OS=Ipomoea batatas OX=4120 GN=pod PE=1 SV=1	--	molecular function: catalytic activity (GO:0003824);; molecular function: antioxidant activity (GO:0016209);; biological process: metabolic process (GO:0008152);; biological process: cellular process (GO:0009987);; biological process: single-organism process (GO:0044699);; biological process: response to stimulus (GO:0050896);; biological process: detoxification (GO:0098754);; molecular function:…	Phenylpropanoid biosynthesis (ko00940)
	Unigene_578636	pod	--	--	--	4.26637e-05	5.96793	up	Peroxidase	Peroxidase 15 OS=Ipomoea batatas OX=4120 GN=pod PE=1 SV=1	hypothetical protein CFC21_049268 [Triticum aestivum]	molecular function: catalytic activity (GO:0003824);; molecular function: antioxidant activity (GO:0016209);; biological process: metabolic process (GO:0008152);; biological process: cellular process (GO:0009987);; biological process: single-organism process (GO:0044699);; biological process: response to stimulus (GO:0050896);; biological process: detoxification (GO:0098754);; molecular function:…	Phenylpropanoid biosynthesis (ko00940)
	Unigene_184872	PRX112	0.00117451	3.05102	up	0.0628408	2.25103	normal	Peroxidase	Peroxidase 2 OS=Oryza sativa subsp. indica OX=39946 GN=PRX112 PE=3 SV=2	--	molecular function: catalytic activity (GO:0003824);; molecular function: antioxidant activity (GO:0016209);; biological process: metabolic process (GO:0008152);; biological process: cellular process (GO:0009987);; biological process: single-organism process (GO:0044699);; biological process: response to stimulus (GO:0050896);; biological process: detoxification (GO:0098754);; molecular function:…	Phenylpropanoid biosynthesis (ko00940)
	Unigene_020145	PRX112	0.00249915	2.36449	up	0.000103197	5.08682	up	Peroxidase	Peroxidase 2 OS=Oryza sativa subsp. japonica OX=39947 GN=PRX112 PE=2 SV=1	Peroxidase 4 [Hordeum vulgare]	molecular function: catalytic activity (GO:0003824);; molecular function: antioxidant activity (GO:0016209);; biological process: metabolic process (GO:0008152);; biological process: cellular process (GO:0009987);; biological process: single-organism process (GO:0044699);; biological process: response to stimulus (GO:0050896);; biological process: detoxification (GO:0098754);; molecular function:…	Phenylpropanoid biosynthesis (ko00940)
	Unigene_192845	PRX74	0.000306415	3.26103	up	0.00511433	3.0958	up	Peroxidase	Peroxidase 1 OS=Oryza sativa subsp. japonica OX=39947 GN=PRX74 PE=2 SV=2	class III peroxidase [Hordeum vulgare]	molecular function: catalytic activity (GO:0003824);; molecular function: antioxidant activity (GO:0016209);; biological process: metabolic process (GO:0008152);; biological process: cellular process (GO:0009987);; biological process: single-organism process (GO:0044699);; biological process: response to stimulus (GO:0050896);; biological process: detoxification (GO:0098754);; cellular component:…	Phenylpropanoid biosynthesis (ko00940)
	Unigene_318616	PRX74	9.61954e-09	5.12658	up	3.26246e-05	4.62122	up	Peroxidase	Peroxidase 1 OS=Oryza sativa subsp. japonica OX=39947 GN=PRX74 PE=2 SV=2	Peroxidase 1 [Triticum urartu]	molecular function: catalytic activity (GO:0003824);; molecular function: antioxidant activity (GO:0016209);; biological process: metabolic process (GO:0008152);; biological process: cellular process (GO:0009987);; biological process: single-organism process (GO:0044699);; biological process: response to stimulus (GO:0050896);; biological process: detoxification (GO:0098754);; molecular function:…	Phenylpropanoid biosynthesis (ko00940)
Glutathione S-transferase (GST)	Unigene_035217	TCHQD	--	--	--	1.4864e-05	6.29034	up	Glutathione S-transferase, N-terminal domain;; Glutathione S-transferase, N-terminal domain;; Glutathione S-transferase, N-terminal domain;; Glutathione S-transferase, C-terminal domain	Glutathione S-transferase TCHQD OS=Arabidopsis thaliana OX=3702 GN=TCHQD PE=2 SV=1	Tetrachloro-P-hydroquinone reductive dehalogenase [Hordeum vulgare]	molecular function: catalytic activity (GO:0003824);; molecular function: binding (GO:0005488);; cellular component: cell (GO:0005623);; cellular component: cell part (GO:0044464);; cellular component: membrane (GO:0016020);; biological process: metabolic process (GO:0008152);; biological process: cellular process (GO:0009987)	--
	Unigene_595807	DHAR1	0.0543278	2.76413	normal	0.00190833	4.44444	up	Glutathione S-transferase, N-terminal domain;; Glutathione S-transferase, N-terminal domain;; Glutathione S-transferase, N-terminal domain;; Glutathione S-transferase, C-terminal domain	Probable glutathione S-transferase DHAR1, cytosolic OS=Oryza sativa subsp. japonica OX=39947 GN=DHAR1 PE=1 SV=1	--	biological process: response to stimulus (GO:0050896);; molecular function: catalytic activity (GO:0003824);; molecular function: binding (GO:0005488);; cellular component: extracellular region (GO:0005576);; cellular component: cell (GO:0005623);; cellular component: cell part (GO:0044464);; cellular component: organelle (GO:0043226);; cellular component: membrane (GO:0016020);; biological proce…	Ascorbate and aldarate metabolism (ko00053);; Glutathione metabolism (ko00480)
	Unigene_502298	GST1	0.090938	2.36766	normal	0.000552513	4.87578	up	Glutathione S-transferase, C-terminal domain;; Glutathione S-transferase, C-terminal domain;; Glutathione S-transferase, C-terminal domain;; Glutathione S-transferase, N-terminal domain;; Glutathione S-transferase, N-terminal domain;; Glutathione S-transferase, N-terminal domain	Glutathione S-transferase 1 OS=Zea mays OX=4577 GN=GST1 PE=1 SV=4	unnamed protein product [Triticum turgidum subsp. durum]	molecular function: binding (GO:0005488)	Glutathione metabolism (ko00480)
	Unigene_523023	GSTA2	0.227817	1.96269	normal	0.00215781	4.5786	up	Glutathione S-transferase, C-terminal domain;; Glutathione S-transferase, C-terminal domain;; Glutathione S-transferase, C-terminal domain;; Glutathione S-transferase, N-terminal domain;; Glutathione S-transferase, N-terminal domain	Glutathione S-transferase 2 OS=Triticum aestivum OX=4565 GN=GSTA2 PE=3 SV=1	RecName: Full=Glutathione S-transferase 2; AltName: Full=GST class-phi [Triticum aestivum]	molecular function: binding (GO:0005488)	Glutathione metabolism (ko00480)
	Unigene_508439	GSTF1	0.118719	2.12234	normal	0.00345559	3.90131	up	Glutathione S-transferase, C-terminal domain;; Glutathione S-transferase, C-terminal domain;; Glutathione S-transferase, C-terminal domain	Probable glutathione S-transferase GSTF1 OS=Oryza sativa subsp. japonica OX=39947 GN=GSTF1 PE=1 SV=2	glutathione transferase [Alopecurus myosuroides]	--	Glutathione metabolism (ko00480)
	Unigene_585318	GSTT1	0.0585113	2.24774	normal	0.00332651	3.67178	up	Glutathione S-transferase, N-terminal domain;; Glutathione S-transferase, N-terminal domain;; Glutathione S-transferase, N-terminal domain	Glutathione S-transferase T1 OS=Arabidopsis thaliana OX=3702 GN=GSTT1 PE=2 SV=1	glutathione S-transferase T1 [Brachypodium distachyon]	molecular function: catalytic activity (GO:0003824);; molecular function: binding (GO:0005488);; cellular component: cell (GO:0005623);; cellular component: cell part (GO:0044464);; cellular component: organelle (GO:0043226);; biological process: metabolic process (GO:0008152);; biological process: cellular process (GO:0009987);; biological process: single-organism process (GO:0044699);; biologic…	Glutathione metabolism (ko00480)
	Unigene_528334	GSTU15	0.399038	1.32226	normal	0.00063526	4.77802	up	Glutathione S-transferase, C-terminal domain;; Glutathione S-transferase, C-terminal domain	Glutathione S-transferase U15 OS=Arabidopsis thaliana OX=3702 GN=GSTU15 PE=2 SV=1	glutathione transferase [Alopecurus myosuroides]	--	Glutathione metabolism (ko00480)
	Unigene_301194	GSTU6	0.00501905	-2.38429	down	0.0968993	-1.97499	normal	Glutathione S-transferase, C-terminal domain	Probable glutathione S-transferase GSTU6 OS=Oryza sativa subsp. japonica OX=39947 GN=GSTU6 PE=2 SV=2	putative glutathione S-transferase GSTU6 [Dichanthelium oligosanthes]	--	Glutathione metabolism (ko00480)
	Unigene_310667	GSTU6	0.0017297	2.15909	up	0.839182	0.42676	normal	Glutathione S-transferase, N-terminal domain;; Glutathione S-transferase, N-terminal domain;; Glutathione S-transferase, C-terminal domain	Probable glutathione S-transferase GSTU6 OS=Oryza sativa subsp. japonica OX=39947 GN=GSTU6 PE=2 SV=2	probable glutathione S-transferase GSTU6 [Aegilops tauschii subsp. tauschii]	molecular function: binding (GO:0005488)	Glutathione metabolism (ko00480)
	Unigene_596055	GSTU6	0.329052	-0.987213	normal	0.00569439	-2.98657	down	Glutathione S-transferase, N-terminal domain;; Glutathione S-transferase, N-terminal domain;; Glutathione S-transferase, N-terminal domain;; Glutathione S-transferase, C-terminal domain	Probable glutathione S-transferase GSTU6 OS=Oryza sativa subsp. japonica OX=39947 GN=GSTU6 PE=2 SV=2	unnamed protein product [Triticum turgidum subsp. durum]	molecular function: binding (GO:0005488)	Glutathione metabolism (ko00480)
	Unigene_478573	GSTU8	--	--	--	3.33286e-05	6.1783	up	Glutathione S-transferase, C-terminal domain	Glutathione S-transferase U8 OS=Arabidopsis thaliana OX=3702 GN=GSTU8 PE=2 SV=1	unnamed protein product [Triticum turgidum subsp. durum]	--	Glutathione metabolism (ko00480)
	Unigene_428972	Mgst3	6.46494e-05	-5.74719	down	0.589163	-1.76213	normal	MAPEG family	Microsomal glutathione S-transferase 3 OS=Mus musculus OX=10090 GN=Mgst3 PE=1 SV=1	hypothetical protein CC1G_01788 [Coprinopsis cinerea okayama7#130]	--	Glutathione metabolism (ko00480)
Monodehydroascorbate reductase (MDAR)	Unigene_525988	MDAR5	0.0477728	2.84545	normal	0.00818011	3.69197	up	Pyridine nucleotide-disulphide oxidoreductase;; Pyridine nucleotide-disulphide oxidoreductase;; Pyridine nucleotide-disulphide oxidoreductase;; FAD binding domain	Monodehydroascorbate reductase 5, chlorplastic OS=Oryza sativa subsp. japonica OX=39947 GN=MDAR5 PE=2 SV=2	putative monodehydroascorbate reductase [Lolium arundinaceum]	molecular function: binding (GO:0005488);; cellular component: cell (GO:0005623);; cellular component: cell part (GO:0044464);; cellular component: organelle (GO:0043226);; biological process: response to stimulus (GO:0050896);; cellular component: organelle part (GO:0044422);; molecular function: catalytic activity (GO:0003824);; biological process: metabolic process (GO:0008152);; biological pr…	Ascorbate and aldarate metabolism (ko00053)
Glutathione reductase (GR)	Unigene_602539	GRC2	0.0323814	3.21388	normal	0.00100619	4.59602	up	Pyridine nucleotide-disulphide oxidoreductase;; Pyridine nucleotide-disulphide oxidoreductase, dimerisation domain;; Pyridine nucleotide-disulphide oxidoreductase;; Pyridine nucleotide-disulphide oxidoreductase;; Glycosyltransferase family 29 (sialyltransferase)	Glutathione reductase, cytosolic OS=Oryza sativa subsp. japonica OX=39947 GN=GRC2 PE=2 SV=2	cytosolic glutathione reductase [Hordeum vulgare]	biological process: response to stimulus (GO:0050896);; molecular function: catalytic activity (GO:0003824);; molecular function: antioxidant activity (GO:0016209);; biological process: metabolic process (GO:0008152);; biological process: cellular process (GO:0009987);; biological process: single-organism process (GO:0044699);; biological process: detoxification (GO:0098754);; cellular component:…	Glutathione metabolism (ko00480)
Glutathione peroxidase (GPX)	Unigene_589734	GPX4	0.0497824	2.67017	normal	0.0040257	4.15976	up	Glutathione peroxidase;; AhpC/TSA family	Probable glutathione peroxidase 4 OS=Arabidopsis thaliana OX=3702 GN=GPX4 PE=2 SV=1	hypothetical protein CFC21_057475 [Triticum aestivum]	biological process: reproduction (GO:0000003);; biological process: reproductive process (GO:0022414);; biological process: developmental process (GO:0032502);; molecular function: catalytic activity (GO:0003824);; molecular function: antioxidant activity (GO:0016209);; biological process: metabolic process (GO:0008152);; biological process: cellular process (GO:0009987);; biological process: sin…	Glutathione metabolism (ko00480);; Arachidonic acid metabolism (ko00590)
	Unigene_175788	GPX6	0.00268156	-1.20978	down	0.773446	-0.424038	normal	--	Probable phospholipid hydroperoxide glutathione peroxidase 6, mitochondrial OS=Arabidopsis thaliana OX=3702 GN=GPX6 PE=2 SV=2	putative phospholipid hydroperoxide glutathione peroxidase 6, mitochondrial [Zea mays]	molecular function: catalytic activity (GO:0003824);; molecular function: antioxidant activity (GO:0016209);; biological process: metabolic process (GO:0008152);; biological process: cellular process (GO:0009987);; biological process: single-organism process (GO:0044699);; biological process: response to stimulus (GO:0050896);; biological process: detoxification (GO:0098754)	Glutathione metabolism (ko00480);; Arachidonic acid metabolism (ko00590)
Ascorbate peroxidase (APX)	Unigene_192767	APX8	0.0483158	3.02406	normal	0.000699963	4.86481	up	Peroxidase	Probable L-ascorbate peroxidase 8, chloroplastic OS=Oryza sativa subsp. japonica OX=39947 GN=APX8 PE=1 SV=2	probable L-ascorbate peroxidase 8, chloroplastic isoform X2 [Aegilops tauschii subsp. tauschii]	biological process: response to stimulus (GO:0050896);; molecular function: catalytic activity (GO:0003824);; molecular function: antioxidant activity (GO:0016209);; biological process: metabolic process (GO:0008152);; biological process: cellular process (GO:0009987);; biological process: single-organism process (GO:0044699);; biological process: detoxification (GO:0098754);; cellular component:…	Ascorbate and aldarate metabolism (ko00053);; Glutathione metabolism (ko00480)
	Unigene_556266	APX1	0.056596	2.20731	normal	0.00433292	3.71618	up	Peroxidase	L-ascorbate peroxidase 1, cytosolic OS=Oryza sativa subsp. japonica OX=39947 GN=APX1 PE=1 SV=1	L-ascorbate peroxidase 1, cytosolic [Aegilops tauschii subsp. tauschii]	biological process: response to stimulus (GO:0050896);; molecular function: catalytic activity (GO:0003824);; molecular function: antioxidant activity (GO:0016209);; biological process: metabolic process (GO:0008152);; biological process: cellular process (GO:0009987);; biological process: single-organism process (GO:0044699);; biological process: detoxification (GO:0098754);; cellular component:…	Ascorbate and aldarate metabolism (ko00053);; Glutathione metabolism (ko00480)
Glutamate dehydrogenase(GDH)	Unigene_515717	GDH2	0.0469722	2.96511	normal	3.49399e-05	5.20991	up	Glutamate/Leucine/Phenylalanine/Valine dehydrogenase;; Glu/Leu/Phe/Val dehydrogenase, dimerisation domain;; Glutamate/Leucine/Phenylalanine/Valine dehydrogenase	Glutamate dehydrogenase 2, mitochondrial OS=Oryza sativa subsp. indica OX=39946 GN=GDH2 PE=3 SV=1	unnamed protein product [Triticum turgidum subsp. durum]	biological process: metabolic process (GO:0008152);; biological process: cellular process (GO:0009987);; biological process: single-organism process (GO:0044699);; molecular function: catalytic activity (GO:0003824)	Arginine biosynthesis (ko00220);; Alanine, aspartate and glutamate metabolism (ko00250);; Nitrogen metabolism (ko00910);; Carbon metabolism (ko01200)
	Unigene_529364	gdhA	0.0441069	2.99294	normal	0.0032957	4.24926	up	Glu/Leu/Phe/Val dehydrogenase, dimerisation domain;; Glutamate/Leucine/Phenylalanine/Valine dehydrogenase;; Glu/Leu/Phe/Val dehydrogenase, dimerisation domain;; RWD domain	NAD(P)-specific glutamate dehydrogenase OS=Prevotella ruminicola OX=839 GN=gdhA PE=1 SV=1	NADP-specific glutamate dehydrogenase isoform X1 [Aegilops tauschii subsp. tauschii]	molecular function: catalytic activity (GO:0003824);; biological process: metabolic process (GO:0008152);; biological process: single-organism process (GO:0044699);; molecular function: binding (GO:0005488);; cellular component: cell (GO:0005623);; cellular component: cell part (GO:0044464);; biological process: cellular process (GO:0009987)	Arginine biosynthesis (ko00220);; Alanine, aspartate and glutamate metabolism (ko00250);; Nitrogen metabolism (ko00910)
	Unigene_042374	GDH1	0.0537497	2.5562	normal	0.000137332	5.23933	up	Glutamate/Leucine/Phenylalanine/Valine dehydrogenase;; Glu/Leu/Phe/Val dehydrogenase, dimerisation domain	Glutamate dehydrogenase 1, mitochondrial OS=Oryza sativa subsp. indica OX=39946 GN=GDH1 PE=3 SV=2	unnamed protein product [Triticum turgidum subsp. durum]	molecular function: binding (GO:0005488);; molecular function: catalytic activity (GO:0003824);; biological process: metabolic process (GO:0008152);; biological process: single-organism process (GO:0044699);; cellular component: cell (GO:0005623);; cellular component: cell part (GO:0044464);; cellular component: organelle (GO:0043226);; biological process: cellular process (GO:0009987);; biologic…	Arginine biosynthesis (ko00220);; Alanine, aspartate and glutamate metabolism (ko00250);; Nitrogen metabolism (ko00910);; Carbon metabolism (ko01200)
Glutathione synthetase (GSH)	Unigene_194162	GILP	0.0741337	2.41724	normal	0.00207605	4.25173	up	--	GSH-induced LITAF domain protein OS=Arabidopsis thaliana OX=3702 GN=GILP PE=1 SV=1	unnamed protein product [Triticum turgidum subsp. durum]	biological process: biological regulation (GO:0065007);; cellular component: cell (GO:0005623);; cellular component: membrane (GO:0016020);; cellular component: cell part (GO:0044464)	--
	Unigene_600305	GSH2	0.0598451	2.33057	normal	0.00174995	4.50701	up	Eukaryotic glutathione synthase, ATP binding domain;; Eukaryotic glutathione synthase	Glutathione synthetase, chloroplastic OS=Brassica juncea OX=3707 GN=GSH2 PE=2 SV=1	predicted protein [Hordeum vulgare subsp. vulgare]	molecular function: catalytic activity (GO:0003824);; biological process: metabolic process (GO:0008152);; biological process: cellular process (GO:0009987);; molecular function: binding (GO:0005488)	Cysteine and methionine metabolism (ko00270);; Glutathione metabolism (ko00480)
	Unigene_602201	GSH1-1	0.0628364	2.9565	normal	0.00066391	4.93743	up	Glutamate-cysteine ligase family 2(GCS2)	Glutamate--cysteine ligase A, chloroplastic OS=Oryza sativa subsp. indica OX=39946 GN=GSH1-1 PE=2 SV=2	unnamed protein product [Triticum turgidum subsp. durum]	biological process: reproduction (GO:0000003);; biological process: response to stimulus (GO:0050896);; biological process: immune system process (GO:0002376);; biological process: reproductive process (GO:0022414);; biological process: developmental process (GO:0032502);; molecular function: catalytic activity (GO:0003824);; cellular component: cell (GO:0005623);; cellular component: cell part (…	Cysteine and methionine metabolism (ko00270);; Glutathione metabolism (ko00480)
Respiratory burst oxidase (RBOH)	Unigene_529864	RBOHA	0.0948761	2.21687	normal	0.00696822	3.72202	up	Ferric reductase NAD binding domain;; FAD-binding domain;; Ferric reductase like transmembrane component	Respiratory burst oxidase homolog protein A OS=Solanum tuberosum OX=4113 GN=RBOHA PE=1 SV=1	hypothetical protein GQ55_5G169500 [Panicum hallii var. hallii]	molecular function: catalytic activity (GO:0003824);; biological process: metabolic process (GO:0008152);; biological process: single-organism process (GO:0044699)	MAPK signaling pathway - plant (ko04016);; Plant-pathogen interaction (ko04626)
	Unigene_602634	RBOHC	0.106155	2.49509	normal	0.00193169	4.27972	up	Respiratory burst NADPH oxidase;; Ferric reductase like transmembrane component;; EF-hand domain pair;; EF hand	Respiratory burst oxidase homolog protein C OS=Solanum tuberosum OX=4113 GN=RBOHC PE=1 SV=2	respiratory burst oxidase homolog protein B [Brachypodium distachyon]	molecular function: catalytic activity (GO:0003824);; molecular function: antioxidant activity (GO:0016209);; biological process: metabolic process (GO:0008152);; biological process: cellular process (GO:0009987);; biological process: single-organism process (GO:0044699);; biological process: response to stimulus (GO:0050896);; biological process: detoxification (GO:0098754)	MAPK signaling pathway - plant (ko04016);; Plant-pathogen interaction (ko04626)
	Unigene_511061	RBOHC	0.0411696	3.27467	normal	2.77729e-05	6.18188	up	Respiratory burst NADPH oxidase	Respiratory burst oxidase homolog protein C OS=Solanum tuberosum OX=4113 GN=RBOHC PE=1 SV=2	respiratory burst oxidase homolog protein B-like [Aegilops tauschii subsp. tauschii]	molecular function: catalytic activity (GO:0003824);; molecular function: antioxidant activity (GO:0016209);; biological process: metabolic process (GO:0008152);; biological process: cellular process (GO:0009987);; biological process: single-organism process (GO:0044699);; biological process: response to stimulus (GO:0050896);; biological process: detoxification (GO:0098754)	MAPK signaling pathway - plant (ko04016);; Plant-pathogen interaction (ko04626)
	Unigene_528046	RBOHF	0.123067	1.8451	normal	0.00692969	3.48631	up	Ferric reductase NAD binding domain;; Respiratory burst NADPH oxidase;; FAD-binding domain;; Ferric reductase like transmembrane component;; EF-hand domain pair	Respiratory burst oxidase homolog protein F OS=Arabidopsis thaliana OX=3702 GN=RBOHF PE=1 SV=1	respiratory burst oxidase-like protein F2 [Hordeum vulgare subsp. vulgare]	molecular function: catalytic activity (GO:0003824);; molecular function: antioxidant activity (GO:0016209);; biological process: metabolic process (GO:0008152);; biological process: cellular process (GO:0009987);; biological process: single-organism process (GO:0044699);; biological process: response to stimulus (GO:0050896);; biological process: detoxification (GO:0098754)	MAPK signaling pathway - plant (ko04016);; Plant-pathogen interaction (ko04626)
Alternative oxidase (AOX)	Unigene_529610	NDC1	0.0155973	2.9688	normal	0.00158876	4.26129	up	alpha/beta hydrolase fold;; Pyridine nucleotide-disulphide oxidoreductase;; Pyridine nucleotide-disulphide oxidoreductase;; Carboxylesterase family;; FAD-NAD(P)-binding	Alternative NAD(P)H-ubiquinone oxidoreductase C1, chloroplastic/mitochondrial OS=Arabidopsis thaliana OX=3702 GN=NDC1 PE=1 SV=2	hypothetical protein CFC21_101734 [Triticum aestivum]	molecular function: catalytic activity (GO:0003824);; cellular component: cell (GO:0005623);; cellular component: cell part (GO:0044464);; cellular component: organelle (GO:0043226);; biological process: metabolic process (GO:0008152);; biological process: cellular process (GO:0009987);; biological process: single-organism process (GO:0044699);; biological process: response to stimulus (GO:005089…	Ubiquinone and other terpenoid-quinone biosynthesis (ko00130)
	Unigene_599489	NDA1	0.0359993	2.67673	normal	0.00300119	4.09978	up	Pyridine nucleotide-disulphide oxidoreductase;; Pyridine nucleotide-disulphide oxidoreductase	Internal alternative NAD(P)H-ubiquinone oxidoreductase A1, mitochondrial OS=Arabidopsis thaliana OX=3702 GN=NDA1 PE=2 SV=1	predicted protein [Hordeum vulgare subsp. vulgare]	molecular function: catalytic activity (GO:0003824);; biological process: metabolic process (GO:0008152);; biological process: single-organism process (GO:0044699);; cellular component: cell (GO:0005623);; cellular component: cell part (GO:0044464);; cellular component: organelle (GO:0043226);; cellular component: organelle part (GO:0044422);; cellular component: membrane (GO:0016020);; cellular …	--
	Unigene_603859	NDB2	0.0249414	3.37083	normal	0.00246464	4.14861	up	Pyridine nucleotide-disulphide oxidoreductase;; Pyridine nucleotide-disulphide oxidoreductase;; EF-hand domain;; EF hand	External alternative NAD(P)H-ubiquinone oxidoreductase B2, mitochondrial OS=Arabidopsis thaliana OX=3702 GN=NDB2 PE=1 SV=1	external alternative NAD(P)H-ubiquinone oxidoreductase B2, mitochondrial-like [Hordeum vulgare]	biological process: cellular process (GO:0009987);; biological process: developmental process (GO:0032502);; biological process: single-organism process (GO:0044699);; molecular function: catalytic activity (GO:0003824);; biological process: metabolic process (GO:0008152);; cellular component: cell (GO:0005623);; cellular component: cell part (GO:0044464);; cellular component: organelle (GO:00432…	--
Mitogen-activated protein kinase (MAPK)	Unigene_528834	MPK3	0.0612213	2.33974	normal	0.00235524	4.0476	up	Protein kinase domain;; Protein tyrosine and serine/threonine kinase;; Lipopolysaccharide kinase (Kdo/WaaP) family	Mitogen-activated protein kinase 8 OS=Oryza sativa subsp. japonica OX=39947 GN=MPK8 PE=2 SV=2	unnamed protein product [Triticum turgidum subsp. durum]	biological process: metabolic process (GO:0008152);; biological process: cellular process (GO:0009987);; biological process: signaling (GO:0023052);; biological process: single-organism process (GO:0044699);; biological process: response to stimulus (GO:0050896);; biological process: biological regulation (GO:0065007);; molecular function: catalytic activity (GO:0003824);; molecular function: sig…	--
	Unigene_603204	MPK5	0.0916256	2.12379	normal	0.0033515	4.02802	up	Protein kinase domain;; Protein tyrosine and serine/threonine kinase;; Lipopolysaccharide kinase (Kdo/WaaP) family	Mitogen-activated protein kinase 7 OS=Oryza sativa subsp. japonica OX=39947 GN=MPK7 PE=2 SV=1	mitogen-activated protein kinase 7 [Brachypodium distachyon]	biological process: metabolic process (GO:0008152);; biological process: cellular process (GO:0009987);; biological process: signaling (GO:0023052);; biological process: single-organism process (GO:0044699);; biological process: response to stimulus (GO:0050896);; biological process: biological regulation (GO:0065007);; molecular function: catalytic activity (GO:0003824);; molecular function: sig…	--
	Unigene_520035	MKK1	0.0705435	2.49636	normal	0.00226329	4.21159	up	Protein kinase domain;; Protein tyrosine and serine/threonine kinase;; Lipopolysaccharide kinase (Kdo/WaaP) family	Mitogen-activated protein kinase 3 OS=Oryza sativa subsp. japonica OX=39947 GN=MPK3 PE=2 SV=1	mitogen-activated protein kinase 3 [Aegilops tauschii subsp. tauschii]	biological process: metabolic process (GO:0008152);; biological process: cellular process (GO:0009987);; biological process: signaling (GO:0023052);; biological process: single-organism process (GO:0044699);; biological process: response to stimulus (GO:0050896);; biological process: biological regulation (GO:0065007);; molecular function: catalytic activity (GO:0003824);; molecular function: sig…	MAPK signaling pathway - plant (ko04016)
	Unigene_522601	MKK1	0.0700396	2.47225	normal	0.000769271	4.24091	up	Protein kinase domain;; Protein tyrosine and serine/threonine kinase;; Kinase-like	Mitogen-activated protein kinase kinase kinase 3 OS=Arabidopsis thaliana OX=3702 GN=MAPKKK3 PE=1 SV=1	unnamed protein product [Triticum turgidum subsp. durum]	biological process: metabolic process (GO:0008152);; biological process: cellular process (GO:0009987);; biological process: signaling (GO:0023052);; biological process: single-organism process (GO:0044699);; biological process: response to stimulus (GO:0050896);; biological process: biological regulation (GO:0065007);; molecular function: catalytic activity (GO:0003824);; molecular function: sig…	--
	Unigene_522866	MKK1	0.0863608	2.81981	normal	9.77102e-05	5.60462	up	Protein kinase domain;; Protein tyrosine and serine/threonine kinase	Mitogen-activated protein kinase 5 OS=Oryza sativa subsp. indica OX=39946 GN=MPK5 PE=1 SV=2	MAP KINASE [Avena sativa]	biological process: metabolic process (GO:0008152);; biological process: cellular process (GO:0009987);; biological process: signaling (GO:0023052);; biological process: single-organism process (GO:0044699);; biological process: response to stimulus (GO:0050896);; biological process: biological regulation (GO:0065007);; molecular function: catalytic activity (GO:0003824);; molecular function: sig…	MAPK signaling pathway - plant (ko04016);; Plant-pathogen interaction (ko04626)
	Unigene_524843	MKK1	0.0731284	2.95561	normal	0.000505152	4.98842	up	Protein kinase domain;; Protein tyrosine and serine/threonine kinase	Mitogen-activated protein kinase kinase 1 OS=Oryza sativa subsp. japonica OX=39947 GN=MKK1 PE=1 SV=1	unnamed protein product [Triticum turgidum subsp. durum]	biological process: reproduction (GO:0000003);; biological process: metabolic process (GO:0008152);; biological process: cellular process (GO:0009987);; biological process: signaling (GO:0023052);; biological process: single-organism process (GO:0044699);; biological process: response to stimulus (GO:0050896);; biological process: biological regulation (GO:0065007);; biological process: cellular …	Plant-pathogen interaction (ko04626)
	Unigene_525572	MKK1	0.0577479	2.75017	normal	0.00215823	4.25564	up	Protein kinase domain;; Protein tyrosine and serine/threonine kinase;; Kinase-like	Mitogen-activated protein kinase kinase kinase 1 OS=Arabidopsis thaliana OX=3702 GN=MEKK1 PE=1 SV=2	hypothetical protein CFC21_097437 [Triticum aestivum]	molecular function: catalytic activity (GO:0003824);; biological process: metabolic process (GO:0008152);; biological process: cellular process (GO:0009987);; molecular function: binding (GO:0005488)	MAPK signaling pathway - plant (ko04016);; Plant-pathogen interaction (ko04626)
	Unigene_526299	MKK2	0.0344755	3.21384	normal	0.000714241	4.64469	up	Protein kinase domain;; Protein tyrosine and serine/threonine kinase;; Fungal protein kinase	Mitogen-activated protein kinase kinase kinase 1 OS=Arabidopsis thaliana OX=3702 GN=MEKK1 PE=1 SV=2	mitogen-activated protein kinase kinase kinase 1-like [Aegilops tauschii subsp. tauschii]	molecular function: catalytic activity (GO:0003824);; biological process: metabolic process (GO:0008152);; biological process: cellular process (GO:0009987);; molecular function: binding (GO:0005488)	MAPK signaling pathway - plant (ko04016);; Plant-pathogen interaction (ko04626)
	Unigene_510194	MEKK1	--	--	--	3.7325e-06	6.78624	up	Protein kinase domain;; Protein tyrosine and serine/threonine kinase	Mitogen-activated protein kinase kinase kinase 18 OS=Arabidopsis thaliana OX=3702 GN=MAPKKK18 PE=1 SV=1	hypothetical protein CFC21_047712 [Triticum aestivum]	biological process: metabolic process (GO:0008152);; biological process: cellular process (GO:0009987);; biological process: signaling (GO:0023052);; biological process: single-organism process (GO:0044699);; biological process: response to stimulus (GO:0050896);; biological process: biological regulation (GO:0065007);; biological process: cellular component organization or biogenesis (GO:0071840…	MAPK signaling pathway - plant (ko04016)
	Unigene_036513	MAPKKK3	0.0087652	-1.12177	down	0.761238	-0.599161	normal	Protein kinase domain;; Protein tyrosine and serine/threonine kinase;; Kinase-like	Mitogen-activated protein kinase kinase kinase 1 OS=Arabidopsis thaliana OX=3702 GN=MEKK1 PE=1 SV=2	hypothetical protein CFC21_056372 [Triticum aestivum]	molecular function: catalytic activity (GO:0003824);; biological process: metabolic process (GO:0008152);; biological process: cellular process (GO:0009987);; molecular function: binding (GO:0005488)	MAPK signaling pathway - plant (ko04016);; Plant-pathogen interaction (ko04626)
	Unigene_024171	MAPKKK18	0.0319127	2.67904	normal	0.00553786	3.78633	up	Protein kinase domain;; Protein tyrosine and serine/threonine kinase;; Fungal protein kinase	Mitogen-activated protein kinase kinase 2 OS=Arabidopsis thaliana OX=3702 GN=MKK2 PE=1 SV=2	hypothetical protein BRADI_1g51000v3 [Brachypodium distachyon]	biological process: metabolic process (GO:0008152);; biological process: cellular process (GO:0009987);; biological process: signaling (GO:0023052);; biological process: single-organism process (GO:0044699);; biological process: response to stimulus (GO:0050896);; biological process: biological regulation (GO:0065007);; biological process: multi-organism process (GO:0051704);; biological process:…	MAPK signaling pathway - plant (ko04016)

## Sheet: Stems
Gene classification	ID	Gene name	S0_vs_S3_DESeq2_FDR	S0_vs_S3_DESeq2_log2FC	S0_vs_S3_regulated	S0_vs_S6_DESeq2_FDR	S0_vs_S6_DESeq2_log2FC	S0_vs_S6_regulated	Pfam_annotation	Swissprot_annotation	nr_annotation	GO_second_level_annotation	KEGG_pathway_annotation
Superoxide dismutase (SOD)	Unigene_066007	SODA.4	--	--	--	3.36377e-10	10.7835	up	Iron/manganese superoxide dismutases, alpha-hairpin domain;; Iron/manganese superoxide dismutases, C-terminal domain	Superoxide dismutase [Mn] 3.1, mitochondrial OS=Zea mays OX=4577 GN=SODA.4 PE=2 SV=1	hypothetical protein BRADI_2g30580v3 [Brachypodium distachyon]	biological process: response to stimulus (GO:0050896);; molecular function: catalytic activity (GO:0003824);; molecular function: antioxidant activity (GO:0016209);; biological process: metabolic process (GO:0008152);; biological process: cellular process (GO:0009987);; biological process: single-organism process (GO:0044699);; biological process: detoxification (GO:0098754);; molecular function:…	Peroxisome (ko04146)
	Unigene_066892	CCS	0.00110869	4.59813	up	0.0110538	3.90429	normal	Heavy-metal-associated domain;; Copper/zinc superoxide dismutase (SODC)	Copper chaperone for superoxide dismutase, chloroplastic OS=Oryza sativa subsp. japonica OX=39947 GN=CCS PE=2 SV=1	copper chaperone for superoxide dismutase, chloroplastic [Aegilops tauschii subsp. tauschii]	molecular function: binding (GO:0005488);; cellular component: cell (GO:0005623);; cellular component: cell part (GO:0044464);; biological process: metabolic process (GO:0008152);; biological process: cellular process (GO:0009987);; biological process: single-organism process (GO:0044699);; biological process: biological regulation (GO:0065007);; molecular function: molecular function regulator (…	Amyotrophic lateral sclerosis (ko05014)
	Unigene_190043	Os06g0115400	0.000251895	4.65298	up	0.0308305	2.85356	normal	Iron/manganese superoxide dismutases, alpha-hairpin domain;; Iron/manganese superoxide dismutases, C-terminal domain	Superoxide dismutase [Fe] 1, chloroplastic OS=Oryza sativa subsp. japonica OX=39947 GN=Os06g0115400 PE=2 SV=1	Superoxide dismutase [Hordeum vulgare]	biological process: response to stimulus (GO:0050896);; molecular function: catalytic activity (GO:0003824);; molecular function: antioxidant activity (GO:0016209);; biological process: metabolic process (GO:0008152);; biological process: cellular process (GO:0009987);; biological process: single-organism process (GO:0044699);; biological process: detoxification (GO:0098754);; cellular component:…	Peroxisome (ko04146)
	Unigene_190676	SODA.4	0.000388622	4.13476	up	0.00173886	3.57051	up	Iron/manganese superoxide dismutases, C-terminal domain;; Iron/manganese superoxide dismutases, alpha-hairpin domain	Superoxide dismutase [Mn] 3.1, mitochondrial OS=Zea mays OX=4577 GN=SODA.4 PE=2 SV=1	superoxide dismutase [Mn] 3.1, mitochondrial [Brachypodium distachyon]	biological process: response to stimulus (GO:0050896);; molecular function: catalytic activity (GO:0003824);; molecular function: antioxidant activity (GO:0016209);; biological process: metabolic process (GO:0008152);; biological process: cellular process (GO:0009987);; biological process: single-organism process (GO:0044699);; biological process: detoxification (GO:0098754);; molecular function:…	Peroxisome (ko04146)
	Unigene_191580	SODCC.3	--	--	--	7.78033e-10	7.97027	up	Copper/zinc superoxide dismutase (SODC)	Superoxide dismutase [Cu-Zn] 4A OS=Zea mays OX=4577 GN=SODCC.3 PE=2 SV=2	cytosolic copper zinc superoxide dismutase [Hordeum vulgare]	biological process: response to stimulus (GO:0050896);; molecular function: catalytic activity (GO:0003824);; molecular function: antioxidant activity (GO:0016209);; biological process: metabolic process (GO:0008152);; biological process: cellular process (GO:0009987);; biological process: single-organism process (GO:0044699);; biological process: detoxification (GO:0098754);; molecular function:…	Peroxisome (ko04146)
	Unigene_306550	SODCP	--	--	--	2.7484e-06	7.13284	up	Copper/zinc superoxide dismutase (SODC)	Superoxide dismutase [Cu-Zn], chloroplastic OS=Oryza sativa subsp. japonica OX=39947 GN=SODCP PE=1 SV=1	CuZnSOD [Puccinellia tenuiflora]	biological process: response to stimulus (GO:0050896);; molecular function: catalytic activity (GO:0003824);; molecular function: antioxidant activity (GO:0016209);; biological process: metabolic process (GO:0008152);; biological process: cellular process (GO:0009987);; biological process: single-organism process (GO:0044699);; biological process: detoxification (GO:0098754);; molecular function:…	Peroxisome (ko04146)
Catalase (CAT)	Unigene_179531	CAT1	--	--	--	1.01576e-07	8.05327	up	Catalase-related immune-responsive	Catalase-1 OS=Triticum aestivum OX=4565 GN=CAT1 PE=2 SV=1	hypothetical protein CFC21_063250 [Triticum aestivum]	biological process: response to stimulus (GO:0050896);; molecular function: catalytic activity (GO:0003824);; molecular function: antioxidant activity (GO:0016209);; biological process: metabolic process (GO:0008152);; biological process: cellular process (GO:0009987);; biological process: single-organism process (GO:0044699);; biological process: detoxification (GO:0098754);; cellular component:…	Tryptophan metabolism (ko00380);; Glyoxylate and dicarboxylate metabolism (ko00630);; Carbon metabolism (ko01200);; MAPK signaling pathway - plant (ko04016);; Peroxisome (ko04146)
	Unigene_600736	CAT1	0.00301104	3.27309	up	5.77528e-10	4.55359	up	Catalase;; Catalase-related immune-responsive	Catalase isozyme 1 OS=Hordeum vulgare OX=4513 GN=CAT1 PE=2 SV=1	catalase [Puccinellia chinampoensis]	biological process: response to stimulus (GO:0050896);; molecular function: catalytic activity (GO:0003824);; molecular function: antioxidant activity (GO:0016209);; biological process: metabolic process (GO:0008152);; biological process: cellular process (GO:0009987);; biological process: single-organism process (GO:0044699);; biological process: detoxification (GO:0098754);; molecular function:…	Tryptophan metabolism (ko00380);; Glyoxylate and dicarboxylate metabolism (ko00630);; Carbon metabolism (ko01200);; MAPK signaling pathway - plant (ko04016);; Peroxisome (ko04146)
Peroxidases (POD)	Unigene_525107	APX7	0.00546922	3.70093	up	0.0181956	3.15906	normal	Peroxidase	Probable L-ascorbate peroxidase 7, chloroplastic OS=Oryza sativa subsp. japonica OX=39947 GN=APX7 PE=2 SV=1	hypothetical protein CFC21_023810 [Triticum aestivum]	biological process: response to stimulus (GO:0050896);; molecular function: catalytic activity (GO:0003824);; molecular function: antioxidant activity (GO:0016209);; biological process: metabolic process (GO:0008152);; biological process: cellular process (GO:0009987);; biological process: single-organism process (GO:0044699);; biological process: detoxification (GO:0098754);; cellular component:…	Ascorbate and aldarate metabolism (ko00053);; Glutathione metabolism (ko00480)
	Unigene_185172	——	0.000824627	-4.56359	down	0.00175831	-4.29602	down	Peroxidase	Peroxidase 2 (Fragment) OS=Hordeum vulgare OX=4513 PE=2 SV=1	--	molecular function: catalytic activity (GO:0003824);; molecular function: antioxidant activity (GO:0016209);; biological process: metabolic process (GO:0008152);; biological process: cellular process (GO:0009987);; biological process: single-organism process (GO:0044699);; biological process: response to stimulus (GO:0050896);; biological process: detoxification (GO:0098754);; molecular function:…	Phenylpropanoid biosynthesis (ko00940)
	Unigene_073730	OCP3	--	--	--	5.66287e-07	8.94667	up	Homeodomain	Protein OVEREXPRESSOR OF CATIONIC PEROXIDASE 3 OS=Arabidopsis thaliana OX=3702 GN=OCP3 PE=1 SV=1	hypothetical protein CFC21_103656 [Triticum aestivum]	biological process: response to stimulus (GO:0050896);; biological process: multi-organism process (GO:0051704);; biological process: immune system process (GO:0002376);; molecular function: binding (GO:0005488);; molecular function: nucleic acid binding transcription factor activity (GO:0001071);; biological process: biological regulation (GO:0065007);; cellular component: cell (GO:0005623);; ce…	--
	Unigene_524386	PER2	--	--	--	4.97831e-12	10.5092	up	Peroxidase	Peroxidase 2 OS=Zea mays OX=4577 GN=PER2 PE=2 SV=1	hypothetical protein OsI_18348 [Oryza sativa Indica Group]	molecular function: catalytic activity (GO:0003824);; molecular function: antioxidant activity (GO:0016209);; biological process: metabolic process (GO:0008152);; biological process: cellular process (GO:0009987);; biological process: single-organism process (GO:0044699);; biological process: response to stimulus (GO:0050896);; biological process: detoxification (GO:0098754);; molecular function:…	Phenylpropanoid biosynthesis (ko00940)
	Unigene_603649	PER21	5.17577e-06	6.00811	up	0.000145071	5.42046	up	Peroxidase	Peroxidase 21 OS=Arabidopsis thaliana OX=3702 GN=PER21 PE=1 SV=1	hypothetical protein CFC21_021495 [Triticum aestivum]	molecular function: catalytic activity (GO:0003824);; molecular function: antioxidant activity (GO:0016209);; biological process: metabolic process (GO:0008152);; biological process: cellular process (GO:0009987);; biological process: single-organism process (GO:0044699);; biological process: response to stimulus (GO:0050896);; biological process: detoxification (GO:0098754);; cellular component:…	Phenylpropanoid biosynthesis (ko00940)
	Unigene_599831	PER24	0.000474151	5.33574	up	0.0195746	3.89231	normal	Peroxidase	Peroxidase 24 OS=Arabidopsis thaliana OX=3702 GN=PER24 PE=2 SV=1	peroxidase 24-like [Aegilops tauschii subsp. tauschii]	biological process: response to stimulus (GO:0050896);; molecular function: catalytic activity (GO:0003824);; molecular function: antioxidant activity (GO:0016209);; biological process: metabolic process (GO:0008152);; biological process: cellular process (GO:0009987);; biological process: single-organism process (GO:0044699);; biological process: detoxification (GO:0098754);; cellular component:…	Phenylpropanoid biosynthesis (ko00940)
	Unigene_005678	PER25	0.00117343	4.35819	up	0.0143371	3.61337	normal	Peroxidase	Peroxidase 25 OS=Arabidopsis thaliana OX=3702 GN=PER25 PE=2 SV=2	hypothetical protein CFC21_034572 [Triticum aestivum]	molecular function: catalytic activity (GO:0003824);; molecular function: antioxidant activity (GO:0016209);; biological process: metabolic process (GO:0008152);; biological process: cellular process (GO:0009987);; biological process: single-organism process (GO:0044699);; biological process: response to stimulus (GO:0050896);; biological process: detoxification (GO:0098754);; cellular component:…	Phenylpropanoid biosynthesis (ko00940)
	Unigene_510657	PER51	0.0366709	-3.29559	normal	0.00416122	-3.6444	down	Peroxidase	Peroxidase 51 OS=Arabidopsis thaliana OX=3702 GN=PER51 PE=2 SV=1	unnamed protein product [Triticum turgidum subsp. durum]	molecular function: catalytic activity (GO:0003824);; molecular function: antioxidant activity (GO:0016209);; biological process: metabolic process (GO:0008152);; biological process: cellular process (GO:0009987);; biological process: single-organism process (GO:0044699);; biological process: response to stimulus (GO:0050896);; biological process: detoxification (GO:0098754);; molecular function:…	Phenylpropanoid biosynthesis (ko00940)
	Unigene_007010	PER52	0.00502492	-3.32419	down	0.0328863	-2.80513	normal	Peroxidase	Peroxidase 52 OS=Arabidopsis thaliana OX=3702 GN=PER52 PE=2 SV=1	peroxidase P7-like [Aegilops tauschii subsp. tauschii]	molecular function: catalytic activity (GO:0003824);; molecular function: antioxidant activity (GO:0016209);; biological process: metabolic process (GO:0008152);; biological process: cellular process (GO:0009987);; biological process: single-organism process (GO:0044699);; biological process: response to stimulus (GO:0050896);; biological process: detoxification (GO:0098754);; molecular function:…	Phenylpropanoid biosynthesis (ko00940)
	Unigene_521452	PER52	2.40396e-06	-5.27648	down	0.0048984	-4.12388	down	Peroxidase	Peroxidase 52 OS=Arabidopsis thaliana OX=3702 GN=PER52 PE=2 SV=1	hypothetical protein CFC21_110180 [Triticum aestivum]	molecular function: catalytic activity (GO:0003824);; molecular function: antioxidant activity (GO:0016209);; biological process: metabolic process (GO:0008152);; biological process: cellular process (GO:0009987);; biological process: single-organism process (GO:0044699);; biological process: response to stimulus (GO:0050896);; biological process: detoxification (GO:0098754);; molecular function:…	Phenylpropanoid biosynthesis (ko00940)
	Unigene_179098	PER70	0.0363825	-3.32025	normal	0.000272504	-4.46976	down	Peroxidase	Peroxidase 70 OS=Zea mays OX=4577 GN=PER70 PE=1 SV=1	hypothetical protein CFC21_091210 [Triticum aestivum]	molecular function: catalytic activity (GO:0003824);; molecular function: antioxidant activity (GO:0016209);; biological process: metabolic process (GO:0008152);; biological process: cellular process (GO:0009987);; biological process: single-organism process (GO:0044699);; biological process: response to stimulus (GO:0050896);; biological process: detoxification (GO:0098754);; molecular function:…	Phenylpropanoid biosynthesis (ko00940)
	Unigene_582449	PER72	--	--	--	1.14609e-06	8.50093	up	Peroxidase	Peroxidase 72 OS=Arabidopsis thaliana OX=3702 GN=PER72 PE=1 SV=1	peroxidase 72 [Brachypodium distachyon]	biological process: reproduction (GO:0000003);; biological process: reproductive process (GO:0022414);; biological process: developmental process (GO:0032502);; molecular function: catalytic activity (GO:0003824);; molecular function: antioxidant activity (GO:0016209);; biological process: metabolic process (GO:0008152);; biological process: cellular process (GO:0009987);; biological process: sin…	Phenylpropanoid biosynthesis (ko00940)
	Unigene_177592	pod	--	--	--	6.08713e-10	9.41272	up	Peroxidase	Peroxidase 15 OS=Ipomoea batatas OX=4120 GN=pod PE=1 SV=1	unnamed protein product [Triticum turgidum subsp. durum]	molecular function: catalytic activity (GO:0003824);; molecular function: antioxidant activity (GO:0016209);; biological process: metabolic process (GO:0008152);; biological process: cellular process (GO:0009987);; biological process: single-organism process (GO:0044699);; biological process: response to stimulus (GO:0050896);; biological process: detoxification (GO:0098754);; molecular function:…	Phenylpropanoid biosynthesis (ko00940)
	Unigene_020145	PRX112	0.0124685	-3.14464	normal	1.97576e-06	-6.42439	down	Peroxidase	Peroxidase 2 OS=Oryza sativa subsp. japonica OX=39947 GN=PRX112 PE=2 SV=1	Peroxidase 4 [Hordeum vulgare]	molecular function: catalytic activity (GO:0003824);; molecular function: antioxidant activity (GO:0016209);; biological process: metabolic process (GO:0008152);; biological process: cellular process (GO:0009987);; biological process: single-organism process (GO:0044699);; biological process: response to stimulus (GO:0050896);; biological process: detoxification (GO:0098754);; molecular function:…	Phenylpropanoid biosynthesis (ko00940)
	Unigene_193418	PRX112	--	--	--	3.08237e-07	8.28621	up	Peroxidase	Peroxidase 2 OS=Oryza sativa subsp. indica OX=39946 GN=PRX112 PE=3 SV=2	peroxidase 2-like [Aegilops tauschii subsp. tauschii]	molecular function: catalytic activity (GO:0003824);; molecular function: antioxidant activity (GO:0016209);; biological process: metabolic process (GO:0008152);; biological process: cellular process (GO:0009987);; biological process: single-organism process (GO:0044699);; biological process: response to stimulus (GO:0050896);; biological process: detoxification (GO:0098754);; molecular function:…	Phenylpropanoid biosynthesis (ko00940)
Glutathione S-transferase (GST)	Unigene_005955	DHAR1	0.000965969	3.7646	up	0.00885271	3.46919	up	Glutathione S-transferase, N-terminal domain;; Glutathione S-transferase, N-terminal domain;; Glutathione S-transferase, N-terminal domain;; Glutathione S-transferase, C-terminal domain	Probable glutathione S-transferase DHAR1, cytosolic OS=Oryza sativa subsp. japonica OX=39947 GN=DHAR1 PE=1 SV=1	probable glutathione S-transferase DHAR1, cytosolic [Brachypodium distachyon]	biological process: response to stimulus (GO:0050896);; molecular function: catalytic activity (GO:0003824);; molecular function: binding (GO:0005488);; cellular component: extracellular region (GO:0005576);; cellular component: cell (GO:0005623);; cellular component: cell part (GO:0044464);; cellular component: organelle (GO:0043226);; cellular component: membrane (GO:0016020);; biological proce…	Ascorbate and aldarate metabolism (ko00053);; Glutathione metabolism (ko00480)
	Unigene_317329	DHAR1	0.000631584	4.32594	up	0.019716	2.45854	normal	Glutathione S-transferase, N-terminal domain;; Glutathione S-transferase, N-terminal domain;; Glutathione S-transferase, N-terminal domain	Probable glutathione S-transferase DHAR1, cytosolic OS=Oryza sativa subsp. japonica OX=39947 GN=DHAR1 PE=1 SV=1	dehydroascorbate reductase [Puccinellia tenuiflora]	biological process: response to stimulus (GO:0050896);; molecular function: catalytic activity (GO:0003824);; molecular function: binding (GO:0005488);; cellular component: extracellular region (GO:0005576);; cellular component: cell (GO:0005623);; cellular component: cell part (GO:0044464);; cellular component: organelle (GO:0043226);; cellular component: membrane (GO:0016020);; biological proce…	Ascorbate and aldarate metabolism (ko00053);; Glutathione metabolism (ko00480)
	Unigene_193967	DHAR2	2.29936e-05	5.56746	up	0.00446698	3.84972	up	Glutathione S-transferase, N-terminal domain;; Glutathione S-transferase, N-terminal domain;; Glutathione S-transferase, C-terminal domain;; Glutathione S-transferase, N-terminal domain	Probable glutathione S-transferase DHAR2, chloroplastic OS=Oryza sativa subsp. japonica OX=39947 GN=DHAR2 PE=2 SV=1	predicted protein [Hordeum vulgare subsp. vulgare]	molecular function: catalytic activity (GO:0003824);; molecular function: binding (GO:0005488);; cellular component: cell (GO:0005623);; cellular component: cell part (GO:0044464);; cellular component: membrane (GO:0016020);; biological process: metabolic process (GO:0008152);; biological process: cellular process (GO:0009987);; cellular component: organelle (GO:0043226);; cellular component: org…	Ascorbate and aldarate metabolism (ko00053);; Glutathione metabolism (ko00480)
	Unigene_434195	GST1	--	--	--	9.18584e-05	4.93996	up	Glutathione S-transferase, C-terminal domain;; Glutathione S-transferase, C-terminal domain	Glutathione S-transferase 1 OS=Zea mays OX=4577 GN=GST1 PE=1 SV=4	glutathione S-transferase 1-like [Aegilops tauschii subsp. tauschii]	biological process: response to stimulus (GO:0050896);; molecular function: catalytic activity (GO:0003824);; cellular component: cell (GO:0005623);; cellular component: cell part (GO:0044464);; biological process: metabolic process (GO:0008152);; biological process: cellular process (GO:0009987);; cellular component: macromolecular complex (GO:0032991)	Glutathione metabolism (ko00480)
	Unigene_502298	GST1	0.0498181	-3.31948	normal	0.00112699	-4.21602	down	Glutathione S-transferase, C-terminal domain;; Glutathione S-transferase, C-terminal domain;; Glutathione S-transferase, C-terminal domain;; Glutathione S-transferase, N-terminal domain;; Glutathione S-transferase, N-terminal domain;; Glutathione S-transferase, N-terminal domain	Glutathione S-transferase 1 OS=Zea mays OX=4577 GN=GST1 PE=1 SV=4	unnamed protein product [Triticum turgidum subsp. durum]	molecular function: binding (GO:0005488)	Glutathione metabolism (ko00480)
	Unigene_523928	GST1	1.14553e-05	-5.41029	down	0.0269062	-2.68676	normal	--	Glutathione S-transferase 1 OS=Zea mays OX=4577 GN=GST1 PE=1 SV=4	glutathione-S-transferase, I subunit [Hordeum vulgare subsp. vulgare]	biological process: response to stimulus (GO:0050896);; molecular function: catalytic activity (GO:0003824);; molecular function: binding (GO:0005488);; cellular component: cell (GO:0005623);; cellular component: cell part (GO:0044464);; biological process: metabolic process (GO:0008152);; biological process: cellular process (GO:0009987);; cellular component: macromolecular complex (GO:0032991)	Glutathione metabolism (ko00480)
	Unigene_308188	GSTA1	0.00287888	4.30329	up	0.00621448	4.46295	up	Glutathione S-transferase, N-terminal domain;; Glutathione S-transferase, C-terminal domain;; Glutathione S-transferase, N-terminal domain;; Glutathione S-transferase, C-terminal domain;; Glutathione S-transferase, N-terminal domain;; Glutathione S-transferase, C-terminal domain	Glutathione S-transferase 1 OS=Triticum aestivum OX=4565 GN=GSTA1 PE=2 SV=1	hypothetical protein CFC21_056549 [Triticum aestivum]	molecular function: binding (GO:0005488)	Glutathione metabolism (ko00480)
	Unigene_038802	GSTF1	--	--	--	8.54855e-12	11.8041	up	Glutathione S-transferase, C-terminal domain;; Glutathione S-transferase, N-terminal domain;; Glutathione S-transferase, N-terminal domain;; Glutathione S-transferase, C-terminal domain;; Glutathione S-transferase, C-terminal domain;; Glutathione S-transferase, N-terminal domain;; SWIM zinc finger	Probable glutathione S-transferase GSTF1 OS=Oryza sativa subsp. japonica OX=39947 GN=GSTF1 PE=1 SV=2	glutathione transferase [Alopecurus myosuroides]	molecular function: binding (GO:0005488)	Glutathione metabolism (ko00480)
	Unigene_500887	GSTF1	--	--	--	9.05404e-09	10.0923	up	Glutathione S-transferase, C-terminal domain;; Glutathione S-transferase, C-terminal domain;; Glutathione S-transferase, C-terminal domain	Probable glutathione S-transferase GSTF1 OS=Oryza sativa subsp. japonica OX=39947 GN=GSTF1 PE=1 SV=2	glutathione S-transferase [Alopecurus japonicus]	--	Glutathione metabolism (ko00480)
	Unigene_510653	GSTF1	0.00010685	-5.0595	down	5.27153e-05	-4.68867	down	Glutathione S-transferase, N-terminal domain;; Glutathione S-transferase, N-terminal domain;; Glutathione S-transferase, N-terminal domain;; Glutathione S-transferase, C-terminal domain;; Glutathione S-transferase, C-terminal domain;; Glutathione S-transferase, C-terminal domain	Probable glutathione S-transferase GSTF1 OS=Oryza sativa subsp. japonica OX=39947 GN=GSTF1 PE=1 SV=2	hypothetical protein CFC21_073927 [Triticum aestivum]	molecular function: binding (GO:0005488)	Glutathione metabolism (ko00480)
	Unigene_584251	GSTF1	0.00325215	-4.02189	down	0.00323501	-3.86225	down	Glutathione S-transferase, C-terminal domain;; Glutathione S-transferase, C-terminal domain;; Glutathione S-transferase, C-terminal domain;; Glutathione S-transferase, N-terminal domain	Probable glutathione S-transferase GSTF1 OS=Oryza sativa subsp. japonica OX=39947 GN=GSTF1 PE=1 SV=2	hypothetical protein CFC21_073927 [Triticum aestivum]	molecular function: binding (GO:0005488)	Glutathione metabolism (ko00480)
	Unigene_038042	GSTF11	0.00436943	3.93706	up	0.0452447	3.14939	normal	Glutathione S-transferase, N-terminal domain;; Glutathione S-transferase, N-terminal domain;; Glutathione S-transferase, C-terminal domain;; Glutathione S-transferase, N-terminal domain;; Glutathione S-transferase, C-terminal domain;; Glutathione S-transferase, C-terminal domain	Glutathione S-transferase F11 OS=Arabidopsis thaliana OX=3702 GN=GSTF11 PE=2 SV=1	glutathione S-transferase F11 [Brachypodium distachyon]	molecular function: binding (GO:0005488)	Glutathione metabolism (ko00480)
	Unigene_198275	GSTF13	--	--	--	0.00739015	3.74237	up	Glutathione S-transferase, C-terminal domain;; Glutathione S-transferase, N-terminal domain	Glutathione S-transferase F13 OS=Arabidopsis thaliana OX=3702 GN=GSTF13 PE=3 SV=1	hypothetical protein CFC21_039552 [Triticum aestivum]	molecular function: binding (GO:0005488)	Glutathione metabolism (ko00480)
	Unigene_318106	GSTF2	0.000610832	5.03564	up	0.00298217	3.96425	up	Glutathione S-transferase, C-terminal domain;; Glutathione S-transferase, C-terminal domain;; Glutathione S-transferase, C-terminal domain	Probable glutathione S-transferase GSTF2 OS=Oryza sativa subsp. japonica OX=39947 GN=GSTF2 PE=1 SV=3	unnamed protein product [Triticum turgidum subsp. durum]	biological process: response to stimulus (GO:0050896);; molecular function: catalytic activity (GO:0003824);; cellular component: cell (GO:0005623);; cellular component: cell part (GO:0044464);; biological process: metabolic process (GO:0008152);; biological process: cellular process (GO:0009987);; cellular component: macromolecular complex (GO:0032991)	Glutathione metabolism (ko00480)
	Unigene_018188	GSTF8	0.00702566	3.97786	up	0.0138899	3.09583	normal	Glutathione S-transferase, C-terminal domain;; Glutathione S-transferase, N-terminal domain;; Glutathione S-transferase, N-terminal domain;; Glutathione S-transferase, C-terminal domain	Glutathione S-transferase F8, chloroplastic OS=Arabidopsis thaliana OX=3702 GN=GSTF8 PE=1 SV=3	hypothetical protein CFC21_059250 [Triticum aestivum]	molecular function: binding (GO:0005488)	Glutathione metabolism (ko00480)
	Unigene_179228	GSTU1	--	--	--	9.92083e-11	11.1327	up	Glutathione S-transferase, N-terminal domain;; Glutathione S-transferase, N-terminal domain;; Glutathione S-transferase, N-terminal domain;; Glutathione S-transferase, C-terminal domain;; Glutathione S-transferase, C-terminal domain	Probable glutathione S-transferase GSTU1 OS=Oryza sativa subsp. japonica OX=39947 GN=GSTU1 PE=1 SV=1	GST [Lolium perenne]	biological process: response to stimulus (GO:0050896);; molecular function: catalytic activity (GO:0003824);; molecular function: binding (GO:0005488);; cellular component: extracellular region (GO:0005576);; cellular component: cell (GO:0005623);; cellular component: cell part (GO:0044464);; cellular component: organelle (GO:0043226);; cellular component: membrane (GO:0016020);; cellular compone…	Glutathione metabolism (ko00480)
	Unigene_188320	GSTU6	0.000379292	-5.42407	down	0.0161864	-3.21228	normal	Glutathione S-transferase, N-terminal domain;; Glutathione S-transferase, N-terminal domain;; Glutathione S-transferase, C-terminal domain;; Glutathione S-transferase, N-terminal domain;; Glutathione S-transferase N-terminal domain;; Glutathione S-transferase, C-terminal domain	Probable glutathione S-transferase GSTU6 OS=Oryza sativa subsp. japonica OX=39947 GN=GSTU6 PE=2 SV=2	glutathione transferase [Alopecurus myosuroides]	molecular function: binding (GO:0005488)	Glutathione metabolism (ko00480)
	Unigene_311027	GSTU6	0.00604279	4.11022	up	--	--	--	Glutathione S-transferase, N-terminal domain;; Glutathione S-transferase, N-terminal domain;; Glutathione S-transferase, N-terminal domain;; Glutathione S-transferase, C-terminal domain;; Glutathione S-transferase, C-terminal domain	Probable glutathione S-transferase GSTU6 OS=Oryza sativa subsp. japonica OX=39947 GN=GSTU6 PE=2 SV=2	hypothetical protein CFC21_062304 [Triticum aestivum]	molecular function: binding (GO:0005488)	Glutathione metabolism (ko00480)
Monodehydroascorbate reductase (MDAR)	Unigene_062488	MDAR3	--	--	--	9.89241e-10	7.98597	up	Pyridine nucleotide-disulphide oxidoreductase;; Pyridine nucleotide-disulphide oxidoreductase;; Tryptophan halogenase	Monodehydroascorbate reductase 3, cytosolic OS=Oryza sativa subsp. japonica OX=39947 GN=MDAR3 PE=1 SV=1	monodehydroascorbate reductase [Deschampsia antarctica]	biological process: response to stimulus (GO:0050896);; molecular function: catalytic activity (GO:0003824);; cellular component: cell (GO:0005623);; cellular component: cell part (GO:0044464);; cellular component: organelle (GO:0043226);; cellular component: membrane (GO:0016020);; cellular component: organelle part (GO:0044422);; biological process: metabolic process (GO:0008152);; biological p…	Ascorbate and aldarate metabolism (ko00053)
	Unigene_175373	MDAR3	0.0797496	4.35376	normal	7.27976e-05	6.21151	up	Pyridine nucleotide-disulphide oxidoreductase;; Tryptophan halogenase	Monodehydroascorbate reductase 3, cytosolic OS=Oryza sativa subsp. japonica OX=39947 GN=MDAR3 PE=1 SV=1	monodehydroascorbate reductase [Deschampsia antarctica]	biological process: response to stimulus (GO:0050896);; molecular function: catalytic activity (GO:0003824);; cellular component: cell (GO:0005623);; cellular component: cell part (GO:0044464);; cellular component: organelle (GO:0043226);; cellular component: membrane (GO:0016020);; cellular component: organelle part (GO:0044422);; biological process: metabolic process (GO:0008152);; biological p…	Ascorbate and aldarate metabolism (ko00053)
	Unigene_323317	MDAR5	0.00181623	3.79873	up	0.00150488	3.31054	up	Pyridine nucleotide-disulphide oxidoreductase;; Pyridine nucleotide-disulphide oxidoreductase;; Pyridine nucleotide-disulphide oxidoreductase;; FAD binding domain	Monodehydroascorbate reductase 5, chlorplastic OS=Oryza sativa subsp. japonica OX=39947 GN=MDAR5 PE=2 SV=2	monodehydroascorbate reductase 5, chlorplastic isoform X1 [Brachypodium distachyon]	molecular function: binding (GO:0005488);; cellular component: cell (GO:0005623);; cellular component: cell part (GO:0044464);; cellular component: organelle (GO:0043226);; biological process: response to stimulus (GO:0050896);; cellular component: organelle part (GO:0044422);; molecular function: catalytic activity (GO:0003824);; biological process: metabolic process (GO:0008152);; biological pr…	Ascorbate and aldarate metabolism (ko00053)
Glutathione reductase (GR)	Unigene_198831	GOR	0.00254756	3.42365	up	0.0121523	2.69594	normal	Pyridine nucleotide-disulphide oxidoreductase;; Pyridine nucleotide-disulphide oxidoreductase, dimerisation domain;; Pyridine nucleotide-disulphide oxidoreductase;; Pyridine nucleotide-disulphide oxidoreductase;; L-lysine 6-monooxygenase (NADPH-requiring)	Glutathione reductase, chloroplastic (Fragment) OS=Nicotiana tabacum OX=4097 GN=GOR PE=1 SV=1	glutathione reductase, chloroplastic [Brachypodium distachyon]	molecular function: binding (GO:0005488);; biological process: response to stimulus (GO:0050896);; molecular function: catalytic activity (GO:0003824);; molecular function: antioxidant activity (GO:0016209);; biological process: metabolic process (GO:0008152);; biological process: cellular process (GO:0009987);; biological process: single-organism process (GO:0044699);; biological process: detoxi…	Glutathione metabolism (ko00480)
	Unigene_070974	GOR	--	--	--	1.35239e-09	10.5482	up	Pyridine nucleotide-disulphide oxidoreductase;; Pyridine nucleotide-disulphide oxidoreductase;; Pyridine nucleotide-disulphide oxidoreductase;; L-lysine 6-monooxygenase (NADPH-requiring)	Glutathione reductase, chloroplastic (Fragment) OS=Nicotiana tabacum OX=4097 GN=GOR PE=1 SV=1	glutathione reductase, chloroplastic [Brachypodium distachyon]	molecular function: binding (GO:0005488);; biological process: response to stimulus (GO:0050896);; molecular function: catalytic activity (GO:0003824);; molecular function: antioxidant activity (GO:0016209);; biological process: metabolic process (GO:0008152);; biological process: cellular process (GO:0009987);; biological process: single-organism process (GO:0044699);; biological process: detoxi…	Glutathione metabolism (ko00480)
	Unigene_197676	GRC2	0.0125284	3.17097	normal	0.00749011	3.74054	up	Pyridine nucleotide-disulphide oxidoreductase;; Pyridine nucleotide-disulphide oxidoreductase, dimerisation domain;; Pyridine nucleotide-disulphide oxidoreductase;; Pyridine nucleotide-disulphide oxidoreductase	Glutathione reductase, cytosolic OS=Oryza sativa subsp. japonica OX=39947 GN=GRC2 PE=2 SV=2	glutathione reductase, cytosolic [Brachypodium distachyon]	biological process: response to stimulus (GO:0050896);; molecular function: catalytic activity (GO:0003824);; molecular function: antioxidant activity (GO:0016209);; biological process: metabolic process (GO:0008152);; biological process: cellular process (GO:0009987);; biological process: single-organism process (GO:0044699);; biological process: detoxification (GO:0098754);; cellular component:…	Glutathione metabolism (ko00480)
	Unigene_323465	GRC2	--	--	--	4.33275e-11	10.3653	up	Pyridine nucleotide-disulphide oxidoreductase;; Pyridine nucleotide-disulphide oxidoreductase, dimerisation domain;; Pyridine nucleotide-disulphide oxidoreductase;; Pyridine nucleotide-disulphide oxidoreductase	Glutathione reductase, cytosolic OS=Oryza sativa subsp. japonica OX=39947 GN=GRC2 PE=2 SV=2	cytosolic glutathione reductase [Hordeum vulgare]	biological process: response to stimulus (GO:0050896);; molecular function: catalytic activity (GO:0003824);; molecular function: antioxidant activity (GO:0016209);; biological process: metabolic process (GO:0008152);; biological process: cellular process (GO:0009987);; biological process: single-organism process (GO:0044699);; biological process: detoxification (GO:0098754);; cellular component:…	Glutathione metabolism (ko00480)
	Unigene_527275	GRC2	0.00013633	4.67512	up	0.0942166	2.305	normal	Pyridine nucleotide-disulphide oxidoreductase;; Pyridine nucleotide-disulphide oxidoreductase, dimerisation domain;; Pyridine nucleotide-disulphide oxidoreductase;; Pyridine nucleotide-disulphide oxidoreductase	Glutathione reductase, cytosolic OS=Oryza sativa subsp. japonica OX=39947 GN=GRC2 PE=2 SV=2	glutathione reductase, cytosolic [Brachypodium distachyon]	biological process: response to stimulus (GO:0050896);; molecular function: catalytic activity (GO:0003824);; molecular function: antioxidant activity (GO:0016209);; biological process: metabolic process (GO:0008152);; biological process: cellular process (GO:0009987);; biological process: single-organism process (GO:0044699);; biological process: detoxification (GO:0098754);; cellular component:…	Glutathione metabolism (ko00480)
Glutathione peroxidase (GPX)	Unigene_315836	GPX1	0.000411359	4.66292	up	0.00928807	3.13041	up	Glutathione peroxidase;; AhpC/TSA family;; Redoxin	Phospholipid hydroperoxide glutathione peroxidase 1, chloroplastic OS=Arabidopsis thaliana OX=3702 GN=GPX1 PE=2 SV=2	phospholipid hydroperoxide glutathione peroxidase 1, chloroplastic-like [Aegilops tauschii subsp. tauschii]	molecular function: catalytic activity (GO:0003824);; molecular function: antioxidant activity (GO:0016209);; biological process: metabolic process (GO:0008152);; biological process: cellular process (GO:0009987);; biological process: single-organism process (GO:0044699);; biological process: response to stimulus (GO:0050896);; biological process: detoxification (GO:0098754);; cellular component:…	Glutathione metabolism (ko00480);; Arachidonic acid metabolism (ko00590)
	Unigene_074627	——	0.00103031	4.36733	up	0.0190001	3.21158	normal	Plants and Prokaryotes Conserved (PCC) domain;; Glutathione peroxidase;; AhpC/TSA family;; Redoxin	Probable phospholipid hydroperoxide glutathione peroxidase OS=Spinacia oleracea OX=3562 PE=2 SV=1	hypothetical protein CFC21_020326 [Triticum aestivum]	molecular function: catalytic activity (GO:0003824);; molecular function: antioxidant activity (GO:0016209);; biological process: metabolic process (GO:0008152);; biological process: cellular process (GO:0009987);; biological process: single-organism process (GO:0044699);; biological process: response to stimulus (GO:0050896);; biological process: detoxification (GO:0098754)	Glutathione metabolism (ko00480);; Arachidonic acid metabolism (ko00590)
	Unigene_175842	GPX4	--	--	--	6.55972e-08	7.97443	up	Glutathione peroxidase;; AhpC/TSA family;; Redoxin	Probable glutathione peroxidase 4 OS=Arabidopsis thaliana OX=3702 GN=GPX4 PE=2 SV=1	hypothetical protein CFC21_057475 [Triticum aestivum]	biological process: reproduction (GO:0000003);; biological process: reproductive process (GO:0022414);; biological process: developmental process (GO:0032502);; molecular function: catalytic activity (GO:0003824);; molecular function: antioxidant activity (GO:0016209);; biological process: metabolic process (GO:0008152);; biological process: cellular process (GO:0009987);; biological process: sin…	Glutathione metabolism (ko00480);; Arachidonic acid metabolism (ko00590)
	Unigene_191978	GPX6	--	--	--	9.89879e-05	5.35737	up	Glutathione peroxidase	Probable phospholipid hydroperoxide glutathione peroxidase 6, mitochondrial OS=Arabidopsis thaliana OX=3702 GN=GPX6 PE=2 SV=2	uncharacterized protein LOC101759642 [Setaria italica]	molecular function: catalytic activity (GO:0003824);; molecular function: antioxidant activity (GO:0016209);; biological process: metabolic process (GO:0008152);; biological process: cellular process (GO:0009987);; biological process: single-organism process (GO:0044699);; biological process: response to stimulus (GO:0050896);; biological process: detoxification (GO:0098754)	Glutathione metabolism (ko00480);; Arachidonic acid metabolism (ko00590)
Ascorbate peroxidase (APX)	Unigene_517994	APX1	9.90502e-05	-4.13655	down	3.2402e-06	-5.23039	down	Peroxidase;; Peroxidase	L-ascorbate peroxidase 1, cytosolic OS=Oryza sativa subsp. japonica OX=39947 GN=APX1 PE=1 SV=1	unnamed protein product [Triticum turgidum subsp. durum]	biological process: response to stimulus (GO:0050896);; molecular function: catalytic activity (GO:0003824);; molecular function: antioxidant activity (GO:0016209);; biological process: metabolic process (GO:0008152);; biological process: cellular process (GO:0009987);; biological process: single-organism process (GO:0044699);; biological process: detoxification (GO:0098754);; cellular component:…	Ascorbate and aldarate metabolism (ko00053);; Glutathione metabolism (ko00480)
	Unigene_311804	APX2	--	--	--	1.72052e-08	7.71415	up	Peroxidase	L-ascorbate peroxidase 2, cytosolic OS=Oryza sativa subsp. japonica OX=39947 GN=APX2 PE=1 SV=1	ascorbate peroxidase [Hordeum vulgare subsp. vulgare]	biological process: response to stimulus (GO:0050896);; molecular function: catalytic activity (GO:0003824);; molecular function: antioxidant activity (GO:0016209);; biological process: metabolic process (GO:0008152);; biological process: cellular process (GO:0009987);; biological process: single-organism process (GO:0044699);; biological process: detoxification (GO:0098754);; cellular component:…	Ascorbate and aldarate metabolism (ko00053);; Glutathione metabolism (ko00480)
	Unigene_071871	APX4	--	--	--	0.000138985	4.9062	up	Peroxidase	Probable L-ascorbate peroxidase 4, peroxisomal OS=Oryza sativa subsp. japonica OX=39947 GN=APX4 PE=2 SV=1	ascorbate peroxidase [Puccinellia tenuiflora]	biological process: response to stimulus (GO:0050896);; molecular function: catalytic activity (GO:0003824);; molecular function: antioxidant activity (GO:0016209);; biological process: metabolic process (GO:0008152);; biological process: cellular process (GO:0009987);; biological process: single-organism process (GO:0044699);; biological process: detoxification (GO:0098754);; cellular component:…	Ascorbate and aldarate metabolism (ko00053);; Glutathione metabolism (ko00480)
	Unigene_308856	APX4	--	--	--	1.97861e-08	9.79562	up	Peroxidase	Probable L-ascorbate peroxidase 4, peroxisomal OS=Oryza sativa subsp. japonica OX=39947 GN=APX4 PE=2 SV=1	ascorbate peroxidase [Puccinellia tenuiflora]	biological process: response to stimulus (GO:0050896);; molecular function: catalytic activity (GO:0003824);; molecular function: antioxidant activity (GO:0016209);; biological process: metabolic process (GO:0008152);; biological process: cellular process (GO:0009987);; biological process: single-organism process (GO:0044699);; biological process: detoxification (GO:0098754);; cellular component:…	Ascorbate and aldarate metabolism (ko00053);; Glutathione metabolism (ko00480)
	Unigene_001356	APX7	0.00283462	4.2149	up	0.0509827	2.62101	normal	Peroxidase	Probable L-ascorbate peroxidase 7, chloroplastic OS=Oryza sativa subsp. japonica OX=39947 GN=APX7 PE=2 SV=1	hypothetical protein CFC21_023810 [Triticum aestivum]	biological process: response to stimulus (GO:0050896);; molecular function: catalytic activity (GO:0003824);; molecular function: antioxidant activity (GO:0016209);; biological process: metabolic process (GO:0008152);; biological process: cellular process (GO:0009987);; biological process: single-organism process (GO:0044699);; biological process: detoxification (GO:0098754);; cellular component:…	Ascorbate and aldarate metabolism (ko00053);; Glutathione metabolism (ko00480)
	Unigene_074998	APX8	--	--	--	7.04474e-11	11.1526	up	Peroxidase;; TPR repeat;; Uncharacterized protein family UPF0016	Probable L-ascorbate peroxidase 8, chloroplastic OS=Oryza sativa subsp. japonica OX=39947 GN=APX8 PE=1 SV=2	probable L-ascorbate peroxidase 8, chloroplastic isoform X2 [Aegilops tauschii subsp. tauschii]	biological process: response to stimulus (GO:0050896);; molecular function: catalytic activity (GO:0003824);; molecular function: antioxidant activity (GO:0016209);; biological process: metabolic process (GO:0008152);; biological process: cellular process (GO:0009987);; biological process: single-organism process (GO:0044699);; biological process: detoxification (GO:0098754);; cellular component:…	Ascorbate and aldarate metabolism (ko00053);; Glutathione metabolism (ko00480)
Glutamate dehydrogenase(GDH)	Unigene_199099	——	--	--	--	3.71833e-05	5.46054	up	Glu/Leu/Phe/Val dehydrogenase, dimerisation domain;; Glutamate/Leucine/Phenylalanine/Valine dehydrogenase;; Glu/Leu/Phe/Val dehydrogenase, dimerisation domain;; RWD domain	NADP-specific glutamate dehydrogenase OS=Giardia intestinalis OX=5741 PE=2 SV=1	NADP-specific glutamate dehydrogenase isoform X1 [Aegilops tauschii subsp. tauschii]	molecular function: catalytic activity (GO:0003824);; biological process: metabolic process (GO:0008152);; biological process: single-organism process (GO:0044699);; molecular function: binding (GO:0005488);; cellular component: cell (GO:0005623);; cellular component: cell part (GO:0044464);; biological process: cellular process (GO:0009987)	Arginine biosynthesis (ko00220);; Alanine, aspartate and glutamate metabolism (ko00250);; Nitrogen metabolism (ko00910)
	Unigene_605218	——	0.00868277	3.17787	up	0.0909771	2.03711	normal	Glu/Leu/Phe/Val dehydrogenase, dimerisation domain;; Glutamate/Leucine/Phenylalanine/Valine dehydrogenase;; Glutamate/Leucine/Phenylalanine/Valine dehydrogenase	NADP-specific glutamate dehydrogenase OS=Giardia intestinalis OX=5741 PE=2 SV=1	NADP-specific glutamate dehydrogenase isoform X2 [Aegilops tauschii subsp. tauschii]	molecular function: catalytic activity (GO:0003824);; biological process: metabolic process (GO:0008152);; biological process: single-organism process (GO:0044699);; cellular component: cell (GO:0005623);; cellular component: cell part (GO:0044464);; biological process: cellular process (GO:0009987)	Arginine biosynthesis (ko00220);; Alanine, aspartate and glutamate metabolism (ko00250);; Nitrogen metabolism (ko00910)
Glutathione synthetase (GSH)	Unigene_072224	GSH1-1	--	--	--	2.69795e-07	9.38487	up	Glutamate-cysteine ligase family 2(GCS2)	Glutamate--cysteine ligase A, chloroplastic OS=Oryza sativa subsp. indica OX=39946 GN=GSH1-1 PE=2 SV=2	glutamate--cysteine ligase B, chloroplastic [Aegilops tauschii subsp. tauschii]	biological process: reproduction (GO:0000003);; biological process: response to stimulus (GO:0050896);; biological process: immune system process (GO:0002376);; biological process: reproductive process (GO:0022414);; biological process: developmental process (GO:0032502);; molecular function: catalytic activity (GO:0003824);; cellular component: cell (GO:0005623);; cellular component: cell part (…	Cysteine and methionine metabolism (ko00270);; Glutathione metabolism (ko00480)
	Unigene_324554	GSH1-1	--	--	--	3.52341e-07	6.91573	up	Glutamate-cysteine ligase family 2(GCS2)	Glutamate--cysteine ligase A, chloroplastic OS=Oryza sativa subsp. indica OX=39946 GN=GSH1-1 PE=2 SV=2	unnamed protein product [Triticum turgidum subsp. durum]	biological process: reproduction (GO:0000003);; biological process: response to stimulus (GO:0050896);; biological process: immune system process (GO:0002376);; biological process: reproductive process (GO:0022414);; biological process: developmental process (GO:0032502);; molecular function: catalytic activity (GO:0003824);; cellular component: cell (GO:0005623);; cellular component: cell part (…	Cysteine and methionine metabolism (ko00270);; Glutathione metabolism (ko00480)
	Unigene_520664	GSH2	3.14833e-05	-4.91117	down	0.000755197	-3.48498	down	Eukaryotic glutathione synthase, ATP binding domain;; Eukaryotic glutathione synthase;; Eukaryotic glutathione synthase, ATP binding domain;; Eukaryotic glutathione synthase;; Eukaryotic glutathione synthase, ATP binding domain;; Eukaryotic glutathione synthase	Glutathione synthetase, chloroplastic OS=Brassica juncea OX=3707 GN=GSH2 PE=2 SV=1	predicted protein [Hordeum vulgare subsp. vulgare]	molecular function: catalytic activity (GO:0003824);; biological process: metabolic process (GO:0008152);; biological process: cellular process (GO:0009987);; molecular function: binding (GO:0005488)	Cysteine and methionine metabolism (ko00270);; Glutathione metabolism (ko00480)
	Unigene_600305	GSH2	0.00432677	-2.76663	down	0.00503965	-2.30966	down	Eukaryotic glutathione synthase, ATP binding domain;; Eukaryotic glutathione synthase	Glutathione synthetase, chloroplastic OS=Brassica juncea OX=3707 GN=GSH2 PE=2 SV=1	predicted protein [Hordeum vulgare subsp. vulgare]	molecular function: catalytic activity (GO:0003824);; biological process: metabolic process (GO:0008152);; biological process: cellular process (GO:0009987);; molecular function: binding (GO:0005488)	Cysteine and methionine metabolism (ko00270);; Glutathione metabolism (ko00480)
Respiratory burst oxidase (RBOH)	Unigene_026743	RBOHA	0.000918925	4.04144	up	0.0201054	3.19896	normal	Ferric reductase NAD binding domain;; FAD-binding domain;; Ferric reductase like transmembrane component;; Respiratory burst NADPH oxidase	Respiratory burst oxidase homolog protein A OS=Solanum tuberosum OX=4113 GN=RBOHA PE=1 SV=1	hypothetical protein GQ55_5G169500 [Panicum hallii var. hallii]	molecular function: catalytic activity (GO:0003824);; molecular function: antioxidant activity (GO:0016209);; biological process: metabolic process (GO:0008152);; biological process: cellular process (GO:0009987);; biological process: single-organism process (GO:0044699);; biological process: response to stimulus (GO:0050896);; biological process: detoxification (GO:0098754)	MAPK signaling pathway - plant (ko04016);; Plant-pathogen interaction (ko04626)
	Unigene_073739	RBOHA	0.000293791	4.18983	up	0.00263195	3.71573	up	Ferric reductase NAD binding domain;; FAD-binding domain;; Ferric reductase like transmembrane component	Respiratory burst oxidase homolog protein A OS=Solanum tuberosum OX=4113 GN=RBOHA PE=1 SV=1	respiratory burst oxidase homolog protein A [Brachypodium distachyon]	molecular function: catalytic activity (GO:0003824);; biological process: metabolic process (GO:0008152);; biological process: single-organism process (GO:0044699)	MAPK signaling pathway - plant (ko04016);; Plant-pathogen interaction (ko04626)
	Unigene_074021	RBOHA	0.000807489	4.14279	up	0.00375667	3.39108	up	Ferric reductase NAD binding domain;; FAD-binding domain;; Ferric reductase like transmembrane component	Putative respiratory burst oxidase homolog protein H OS=Arabidopsis thaliana OX=3702 GN=RBOHH PE=3 SV=1	putative respiratory burst oxidase homolog protein H [Brachypodium distachyon]	molecular function: catalytic activity (GO:0003824);; biological process: metabolic process (GO:0008152);; biological process: single-organism process (GO:0044699)	MAPK signaling pathway - plant (ko04016)
	Unigene_326208	RBOHA	--	--	--	1.43923e-08	9.12045	up	Ferric reductase NAD binding domain;; FAD-binding domain;; Ferric reductase like transmembrane component	Respiratory burst oxidase homolog protein A OS=Solanum tuberosum OX=4113 GN=RBOHA PE=1 SV=1	respiratory burst oxidase homolog protein A [Brachypodium distachyon]	molecular function: catalytic activity (GO:0003824);; biological process: metabolic process (GO:0008152);; biological process: single-organism process (GO:0044699)	MAPK signaling pathway - plant (ko04016);; Plant-pathogen interaction (ko04626)
	Unigene_195382	RBOHB	0.00773061	4.69827	up	0.00660256	4.72572	up	FAD-binding domain;; Ferric reductase like transmembrane component;; EF-hand domain pair;; EF hand	Respiratory burst oxidase homolog protein B OS=Solanum tuberosum OX=4113 GN=RBOHB PE=1 SV=1	respiratory burst oxidase homolog protein B-like [Aegilops tauschii subsp. tauschii]	molecular function: binding (GO:0005488);; molecular function: catalytic activity (GO:0003824);; biological process: metabolic process (GO:0008152);; biological process: single-organism process (GO:0044699)	MAPK signaling pathway - plant (ko04016);; Plant-pathogen interaction (ko04626)
	Unigene_322077	RBOHB	0.000822602	4.06489	up	0.00670376	2.83218	up	Respiratory burst NADPH oxidase;; FAD-binding domain;; Ferric reductase like transmembrane component;; EF hand;; EF-hand domain pair;; EF-hand domain;; Ferric reductase NAD binding domain	Respiratory burst oxidase homolog protein B OS=Oryza sativa subsp. indica OX=39946 GN=RBOHB PE=2 SV=1	--	molecular function: catalytic activity (GO:0003824);; molecular function: antioxidant activity (GO:0016209);; biological process: metabolic process (GO:0008152);; biological process: cellular process (GO:0009987);; biological process: single-organism process (GO:0044699);; biological process: response to stimulus (GO:0050896);; biological process: detoxification (GO:0098754)	MAPK signaling pathway - plant (ko04016);; Plant-pathogen interaction (ko04626)
	Unigene_325517	RBOHB	0.00525195	4.62134	up	0.00233722	4.65416	up	Respiratory burst NADPH oxidase;; FAD-binding domain;; Ferric reductase like transmembrane component	Respiratory burst oxidase homolog protein B OS=Solanum tuberosum OX=4113 GN=RBOHB PE=1 SV=1	hypothetical protein CFC21_071654 [Triticum aestivum]	molecular function: catalytic activity (GO:0003824);; molecular function: antioxidant activity (GO:0016209);; biological process: metabolic process (GO:0008152);; biological process: cellular process (GO:0009987);; biological process: single-organism process (GO:0044699);; biological process: response to stimulus (GO:0050896);; biological process: detoxification (GO:0098754)	MAPK signaling pathway - plant (ko04016);; Plant-pathogen interaction (ko04626)
	Unigene_326207	RBOHB	--	--	--	2.30176e-08	9.79584	up	Respiratory burst NADPH oxidase	Respiratory burst oxidase homolog protein A OS=Solanum tuberosum OX=4113 GN=RBOHA PE=1 SV=1	hypothetical protein TRIUR3_23393 [Triticum urartu]	molecular function: catalytic activity (GO:0003824);; molecular function: antioxidant activity (GO:0016209);; biological process: metabolic process (GO:0008152);; biological process: cellular process (GO:0009987);; biological process: single-organism process (GO:0044699);; biological process: response to stimulus (GO:0050896);; biological process: detoxification (GO:0098754)	MAPK signaling pathway - plant (ko04016);; Plant-pathogen interaction (ko04626)
	Unigene_056055	RBOHE	--	--	--	6.54457e-09	9.22096	up	FAD-binding domain;; Ferric reductase like transmembrane component;; Ferric reductase NAD binding domain	Respiratory burst oxidase homolog protein E OS=Arabidopsis thaliana OX=3702 GN=RBOHE PE=2 SV=2	Respiratory burst oxidase-like protein E [Triticum urartu]	molecular function: catalytic activity (GO:0003824);; biological process: metabolic process (GO:0008152);; biological process: single-organism process (GO:0044699)	MAPK signaling pathway - plant (ko04016);; Plant-pathogen interaction (ko04626)
	Unigene_193236	RBOHH	--	--	--	8.68359e-06	8.04855	up	Respiratory burst NADPH oxidase;; EF hand;; EF-hand domain pair;; EF-hand domain;; EF hand	Respiratory burst oxidase homolog protein B OS=Solanum tuberosum OX=4113 GN=RBOHB PE=1 SV=1	unnamed protein product [Triticum turgidum subsp. durum]	molecular function: catalytic activity (GO:0003824);; molecular function: antioxidant activity (GO:0016209);; biological process: metabolic process (GO:0008152);; biological process: cellular process (GO:0009987);; biological process: single-organism process (GO:0044699);; biological process: response to stimulus (GO:0050896);; biological process: detoxification (GO:0098754);; molecular function:…	MAPK signaling pathway - plant (ko04016);; Plant-pathogen interaction (ko04626)
Alternative oxidase (AOX)	Unigene_178061	NDA1	--	--	--	6.55769e-07	7.02471	up	Pyridine nucleotide-disulphide oxidoreductase	Internal alternative NAD(P)H-ubiquinone oxidoreductase A1, mitochondrial OS=Arabidopsis thaliana OX=3702 GN=NDA1 PE=2 SV=1	internal alternative NAD(P)H-ubiquinone oxidoreductase A1, mitochondrial isoform X1 [Oryza sativa Japonica Group]	molecular function: catalytic activity (GO:0003824);; biological process: metabolic process (GO:0008152);; biological process: single-organism process (GO:0044699);; cellular component: cell (GO:0005623);; cellular component: cell part (GO:0044464);; cellular component: organelle (GO:0043226);; cellular component: organelle part (GO:0044422);; cellular component: membrane (GO:0016020);; cellular …	--
	Unigene_195173	NDA1	--	--	--	0.000435839	5.33434	up	Pyridine nucleotide-disulphide oxidoreductase;; Pyridine nucleotide-disulphide oxidoreductase;; Pyridine nucleotide-disulphide oxidoreductase	Internal alternative NAD(P)H-ubiquinone oxidoreductase A1, mitochondrial OS=Arabidopsis thaliana OX=3702 GN=NDA1 PE=2 SV=1	hypothetical protein CFC21_048619 [Triticum aestivum]	molecular function: catalytic activity (GO:0003824);; biological process: metabolic process (GO:0008152);; biological process: single-organism process (GO:0044699);; cellular component: cell (GO:0005623);; cellular component: cell part (GO:0044464);; cellular component: organelle (GO:0043226);; cellular component: organelle part (GO:0044422);; cellular component: membrane (GO:0016020);; cellular …	--
	Unigene_044779	NDB1	--	--	--	5.58628e-06	6.03014	up	Pyridine nucleotide-disulphide oxidoreductase;; Pyridine nucleotide-disulphide oxidoreductase;; EF hand;; EF-hand domain	External alternative NAD(P)H-ubiquinone oxidoreductase B1, mitochondrial OS=Solanum tuberosum OX=4113 GN=NDB1 PE=1 SV=1	external alternative NAD(P)H-ubiquinone oxidoreductase B1, mitochondrial [Brachypodium distachyon]	molecular function: catalytic activity (GO:0003824);; biological process: metabolic process (GO:0008152);; biological process: single-organism process (GO:0044699)	--
	Unigene_053286	NDB1	8.27467e-08	7.35212	up	3.27456e-09	6.69135	up	Pyridine nucleotide-disulphide oxidoreductase;; Pyridine nucleotide-disulphide oxidoreductase	External alternative NAD(P)H-ubiquinone oxidoreductase B3, mitochondrial OS=Arabidopsis thaliana OX=3702 GN=NDB3 PE=2 SV=1	External NADH-ubiquinone oxidoreductase 1, mitochondrial [Hordeum vulgare]	biological process: cellular process (GO:0009987);; biological process: developmental process (GO:0032502);; biological process: single-organism process (GO:0044699);; molecular function: catalytic activity (GO:0003824);; biological process: metabolic process (GO:0008152);; cellular component: cell (GO:0005623);; cellular component: cell part (GO:0044464);; cellular component: organelle (GO:00432…	--
	Unigene_074388	NDB2	--	--	--	1.21377e-05	6.88094	up	Pyridine nucleotide-disulphide oxidoreductase;; Pyridine nucleotide-disulphide oxidoreductase;; FAD-NAD(P)-binding;; Myb-like DNA-binding domain;; Myb-like DNA-binding domain	Alternative NAD(P)H-ubiquinone oxidoreductase C1, chloroplastic/mitochondrial OS=Arabidopsis thaliana OX=3702 GN=NDC1 PE=1 SV=2	unnamed protein product [Triticum turgidum subsp. durum]	molecular function: catalytic activity (GO:0003824);; cellular component: cell (GO:0005623);; cellular component: cell part (GO:0044464);; cellular component: organelle (GO:0043226);; biological process: metabolic process (GO:0008152);; biological process: cellular process (GO:0009987);; biological process: single-organism process (GO:0044699);; biological process: response to stimulus (GO:005089…	Ubiquinone and other terpenoid-quinone biosynthesis (ko00130)
	Unigene_017821	NDB2	0.00135708	3.93565	up	0.0634628	2.4789	normal	Pyridine nucleotide-disulphide oxidoreductase;; Pyridine nucleotide-disulphide oxidoreductase;; Pyridine nucleotide-disulphide oxidoreductase	External alternative NAD(P)H-ubiquinone oxidoreductase B2, mitochondrial OS=Arabidopsis thaliana OX=3702 GN=NDB2 PE=1 SV=1	predicted protein [Hordeum vulgare subsp. vulgare]	biological process: cellular process (GO:0009987);; biological process: developmental process (GO:0032502);; biological process: single-organism process (GO:0044699);; molecular function: catalytic activity (GO:0003824);; biological process: metabolic process (GO:0008152);; molecular function: binding (GO:0005488);; cellular component: cell (GO:0005623);; cellular component: cell part (GO:0044464…	--
	Unigene_071421	NDB3	--	--	--	4.20949e-08	8.18214	up	Pyridine nucleotide-disulphide oxidoreductase;; Pyridine nucleotide-disulphide oxidoreductase;; EF-hand domain;; EF hand	External alternative NAD(P)H-ubiquinone oxidoreductase B2, mitochondrial OS=Arabidopsis thaliana OX=3702 GN=NDB2 PE=1 SV=1	external alternative NAD(P)H-ubiquinone oxidoreductase B2, mitochondrial-like [Hordeum vulgare]	biological process: cellular process (GO:0009987);; biological process: developmental process (GO:0032502);; biological process: single-organism process (GO:0044699);; molecular function: catalytic activity (GO:0003824);; biological process: metabolic process (GO:0008152);; cellular component: cell (GO:0005623);; cellular component: cell part (GO:0044464);; cellular component: organelle (GO:00432…	--
	Unigene_316450	NDC1	2.26194e-08	6.61091	up	--	--	--	Pyridine nucleotide-disulphide oxidoreductase;; Pyridine nucleotide-disulphide oxidoreductase;; Pyridine nucleotide-disulphide oxidoreductase	Alternative NAD(P)H-ubiquinone oxidoreductase C1, chloroplastic/mitochondrial OS=Arabidopsis thaliana OX=3702 GN=NDC1 PE=1 SV=2	unnamed protein product [Triticum turgidum subsp. durum]	molecular function: catalytic activity (GO:0003824);; cellular component: cell (GO:0005623);; cellular component: cell part (GO:0044464);; cellular component: organelle (GO:0043226);; biological process: metabolic process (GO:0008152);; biological process: cellular process (GO:0009987);; biological process: single-organism process (GO:0044699);; biological process: response to stimulus (GO:005089…	Ubiquinone and other terpenoid-quinone biosynthesis (ko00130)
Mitogen-activated protein kinase (MAPK)	Unigene_522866	MPK5	0.000351264	-4.17436	down	0.0191897	-3.44204	normal	Protein kinase domain;; Protein tyrosine and serine/threonine kinase	Mitogen-activated protein kinase 5 OS=Oryza sativa subsp. indica OX=39946 GN=MPK5 PE=1 SV=2	MAP KINASE [Avena sativa]	biological process: metabolic process (GO:0008152);; biological process: cellular process (GO:0009987);; biological process: signaling (GO:0023052);; biological process: single-organism process (GO:0044699);; biological process: response to stimulus (GO:0050896);; biological process: biological regulation (GO:0065007);; molecular function: catalytic activity (GO:0003824);; molecular function: sig…	MAPK signaling pathway - plant (ko04016);; Plant-pathogen interaction (ko04626)
	Unigene_171045	MPK7	--	--	--	6.50909e-11	10.8931	up	--	Mitogen-activated protein kinase 7 OS=Oryza sativa subsp. japonica OX=39947 GN=MPK7 PE=2 SV=1	mitogen-activated protein kinase 7 [Brachypodium distachyon]	biological process: metabolic process (GO:0008152);; biological process: cellular process (GO:0009987);; biological process: signaling (GO:0023052);; biological process: single-organism process (GO:0044699);; biological process: response to stimulus (GO:0050896);; biological process: biological regulation (GO:0065007);; molecular function: catalytic activity (GO:0003824);; molecular function: sig…	--
	Unigene_603204	MPK7	0.00115561	-3.25542	down	0.000128968	-2.75675	down	Protein kinase domain;; Protein tyrosine and serine/threonine kinase;; Lipopolysaccharide kinase (Kdo/WaaP) family	Mitogen-activated protein kinase 7 OS=Oryza sativa subsp. japonica OX=39947 GN=MPK7 PE=2 SV=1	mitogen-activated protein kinase 7 [Brachypodium distachyon]	biological process: metabolic process (GO:0008152);; biological process: cellular process (GO:0009987);; biological process: signaling (GO:0023052);; biological process: single-organism process (GO:0044699);; biological process: response to stimulus (GO:0050896);; biological process: biological regulation (GO:0065007);; molecular function: catalytic activity (GO:0003824);; molecular function: sig…	MAPK signaling pathway - plant (ko04016);; Plant-pathogen interaction (ko04626)
	Unigene_074871	MPK8	--	--	--	4.46138e-10	10.7952	up	Protein kinase domain;; Protein tyrosine and serine/threonine kinase;; Lipopolysaccharide kinase (Kdo/WaaP) family	Mitogen-activated protein kinase 8 OS=Oryza sativa subsp. japonica OX=39947 GN=MPK8 PE=2 SV=2	mitogen-activated protein kinase 8 isoform X1 [Aegilops tauschii subsp. tauschii]	biological process: metabolic process (GO:0008152);; biological process: cellular process (GO:0009987);; biological process: signaling (GO:0023052);; biological process: single-organism process (GO:0044699);; biological process: response to stimulus (GO:0050896);; biological process: biological regulation (GO:0065007);; molecular function: catalytic activity (GO:0003824);; molecular function: sig…	MAPK signaling pathway - plant (ko04016);; Plant-pathogen interaction (ko04626)
	Unigene_316631	MPK8	--	--	--	2.33683e-09	10.2983	up	Protein kinase domain	Mitogen-activated protein kinase 8 OS=Oryza sativa subsp. japonica OX=39947 GN=MPK8 PE=2 SV=2	hypothetical protein CFC21_035705 [Triticum aestivum]	biological process: metabolic process (GO:0008152);; biological process: cellular process (GO:0009987);; biological process: signaling (GO:0023052);; biological process: single-organism process (GO:0044699);; biological process: response to stimulus (GO:0050896);; biological process: biological regulation (GO:0065007);; molecular function: catalytic activity (GO:0003824);; molecular function: sig…	--
	Unigene_508504	MPK8	0.00627267	-2.82535	down	1.62078e-06	-3.14451	down	Protein kinase domain;; Protein tyrosine and serine/threonine kinase;; Lipopolysaccharide kinase (Kdo/WaaP) family	Mitogen-activated protein kinase 8 OS=Oryza sativa subsp. japonica OX=39947 GN=MPK8 PE=2 SV=2	unnamed protein product [Triticum turgidum subsp. durum]	biological process: metabolic process (GO:0008152);; biological process: cellular process (GO:0009987);; biological process: signaling (GO:0023052);; biological process: single-organism process (GO:0044699);; biological process: response to stimulus (GO:0050896);; biological process: biological regulation (GO:0065007);; molecular function: catalytic activity (GO:0003824);; molecular function: sig…	MAPK signaling pathway - plant (ko04016);; Plant-pathogen interaction (ko04626)
	Unigene_317252	MPK9	0.00121905	3.78949	up	0.00440831	2.93971	up	--	Mitogen-activated protein kinase 9 OS=Oryza sativa subsp. japonica OX=39947 GN=MPK9 PE=3 SV=2	hypothetical protein BRADI_2g15317v3 [Brachypodium distachyon]	--	MAPK signaling pathway - plant (ko04016)
	Unigene_074949	MPK10	--	--	--	1.56018e-10	10.9196	up	--	Mitogen-activated protein kinase 10 OS=Oryza sativa subsp. japonica OX=39947 GN=MPK10 PE=2 SV=2	unnamed protein product [Triticum turgidum subsp. durum]	biological process: metabolic process (GO:0008152);; biological process: cellular process (GO:0009987);; biological process: signaling (GO:0023052);; biological process: single-organism process (GO:0044699);; biological process: response to stimulus (GO:0050896);; biological process: biological regulation (GO:0065007);; molecular function: catalytic activity (GO:0003824);; molecular function: sig…	MAPK signaling pathway - plant (ko04016)
	Unigene_313700	MPK10	--	--	--	4.59006e-06	7.02766	up	--	Mitogen-activated protein kinase 10 OS=Oryza sativa subsp. japonica OX=39947 GN=MPK10 PE=2 SV=2	unnamed protein product [Triticum turgidum subsp. durum]	biological process: metabolic process (GO:0008152);; biological process: cellular process (GO:0009987);; biological process: signaling (GO:0023052);; biological process: single-organism process (GO:0044699);; biological process: response to stimulus (GO:0050896);; biological process: biological regulation (GO:0065007);; molecular function: catalytic activity (GO:0003824);; molecular function: sig…	--
	Unigene_197989	MPK11	0.000934871	3.85993	up	0.000341865	3.18171	up	Protein kinase domain;; Protein tyrosine and serine/threonine kinase;; Lipopolysaccharide kinase (Kdo/WaaP) family	Mitogen-activated protein kinase 11 OS=Oryza sativa subsp. japonica OX=39947 GN=MPK11 PE=2 SV=2	hypothetical protein CFC21_098423 [Triticum aestivum]	biological process: metabolic process (GO:0008152);; biological process: cellular process (GO:0009987);; biological process: signaling (GO:0023052);; biological process: single-organism process (GO:0044699);; biological process: response to stimulus (GO:0050896);; biological process: biological regulation (GO:0065007);; molecular function: catalytic activity (GO:0003824);; molecular function: sig…	--
	Unigene_313814	MPK14	--	--	--	0.0024723	4.81891	up	--	Mitogen-activated protein kinase 14 OS=Oryza sativa subsp. japonica OX=39947 GN=MPK14 PE=2 SV=1	hypothetical protein CFC21_000956 [Triticum aestivum]	biological process: metabolic process (GO:0008152);; biological process: cellular process (GO:0009987);; biological process: signaling (GO:0023052);; biological process: single-organism process (GO:0044699);; biological process: response to stimulus (GO:0050896);; biological process: biological regulation (GO:0065007);; molecular function: catalytic activity (GO:0003824);; molecular function: sig…	--
	Unigene_194819	MKK9	3.83166e-05	-4.31933	down	3.44859e-07	-3.51758	down	Protein kinase domain;; Protein tyrosine and serine/threonine kinase	Mitogen-activated protein kinase kinase 9 OS=Arabidopsis thaliana OX=3702 GN=MKK9 PE=1 SV=1	hypothetical protein CFC21_051421 [Triticum aestivum]	biological process: reproduction (GO:0000003);; biological process: cellular process (GO:0009987);; biological process: signaling (GO:0023052);; biological process: single-organism process (GO:0044699);; biological process: response to stimulus (GO:0050896);; biological process: biological regulation (GO:0065007);; biological process: metabolic process (GO:0008152);; biological process: multi-org…	MAPK signaling pathway - plant (ko04016)
	Unigene_195942	MEKK1	0.00142574	4.1061	up	0.0328146	3.01039	normal	Protein kinase domain;; Protein tyrosine and serine/threonine kinase;; Kinase-like	Mitogen-activated protein kinase kinase kinase 1 OS=Arabidopsis thaliana OX=3702 GN=MEKK1 PE=1 SV=2	unnamed protein product [Triticum turgidum subsp. durum]	molecular function: catalytic activity (GO:0003824);; biological process: metabolic process (GO:0008152);; biological process: cellular process (GO:0009987);; molecular function: binding (GO:0005488)	MAPK signaling pathway - plant (ko04016);; Plant-pathogen interaction (ko04626)
	Unigene_074080	MAPKKK3	--	--	--	3.48973e-07	9.1812	up	Protein kinase domain;; Protein tyrosine and serine/threonine kinase;; Kinase-like	Mitogen-activated protein kinase kinase kinase 3 OS=Arabidopsis thaliana OX=3702 GN=MAPKKK3 PE=1 SV=1	unnamed protein product [Triticum turgidum subsp. durum]	biological process: metabolic process (GO:0008152);; biological process: cellular process (GO:0009987);; biological process: signaling (GO:0023052);; biological process: single-organism process (GO:0044699);; biological process: response to stimulus (GO:0050896);; biological process: biological regulation (GO:0065007);; molecular function: catalytic activity (GO:0003824);; molecular function: sig…	--
	Unigene_324751	MAPKKK3	--	--	--	6.45246e-09	10.0987	up	Protein kinase domain;; Protein tyrosine and serine/threonine kinase	Mitogen-activated protein kinase kinase kinase 3 OS=Arabidopsis thaliana OX=3702 GN=MAPKKK3 PE=1 SV=1	mitogen-activated protein kinase kinase kinase 3 isoform X1 [Brachypodium distachyon]	biological process: metabolic process (GO:0008152);; biological process: cellular process (GO:0009987);; biological process: signaling (GO:0023052);; biological process: single-organism process (GO:0044699);; biological process: response to stimulus (GO:0050896);; biological process: biological regulation (GO:0065007);; molecular function: catalytic activity (GO:0003824);; molecular function: sig…	--
	Unigene_065525	MAPKKK17	7.6562e-08	-5.44221	down	3.79818e-10	-4.6433	down	Protein kinase domain;; Protein tyrosine and serine/threonine kinase	Mitogen-activated protein kinase kinase kinase 17 OS=Arabidopsis thaliana OX=3702 GN=MAPKKK17 PE=1 SV=1	unnamed protein product [Triticum turgidum subsp. durum]	molecular function: catalytic activity (GO:0003824);; biological process: metabolic process (GO:0008152);; biological process: cellular process (GO:0009987);; molecular function: binding (GO:0005488)	MAPK signaling pathway - plant (ko04016)
	Unigene_514188	MAPKKK17	4.10034e-10	-6.29254	down	5.42843e-05	-4.47647	down	Protein kinase domain;; Protein tyrosine and serine/threonine kinase	Mitogen-activated protein kinase kinase kinase 17 OS=Arabidopsis thaliana OX=3702 GN=MAPKKK17 PE=1 SV=1	mitogen-activated protein kinase kinase kinase 18 [Brachypodium distachyon]	biological process: metabolic process (GO:0008152);; biological process: cellular process (GO:0009987);; biological process: signaling (GO:0023052);; biological process: single-organism process (GO:0044699);; biological process: response to stimulus (GO:0050896);; biological process: biological regulation (GO:0065007);; biological process: cellular component organization or biogenesis (GO:0071840…	MAPK signaling pathway - plant (ko04016)
	Unigene_604895	MAPKKK17	0.0270949	3.62655	normal	0.00403752	4.22448	up	Protein kinase domain;; Protein tyrosine and serine/threonine kinase	Mitogen-activated protein kinase kinase kinase 17 OS=Arabidopsis thaliana OX=3702 GN=MAPKKK17 PE=1 SV=1	mitogen-activated protein kinase kinase kinase 18 [Brachypodium distachyon]	biological process: metabolic process (GO:0008152);; biological process: cellular process (GO:0009987);; biological process: signaling (GO:0023052);; biological process: single-organism process (GO:0044699);; biological process: response to stimulus (GO:0050896);; biological process: biological regulation (GO:0065007);; biological process: cellular component organization or biogenesis (GO:0071840…	MAPK signaling pathway - plant (ko04016)
	Unigene_510194	MAPKKK18	1.15297e-05	-5.76299	down	0.000217164	-4.49963	down	Protein kinase domain;; Protein tyrosine and serine/threonine kinase	Mitogen-activated protein kinase kinase kinase 18 OS=Arabidopsis thaliana OX=3702 GN=MAPKKK18 PE=1 SV=1	hypothetical protein CFC21_047712 [Triticum aestivum]	biological process: metabolic process (GO:0008152);; biological process: cellular process (GO:0009987);; biological process: signaling (GO:0023052);; biological process: single-organism process (GO:0044699);; biological process: response to stimulus (GO:0050896);; biological process: biological regulation (GO:0065007);; biological process: cellular component organization or biogenesis (GO:0071840…	MAPK signaling pathway - plant (ko04016)
	Unigene_510366	MAPKKK18	9.87637e-07	-7.0938	down	1.92906e-06	-5.24187	down	Protein kinase domain;; Protein tyrosine and serine/threonine kinase	Mitogen-activated protein kinase kinase kinase 18 OS=Arabidopsis thaliana OX=3702 GN=MAPKKK18 PE=1 SV=1	mitogen-activated protein kinase kinase kinase NPK1-like [Aegilops tauschii subsp. tauschii]	biological process: metabolic process (GO:0008152);; biological process: cellular process (GO:0009987);; biological process: signaling (GO:0023052);; biological process: single-organism process (GO:0044699);; biological process: response to stimulus (GO:0050896);; biological process: biological regulation (GO:0065007);; biological process: cellular component organization or biogenesis (GO:0071840…	MAPK signaling pathway - plant (ko04016)

## Sheet: Leaves
Gene classification	ID	Gene name	L0_vs_L3_DESeq2_FDR	L0_vs_L3_DESeq2_log2FC	L0_vs_L3_regulated	L0_vs_L2_DESeq2_FDR	L0_vs_L6_DESeq2_log2FC	L0_vs_L6_regulated	Pfam_annotation	Swissprot_annotation	nr_annotation	GO_second_level_annotation	KEGG_pathway_annotation
Superoxide dismutase (SOD)	Unigene_603370	Os06g0115400	0.0267333	-1.83717	normal	3.49e-18	-4.45522	down	Iron/manganese superoxide dismutases, C-terminal domain;; Iron/manganese superoxide dismutases, alpha-hairpin domain	Superoxide dismutase [Fe] 1, chloroplastic OS=Oryza sativa subsp. japonica OX=39947 GN=Os06g0115400 PE=2 SV=1	Superoxide dismutase [Hordeum vulgare]	biological process: response to stimulus (GO:0050896);; molecular function: catalytic activity (GO:0003824);; molecular function: antioxidant activity (GO:0016209);; biological process: metabolic process (GO:0008152);; biological process: cellular process (GO:0009987);; biological process: single-organism process (GO:0044699);; biological process: detoxification (GO:0098754);; cellular component:…	Peroxisome (ko04146)
	Unigene_007693	SODCC.2	0.0077513	-1.92113	down	0.000886854	-1.60626	down	Copper/zinc superoxide dismutase (SODC)	Superoxide dismutase [Cu-Zn] 2 OS=Mesembryanthemum crystallinum OX=3544 GN=SODCC.2 PE=2 SV=1	hypothetical protein CFC21_051456 [Triticum aestivum]	biological process: response to stimulus (GO:0050896);; molecular function: catalytic activity (GO:0003824);; molecular function: antioxidant activity (GO:0016209);; biological process: metabolic process (GO:0008152);; biological process: cellular process (GO:0009987);; biological process: single-organism process (GO:0044699);; biological process: detoxification (GO:0098754);; molecular function:…	Peroxisome (ko04146)
Catalase (CAT)	Unigene_179531	CAT1	0.0373862	0.603195	normal	0.00078145	1.58101	up	Catalase-related immune-responsive	Catalase-1 OS=Triticum aestivum OX=4565 GN=CAT1 PE=2 SV=1	hypothetical protein CFC21_063250 [Triticum aestivum]	biological process: response to stimulus (GO:0050896);; molecular function: catalytic activity (GO:0003824);; molecular function: antioxidant activity (GO:0016209);; biological process: metabolic process (GO:0008152);; biological process: cellular process (GO:0009987);; biological process: single-organism process (GO:0044699);; biological process: detoxification (GO:0098754);; cellular component:…	Tryptophan metabolism (ko00380);; Glyoxylate and dicarboxylate metabolism (ko00630);; Carbon metabolism (ko01200);; MAPK signaling pathway - plant (ko04016);; Peroxisome (ko04146)
	Unigene_529766	CAT2	5.61e-05	-2.96421	down	6.14e-09	-5.34532	down	Catalase;; Catalase-related immune-responsive	Catalase isozyme 2 OS=Hordeum vulgare OX=4513 GN=CAT2 PE=2 SV=1	hypothetical protein CFC21_081776 [Triticum aestivum]	biological process: response to stimulus (GO:0050896);; molecular function: catalytic activity (GO:0003824);; molecular function: antioxidant activity (GO:0016209);; biological process: metabolic process (GO:0008152);; biological process: cellular process (GO:0009987);; biological process: single-organism process (GO:0044699);; biological process: detoxification (GO:0098754);; molecular function:…	Tryptophan metabolism (ko00380);; Glyoxylate and dicarboxylate metabolism (ko00630);; Carbon metabolism (ko01200);; MAPK signaling pathway - plant (ko04016);; Peroxisome (ko04146)
	Unigene_194400	CAT2	7.87e-05	-2.81645	down	4.11e-10	-5.29226	down	Catalase;; Catalase-related immune-responsive	Catalase isozyme 2 OS=Hordeum vulgare OX=4513 GN=CAT2 PE=2 SV=1	hypothetical protein CFC21_081776 [Triticum aestivum]	biological process: response to stimulus (GO:0050896);; molecular function: catalytic activity (GO:0003824);; molecular function: antioxidant activity (GO:0016209);; biological process: metabolic process (GO:0008152);; biological process: cellular process (GO:0009987);; biological process: single-organism process (GO:0044699);; biological process: detoxification (GO:0098754);; molecular function:…	Tryptophan metabolism (ko00380);; Glyoxylate and dicarboxylate metabolism (ko00630);; Carbon metabolism (ko01200);; MAPK signaling pathway - plant (ko04016);; Peroxisome (ko04146)
Peroxidases (POD)	Unigene_066727	——	0.00133423	-2.7271	down	0.000912924	-4.78356	down	Peroxidase	Peroxidase OS=Triticum aestivum OX=4565 PE=2 SV=1	predicted protein [Hordeum vulgare subsp. vulgare]	molecular function: catalytic activity (GO:0003824);; molecular function: antioxidant activity (GO:0016209);; biological process: metabolic process (GO:0008152);; biological process: cellular process (GO:0009987);; biological process: single-organism process (GO:0044699);; biological process: response to stimulus (GO:0050896);; biological process: detoxification (GO:0098754);; molecular function:…	Phenylpropanoid biosynthesis (ko00940)
	Unigene_066962	GSVIVT00037159001	0.00607313	-3.03574	down	2.68e-08	-9.05906	down	Peroxidase	Peroxidase 5 OS=Vitis vinifera OX=29760 GN=GSVIVT00037159001 PE=1 SV=2	hypothetical protein CFC21_005617 [Triticum aestivum]	molecular function: catalytic activity (GO:0003824);; molecular function: antioxidant activity (GO:0016209);; biological process: metabolic process (GO:0008152);; biological process: cellular process (GO:0009987);; biological process: single-organism process (GO:0044699);; biological process: response to stimulus (GO:0050896);; biological process: detoxification (GO:0098754);; molecular function:…	Phenylpropanoid biosynthesis (ko00940)
	Unigene_178717	PER16	0.0139817	2.29481	normal	3.53e-15	3.91477	up	Peroxidase	Peroxidase 16 OS=Arabidopsis thaliana OX=3702 GN=PER16 PE=1 SV=2	class III peroxidase 90 precursor [Hordeum vulgare]	molecular function: catalytic activity (GO:0003824);; molecular function: antioxidant activity (GO:0016209);; biological process: metabolic process (GO:0008152);; biological process: cellular process (GO:0009987);; biological process: single-organism process (GO:0044699);; biological process: response to stimulus (GO:0050896);; biological process: detoxification (GO:0098754);; molecular function:…	Phenylpropanoid biosynthesis (ko00940)
	Unigene_596069	PER16	0.131744	1.20035	normal	0.00874855	1.64161	up	Peroxidase	Peroxidase 16 OS=Arabidopsis thaliana OX=3702 GN=PER16 PE=1 SV=2	peroxidase 16-like [Aegilops tauschii subsp. tauschii]	molecular function: catalytic activity (GO:0003824);; molecular function: antioxidant activity (GO:0016209);; biological process: metabolic process (GO:0008152);; biological process: cellular process (GO:0009987);; biological process: single-organism process (GO:0044699);; biological process: response to stimulus (GO:0050896);; biological process: detoxification (GO:0098754);; molecular function:…	Phenylpropanoid biosynthesis (ko00940)
	Unigene_510657	PER51	0.00369691	-2.608	down	0.00048826	-3.47108	down	Peroxidase	Peroxidase 51 OS=Arabidopsis thaliana OX=3702 GN=PER51 PE=2 SV=1	unnamed protein product [Triticum turgidum subsp. durum]	molecular function: catalytic activity (GO:0003824);; molecular function: antioxidant activity (GO:0016209);; biological process: metabolic process (GO:0008152);; biological process: cellular process (GO:0009987);; biological process: single-organism process (GO:0044699);; biological process: response to stimulus (GO:0050896);; biological process: detoxification (GO:0098754);; molecular function:…	Phenylpropanoid biosynthesis (ko00940)
	Unigene_521452	PER52	3.23e-12	-4.9312	down	6.93e-17	-11.6135	down	Peroxidase	Peroxidase 52 OS=Arabidopsis thaliana OX=3702 GN=PER52 PE=2 SV=1	hypothetical protein CFC21_110180 [Triticum aestivum]	molecular function: catalytic activity (GO:0003824);; molecular function: antioxidant activity (GO:0016209);; biological process: metabolic process (GO:0008152);; biological process: cellular process (GO:0009987);; biological process: single-organism process (GO:0044699);; biological process: response to stimulus (GO:0050896);; biological process: detoxification (GO:0098754);; molecular function:…	Phenylpropanoid biosynthesis (ko00940)
	Unigene_007012	PER52	0.000247165	3.49621	up	0.000139636	4.08126	up	Peroxidase	Peroxidase 52 OS=Arabidopsis thaliana OX=3702 GN=PER52 PE=2 SV=1	peroxidase P7 [Brachypodium distachyon]	molecular function: catalytic activity (GO:0003824);; molecular function: antioxidant activity (GO:0016209);; biological process: metabolic process (GO:0008152);; biological process: cellular process (GO:0009987);; biological process: single-organism process (GO:0044699);; biological process: response to stimulus (GO:0050896);; biological process: detoxification (GO:0098754);; molecular function:…	Phenylpropanoid biosynthesis (ko00940)
	Unigene_186426	PER56	0.0455262	1.78587	normal	4.86e-05	2.75378	up	Peroxidase	Peroxidase 56 OS=Arabidopsis thaliana OX=3702 GN=PER56 PE=2 SV=1	Peroxidase 56 [Hordeum vulgare]	molecular function: catalytic activity (GO:0003824);; molecular function: antioxidant activity (GO:0016209);; biological process: metabolic process (GO:0008152);; biological process: cellular process (GO:0009987);; biological process: single-organism process (GO:0044699);; biological process: response to stimulus (GO:0050896);; biological process: detoxification (GO:0098754);; molecular function:…	Phenylpropanoid biosynthesis (ko00940)
	Unigene_018270	PER70	1.39e-06	-3.15549	down	1e-10	-3.47404	down	Peroxidase	Peroxidase 70 OS=Zea mays OX=4577 GN=PER70 PE=1 SV=1	hypothetical protein CFC21_110180 [Triticum aestivum]	molecular function: catalytic activity (GO:0003824);; molecular function: antioxidant activity (GO:0016209);; biological process: metabolic process (GO:0008152);; biological process: cellular process (GO:0009987);; biological process: single-organism process (GO:0044699);; biological process: response to stimulus (GO:0050896);; biological process: detoxification (GO:0098754);; molecular function:…	Phenylpropanoid biosynthesis (ko00940)
	Unigene_179098	PER70	5.39e-06	-4.2532	down	5.41e-11	-8.43094	down	Peroxidase	Peroxidase 70 OS=Zea mays OX=4577 GN=PER70 PE=1 SV=1	hypothetical protein CFC21_091210 [Triticum aestivum]	molecular function: catalytic activity (GO:0003824);; molecular function: antioxidant activity (GO:0016209);; biological process: metabolic process (GO:0008152);; biological process: cellular process (GO:0009987);; biological process: single-organism process (GO:0044699);; biological process: response to stimulus (GO:0050896);; biological process: detoxification (GO:0098754);; molecular function:…	Phenylpropanoid biosynthesis (ko00940)
Glutathione S-transferase (GST)	Unigene_171481	——	--	--	--	0.00113985	-5.78147	down	Glutathione S-transferase, N-terminal domain;; Glutathione S-transferase, N-terminal domain;; Glutathione S-transferase, N-terminal domain	Probable glutathione S-transferase OS=Nicotiana tabacum OX=4097 PE=2 SV=1	unnamed protein product [Triticum turgidum subsp. durum]	molecular function: binding (GO:0005488)	Glutathione metabolism (ko00480)
	Unigene_319876	GST1	1.11e-08	4.18525	up	4.38e-18	5.83235	up	Glutathione S-transferase, C-terminal domain;; Glutathione S-transferase, C-terminal domain;; Glutathione S-transferase, C-terminal domain;; Glutathione S-transferase, N-terminal domain;; Glutathione S-transferase, N-terminal domain	Glutathione S-transferase 1 OS=Zea mays OX=4577 GN=GST1 PE=1 SV=4	unnamed protein product [Triticum turgidum subsp. durum]	molecular function: binding (GO:0005488)	Glutathione metabolism (ko00480)
	Unigene_588597	GST1	0.00967325	-2.42004	down	2.62e-10	-5.86013	down	Glutathione S-transferase, N-terminal domain;; Glutathione S-transferase, C-terminal domain;; Glutathione S-transferase, N-terminal domain;; Glutathione S-transferase, N-terminal domain;; Glutathione S-transferase, C-terminal domain	Glutathione S-transferase 1 OS=Zea mays OX=4577 GN=GST1 PE=1 SV=4	glutathione S-transferase 1 [Brachypodium distachyon]	biological process: response to stimulus (GO:0050896);; molecular function: catalytic activity (GO:0003824);; molecular function: binding (GO:0005488);; cellular component: cell (GO:0005623);; cellular component: cell part (GO:0044464);; biological process: metabolic process (GO:0008152);; biological process: cellular process (GO:0009987);; cellular component: macromolecular complex (GO:0032991)	Glutathione metabolism (ko00480)
	Unigene_164615	GST4	4.68e-05	3.0088	up	3.02e-10	4.62824	up	Glutathione S-transferase, C-terminal domain;; Glutathione S-transferase, C-terminal domain;; Glutathione S-transferase, C-terminal domain;; Glutathione S-transferase, N-terminal domain;; Glutathione S-transferase, N-terminal domain	Glutathione S-transferase 4 OS=Zea mays OX=4577 GN=GST4 PE=1 SV=2	glutathione S-transferase 4-like [Aegilops tauschii subsp. tauschii]	molecular function: binding (GO:0005488)	Glutathione metabolism (ko00480)
	Unigene_186890	GST4	0.0167236	1.96921	normal	1.55e-05	3.16536	up	Glutathione S-transferase, C-terminal domain;; Glutathione S-transferase, C-terminal domain;; Glutathione S-transferase, C-terminal domain;; Glutathione S-transferase, N-terminal domain;; Glutathione S-transferase, N-terminal domain	Glutathione S-transferase 4 OS=Zea mays OX=4577 GN=GST4 PE=1 SV=2	glutathione S-transferase 4-like [Aegilops tauschii subsp. tauschii]	molecular function: binding (GO:0005488)	Glutathione metabolism (ko00480)
	Unigene_308188	GSTA1	0.0406573	1.44753	normal	1.39e-11	3.06555	up	Glutathione S-transferase, N-terminal domain;; Glutathione S-transferase, C-terminal domain;; Glutathione S-transferase, N-terminal domain;; Glutathione S-transferase, C-terminal domain;; Glutathione S-transferase, N-terminal domain;; Glutathione S-transferase, C-terminal domain	Glutathione S-transferase 1 OS=Triticum aestivum OX=4565 GN=GSTA1 PE=2 SV=1	hypothetical protein CFC21_056549 [Triticum aestivum]	molecular function: binding (GO:0005488)	Glutathione metabolism (ko00480)
	Unigene_500887	GSTF1	0.00951908	2.28628	up	3.82e-06	3.59383	up	Glutathione S-transferase, C-terminal domain;; Glutathione S-transferase, C-terminal domain;; Glutathione S-transferase, C-terminal domain	Probable glutathione S-transferase GSTF1 OS=Oryza sativa subsp. japonica OX=39947 GN=GSTF1 PE=1 SV=2	glutathione S-transferase [Alopecurus japonicus]	--	Glutathione metabolism (ko00480)
	Unigene_510653	GSTF1	0.00692131	-2.40504	down	1.9e-10	-5.74087	down	Glutathione S-transferase, N-terminal domain;; Glutathione S-transferase, N-terminal domain;; Glutathione S-transferase, N-terminal domain;; Glutathione S-transferase, C-terminal domain;; Glutathione S-transferase, C-terminal domain;; Glutathione S-transferase, C-terminal domain	Probable glutathione S-transferase GSTF1 OS=Oryza sativa subsp. japonica OX=39947 GN=GSTF1 PE=1 SV=2	hypothetical protein CFC21_073927 [Triticum aestivum]	molecular function: binding (GO:0005488)	Glutathione metabolism (ko00480)
	Unigene_589942	GSTF1	7.77e-05	2.30665	up	3.42e-13	3.13891	up	Glutathione S-transferase, N-terminal domain;; Glutathione S-transferase, C-terminal domain;; Glutathione S-transferase, N-terminal domain;; Glutathione S-transferase, C-terminal domain;; Glutathione S-transferase, C-terminal domain;; Glutathione S-transferase, N-terminal domain	Probable glutathione S-transferase GSTF1 OS=Oryza sativa subsp. japonica OX=39947 GN=GSTF1 PE=1 SV=2	glutathione transferase [Alopecurus myosuroides]	molecular function: binding (GO:0005488)	Glutathione metabolism (ko00480)
	Unigene_038042	GSTF11	0.000386053	-2.62543	down	2.5e-27	-4.53582	down	Glutathione S-transferase, N-terminal domain;; Glutathione S-transferase, N-terminal domain;; Glutathione S-transferase, C-terminal domain;; Glutathione S-transferase, N-terminal domain;; Glutathione S-transferase, C-terminal domain;; Glutathione S-transferase, C-terminal domain	Glutathione S-transferase F11 OS=Arabidopsis thaliana OX=3702 GN=GSTF11 PE=2 SV=1	glutathione S-transferase F11 [Brachypodium distachyon]	molecular function: binding (GO:0005488)	Glutathione metabolism (ko00480)
	Unigene_310850	GSTU1	0.0072631	2.15928	up	2.2e-05	2.66158	up	Glutathione S-transferase, N-terminal domain;; Glutathione S-transferase, N-terminal domain;; Glutathione S-transferase, N-terminal domain;; Glutathione S-transferase, C-terminal domain;; Glutathione S-transferase, C-terminal domain	Probable glutathione S-transferase GSTU1 OS=Oryza sativa subsp. japonica OX=39947 GN=GSTU1 PE=1 SV=1	GST [Lolium perenne]	biological process: response to stimulus (GO:0050896);; molecular function: catalytic activity (GO:0003824);; molecular function: binding (GO:0005488);; cellular component: extracellular region (GO:0005576);; cellular component: cell (GO:0005623);; cellular component: cell part (GO:0044464);; cellular component: organelle (GO:0043226);; cellular component: membrane (GO:0016020);; cellular compone…	Glutathione metabolism (ko00480)
	Unigene_319114	GSTU15	0.00880947	3.44013	up	1.72e-05	5.11934	up	zinc-binding in reverse transcriptase;; Glutathione S-transferase, C-terminal domain	Glutathione S-transferase U15 OS=Arabidopsis thaliana OX=3702 GN=GSTU15 PE=2 SV=1	hypothetical protein EJB05_19054, partial [Eragrostis curvula]	biological process: cellular process (GO:0009987);; biological process: developmental process (GO:0032502);; biological process: single-organism process (GO:0044699);; biological process: cellular component organization or biogenesis (GO:0071840);; molecular function: catalytic activity (GO:0003824);; molecular function: binding (GO:0005488);; cellular component: cell (GO:0005623);; cellular comp…	Glutathione metabolism (ko00480)
	Unigene_056413	GSTU6	4.81e-08	6.59226	up	2.47e-07	8.26965	up	Glutathione S-transferase, C-terminal domain;; Glutathione S-transferase, N-terminal domain;; Glutathione S-transferase, N-terminal domain;; Glutathione S-transferase, C-terminal domain	Probable glutathione S-transferase GSTU6 OS=Oryza sativa subsp. japonica OX=39947 GN=GSTU6 PE=2 SV=2	probable glutathione S-transferase GSTU6 [Aegilops tauschii subsp. tauschii]	molecular function: binding (GO:0005488)	Glutathione metabolism (ko00480)
	Unigene_074410	GSTU6	2.86e-06	5.07817	up	3.43e-21	7.83019	up	Glutathione S-transferase, N-terminal domain;; Glutathione S-transferase, N-terminal domain;; Glutathione S-transferase, N-terminal domain;; Glutathione S-transferase, C-terminal domain;; Glutathione S-transferase, C-terminal domain	Probable glutathione S-transferase GSTU6 OS=Oryza sativa subsp. japonica OX=39947 GN=GSTU6 PE=2 SV=2	hypothetical protein CFC21_062304 [Triticum aestivum]	molecular function: binding (GO:0005488)	Glutathione metabolism (ko00480)
	Unigene_171482	GSTU6	7.97e-31	8.86404	up	2.47e-39	10.1026	up	Glutathione S-transferase, N-terminal domain;; Glutathione S-transferase, N-terminal domain;; Glutathione S-transferase, N-terminal domain;; Glutathione S-transferase, C-terminal domain;; Glutathione S-transferase, C-terminal domain	Probable glutathione S-transferase GSTU6 OS=Oryza sativa subsp. japonica OX=39947 GN=GSTU6 PE=2 SV=2	glutathione transferase [Alopecurus myosuroides]	molecular function: binding (GO:0005488)	Glutathione metabolism (ko00480)
	Unigene_172809	GSTU6	3.53e-08	3.26298	up	6.1e-33	5.15853	up	Glutathione S-transferase, N-terminal domain;; Glutathione S-transferase, N-terminal domain;; Glutathione S-transferase, N-terminal domain;; Glutathione S-transferase, C-terminal domain;; Glutathione S-transferase, C-terminal domain	Probable glutathione S-transferase GSTU6 OS=Oryza sativa subsp. japonica OX=39947 GN=GSTU6 PE=2 SV=2	glutathione s-transferase U2 [Alopecurus myosuroides]	molecular function: binding (GO:0005488)	Glutathione metabolism (ko00480)
	Unigene_175654	GSTU6	6.37e-17	-4.93442	down	8.47e-12	-6.12115	down	Glutathione S-transferase, N-terminal domain;; Glutathione S-transferase, N-terminal domain;; Glutathione S-transferase, N-terminal domain;; Glutathione S-transferase, C-terminal domain;; Glutathione S-transferase, C-terminal domain	Probable glutathione S-transferase GSTU6 OS=Oryza sativa subsp. japonica OX=39947 GN=GSTU6 PE=2 SV=2	hypothetical protein CFC21_019488 [Triticum aestivum]	molecular function: binding (GO:0005488)	Glutathione metabolism (ko00480)
	Unigene_181822	GSTU6	0.0126829	2.49719	normal	0.000349244	3.25229	up	Glutathione S-transferase, C-terminal domain;; Glutathione S-transferase, C-terminal domain	Probable glutathione S-transferase GSTU6 OS=Oryza sativa subsp. japonica OX=39947 GN=GSTU6 PE=2 SV=2	probable glutathione S-transferase GSTU6 isoform X1 [Aegilops tauschii subsp. tauschii]	--	Glutathione metabolism (ko00480)
	Unigene_186269	GSTU6	0.00015152	3.23961	up	1.67e-08	3.98356	up	Glutathione S-transferase, N-terminal domain;; Glutathione S-transferase, N-terminal domain;; Glutathione S-transferase, C-terminal domain	Probable glutathione S-transferase GSTU6 OS=Oryza sativa subsp. japonica OX=39947 GN=GSTU6 PE=2 SV=2	unnamed protein product [Triticum turgidum subsp. durum]	molecular function: binding (GO:0005488)	Glutathione metabolism (ko00480)
	Unigene_188320	GSTU6	3.75e-16	6.14181	up	2.86e-19	6.94837	up	Glutathione S-transferase, N-terminal domain;; Glutathione S-transferase, N-terminal domain;; Glutathione S-transferase, C-terminal domain;; Glutathione S-transferase, N-terminal domain;; Glutathione S-transferase N-terminal domain;; Glutathione S-transferase, C-terminal domain	Probable glutathione S-transferase GSTU6 OS=Oryza sativa subsp. japonica OX=39947 GN=GSTU6 PE=2 SV=2	glutathione transferase [Alopecurus myosuroides]	molecular function: binding (GO:0005488)	Glutathione metabolism (ko00480)
	Unigene_301194	GSTU6	0.000120746	3.97927	up	2.13e-05	4.95744	up	Glutathione S-transferase, C-terminal domain	Probable glutathione S-transferase GSTU6 OS=Oryza sativa subsp. japonica OX=39947 GN=GSTU6 PE=2 SV=2	putative glutathione S-transferase GSTU6 [Dichanthelium oligosanthes]	--	Glutathione metabolism (ko00480)
	Unigene_309225	GSTU6	0.00117178	2.38387	up	1.48e-05	2.9532	up	Glutathione S-transferase, N-terminal domain;; Glutathione S-transferase, N-terminal domain;; Glutathione S-transferase, N-terminal domain;; Glutathione S-transferase, C-terminal domain	Probable glutathione S-transferase GSTU6 OS=Oryza sativa subsp. japonica OX=39947 GN=GSTU6 PE=2 SV=2	unnamed protein product [Triticum turgidum subsp. durum]	molecular function: binding (GO:0005488)	Glutathione metabolism (ko00480)
	Unigene_311027	GSTU6	4.25e-05	2.96811	up	9.75e-19	4.61588	up	Glutathione S-transferase, N-terminal domain;; Glutathione S-transferase, N-terminal domain;; Glutathione S-transferase, N-terminal domain;; Glutathione S-transferase, C-terminal domain;; Glutathione S-transferase, C-terminal domain	Probable glutathione S-transferase GSTU6 OS=Oryza sativa subsp. japonica OX=39947 GN=GSTU6 PE=2 SV=2	hypothetical protein CFC21_062304 [Triticum aestivum]	molecular function: binding (GO:0005488)	Glutathione metabolism (ko00480)
	Unigene_317060	GSTU6	0.00366692	2.66829	up	1.06e-11	4.69802	up	Glutathione S-transferase, C-terminal domain;; Glutathione S-transferase, C-terminal domain;; Glutathione S-transferase, N-terminal domain;; Glutathione S-transferase, N-terminal domain;; Glutathione S-transferase, N-terminal domain	Probable glutathione S-transferase GSTU6 OS=Oryza sativa subsp. japonica OX=39947 GN=GSTU6 PE=2 SV=2	Os10g0528651 [Oryza sativa Japonica Group]	molecular function: binding (GO:0005488)	Glutathione metabolism (ko00480)
	Unigene_501903	GSTU6	1.43e-40	-11.3817	down	1.07e-09	-7.57943	down	Glutathione S-transferase, N-terminal domain;; Glutathione S-transferase, N-terminal domain;; Glutathione S-transferase, N-terminal domain;; Glutathione S-transferase, C-terminal domain	Probable glutathione S-transferase GSTU6 OS=Oryza sativa subsp. japonica OX=39947 GN=GSTU6 PE=2 SV=2	unnamed protein product [Triticum turgidum subsp. durum]	molecular function: binding (GO:0005488)	Glutathione metabolism (ko00480)
	Unigene_517118	GSTU6	1.39e-06	5.25179	up	5.93e-11	7.01474	up	Glutathione S-transferase, N-terminal domain;; Glutathione S-transferase, N-terminal domain;; Glutathione S-transferase, N-terminal domain	Probable glutathione S-transferase GSTU6 OS=Oryza sativa subsp. japonica OX=39947 GN=GSTU6 PE=2 SV=2	glutathione transferase [Hordeum vulgare]	molecular function: binding (GO:0005488)	Glutathione metabolism (ko00480)
	Unigene_047549	GSTU6	0.000923847	-3.59124	down	5.72e-07	-8.15455	down	Glutathione S-transferase, C-terminal domain;; Glutathione S-transferase, C-terminal domain	Probable glutathione S-transferase GSTU6 OS=Oryza sativa subsp. japonica OX=39947 GN=GSTU6 PE=2 SV=2	glutathione S-transferase GSTU6 [Zea mays]	--	Glutathione metabolism (ko00480)
	Unigene_190648	GSTF11	0.000237169	-2.52938	down	2.26e-12	-5.69691	down	Glutathione S-transferase, N-terminal domain;; Glutathione S-transferase, N-terminal domain;; Glutathione S-transferase, C-terminal domain;; Glutathione S-transferase, N-terminal domain;; Glutathione S-transferase, C-terminal domain;; Glutathione S-transferase, C-terminal domain;; BED zinc finger	Glutathione S-transferase F11 OS=Arabidopsis thaliana OX=3702 GN=GSTF11 PE=2 SV=1	glutathione S-transferase F11 [Brachypodium distachyon]	molecular function: binding (GO:0005488)	Glutathione metabolism (ko00480)
Monodehydroascorbate reductase (MDAR)	Unigene_070387	MDAR2	0.023515	-1.52598	normal	8.61e-05	-1.7731	down	Pyridine nucleotide-disulphide oxidoreductase;; Pyridine nucleotide-disulphide oxidoreductase;; Pyridine nucleotide-disulphide oxidoreductase	Monodehydroascorbate reductase 2, peroxisomal OS=Oryza sativa subsp. japonica OX=39947 GN=MDAR2 PE=2 SV=1	predicted protein [Hordeum vulgare subsp. vulgare]	molecular function: catalytic activity (GO:0003824);; cellular component: cell (GO:0005623);; cellular component: cell part (GO:0044464);; cellular component: organelle (GO:0043226);; cellular component: membrane (GO:0016020);; cellular component: organelle part (GO:0044422);; biological process: response to stimulus (GO:0050896);; biological process: metabolic process (GO:0008152);; biological p…	Ascorbate and aldarate metabolism (ko00053)
	Unigene_196825	MDAR2	0.0446174	-1.08565	normal	3.58e-09	-2.30088	down	Pyridine nucleotide-disulphide oxidoreductase;; Pyridine nucleotide-disulphide oxidoreductase	Monodehydroascorbate reductase 2, peroxisomal OS=Oryza sativa subsp. japonica OX=39947 GN=MDAR2 PE=2 SV=1	predicted protein [Hordeum vulgare subsp. vulgare]	molecular function: catalytic activity (GO:0003824);; cellular component: cell (GO:0005623);; cellular component: cell part (GO:0044464);; cellular component: organelle (GO:0043226);; cellular component: membrane (GO:0016020);; cellular component: organelle part (GO:0044422);; biological process: response to stimulus (GO:0050896);; biological process: metabolic process (GO:0008152);; biological p…	Ascorbate and aldarate metabolism (ko00053)
	Unigene_520088	MDAR2	0.0522163	-1.18538	normal	0.00100538	-2.28846	down	Pyridine nucleotide-disulphide oxidoreductase;; Pyridine nucleotide-disulphide oxidoreductase;; Pyridine nucleotide-disulphide oxidoreductase	Monodehydroascorbate reductase 2, peroxisomal OS=Oryza sativa subsp. japonica OX=39947 GN=MDAR2 PE=2 SV=1	monodehydroascorbate reductase 4, peroxisomal-like [Aegilops tauschii subsp. tauschii]	molecular function: catalytic activity (GO:0003824);; cellular component: cell (GO:0005623);; cellular component: cell part (GO:0044464);; cellular component: organelle (GO:0043226);; cellular component: membrane (GO:0016020);; cellular component: organelle part (GO:0044422);; biological process: response to stimulus (GO:0050896);; biological process: metabolic process (GO:0008152);; biological p…	Ascorbate and aldarate metabolism (ko00053)
	Unigene_002528	MDAR3	0.000599561	1.92389	up	6.75e-24	3.17081	up	Pyridine nucleotide-disulphide oxidoreductase;; Pyridine nucleotide-disulphide oxidoreductase	Monodehydroascorbate reductase 3, cytosolic OS=Oryza sativa subsp. japonica OX=39947 GN=MDAR3 PE=1 SV=1	monodehydroasorbate reductase [Hordeum vulgare]	biological process: response to stimulus (GO:0050896);; molecular function: catalytic activity (GO:0003824);; cellular component: cell (GO:0005623);; cellular component: cell part (GO:0044464);; cellular component: organelle (GO:0043226);; cellular component: membrane (GO:0016020);; cellular component: organelle part (GO:0044422);; biological process: metabolic process (GO:0008152);; biological p…	Ascorbate and aldarate metabolism (ko00053)
	Unigene_062488	MDAR3	0.0636979	1.24031	normal	0.000478012	1.38334	up	Pyridine nucleotide-disulphide oxidoreductase;; Pyridine nucleotide-disulphide oxidoreductase;; Tryptophan halogenase	Monodehydroascorbate reductase 3, cytosolic OS=Oryza sativa subsp. japonica OX=39947 GN=MDAR3 PE=1 SV=1	monodehydroascorbate reductase [Deschampsia antarctica]	biological process: response to stimulus (GO:0050896);; molecular function: catalytic activity (GO:0003824);; cellular component: cell (GO:0005623);; cellular component: cell part (GO:0044464);; cellular component: organelle (GO:0043226);; cellular component: membrane (GO:0016020);; cellular component: organelle part (GO:0044422);; biological process: metabolic process (GO:0008152);; biological p…	Ascorbate and aldarate metabolism (ko00053)
	Unigene_070442	MDAR3	0.00112504	2.58788	up	1.04e-17	4.537	up	Pyridine nucleotide-disulphide oxidoreductase;; Pyridine nucleotide-disulphide oxidoreductase	Monodehydroascorbate reductase 3, cytosolic OS=Oryza sativa subsp. japonica OX=39947 GN=MDAR3 PE=1 SV=1	monodehydroasorbate reductase [Hordeum vulgare]	biological process: response to stimulus (GO:0050896);; molecular function: catalytic activity (GO:0003824);; cellular component: cell (GO:0005623);; cellular component: cell part (GO:0044464);; cellular component: organelle (GO:0043226);; cellular component: membrane (GO:0016020);; cellular component: organelle part (GO:0044422);; biological process: metabolic process (GO:0008152);; biological p…	Ascorbate and aldarate metabolism (ko00053)
	Unigene_322463	MDAR3	0.00158343	2.64305	up	1.89e-17	4.63272	up	gag-polypeptide of LTR copia-type;; gag-polypeptide of LTR copia-type;; Pyridine nucleotide-disulphide oxidoreductase;; Pyridine nucleotide-disulphide oxidoreductase	Monodehydroascorbate reductase 3, cytosolic OS=Oryza sativa subsp. japonica OX=39947 GN=MDAR3 PE=1 SV=1	--	biological process: response to stimulus (GO:0050896);; molecular function: catalytic activity (GO:0003824);; cellular component: cell (GO:0005623);; cellular component: cell part (GO:0044464);; cellular component: organelle (GO:0043226);; cellular component: membrane (GO:0016020);; cellular component: organelle part (GO:0044422);; biological process: metabolic process (GO:0008152);; biological p…	Ascorbate and aldarate metabolism (ko00053)
	Unigene_587490	MDAR4	0.00457384	2.62175	up	1.11e-09	4.9653	up	--	Monodehydroascorbate reductase 4, cytosolic OS=Oryza sativa subsp. japonica OX=39947 GN=MDAR4 PE=1 SV=1	Monodehydroascorbate reductase [Triticum urartu]	biological process: response to stimulus (GO:0050896);; molecular function: catalytic activity (GO:0003824);; cellular component: cell (GO:0005623);; cellular component: cell part (GO:0044464);; cellular component: organelle (GO:0043226);; cellular component: membrane (GO:0016020);; cellular component: organelle part (GO:0044422);; biological process: metabolic process (GO:0008152);; biological p…	Ascorbate and aldarate metabolism (ko00053)
	Unigene_525988	MDAR5	0.860703	-0.23705	normal	0.00453292	-3.21727	down	Pyridine nucleotide-disulphide oxidoreductase;; Pyridine nucleotide-disulphide oxidoreductase;; Pyridine nucleotide-disulphide oxidoreductase;; FAD binding domain	Monodehydroascorbate reductase 5, chlorplastic OS=Oryza sativa subsp. japonica OX=39947 GN=MDAR5 PE=2 SV=2	putative monodehydroascorbate reductase [Lolium arundinaceum]	molecular function: binding (GO:0005488);; cellular component: cell (GO:0005623);; cellular component: cell part (GO:0044464);; cellular component: organelle (GO:0043226);; biological process: response to stimulus (GO:0050896);; cellular component: organelle part (GO:0044422);; molecular function: catalytic activity (GO:0003824);; biological process: metabolic process (GO:0008152);; biological pr…	Ascorbate and aldarate metabolism (ko00053)
Glutathione reductase (GR)	Unigene_070974	GOR	0.00692096	1.64094	up	5.46e-09	1.75526	up	Pyridine nucleotide-disulphide oxidoreductase;; Pyridine nucleotide-disulphide oxidoreductase;; Pyridine nucleotide-disulphide oxidoreductase;; L-lysine 6-monooxygenase (NADPH-requiring)	Glutathione reductase, chloroplastic (Fragment) OS=Nicotiana tabacum OX=4097 GN=GOR PE=1 SV=1	glutathione reductase, chloroplastic [Brachypodium distachyon]	molecular function: binding (GO:0005488);; biological process: response to stimulus (GO:0050896);; molecular function: catalytic activity (GO:0003824);; molecular function: antioxidant activity (GO:0016209);; biological process: metabolic process (GO:0008152);; biological process: cellular process (GO:0009987);; biological process: single-organism process (GO:0044699);; biological process: detoxi…	Glutathione metabolism (ko00480)
	Unigene_198831	GOR	0.0162502	1.48854	normal	0.00124966	1.4489	up	Pyridine nucleotide-disulphide oxidoreductase;; Pyridine nucleotide-disulphide oxidoreductase, dimerisation domain;; Pyridine nucleotide-disulphide oxidoreductase;; Pyridine nucleotide-disulphide oxidoreductase;; L-lysine 6-monooxygenase (NADPH-requiring)	Glutathione reductase, chloroplastic (Fragment) OS=Nicotiana tabacum OX=4097 GN=GOR PE=1 SV=1	glutathione reductase, chloroplastic [Brachypodium distachyon]	molecular function: binding (GO:0005488);; biological process: response to stimulus (GO:0050896);; molecular function: catalytic activity (GO:0003824);; molecular function: antioxidant activity (GO:0016209);; biological process: metabolic process (GO:0008152);; biological process: cellular process (GO:0009987);; biological process: single-organism process (GO:0044699);; biological process: detoxi…	Glutathione metabolism (ko00480)
	Unigene_323465	GRC2	9.8e-05	2.11628	up	1.13e-18	2.95264	up	Pyridine nucleotide-disulphide oxidoreductase;; Pyridine nucleotide-disulphide oxidoreductase, dimerisation domain;; Pyridine nucleotide-disulphide oxidoreductase;; Pyridine nucleotide-disulphide oxidoreductase	Glutathione reductase, cytosolic OS=Oryza sativa subsp. japonica OX=39947 GN=GRC2 PE=2 SV=2	cytosolic glutathione reductase [Hordeum vulgare]	biological process: response to stimulus (GO:0050896);; molecular function: catalytic activity (GO:0003824);; molecular function: antioxidant activity (GO:0016209);; biological process: metabolic process (GO:0008152);; biological process: cellular process (GO:0009987);; biological process: single-organism process (GO:0044699);; biological process: detoxification (GO:0098754);; cellular component:…	Glutathione metabolism (ko00480)
	Unigene_510087	GRC2	0.380095	-1.36266	normal	6.17e-05	-6.8849	down	--	Glutathione reductase, cytosolic OS=Oryza sativa subsp. japonica OX=39947 GN=GRC2 PE=2 SV=2	--	biological process: response to stimulus (GO:0050896);; molecular function: catalytic activity (GO:0003824);; molecular function: antioxidant activity (GO:0016209);; biological process: metabolic process (GO:0008152);; biological process: cellular process (GO:0009987);; biological process: single-organism process (GO:0044699);; biological process: detoxification (GO:0098754);; cellular component:…	Glutathione metabolism (ko00480)
	Unigene_527275	GRC2	0.0334919	1.41288	normal	2.07e-09	2.50637	up	Pyridine nucleotide-disulphide oxidoreductase;; Pyridine nucleotide-disulphide oxidoreductase, dimerisation domain;; Pyridine nucleotide-disulphide oxidoreductase;; Pyridine nucleotide-disulphide oxidoreductase	Glutathione reductase, cytosolic OS=Oryza sativa subsp. japonica OX=39947 GN=GRC2 PE=2 SV=2	glutathione reductase, cytosolic [Brachypodium distachyon]	biological process: response to stimulus (GO:0050896);; molecular function: catalytic activity (GO:0003824);; molecular function: antioxidant activity (GO:0016209);; biological process: metabolic process (GO:0008152);; biological process: cellular process (GO:0009987);; biological process: single-organism process (GO:0044699);; biological process: detoxification (GO:0098754);; cellular component:…	Glutathione metabolism (ko00480)
Glutathione peroxidase (GPX)	Unigene_589734	GPX4	0.214968	-1.27565	normal	1.91e-11	-5.66543	down	Glutathione peroxidase;; AhpC/TSA family	Probable glutathione peroxidase 4 OS=Arabidopsis thaliana OX=3702 GN=GPX4 PE=2 SV=1	hypothetical protein CFC21_057475 [Triticum aestivum]	biological process: reproduction (GO:0000003);; biological process: reproductive process (GO:0022414);; biological process: developmental process (GO:0032502);; molecular function: catalytic activity (GO:0003824);; molecular function: antioxidant activity (GO:0016209);; biological process: metabolic process (GO:0008152);; biological process: cellular process (GO:0009987);; biological process: sin…	Glutathione metabolism (ko00480);; Arachidonic acid metabolism (ko00590)
	Unigene_175842	GPX4	0.850047	0.185398	normal	0.000546674	1.28705	up	Glutathione peroxidase;; AhpC/TSA family;; Redoxin	Probable glutathione peroxidase 4 OS=Arabidopsis thaliana OX=3702 GN=GPX4 PE=2 SV=1	hypothetical protein CFC21_057475 [Triticum aestivum]	biological process: reproduction (GO:0000003);; biological process: reproductive process (GO:0022414);; biological process: developmental process (GO:0032502);; molecular function: catalytic activity (GO:0003824);; molecular function: antioxidant activity (GO:0016209);; biological process: metabolic process (GO:0008152);; biological process: cellular process (GO:0009987);; biological process: sin…	Glutathione metabolism (ko00480);; Arachidonic acid metabolism (ko00590)
	Unigene_191978	GPX6	0.0565527	1.39826	normal	2.69e-10	2.74496	up	Glutathione peroxidase	Probable phospholipid hydroperoxide glutathione peroxidase 6, mitochondrial OS=Arabidopsis thaliana OX=3702 GN=GPX6 PE=2 SV=2	uncharacterized protein LOC101759642 [Setaria italica]	molecular function: catalytic activity (GO:0003824);; molecular function: antioxidant activity (GO:0016209);; biological process: metabolic process (GO:0008152);; biological process: cellular process (GO:0009987);; biological process: single-organism process (GO:0044699);; biological process: response to stimulus (GO:0050896);; biological process: detoxification (GO:0098754)	Glutathione metabolism (ko00480);; Arachidonic acid metabolism (ko00590)
	Unigene_593303	GPX6	3.76e-09	2.89306	up	1.39e-12	3.52514	up	Glutathione peroxidase;; AhpC/TSA family;; Redoxin	Probable phospholipid hydroperoxide glutathione peroxidase 6, mitochondrial OS=Arabidopsis thaliana OX=3702 GN=GPX6 PE=2 SV=2	probable phospholipid hydroperoxide glutathione peroxidase [Brachypodium distachyon]	molecular function: catalytic activity (GO:0003824);; molecular function: antioxidant activity (GO:0016209);; biological process: metabolic process (GO:0008152);; biological process: cellular process (GO:0009987);; biological process: single-organism process (GO:0044699);; biological process: response to stimulus (GO:0050896);; biological process: detoxification (GO:0098754)	Glutathione metabolism (ko00480);; Arachidonic acid metabolism (ko00590)
Ascorbate peroxidase (APX)	Unigene_517994	APX1	2.22e-10	-5.92042	down	0.0012252	-5.07282	down	Peroxidase;; Peroxidase	L-ascorbate peroxidase 1, cytosolic OS=Oryza sativa subsp. japonica OX=39947 GN=APX1 PE=1 SV=1	unnamed protein product [Triticum turgidum subsp. durum]	biological process: response to stimulus (GO:0050896);; molecular function: catalytic activity (GO:0003824);; molecular function: antioxidant activity (GO:0016209);; biological process: metabolic process (GO:0008152);; biological process: cellular process (GO:0009987);; biological process: single-organism process (GO:0044699);; biological process: detoxification (GO:0098754);; cellular component:…	Ascorbate and aldarate metabolism (ko00053);; Glutathione metabolism (ko00480)
	Unigene_598992	APX4	0.399992	-0.54232	normal	0.000136058	-1.34019	down	Peroxidase	Probable L-ascorbate peroxidase 4, peroxisomal OS=Oryza sativa subsp. japonica OX=39947 GN=APX4 PE=2 SV=1	ascorbate peroxidase [Puccinellia tenuiflora]	biological process: response to stimulus (GO:0050896);; molecular function: catalytic activity (GO:0003824);; molecular function: antioxidant activity (GO:0016209);; biological process: metabolic process (GO:0008152);; biological process: cellular process (GO:0009987);; biological process: single-organism process (GO:0044699);; biological process: detoxification (GO:0098754);; cellular component:…	Ascorbate and aldarate metabolism (ko00053);; Glutathione metabolism (ko00480)
	Unigene_602538	APX6	0.0117983	-1.63506	normal	5.01e-05	-2.11615	down	Peroxidase	Putative L-ascorbate peroxidase 6 OS=Arabidopsis thaliana OX=3702 GN=APX6 PE=2 SV=1	Chitinase-like protein 1 [Triticum urartu]	molecular function: catalytic activity (GO:0003824);; molecular function: antioxidant activity (GO:0016209);; biological process: metabolic process (GO:0008152);; biological process: cellular process (GO:0009987);; biological process: single-organism process (GO:0044699);; biological process: response to stimulus (GO:0050896);; biological process: detoxification (GO:0098754);; molecular function:…	Ascorbate and aldarate metabolism (ko00053);; Glutathione metabolism (ko00480)
	Unigene_169274	APX7	0.058798	1.25546	normal	1.86e-06	2.06652	up	Peroxidase	Probable L-ascorbate peroxidase 7, chloroplastic OS=Oryza sativa subsp. japonica OX=39947 GN=APX7 PE=2 SV=1	unnamed protein product [Triticum turgidum subsp. durum]	biological process: response to stimulus (GO:0050896);; molecular function: catalytic activity (GO:0003824);; molecular function: antioxidant activity (GO:0016209);; biological process: metabolic process (GO:0008152);; biological process: cellular process (GO:0009987);; biological process: single-organism process (GO:0044699);; biological process: detoxification (GO:0098754);; cellular component:…	Ascorbate and aldarate metabolism (ko00053);; Glutathione metabolism (ko00480)
	Unigene_525107	APX7	0.0788971	1.34666	normal	0.00104985	1.4843	up	Peroxidase	Probable L-ascorbate peroxidase 7, chloroplastic OS=Oryza sativa subsp. japonica OX=39947 GN=APX7 PE=2 SV=1	hypothetical protein CFC21_023810 [Triticum aestivum]	biological process: response to stimulus (GO:0050896);; molecular function: catalytic activity (GO:0003824);; molecular function: antioxidant activity (GO:0016209);; biological process: metabolic process (GO:0008152);; biological process: cellular process (GO:0009987);; biological process: single-organism process (GO:0044699);; biological process: detoxification (GO:0098754);; cellular component:…	Ascorbate and aldarate metabolism (ko00053);; Glutathione metabolism (ko00480)
	Unigene_192767	APX8	0.79211	-0.344871	normal	4.82e-05	-4.17977	down	Peroxidase	Probable L-ascorbate peroxidase 8, chloroplastic OS=Oryza sativa subsp. japonica OX=39947 GN=APX8 PE=1 SV=2	probable L-ascorbate peroxidase 8, chloroplastic isoform X2 [Aegilops tauschii subsp. tauschii]	biological process: response to stimulus (GO:0050896);; molecular function: catalytic activity (GO:0003824);; molecular function: antioxidant activity (GO:0016209);; biological process: metabolic process (GO:0008152);; biological process: cellular process (GO:0009987);; biological process: single-organism process (GO:0044699);; biological process: detoxification (GO:0098754);; cellular component:…	Ascorbate and aldarate metabolism (ko00053);; Glutathione metabolism (ko00480)
	Unigene_600459	APX8	0.178434	-0.871166	normal	6.8e-11	-4.42321	down	Peroxidase	Probable L-ascorbate peroxidase 8, chloroplastic OS=Oryza sativa subsp. japonica OX=39947 GN=APX8 PE=1 SV=2	putative L-ascorbate peroxidase 8, chloroplastic [Triticum urartu]	biological process: response to stimulus (GO:0050896);; molecular function: catalytic activity (GO:0003824);; molecular function: antioxidant activity (GO:0016209);; biological process: metabolic process (GO:0008152);; biological process: cellular process (GO:0009987);; biological process: single-organism process (GO:0044699);; biological process: detoxification (GO:0098754);; cellular component:…	Ascorbate and aldarate metabolism (ko00053);; Glutathione metabolism (ko00480)
	Unigene_074998	APX8	0.560449	-0.659877	normal	0.007706	-1.34926	down	Peroxidase;; TPR repeat;; Uncharacterized protein family UPF0016	Probable L-ascorbate peroxidase 8, chloroplastic OS=Oryza sativa subsp. japonica OX=39947 GN=APX8 PE=1 SV=2	probable L-ascorbate peroxidase 8, chloroplastic isoform X2 [Aegilops tauschii subsp. tauschii]	biological process: response to stimulus (GO:0050896);; molecular function: catalytic activity (GO:0003824);; molecular function: antioxidant activity (GO:0016209);; biological process: metabolic process (GO:0008152);; biological process: cellular process (GO:0009987);; biological process: single-organism process (GO:0044699);; biological process: detoxification (GO:0098754);; cellular component:…	Ascorbate and aldarate metabolism (ko00053);; Glutathione metabolism (ko00480)
Glutamate dehydrogenase(GDH)	Unigene_010323	GDH2	2.21e-05	2.79691	up	1.05e-15	4.09972	up	Glu/Leu/Phe/Val dehydrogenase, dimerisation domain;; Glutamate/Leucine/Phenylalanine/Valine dehydrogenase;; Glutamate/Leucine/Phenylalanine/Valine dehydrogenase	Glutamate dehydrogenase 2, mitochondrial OS=Oryza sativa subsp. indica OX=39946 GN=GDH2 PE=3 SV=1	unnamed protein product [Triticum turgidum subsp. durum]	biological process: metabolic process (GO:0008152);; biological process: cellular process (GO:0009987);; biological process: single-organism process (GO:0044699);; molecular function: catalytic activity (GO:0003824)	Arginine biosynthesis (ko00220);; Alanine, aspartate and glutamate metabolism (ko00250);; Nitrogen metabolism (ko00910);; Carbon metabolism (ko01200)
	Unigene_071263	GDH2	0.00171475	2.2228	up	8.47e-12	4.6231	up	Glutamate/Leucine/Phenylalanine/Valine dehydrogenase;; Glu/Leu/Phe/Val dehydrogenase, dimerisation domain;; Glutamate/Leucine/Phenylalanine/Valine dehydrogenase;; Glu/Leu/Phe/Val dehydrogenase, dimerisation domain	Glutamate dehydrogenase 2, mitochondrial OS=Oryza sativa subsp. indica OX=39946 GN=GDH2 PE=3 SV=1	unnamed protein product [Triticum turgidum subsp. durum]	biological process: metabolic process (GO:0008152);; biological process: cellular process (GO:0009987);; biological process: single-organism process (GO:0044699);; molecular function: catalytic activity (GO:0003824)	Arginine biosynthesis (ko00220);; Alanine, aspartate and glutamate metabolism (ko00250);; Nitrogen metabolism (ko00910);; Carbon metabolism (ko01200)
	Unigene_195987	GDH1	0.31176	0.964556	normal	9.55e-05	1.94308	up	Glu/Leu/Phe/Val dehydrogenase, dimerisation domain;; Glutamate/Leucine/Phenylalanine/Valine dehydrogenase;; Acetyltransferase (GNAT) domain;; Glutamate/Leucine/Phenylalanine/Valine dehydrogenase	Glutamate dehydrogenase 1, mitochondrial OS=Oryza sativa subsp. indica OX=39946 GN=GDH1 PE=3 SV=2	hypothetical protein CFC21_073935 [Triticum aestivum]	molecular function: binding (GO:0005488);; molecular function: catalytic activity (GO:0003824);; biological process: metabolic process (GO:0008152);; biological process: single-organism process (GO:0044699);; cellular component: cell (GO:0005623);; cellular component: cell part (GO:0044464);; cellular component: organelle (GO:0043226);; biological process: cellular process (GO:0009987);; biologic…	Arginine biosynthesis (ko00220);; Alanine, aspartate and glutamate metabolism (ko00250);; Nitrogen metabolism (ko00910);; Carbon metabolism (ko01200)
Glutathione synthetase (GSH)	Unigene_067425	GSH2	8.16e-06	2.87249	up	3.84e-15	3.81375	up	Eukaryotic glutathione synthase, ATP binding domain;; Eukaryotic glutathione synthase	Glutathione synthetase, chloroplastic OS=Brassica juncea OX=3707 GN=GSH2 PE=2 SV=1	glutathione synthetase, chloroplastic-like isoform X1 [Aegilops tauschii subsp. tauschii]	molecular function: binding (GO:0005488);; biological process: response to stimulus (GO:0050896);; molecular function: catalytic activity (GO:0003824);; biological process: metabolic process (GO:0008152);; biological process: cellular process (GO:0009987);; cellular component: cell (GO:0005623);; cellular component: cell part (GO:0044464);; biological process: single-organism process (GO:0044699)…	Cysteine and methionine metabolism (ko00270);; Glutathione metabolism (ko00480)
	Unigene_187580	GSH2	4.33e-05	3.20453	up	0.0326288	1.55191	normal	Eukaryotic glutathione synthase, ATP binding domain;; Eukaryotic glutathione synthase	Glutathione synthetase, chloroplastic OS=Brassica juncea OX=3707 GN=GSH2 PE=2 SV=1	hypothetical protein CFC21_082811 [Triticum aestivum]	molecular function: binding (GO:0005488);; biological process: response to stimulus (GO:0050896);; molecular function: catalytic activity (GO:0003824);; biological process: metabolic process (GO:0008152);; biological process: cellular process (GO:0009987);; cellular component: cell (GO:0005623);; cellular component: cell part (GO:0044464);; biological process: single-organism process (GO:0044699)…	Cysteine and methionine metabolism (ko00270);; Glutathione metabolism (ko00480)
	Unigene_446094	NEET	0.459971	0.83668	normal	4.91e-06	1.97139	up	Iron-binding zinc finger CDGSH type	CDGSH iron-sulfur domain-containing protein NEET OS=Arabidopsis thaliana OX=3702 GN=NEET PE=1 SV=1	CDGSH iron-sulfur domain-containing protein NEET [Brachypodium distachyon]	biological process: metabolic process (GO:0008152);; biological process: cellular process (GO:0009987);; biological process: single-organism process (GO:0044699);; biological process: cellular component organization or biogenesis (GO:0071840);; molecular function: binding (GO:0005488);; cellular component: cell (GO:0005623);; cellular component: cell part (GO:0044464);; cellular component: organe…	--
	Unigene_520664	GSH2	0.0120435	-2.19848	normal	3.72e-11	-6.02692	down	Eukaryotic glutathione synthase, ATP binding domain;; Eukaryotic glutathione synthase;; Eukaryotic glutathione synthase, ATP binding domain;; Eukaryotic glutathione synthase;; Eukaryotic glutathione synthase, ATP binding domain;; Eukaryotic glutathione synthase	Glutathione synthetase, chloroplastic OS=Brassica juncea OX=3707 GN=GSH2 PE=2 SV=1	predicted protein [Hordeum vulgare subsp. vulgare]	molecular function: catalytic activity (GO:0003824);; biological process: metabolic process (GO:0008152);; biological process: cellular process (GO:0009987);; molecular function: binding (GO:0005488)	Cysteine and methionine metabolism (ko00270);; Glutathione metabolism (ko00480)
	Unigene_524844	GSH2	1.73e-05	2.48664	up	1.24e-05	1.9017	up	Eukaryotic glutathione synthase, ATP binding domain;; Eukaryotic glutathione synthase	Glutathione synthetase, chloroplastic OS=Brassica juncea OX=3707 GN=GSH2 PE=2 SV=1	hypothetical protein CFC21_087556 [Triticum aestivum]	molecular function: binding (GO:0005488);; biological process: response to stimulus (GO:0050896);; molecular function: catalytic activity (GO:0003824);; biological process: metabolic process (GO:0008152);; biological process: cellular process (GO:0009987);; cellular component: cell (GO:0005623);; cellular component: cell part (GO:0044464);; biological process: single-organism process (GO:0044699)…	Cysteine and methionine metabolism (ko00270);; Glutathione metabolism (ko00480)
	Unigene_600305	GSH2	0.00822237	-2.1778	down	3.15e-05	-3.63753	down	Eukaryotic glutathione synthase, ATP binding domain;; Eukaryotic glutathione synthase	Glutathione synthetase, chloroplastic OS=Brassica juncea OX=3707 GN=GSH2 PE=2 SV=1	predicted protein [Hordeum vulgare subsp. vulgare]	molecular function: catalytic activity (GO:0003824);; biological process: metabolic process (GO:0008152);; biological process: cellular process (GO:0009987);; molecular function: binding (GO:0005488)	Cysteine and methionine metabolism (ko00270);; Glutathione metabolism (ko00480)
Respiratory burst oxidase (RBOH)	Unigene_073739	RBOHA	0.0669355	1.33415	normal	1.47e-07	2.39881	up	Ferric reductase NAD binding domain;; FAD-binding domain;; Ferric reductase like transmembrane component	Respiratory burst oxidase homolog protein A OS=Solanum tuberosum OX=4113 GN=RBOHA PE=1 SV=1	respiratory burst oxidase homolog protein A [Brachypodium distachyon]	molecular function: catalytic activity (GO:0003824);; biological process: metabolic process (GO:0008152);; biological process: single-organism process (GO:0044699)	MAPK signaling pathway - plant (ko04016);; Plant-pathogen interaction (ko04626)
	Unigene_199585	RBOHA	0.00141029	1.94674	up	0.000127225	1.80704	up	Ferric reductase NAD binding domain;; Respiratory burst NADPH oxidase;; FAD-binding domain;; Ferric reductase like transmembrane component;; EF-hand domain pair	Respiratory burst oxidase homolog protein A OS=Solanum tuberosum OX=4113 GN=RBOHA PE=1 SV=1	hypothetical protein CFC21_071654 [Triticum aestivum]	molecular function: catalytic activity (GO:0003824);; molecular function: antioxidant activity (GO:0016209);; biological process: metabolic process (GO:0008152);; biological process: cellular process (GO:0009987);; biological process: single-organism process (GO:0044699);; biological process: response to stimulus (GO:0050896);; biological process: detoxification (GO:0098754)	MAPK signaling pathway - plant (ko04016);; Plant-pathogen interaction (ko04626)
	Unigene_326208	RBOHA	1.49e-06	2.66167	up	1.01e-55	3.94657	up	Ferric reductase NAD binding domain;; FAD-binding domain;; Ferric reductase like transmembrane component	Respiratory burst oxidase homolog protein A OS=Solanum tuberosum OX=4113 GN=RBOHA PE=1 SV=1	respiratory burst oxidase homolog protein A [Brachypodium distachyon]	molecular function: catalytic activity (GO:0003824);; biological process: metabolic process (GO:0008152);; biological process: single-organism process (GO:0044699)	MAPK signaling pathway - plant (ko04016);; Plant-pathogen interaction (ko04626)
	Unigene_577344	RBOHA	0.146818	1.70612	normal	0.0051351	2.42139	up	Respiratory burst NADPH oxidase	Respiratory burst oxidase homolog protein A OS=Solanum tuberosum OX=4113 GN=RBOHA PE=1 SV=1	respiratory burst oxidase homolog protein A [Brachypodium distachyon]	molecular function: catalytic activity (GO:0003824);; molecular function: antioxidant activity (GO:0016209);; biological process: metabolic process (GO:0008152);; biological process: cellular process (GO:0009987);; biological process: single-organism process (GO:0044699);; biological process: response to stimulus (GO:0050896);; biological process: detoxification (GO:0098754)	MAPK signaling pathway - plant (ko04016);; Plant-pathogen interaction (ko04626)
	Unigene_606033	RBOHA	0.000159348	2.20292	up	0.00300752	1.74588	up	Ferric reductase NAD binding domain;; Respiratory burst NADPH oxidase;; FAD-binding domain;; Ferric reductase like transmembrane component;; EF-hand domain pair;; EF hand	Respiratory burst oxidase homolog protein A OS=Solanum tuberosum OX=4113 GN=RBOHA PE=1 SV=1	respiratory burst oxidase-like protein F2 [Hordeum vulgare subsp. vulgare]	molecular function: catalytic activity (GO:0003824);; molecular function: antioxidant activity (GO:0016209);; biological process: metabolic process (GO:0008152);; biological process: cellular process (GO:0009987);; biological process: single-organism process (GO:0044699);; biological process: response to stimulus (GO:0050896);; biological process: detoxification (GO:0098754)	MAPK signaling pathway - plant (ko04016)
	Unigene_026743	RBOHA	0.0493357	1.67148	normal	4.99e-06	2.82504	up	Ferric reductase NAD binding domain;; FAD-binding domain;; Ferric reductase like transmembrane component;; Respiratory burst NADPH oxidase	Respiratory burst oxidase homolog protein A OS=Solanum tuberosum OX=4113 GN=RBOHA PE=1 SV=1	hypothetical protein GQ55_5G169500 [Panicum hallii var. hallii]	molecular function: catalytic activity (GO:0003824);; molecular function: antioxidant activity (GO:0016209);; biological process: metabolic process (GO:0008152);; biological process: cellular process (GO:0009987);; biological process: single-organism process (GO:0044699);; biological process: response to stimulus (GO:0050896);; biological process: detoxification (GO:0098754)	MAPK signaling pathway - plant (ko04016);; Plant-pathogen interaction (ko04626)
	Unigene_177771	RBOHA	0.000557747	2.39688	up	2.12e-10	3.34194	up	FAD-binding domain;; Ferric reductase like transmembrane component	Respiratory burst oxidase homolog protein A OS=Solanum tuberosum OX=4113 GN=RBOHA PE=1 SV=1	respiratory burst oxidase-like protein F2 [Hordeum vulgare]	molecular function: catalytic activity (GO:0003824);; biological process: metabolic process (GO:0008152);; biological process: single-organism process (GO:0044699)	MAPK signaling pathway - plant (ko04016);; Plant-pathogen interaction (ko04626)
	Unigene_326207	RBOHA	0.0300429	1.36016	normal	1.15e-09	2.23522	up	Respiratory burst NADPH oxidase	Respiratory burst oxidase homolog protein A OS=Solanum tuberosum OX=4113 GN=RBOHA PE=1 SV=1	hypothetical protein TRIUR3_23393 [Triticum urartu]	molecular function: catalytic activity (GO:0003824);; molecular function: antioxidant activity (GO:0016209);; biological process: metabolic process (GO:0008152);; biological process: cellular process (GO:0009987);; biological process: single-organism process (GO:0044699);; biological process: response to stimulus (GO:0050896);; biological process: detoxification (GO:0098754)	MAPK signaling pathway - plant (ko04016);; Plant-pathogen interaction (ko04626)
	Unigene_317563	RBOHC	0.33627	0.741571	normal	0.00567675	1.23101	up	Respiratory burst NADPH oxidase;; EF-hand domain pair;; EF hand;; EF-hand domain	Respiratory burst oxidase homolog protein C OS=Solanum tuberosum OX=4113 GN=RBOHC PE=1 SV=2	respiratory burst oxidase homolog protein B-like [Aegilops tauschii subsp. tauschii]	molecular function: catalytic activity (GO:0003824);; molecular function: antioxidant activity (GO:0016209);; biological process: metabolic process (GO:0008152);; biological process: cellular process (GO:0009987);; biological process: single-organism process (GO:0044699);; biological process: response to stimulus (GO:0050896);; biological process: detoxification (GO:0098754)	MAPK signaling pathway - plant (ko04016);; Plant-pathogen interaction (ko04626)
	Unigene_056055	RBOHE	0.168397	1.17794	normal	0.00154065	1.69206	up	FAD-binding domain;; Ferric reductase like transmembrane component;; Ferric reductase NAD binding domain	Respiratory burst oxidase homolog protein E OS=Arabidopsis thaliana OX=3702 GN=RBOHE PE=2 SV=2	Respiratory burst oxidase-like protein E [Triticum urartu]	molecular function: catalytic activity (GO:0003824);; biological process: metabolic process (GO:0008152);; biological process: single-organism process (GO:0044699)	MAPK signaling pathway - plant (ko04016);; Plant-pathogen interaction (ko04626)
	Unigene_024748	RBOHE	--	--	--	0.000548271	4.13543	up	--	Respiratory burst oxidase homolog protein E OS=Arabidopsis thaliana OX=3702 GN=RBOHE PE=2 SV=2	predicted protein, partial [Hordeum vulgare subsp. vulgare]	--	MAPK signaling pathway - plant (ko04016);; Plant-pathogen interaction (ko04626)
	Unigene_588087	RBOHF	0.56586	0.690872	normal	0.000202601	2.50051	up	Ferric reductase NAD binding domain	Respiratory burst oxidase homolog protein F OS=Arabidopsis thaliana OX=3702 GN=RBOHF PE=1 SV=1	respiratory burst oxidase homolog protein A [Brachypodium distachyon]	molecular function: catalytic activity (GO:0003824);; biological process: metabolic process (GO:0008152);; biological process: single-organism process (GO:0044699)	MAPK signaling pathway - plant (ko04016);; Plant-pathogen interaction (ko04626)
Alternative oxidase (AOX)	Unigene_195173	NDA1	0.128191	1.27877	normal	0.00328306	1.31833	up	Pyridine nucleotide-disulphide oxidoreductase;; Pyridine nucleotide-disulphide oxidoreductase;; Pyridine nucleotide-disulphide oxidoreductase	Internal alternative NAD(P)H-ubiquinone oxidoreductase A1, mitochondrial OS=Arabidopsis thaliana OX=3702 GN=NDA1 PE=2 SV=1	hypothetical protein CFC21_048619 [Triticum aestivum]	molecular function: catalytic activity (GO:0003824);; biological process: metabolic process (GO:0008152);; biological process: single-organism process (GO:0044699);; cellular component: cell (GO:0005623);; cellular component: cell part (GO:0044464);; cellular component: organelle (GO:0043226);; cellular component: organelle part (GO:0044422);; cellular component: membrane (GO:0016020);; cellular …	--
	Unigene_526824	NDB1	2.59e-05	-3.789	down	1.98e-10	-9.52389	down	Pyridine nucleotide-disulphide oxidoreductase;; EF-hand domain;; EF hand;; Pyridine nucleotide-disulphide oxidoreductase;; Pyridine nucleotide-disulphide oxidoreductase	External alternative NAD(P)H-ubiquinone oxidoreductase B1, mitochondrial OS=Solanum tuberosum OX=4113 GN=NDB1 PE=3 SV=1	external alternative NAD(P)H-ubiquinone oxidoreductase B1, mitochondrial [Hordeum vulgare]	molecular function: catalytic activity (GO:0003824);; biological process: metabolic process (GO:0008152);; biological process: single-organism process (GO:0044699)	--
	Unigene_017821	NDB2	0.00317845	2.07447	up	5.84e-13	3.04956	up	Pyridine nucleotide-disulphide oxidoreductase;; Pyridine nucleotide-disulphide oxidoreductase;; Pyridine nucleotide-disulphide oxidoreductase	External alternative NAD(P)H-ubiquinone oxidoreductase B2, mitochondrial OS=Arabidopsis thaliana OX=3702 GN=NDB2 PE=1 SV=1	predicted protein [Hordeum vulgare subsp. vulgare]	biological process: cellular process (GO:0009987);; biological process: developmental process (GO:0032502);; biological process: single-organism process (GO:0044699);; molecular function: catalytic activity (GO:0003824);; biological process: metabolic process (GO:0008152);; molecular function: binding (GO:0005488);; cellular component: cell (GO:0005623);; cellular component: cell part (GO:0044464…	--
	Unigene_071421	NDB2	0.00531837	1.74681	up	1.62e-06	2.11967	up	Pyridine nucleotide-disulphide oxidoreductase;; Pyridine nucleotide-disulphide oxidoreductase;; EF-hand domain;; EF hand	External alternative NAD(P)H-ubiquinone oxidoreductase B2, mitochondrial OS=Arabidopsis thaliana OX=3702 GN=NDB2 PE=1 SV=1	external alternative NAD(P)H-ubiquinone oxidoreductase B2, mitochondrial-like [Hordeum vulgare]	biological process: cellular process (GO:0009987);; biological process: developmental process (GO:0032502);; biological process: single-organism process (GO:0044699);; molecular function: catalytic activity (GO:0003824);; biological process: metabolic process (GO:0008152);; cellular component: cell (GO:0005623);; cellular component: cell part (GO:0044464);; cellular component: organelle (GO:00432…	--
	Unigene_053286	NDB3	1.71e-07	4.60596	up	5.73e-15	6.2974	up	Pyridine nucleotide-disulphide oxidoreductase;; Pyridine nucleotide-disulphide oxidoreductase	External alternative NAD(P)H-ubiquinone oxidoreductase B3, mitochondrial OS=Arabidopsis thaliana OX=3702 GN=NDB3 PE=2 SV=1	External NADH-ubiquinone oxidoreductase 1, mitochondrial [Hordeum vulgare]	biological process: cellular process (GO:0009987);; biological process: developmental process (GO:0032502);; biological process: single-organism process (GO:0044699);; molecular function: catalytic activity (GO:0003824);; biological process: metabolic process (GO:0008152);; cellular component: cell (GO:0005623);; cellular component: cell part (GO:0044464);; cellular component: organelle (GO:00432…	--
	Unigene_316450	NDC1	0.0721674	1.43593	normal	2.75e-07	2.12623	up	Pyridine nucleotide-disulphide oxidoreductase;; Pyridine nucleotide-disulphide oxidoreductase;; Pyridine nucleotide-disulphide oxidoreductase	Alternative NAD(P)H-ubiquinone oxidoreductase C1, chloroplastic/mitochondrial OS=Arabidopsis thaliana OX=3702 GN=NDC1 PE=1 SV=2	unnamed protein product [Triticum turgidum subsp. durum]	molecular function: catalytic activity (GO:0003824);; cellular component: cell (GO:0005623);; cellular component: cell part (GO:0044464);; cellular component: organelle (GO:0043226);; biological process: metabolic process (GO:0008152);; biological process: cellular process (GO:0009987);; biological process: single-organism process (GO:0044699);; biological process: response to stimulus (GO:005089…	Ubiquinone and other terpenoid-quinone biosynthesis (ko00130)
	Unigene_605272	NDC1	0.00426337	2.0758	up	0.215211	-1.24822	normal	Pyridine nucleotide-disulphide oxidoreductase;; Pyridine nucleotide-disulphide oxidoreductase;; FAD-NAD(P)-binding	Alternative NAD(P)H-ubiquinone oxidoreductase C1, chloroplastic/mitochondrial OS=Arabidopsis thaliana OX=3702 GN=NDC1 PE=1 SV=2	hypothetical protein CFC21_101734 [Triticum aestivum]	molecular function: catalytic activity (GO:0003824);; cellular component: cell (GO:0005623);; cellular component: cell part (GO:0044464);; cellular component: organelle (GO:0043226);; biological process: metabolic process (GO:0008152);; biological process: cellular process (GO:0009987);; biological process: single-organism process (GO:0044699);; biological process: response to stimulus (GO:005089…	Ubiquinone and other terpenoid-quinone biosynthesis (ko00130)
Mitogen-activated protein kinase (MAPK)	Unigene_595636	MPK4	0.0135502	-1.50526	normal	8.67e-06	-2.09867	down	Protein kinase domain;; Protein tyrosine and serine/threonine kinase;; Lipopolysaccharide kinase (Kdo/WaaP) family	Mitogen-activated protein kinase 4 OS=Oryza sativa subsp. japonica OX=39947 GN=MPK4 PE=2 SV=1	--	biological process: metabolic process (GO:0008152);; biological process: cellular process (GO:0009987);; biological process: signaling (GO:0023052);; biological process: single-organism process (GO:0044699);; biological process: response to stimulus (GO:0050896);; biological process: biological regulation (GO:0065007);; molecular function: catalytic activity (GO:0003824);; molecular function: sig…	MAPK signaling pathway - plant (ko04016)
	Unigene_171045	MPK7	0.00215535	-2.6879	down	1.62e-09	-3.05018	down	--	Mitogen-activated protein kinase 7 OS=Oryza sativa subsp. japonica OX=39947 GN=MPK7 PE=2 SV=1	mitogen-activated protein kinase 7 [Brachypodium distachyon]	biological process: metabolic process (GO:0008152);; biological process: cellular process (GO:0009987);; biological process: signaling (GO:0023052);; biological process: single-organism process (GO:0044699);; biological process: response to stimulus (GO:0050896);; biological process: biological regulation (GO:0065007);; molecular function: catalytic activity (GO:0003824);; molecular function: sig…	--
	Unigene_525422	MPK7	0.0395182	1.22847	normal	7.39e-06	1.94527	up	Protein kinase domain;; Protein tyrosine and serine/threonine kinase;; Lipopolysaccharide kinase (Kdo/WaaP) family	Mitogen-activated protein kinase 7 OS=Oryza sativa subsp. japonica OX=39947 GN=MPK7 PE=2 SV=1	mitogen-activated protein kinase 7-like [Aegilops tauschii subsp. tauschii]	biological process: metabolic process (GO:0008152);; biological process: cellular process (GO:0009987);; biological process: signaling (GO:0023052);; biological process: single-organism process (GO:0044699);; biological process: response to stimulus (GO:0050896);; biological process: biological regulation (GO:0065007);; molecular function: catalytic activity (GO:0003824);; molecular function: sig…	MAPK signaling pathway - plant (ko04016)
	Unigene_592887	MPK7	5.75e-07	-2.74556	down	1.01e-23	-3.97351	down	Protein kinase domain;; Protein tyrosine and serine/threonine kinase;; Lipopolysaccharide kinase (Kdo/WaaP) family	Mitogen-activated protein kinase 7 OS=Oryza sativa subsp. japonica OX=39947 GN=MPK7 PE=2 SV=1	predicted protein [Hordeum vulgare subsp. vulgare]	biological process: metabolic process (GO:0008152);; biological process: cellular process (GO:0009987);; biological process: signaling (GO:0023052);; biological process: single-organism process (GO:0044699);; biological process: response to stimulus (GO:0050896);; biological process: biological regulation (GO:0065007);; molecular function: catalytic activity (GO:0003824);; molecular function: sig…	MAPK signaling pathway - plant (ko04016)
	Unigene_508504	MPK8	0.000774566	-2.90182	down	1.91e-07	-4.62045	down	Protein kinase domain;; Protein tyrosine and serine/threonine kinase;; Lipopolysaccharide kinase (Kdo/WaaP) family	Mitogen-activated protein kinase 8 OS=Oryza sativa subsp. japonica OX=39947 GN=MPK8 PE=2 SV=2	unnamed protein product [Triticum turgidum subsp. durum]	biological process: metabolic process (GO:0008152);; biological process: cellular process (GO:0009987);; biological process: signaling (GO:0023052);; biological process: single-organism process (GO:0044699);; biological process: response to stimulus (GO:0050896);; biological process: biological regulation (GO:0065007);; molecular function: catalytic activity (GO:0003824);; molecular function: sig…	--
	Unigene_192630	MPK9	0.000376197	2.16344	up	1.25e-15	3.3138	up	--	Mitogen-activated protein kinase 9 OS=Oryza sativa subsp. japonica OX=39947 GN=MPK9 PE=3 SV=2	hypothetical protein BRADI_2g15317v3 [Brachypodium distachyon]	--	--
	Unigene_317252	MPK9	0.00554255	1.90579	up	1.69e-18	3.32565	up	--	Mitogen-activated protein kinase 9 OS=Oryza sativa subsp. japonica OX=39947 GN=MPK9 PE=3 SV=2	hypothetical protein BRADI_2g15317v3 [Brachypodium distachyon]	--	--
	Unigene_072008	MKK9	5.83e-06	-3.68962	down	6.49e-05	-3.13378	down	Protein kinase domain;; Protein tyrosine and serine/threonine kinase;; Phosphotransferase enzyme family;; Protein kinase domain;; Protein tyrosine and serine/threonine kinase	Mitogen-activated protein kinase kinase 9 OS=Arabidopsis thaliana OX=3702 GN=MKK9 PE=1 SV=1	unnamed protein product [Triticum turgidum subsp. durum]	biological process: reproduction (GO:0000003);; biological process: cellular process (GO:0009987);; biological process: signaling (GO:0023052);; biological process: single-organism process (GO:0044699);; biological process: response to stimulus (GO:0050896);; biological process: biological regulation (GO:0065007);; biological process: metabolic process (GO:0008152);; biological process: multi-org…	MAPK signaling pathway - plant (ko04016)
	Unigene_194819	MKK9	6.52e-07	-2.98076	down	2.17e-08	-3.57099	down	Protein kinase domain;; Protein tyrosine and serine/threonine kinase	Mitogen-activated protein kinase kinase 9 OS=Arabidopsis thaliana OX=3702 GN=MKK9 PE=1 SV=1	hypothetical protein CFC21_051421 [Triticum aestivum]	biological process: reproduction (GO:0000003);; biological process: cellular process (GO:0009987);; biological process: signaling (GO:0023052);; biological process: single-organism process (GO:0044699);; biological process: response to stimulus (GO:0050896);; biological process: biological regulation (GO:0065007);; biological process: metabolic process (GO:0008152);; biological process: multi-org…	MAPK signaling pathway - plant (ko04016)
	Unigene_074949	MPK10	0.291874	0.754672	normal	1.06e-05	1.64721	up	--	Mitogen-activated protein kinase 10 OS=Oryza sativa subsp. japonica OX=39947 GN=MPK10 PE=2 SV=2	unnamed protein product [Triticum turgidum subsp. durum]	biological process: metabolic process (GO:0008152);; biological process: cellular process (GO:0009987);; biological process: signaling (GO:0023052);; biological process: single-organism process (GO:0044699);; biological process: response to stimulus (GO:0050896);; biological process: biological regulation (GO:0065007);; molecular function: catalytic activity (GO:0003824);; molecular function: sig…	--
	Unigene_313700	MPK10	0.0291276	1.90517	normal	6.52e-13	2.93021	up	--	Mitogen-activated protein kinase 10 OS=Oryza sativa subsp. japonica OX=39947 GN=MPK10 PE=2 SV=2	unnamed protein product [Triticum turgidum subsp. durum]	biological process: metabolic process (GO:0008152);; biological process: cellular process (GO:0009987);; biological process: signaling (GO:0023052);; biological process: single-organism process (GO:0044699);; biological process: response to stimulus (GO:0050896);; biological process: biological regulation (GO:0065007);; molecular function: catalytic activity (GO:0003824);; molecular function: sig…	MAPK signaling pathway - plant (ko04016)
	Unigene_318061	MPK10	0.0267574	2.02012	normal	1.47e-07	3.48786	up	Protein kinase domain;; Protein tyrosine and serine/threonine kinase;; Lipopolysaccharide kinase (Kdo/WaaP) family;; Kinase-like	Mitogen-activated protein kinase 10 OS=Oryza sativa subsp. japonica OX=39947 GN=MPK10 PE=2 SV=2	mitogen-activated protein kinase 10 [Sorghum bicolor]	molecular function: catalytic activity (GO:0003824);; biological process: metabolic process (GO:0008152);; biological process: cellular process (GO:0009987);; molecular function: binding (GO:0005488);; cellular component: cell (GO:0005623);; cellular component: cell part (GO:0044464);; biological process: signaling (GO:0023052);; biological process: single-organism process (GO:0044699);; biologic…	--
	Unigene_197989	MPK11	8.62e-06	2.96477	up	3.5e-12	3.85043	up	Protein kinase domain;; Protein tyrosine and serine/threonine kinase;; Lipopolysaccharide kinase (Kdo/WaaP) family	Mitogen-activated protein kinase 11 OS=Oryza sativa subsp. japonica OX=39947 GN=MPK11 PE=2 SV=2	hypothetical protein CFC21_098423 [Triticum aestivum]	biological process: metabolic process (GO:0008152);; biological process: cellular process (GO:0009987);; biological process: signaling (GO:0023052);; biological process: single-organism process (GO:0044699);; biological process: response to stimulus (GO:0050896);; biological process: biological regulation (GO:0065007);; molecular function: catalytic activity (GO:0003824);; molecular function: sig…	MAPK signaling pathway - plant (ko04016)
	Unigene_316344	MPK11	0.107598	1.72494	normal	2.34e-05	2.89943	up	Protein kinase domain;; Protein tyrosine and serine/threonine kinase	Mitogen-activated protein kinase 11 OS=Oryza sativa subsp. japonica OX=39947 GN=MPK11 PE=2 SV=2	hypothetical protein F2Q69_00010563, partial [Brassica cretica]	biological process: metabolic process (GO:0008152);; biological process: cellular process (GO:0009987);; biological process: signaling (GO:0023052);; biological process: single-organism process (GO:0044699);; biological process: response to stimulus (GO:0050896);; biological process: biological regulation (GO:0065007);; molecular function: catalytic activity (GO:0003824);; molecular function: sig…	--
	Unigene_195216	MPK12	0.504829	0.650368	normal	0.00101202	1.89172	up	Protein kinase domain;; Protein kinase domain;; Protein tyrosine and serine/threonine kinase	Mitogen-activated protein kinase 12 OS=Oryza sativa subsp. japonica OX=39947 GN=MPK12 PE=1 SV=2	mitogen-activated protein kinase 2 [Lolium arundinaceum]	biological process: metabolic process (GO:0008152);; biological process: cellular process (GO:0009987);; biological process: signaling (GO:0023052);; biological process: single-organism process (GO:0044699);; biological process: response to stimulus (GO:0050896);; biological process: biological regulation (GO:0065007);; molecular function: catalytic activity (GO:0003824);; molecular function: sig…	MAPK signaling pathway - plant (ko04016)
	Unigene_322111	MPK12	0.528439	0.719369	normal	0.0040856	1.90966	up	Protein kinase domain;; Protein tyrosine and serine/threonine kinase;; Lipopolysaccharide kinase (Kdo/WaaP) family	Mitogen-activated protein kinase 12 OS=Oryza sativa subsp. japonica OX=39947 GN=MPK12 PE=1 SV=2	--	biological process: metabolic process (GO:0008152);; biological process: cellular process (GO:0009987);; biological process: signaling (GO:0023052);; biological process: single-organism process (GO:0044699);; biological process: response to stimulus (GO:0050896);; biological process: biological regulation (GO:0065007);; molecular function: catalytic activity (GO:0003824);; molecular function: sig…	MAPK signaling pathway - plant (ko04016)
	Unigene_074380	MKK1	0.549061	0.619669	normal	0.000598567	1.78265	up	Protein kinase domain;; Protein tyrosine and serine/threonine kinase	Mitogen-activated protein kinase kinase 1 OS=Oryza sativa subsp. japonica OX=39947 GN=MKK1 PE=1 SV=1	uncharacterized protein LOC100826178 [Brachypodium distachyon]	biological process: reproduction (GO:0000003);; biological process: metabolic process (GO:0008152);; biological process: cellular process (GO:0009987);; biological process: signaling (GO:0023052);; biological process: single-organism process (GO:0044699);; biological process: response to stimulus (GO:0050896);; biological process: biological regulation (GO:0065007);; biological process: cellular …	Plant-pathogen interaction (ko04626)
	Unigene_319868	MKK1	0.341341	1.05372	normal	0.00206066	1.97351	up	Protein kinase domain;; Protein tyrosine and serine/threonine kinase	Mitogen-activated protein kinase kinase 1 OS=Oryza sativa subsp. japonica OX=39947 GN=MKK1 PE=1 SV=1	unnamed protein product [Triticum turgidum subsp. durum]	biological process: reproduction (GO:0000003);; biological process: metabolic process (GO:0008152);; biological process: cellular process (GO:0009987);; biological process: signaling (GO:0023052);; biological process: single-organism process (GO:0044699);; biological process: response to stimulus (GO:0050896);; biological process: biological regulation (GO:0065007);; biological process: cellular …	Plant-pathogen interaction (ko04626)
	Unigene_195942	MEKK1	0.488344	0.624724	normal	0.00171023	1.57764	up	Protein kinase domain;; Protein tyrosine and serine/threonine kinase;; Kinase-like	Mitogen-activated protein kinase kinase kinase 1 OS=Arabidopsis thaliana OX=3702 GN=MEKK1 PE=1 SV=2	unnamed protein product [Triticum turgidum subsp. durum]	molecular function: catalytic activity (GO:0003824);; biological process: metabolic process (GO:0008152);; biological process: cellular process (GO:0009987);; molecular function: binding (GO:0005488)	MAPK signaling pathway - plant (ko04016);; Plant-pathogen interaction (ko04626)
	Unigene_526580	MEKK1	0.239711	0.857731	normal	4.09e-07	1.91969	up	Protein kinase domain;; Protein tyrosine and serine/threonine kinase;; Kinase-like	Mitogen-activated protein kinase kinase kinase 1 OS=Arabidopsis thaliana OX=3702 GN=MEKK1 PE=1 SV=2	unnamed protein product [Triticum turgidum subsp. durum]	molecular function: catalytic activity (GO:0003824);; biological process: metabolic process (GO:0008152);; biological process: cellular process (GO:0009987);; molecular function: binding (GO:0005488)	MAPK signaling pathway - plant (ko04016);; Plant-pathogen interaction (ko04626)
	Unigene_324751	MAPKKK3	3.45e-06	2.76518	up	1.08e-14	3.42612	up	Protein kinase domain;; Protein tyrosine and serine/threonine kinase	Mitogen-activated protein kinase kinase kinase 3 OS=Arabidopsis thaliana OX=3702 GN=MAPKKK3 PE=1 SV=1	mitogen-activated protein kinase kinase kinase 3 isoform X1 [Brachypodium distachyon]	biological process: metabolic process (GO:0008152);; biological process: cellular process (GO:0009987);; biological process: signaling (GO:0023052);; biological process: single-organism process (GO:0044699);; biological process: response to stimulus (GO:0050896);; biological process: biological regulation (GO:0065007);; molecular function: catalytic activity (GO:0003824);; molecular function: sig…	--
	Unigene_198087	MAPKKK5	0.434695	0.685909	normal	1.96e-05	1.43774	up	Protein kinase domain;; Protein tyrosine and serine/threonine kinase	Mitogen-activated protein kinase kinase kinase 5 OS=Arabidopsis thaliana OX=3702 GN=MAPKKK5 PE=1 SV=1	mitogen-activated protein kinase kinase kinase 5-like [Aegilops tauschii subsp. tauschii]	biological process: metabolic process (GO:0008152);; biological process: cellular process (GO:0009987);; biological process: signaling (GO:0023052);; biological process: single-organism process (GO:0044699);; biological process: response to stimulus (GO:0050896);; biological process: biological regulation (GO:0065007);; molecular function: catalytic activity (GO:0003824);; molecular function: sig…	MAPK signaling pathway - plant (ko04016)
	Unigene_065525	MAPKKK17	0.0205768	-2.13367	normal	0.000296295	-4.51587	down	Protein kinase domain;; Protein tyrosine and serine/threonine kinase	Mitogen-activated protein kinase kinase kinase 17 OS=Arabidopsis thaliana OX=3702 GN=MAPKKK17 PE=1 SV=1	unnamed protein product [Triticum turgidum subsp. durum]	molecular function: catalytic activity (GO:0003824);; biological process: metabolic process (GO:0008152);; biological process: cellular process (GO:0009987);; molecular function: binding (GO:0005488)	MAPK signaling pathway - plant (ko04016)

## Sheet: Co-induced
Gene classification	#ID	Gene name	R0_vs_R3_DESeq2_FDR	R0_vs_R3_DESeq2_log2FC	R0_vs_R3_regulated	R0_vs_R6_DESeq2_FDR	R0_vs_R6_DESeq2_log2FC	R0_vs_R6_regulated	S0_vs_S3_DESeq2_FDR	S0_vs_S3_DESeq2_log2FC	S0_vs_S3_regulated	S0_vs_S6_DESeq2_FDR	S0_vs_S6_DESeq2_log2FC	S0_vs_S6_regulated	L0_vs_L3_DESeq2_FDR	L0_vs_L3_DESeq2_log2FC	L0_vs_L3_regulated	L0_vs_L2_DESeq2_FDR	L0_vs_L6_DESeq2_log2FC	L0_vs_L6_regulated	Pfam_annotation	Swissprot_annotation	TrEMBL_annotation	nr_annotation	GO_second_level_annotation	KEGG_pathway_annotation
Peroxidases (POD)	Unigene_510657	PER51	0.00267041	3.83477	up	0.0226506	2.5166	normal	0.0366709	-3.29559	normal	0.00416122	-3.6444	down	0.00048826	-3.47108	down	0.00369691	-2.608	down	Peroxidase	Peroxidase 51 OS=Arabidopsis thaliana OX=3702 GN=PER51 PE=2 SV=1	Peroxidase OS=Triticum turgidum subsp. durum OX=4567 GN=TRITD_5Bv1G203430 PE=3 SV=1	unnamed protein product [Triticum turgidum subsp. durum]	molecular function: catalytic activity (GO:0003824);; molecular function: antioxidant activity (GO:0016209);; biological process: metabolic process (GO:0008152);; biological process: cellular process (GO:0009987);; biological process: single-organism process (GO:0044699);; biological process: response to stimulus (GO:0050896);; biological process: detoxification (GO:0098754);; molecular function:…	Phenylpropanoid biosynthesis (ko00940)
	Unigene_179098	PER70	7.98298e-05	4.54391	up	0.0178426	2.17403	normal	0.0363825	-3.32025	normal	0.000272504	-4.46976	down	5.41131e-11	-8.43094	down	5.38671e-06	-4.2532	down	Peroxidase	Peroxidase 70 OS=Zea mays OX=4577 GN=PER70 PE=1 SV=1	Peroxidase OS=Hordeum vulgare subsp. vulgare OX=112509 PE=3 SV=1	hypothetical protein CFC21_091210 [Triticum aestivum]	molecular function: catalytic activity (GO:0003824);; molecular function: antioxidant activity (GO:0016209);; biological process: metabolic process (GO:0008152);; biological process: cellular process (GO:0009987);; biological process: single-organism process (GO:0044699);; biological process: response to stimulus (GO:0050896);; biological process: detoxification (GO:0098754);; molecular function:…	Phenylpropanoid biosynthesis (ko00940)
Mitogen-activated protein kinase (MAPK)	Unigene_054203	MPK12	0.000479306	4.93924	up	0.125518	2.4994	normal	0.00473283	-3.37554	down	0.313419	-1.58243	normal	0.000147031	-3.75453	down	0.432205	-0.877007	normal	Protein kinase domain;; Protein tyrosine and serine/threonine kinase	Mitogen-activated protein kinase 12 OS=Oryza sativa subsp. japonica OX=39947 GN=MPK12 PE=1 SV=2	Mitogen-activated protein kinase OS=Festuca arundinacea OX=4606 GN=mapk2 PE=2 SV=1	mitogen-activated protein kinase 2 [Lolium arundinaceum]	biological process: metabolic process (GO:0008152);; biological process: cellular process (GO:0009987);; biological process: signaling (GO:0023052);; biological process: single-organism process (GO:0044699);; biological process: response to stimulus (GO:0050896);; biological process: biological regulation (GO:0065007);; molecular function: catalytic activity (GO:0003824);; molecular function: sig…	MAPK signaling pathway - plant (ko04016)
	Unigene_522866	MPK5	9.77102e-05	5.60462	up	0.0863608	2.81981	normal	0.000351264	-4.17436	down	0.0191897	-3.44204	normal	1.6815e-07	-5.35259	down	0.644864	0.571791	normal	Protein kinase domain;; Protein tyrosine and serine/threonine kinase	Mitogen-activated protein kinase 5 OS=Oryza sativa subsp. indica OX=39946 GN=MPK5 PE=1 SV=2	Mitogen-activated protein kinase OS=Avena sativa OX=4498 GN=Asmap1 PE=2 SV=1	MAP KINASE [Avena sativa]	biological process: metabolic process (GO:0008152);; biological process: cellular process (GO:0009987);; biological process: signaling (GO:0023052);; biological process: single-organism process (GO:0044699);; biological process: response to stimulus (GO:0050896);; biological process: biological regulation (GO:0065007);; molecular function: catalytic activity (GO:0003824);; molecular function: sig…	MAPK signaling pathway - plant (ko04016);; Plant-pathogen interaction (ko04626)
	Unigene_514188	MAPKKK17	0.00525434	3.53533	up	0.169861	1.27685	normal	4.10034e-10	-6.29254	down	5.42843e-05	-4.47647	down	0.000540997	-4.53462	down	0.103483	-1.88562	normal	Protein kinase domain;; Protein tyrosine and serine/threonine kinase	Mitogen-activated protein kinase kinase kinase 17 OS=Arabidopsis thaliana OX=3702 GN=MAPKKK17 PE=1 SV=1	Protein kinase domain-containing protein OS=Aegilops tauschii subsp. strangulata OX=200361 PE=3 SV=1	mitogen-activated protein kinase kinase kinase 18 [Brachypodium distachyon]	biological process: metabolic process (GO:0008152);; biological process: cellular process (GO:0009987);; biological process: signaling (GO:0023052);; biological process: single-organism process (GO:0044699);; biological process: response to stimulus (GO:0050896);; biological process: biological regulation (GO:0065007);; biological process: cellular component organization or biogenesis (GO:0071840…	MAPK signaling pathway - plant (ko04016)
	Unigene_603204	MPK7	0.0033515	4.02802	up	0.0916256	2.12379	normal	0.00115561	-3.25542	down	0.000128968	-2.75675	down	0.000512093	-2.60573	down	0.22378	-1.11011	normal	Protein kinase domain;; Protein tyrosine and serine/threonine kinase;; Lipopolysaccharide kinase (Kdo/WaaP) family	Mitogen-activated protein kinase 7 OS=Oryza sativa subsp. japonica OX=39947 GN=MPK7 PE=2 SV=1	Mitogen-activated protein kinase OS=Brachypodium distachyon OX=15368 GN=100844368 PE=4 SV=1	mitogen-activated protein kinase 7 [Brachypodium distachyon]	biological process: metabolic process (GO:0008152);; biological process: cellular process (GO:0009987);; biological process: signaling (GO:0023052);; biological process: single-organism process (GO:0044699);; biological process: response to stimulus (GO:0050896);; biological process: biological regulation (GO:0065007);; molecular function: catalytic activity (GO:0003824);; molecular function: sig…	--
	Unigene_016990	MAP3K12	0.00286288	3.91551	up	0.0587688	2.24817	normal	0.0736207	-1.97003	normal	0.00509328	-2.03148	down	0.00296502	-2.55597	down	0.318088	-0.948727	normal	PB1 domain;; Protein tyrosine and serine/threonine kinase;; Protein kinase domain;; Protein tyrosine and serine/threonine kinase	Mitogen-activated protein kinase kinase kinase 12 OS=Homo sapiens OX=9606 GN=MAP3K12 PE=1 SV=2	Protein kinase domain-containing protein OS=Brachypodium distachyon OX=15368 GN=100828846 PE=4 SV=1	hypothetical protein BRADI_1g28950v3 [Brachypodium distachyon]	biological process: response to stimulus (GO:0050896);; molecular function: catalytic activity (GO:0003824);; biological process: metabolic process (GO:0008152);; biological process: cellular process (GO:0009987);; molecular function: binding (GO:0005488);; cellular component: cell (GO:0005623);; cellular component: cell part (GO:0044464);; cellular component: organelle (GO:0043226);; cellular co…	MAPK signaling pathway - plant (ko04016);; Plant hormone signal transduction (ko04075)
Glutathione hydrolase	Unigene_001749	GGT3	0.0032559	3.8488	up	0.23217	1.47489	normal	0.535777	-0.88291	normal	0.00607274	-1.88827	down	0.0012478	-2.66855	down	0.95727	0.0737219	normal	Gamma-glutamyltranspeptidase	Glutathione hydrolase 3 OS=Arabidopsis thaliana OX=3702 GN=GGT3 PE=2 SV=1	Uncharacterized protein OS=Triticum aestivum OX=4565 PE=4 SV=1	hypothetical protein CFC21_033988 [Triticum aestivum]	biological process: response to stimulus (GO:0050896);; biological process: multi-organism process (GO:0051704);; molecular function: catalytic activity (GO:0003824);; cellular component: extracellular region (GO:0005576);; cellular component: extracellular region part (GO:0044421);; cellular component: cell (GO:0005623);; cellular component: cell part (GO:0044464);; cellular component: organelle…	Taurine and hypotaurine metabolism (ko00430);; Cyanoamino acid metabolism (ko00460);; Glutathione metabolism (ko00480);; Arachidonic acid metabolism (ko00590)
glutathione S-transferase (GST)	Unigene_006784	GST23	0.000602036	4.22168	up	--	--	--	0.000935369	-3.51192	down	0.00140429	-2.96485	down	0.00577789	-1.48718	down	0.482063	-0.672453	normal	Glutathione S-transferase, N-terminal domain;; Glutathione S-transferase, N-terminal domain;; Glutathione S-transferase, C-terminal domain;; Glutathione S-transferase, N-terminal domain;; Glutathione S-transferase, C-terminal domain	Glutathione transferase GST 23 OS=Zea mays OX=4577 PE=2 SV=1	Predicted protein OS=Hordeum vulgare subsp. vulgare OX=112509 PE=2 SV=1	putative glutathione S-transferase [Hordeum vulgare]	molecular function: binding (GO:0005488)	Glutathione metabolism (ko00480)
Glutathione synthetase (GSH)	Unigene_600305	GSH2	0.00174995	4.50701	up	0.0598451	2.33057	normal	0.00432677	-2.76663	down	0.00503965	-2.30966	down	3.15454e-05	-3.63753	down	0.00822237	-2.1778	down	Eukaryotic glutathione synthase, ATP binding domain;; Eukaryotic glutathione synthase	Glutathione synthetase, chloroplastic OS=Brassica juncea OX=3707 GN=GSH2 PE=2 SV=1	Glutathione synthetase OS=Hordeum vulgare subsp. vulgare OX=112509 PE=3 SV=1	predicted protein [Hordeum vulgare subsp. vulgare]	molecular function: catalytic activity (GO:0003824);; biological process: metabolic process (GO:0008152);; biological process: cellular process (GO:0009987);; molecular function: binding (GO:0005488)	Cysteine and methionine metabolism (ko00270);; Glutathione metabolism (ko00480)
Glutamate decarboxylase	Unigene_032852	GAD	0.331327	-1.04073	normal	0.000119207	-1.33092	down	0.000660186	3.25997	up	0.00244469	2.40542	up	1.03224e-12	4.48945	up	4.25336e-07	3.1809	up	Pyridoxal-dependent decarboxylase conserved domain;; Pyridoxal-dependent decarboxylase conserved domain	Glutamate decarboxylase OS=Petunia hybrida OX=4102 GN=GAD PE=1 SV=1	Glutamate decarboxylase OS=Zea mays OX=4577 GN=100284394 PE=3 SV=1	Pyridoxal phosphate (PLP)-dependent transferase superfamily protein [Zea mays]	molecular function: catalytic activity (GO:0003824);; biological process: metabolic process (GO:0008152);; biological process: cellular process (GO:0009987);; biological process: single-organism process (GO:0044699);; molecular function: binding (GO:0005488)	Alanine, aspartate and glutamate metabolism (ko00250);; beta-Alanine metabolism (ko00410);; Taurine and hypotaurine metabolism (ko00430);; Butanoate metabolism (ko00650)
